# Supplementary material
Source: PubMed Central journal article supplement (PMC3271714)
Supplement: supp_blood-2011-06-363887_Document1.pdf [file supp_blood-2011-06-363887_Document1.pdf]

**Table S1.** Differentially expressed genes in Study 1 PC samples revealed by ANOVA

| No. | Gene Symbol                      | Gene Title                                                                       | p-value  | RefSeq ID                                              |
|-----|----------------------------------|----------------------------------------------------------------------------------|----------|--------------------------------------------------------|
| 1   | Asb4                             | ankyrin repeat and SOCS box-containing 4                                         | 1.21E-17 | NM_023048                                              |
| 2   | Slc25a4                          | solute carrier family 25 (mitochondrial carrier, adenine nucleotide translocator | 8.78E-14 | NM_007450                                              |
| 3   | Itih5                            | inter-alpha (globulin) inhibitor H5                                              | 3.29E-13 | NM_172471                                              |
| 4   | Osbpl1a                          | oxysterol binding protein-like 1A                                                | 6.24E-13 | NM_207530                                              |
| 5   | Igh-6                            | immunoglobulin heavy chain 6 (heavy chain of IgM)                                | 3.68E-12 | ---                                                    |
| 6   | Dpt                              | dermatopontin                                                                    | 6.95E-12 | NM_019759                                              |
| 7   | Nts                              | neurotensin                                                                      | 2.10E-11 | NM_024435                                              |
| 8   | Slc25a4                          | solute carrier family 25 (mitochondrial carrier, adenine nucleotide translocator | 2.56E-11 | NM_007450                                              |
| 9   | Igk-V1                           | immunoglobulin kappa chain variable 1 (V1)                                       | 2.61E-11 | ---                                                    |
| 10  | Ogn                              | osteoglycin                                                                      | 7.40E-11 | NM_008760                                              |
| 11  | Rdx                              | radixin                                                                          | 1.49E-10 | NM_001104616 /// NM_001104617 /// NM_009041            |
| 12  | Smoc1                            | SPARC related modular calcium binding 1                                          | 1.61E-10 | NM_001146217 /// NM_022316                             |
| 13  | Osbpl1a                          | oxysterol binding protein-like 1A                                                | 1.78E-10 | NM_207530                                              |
| 14  | Extl2                            | exostosin (multiple)-like 2                                                      | 2.18E-10 | NM_001163514 /// NM_001163515 /// NM_021388            |
| 15  | Igh-6                            | immunoglobulin heavy chain 6 (heavy chain of IgM)                                | 2.53E-10 | ---                                                    |
| 16  | Smyd2                            | SET and MYND domain containing 2                                                 | 3.30E-10 | NM_026796                                              |
| 17  | Klra17                           | killer cell lectin-like receptor, subfamily A, member 17                         | 4.80E-10 | NM_133203                                              |
| 18  | Slc25a4                          | solute carrier family 25 (mitochondrial carrier, adenine nucleotide translocator | 6.01E-10 | NM_007450                                              |
| 19  | Nav2                             | neuron navigator 2                                                               | 6.21E-10 | NM_001111016 /// NM_175272                             |
| 20  | Ear1 /// Ear12 /// Ear2 /// Ear3 | eosinophil-associated, ribonuclease A family, member 1 /// eosinophil-associated | 6.82E-10 | NM_001012766 /// NM_007894 /// NM_007895 /// NM_017388 |
| 21  | Enpp2                            | ectonucleotide pyrophosphatase/phosphodiesterase 2                               | 7.18E-10 | NM_001136077 /// NM_015744                             |
| 22  | Tshz1                            | teashirt zinc finger family member 1                                             | 8.06E-10 | NM_001081300                                           |
| 23  | Lpl                              | lipoprotein lipase                                                               | 8.80E-10 | NM_008509                                              |
| 24  | Sod1                             | superoxide dismutase 1, soluble                                                  | 9.46E-10 | NM_011434                                              |
| 25  | 1190002H23Rik                    | RIKEN cDNA 1190002H23 gene                                                       | 1.09E-09 | NM_025427                                              |
| 26  | Hoxc4                            | homeo box C4                                                                     | 1.09E-09 | NM_013553                                              |
| 27  | Neurog3                          | neurogenin 3                                                                     | 1.20E-09 | NM_009719                                              |
| 28  | Abca8b                           | ATP-binding cassette, sub-family A (ABC1), member 8b                             | 1.26E-09 | NM_013851                                              |
| 29  | 2610018G03Rik                    | RIKEN cDNA 2610018G03 gene                                                       | 1.31E-09 | NM_133729                                              |
| 30  | Rdx                              | radixin                                                                          | 1.46E-09 | NM_001104616 /// NM_001104617 /// NM_009041            |
| 31  | Col6a1                           | collagen, type VI, alpha 1                                                       | 1.46E-09 | NM_009933                                              |
| 32  | Zadh2                            | zinc binding alcohol dehydrogenase, domain containing 2                          | 1.65E-09 | NM_146090                                              |
| 33  | Cd163                            | CD163 antigen                                                                    | 1.86E-09 | NM_053094                                              |
| 34  | 5730403B10Rik                    | RIKEN cDNA 5730403B10 gene                                                       | 2.31E-09 | NM_025670                                              |
| 35  | Mgst1                            | microsomal glutathione S-transferase 1                                           | 2.58E-09 | NM_019946                                              |
| 36  | Car15                            | carbonic anhydrase 15                                                            | 4.60E-09 | NM_030558                                              |
| 37  | Sdpr                             | serum deprivation response                                                       | 4.71E-09 | NM_138741                                              |
| 38  | Sliit3                           | Sliit homolog 3 (Drosophila)                                                     | 4.98E-09 | NM_011412                                              |
| 39  | Uhrf1bp1l                        | UHRF1 (ICBP90) binding protein 1-like                                            | 5.65E-09 | NM_029166                                              |
| 40  | Serpini1                         | serine (or cysteine) peptidase inhibitor, clade I, member 1                      | 6.35E-09 | NM_009250                                              |
| 41  | Ly6d                             | lymphocyte antigen 6 complex, locus D                                            | 7.19E-09 | NM_010742                                              |
| 42  | Fabp4                            | fatty acid binding protein 4, adipocyte                                          | 8.57E-09 | NM_024406                                              |
| 43  | 2310061J03Rik                    | RIKEN cDNA 2310061J03 gene                                                       | 8.95E-09 | NM_133677 /// NR_027965                                |

|    |                      |                                                                                  |          |                                                                     |
|----|----------------------|----------------------------------------------------------------------------------|----------|---------------------------------------------------------------------|
| 44 | Acsl1                | acyl-CoA synthetase long-chain family member 1                                   | 1.13E-08 | NM_007981                                                           |
| 45 | C3                   | complement component 3                                                           | 1.28E-08 | NM_009778                                                           |
| 46 | Gsn                  | gelsolin                                                                         | 1.28E-08 | NM_146120                                                           |
| 47 | Pfn2                 | profilin 2                                                                       | 1.47E-08 | NM_019410                                                           |
| 48 | Pdgfra               | platelet derived growth factor receptor, alpha polypeptide                       | 1.50E-08 | NM_001083316 /// NM_011058                                          |
| 49 | Ctsc                 | cathepsin C                                                                      | 1.51E-08 | NM_009982                                                           |
| 50 | Gsn                  | gelsolin                                                                         | 1.82E-08 | NM_146120                                                           |
| 51 | Steap4               | STEAP family member 4                                                            | 1.96E-08 | NM_054098                                                           |
| 52 | G0s2                 | G0/G1 switch gene 2                                                              | 2.33E-08 | NM_008059                                                           |
| 53 | Rnase4               | ribonuclease, RNase A family 4                                                   | 2.48E-08 | NM_021472 /// NM_201239                                             |
| 54 | Tgfb2                | transforming growth factor, beta 2                                               | 2.75E-08 | NM_009367                                                           |
| 55 | F13a1                | coagulation factor XIII, A1 subunit                                              | 2.90E-08 | NM_028784                                                           |
| 56 | Slc1a1               | solute carrier family 1 (neuronal/epithelial high affinity glutamate transporter | 2.91E-08 | NM_009199                                                           |
| 57 | Ms4a6d               | membrane-spanning 4-domains, subfamily A, member 6D                              | 3.11E-08 | NM_026835                                                           |
| 58 | Srgn                 | serglycin                                                                        | 3.24E-08 | NM_011157                                                           |
| 59 | Klk1                 | kallikrein 1                                                                     | 3.25E-08 | NM_010639                                                           |
| 60 | Itga9                | integrin alpha 9                                                                 | 3.26E-08 | NM_001113514 /// NM_133721                                          |
| 61 | Usp3                 | ubiquitin specific peptidase 3                                                   | 3.27E-08 | NM_144937                                                           |
| 62 | Ndn                  | necdin                                                                           | 3.32E-08 | NM_010882                                                           |
| 63 | 5730403B10Rik        | RIKEN cDNA 5730403B10 gene                                                       | 3.37E-08 | NM_025670                                                           |
| 64 | ---                  | ---                                                                              | 3.39E-08 | ---                                                                 |
| 65 | Ear2                 | eosinophil-associated, ribonuclease A family, member 2                           | 3.42E-08 | NM_007895                                                           |
| 66 | Slamf9               | SLAM family member 9                                                             | 3.47E-08 | NM_029612                                                           |
| 67 | Ccl9                 | chemokine (C-C motif) ligand 9                                                   | 3.61E-08 | NM_011338                                                           |
| 68 | Lrrflp1              | leucine rich repeat (in FLII) interacting protein 1                              | 3.69E-08 | NM_001111311 /// NM_001111312 /// NM_008515                         |
| 69 | Ppap2a               | phosphatidic acid phosphatase type 2A                                            | 3.69E-08 | NM_008247 /// NM_008903                                             |
| 70 | Cxxc5                | CXXC finger 5                                                                    | 3.76E-08 | NM_133687                                                           |
| 71 | Tmem176a             | transmembrane protein 176A                                                       | 3.89E-08 | NM_001098271 /// NM_025326                                          |
| 72 | Fbn1                 | fibrillin 1                                                                      | 4.05E-08 | NM_007993                                                           |
| 73 | Nek7                 | NIMA (never in mitosis gene a)-related expressed kinase 7                        | 4.12E-08 | NM_021605                                                           |
| 74 | Nrp1                 | neuropilin 1                                                                     | 4.22E-08 | NM_008737                                                           |
| 75 | Cyp2b10              | cytochrome P450, family 2, subfamily b, polypeptide 10                           | 4.70E-08 | NM_009998 /// NM_009999                                             |
| 76 | 6720475J19Rik        | RIKEN cDNA 6720475J19 gene                                                       | 4.71E-08 | XM_001474896 /// XM_001481296                                       |
| 77 | Ccl8                 | chemokine (C-C motif) ligand 8                                                   | 4.92E-08 | NM_021443 /// XM_001480890                                          |
| 78 | Prkcz                | protein kinase C, zeta                                                           | 5.19E-08 | NM_001039079 /// NM_008860                                          |
| 79 | Tspan15              | tetraspanin 15                                                                   | 5.52E-08 | NM_197996                                                           |
| 80 | 2010107G23Rik        | RIKEN cDNA 2010107G23 gene                                                       | 5.96E-08 | NM_027251                                                           |
| 81 | Ctsb                 | cathepsin B                                                                      | 6.05E-08 | NM_007798                                                           |
| 82 | Col3a1               | collagen, type III, alpha 1                                                      | 6.28E-08 | NM_009930                                                           |
| 83 | C1s /// LOC100044326 | complement component 1, s subcomponent /// similar to Complement component 1     | 6.80E-08 | NM_001097617 /// NM_144938 /// XR_030514                            |
| 84 | Extl2                | exostosin (multiple)-like 2                                                      | 6.86E-08 | NM_001163514 /// NM_001163515 /// NM_021388                         |
| 85 | Cd36                 | CD36 antigen                                                                     | 6.90E-08 | NM_001159555 /// NM_001159556 /// NM_001159557 /// NM_001159558 /// |
| 86 | Egln1                | EGL nine homolog 1 (C. elegans)                                                  | 6.96E-08 | NM_053207                                                           |
| 87 | Degs1                | degenerative spermatocyte homolog 1 (Drosophila)                                 | 7.32E-08 | NM_007853                                                           |
| 88 | Kdm5b                | lysine (K)-specific demethylase 5B                                               | 7.36E-08 | NM_152895                                                           |
| 89 | Ptger4               | prostaglandin E receptor 4 (subtype EP4)                                         | 8.23E-08 | NM_001136079 /// NM_008965                                          |

|     |                               |                                                                                  |          |                                                                       |
|-----|-------------------------------|----------------------------------------------------------------------------------|----------|-----------------------------------------------------------------------|
| 90  | Ttc8                          | tetratricopeptide repeat domain 8                                                | 8.46E-08 | NM_029553 /// NM_198311                                               |
| 91  | Lifr                          | leukemia inhibitory factor receptor                                              | 8.61E-08 | NM_001113386 /// NM_013584                                            |
| 92  | Ccdc80                        | coiled-coil domain containing 80                                                 | 8.72E-08 | NM_026439                                                             |
| 93  | Ugt1a1 /// Ugt1a10 /// Ugt1a2 | UDP glucuronosyltransferase 1 family, polypeptide A1 /// UDP glycosyltransferase | 9.26E-08 | NM_013701 /// NM_145079 /// NM_201410 /// NM_201641 /// NM_201642 /// |
| 94  | Smad7                         | MAD homolog 7 (Drosophila)                                                       | 9.72E-08 | NM_001042660                                                          |
| 95  | Impad1                        | inositol monophosphatase domain containing 1                                     | 1.02E-07 | NM_177730                                                             |
| 96  | Dsp                           | desmoplakin                                                                      | 1.03E-07 | NM_023842 /// XM_001481272 /// XM_621314 /// XM_896350                |
| 97  | Frmf6                         | FERM domain containing 6                                                         | 1.05E-07 | NM_028127                                                             |
| 98  | Ripply3                       | rippy3 homolog (zebrafish)                                                       | 1.06E-07 | NM_133229                                                             |
| 99  | Ccdc23                        | coiled-coil domain containing 23                                                 | 1.09E-07 | NM_001038998 /// NM_024462                                            |
| 100 | Degs1                         | degenerative spermatocyte homolog 1 (Drosophila)                                 | 1.10E-07 | NM_007853                                                             |
| 101 | Sntg2                         | syntrophin, gamma 2                                                              | 1.11E-07 | NM_172951                                                             |
| 102 | Gpnmb                         | glycoprotein (transmembrane) nmb                                                 | 1.15E-07 | NM_053110                                                             |
| 103 | Pkp4                          | plakophilin 4                                                                    | 1.16E-07 | NM_026361 /// NM_175464                                               |
| 104 | Prpf19                        | PRP19/PSO4 pre-mRNA processing factor 19 homolog (S. cerevisiae)                 | 1.21E-07 | NM_134129                                                             |
| 105 | Sgpp1                         | sphingosine-1-phosphate phosphatase 1                                            | 1.23E-07 | NM_030750                                                             |
| 106 | Antxr2                        | anthrax toxin receptor 2                                                         | 1.24E-07 | NM_133738                                                             |
| 107 | Colec12                       | collectin sub-family member 12                                                   | 1.28E-07 | NM_130449                                                             |
| 108 | Golm1                         | golgi membrane protein 1                                                         | 1.30E-07 | NM_001035122 /// NM_027307                                            |
| 109 | Meg3                          | maternally expressed 3                                                           | 1.31E-07 | NR_003633 /// NR_027651 /// NR_027652 /// XR_035480 /// XR_035483 /// |
| 110 | S100a10                       | S100 calcium binding protein A10 (calpactin)                                     | 1.36E-07 | NM_009112                                                             |
| 111 | Postn                         | perlastin, osteoblast specific factor                                            | 1.42E-07 | NM_015784                                                             |
| 112 | Ppap2a                        | phosphatidic acid phosphatase type 2A                                            | 1.43E-07 | NM_008247 /// NM_008903                                               |
| 113 | Unc50                         | unc-50 homolog (C. elegans)                                                      | 1.46E-07 | NM_026123                                                             |
| 114 | Pcolce                        | procollagen C-endopeptidase enhancer protein                                     | 1.48E-07 | NM_008788                                                             |
| 115 | Lgals3                        | lectin, galactose binding, soluble 3                                             | 1.48E-07 | NM_001145953 /// NM_010705                                            |
| 116 | Gsbs                          | G substrate                                                                      | 1.51E-07 | NM_011153                                                             |
| 117 | Klk1                          | kallikrein 1                                                                     | 1.53E-07 | NM_010639                                                             |
| 118 | Ndn                           | necdin                                                                           | 1.55E-07 | NM_010882                                                             |
| 119 | Usp2                          | ubiquitin specific peptidase 2                                                   | 1.67E-07 | NM_016808 /// NM_198091 /// NM_198092                                 |
| 120 | Ubl5                          | ubiquitin-like 5                                                                 | 1.67E-07 | NM_025401                                                             |
| 121 | Cyp27b1                       | cytochrome P450, family 27, subfamily b, polypeptide 1                           | 1.68E-07 | NM_010009                                                             |
| 122 | Mrc1                          | mannose receptor, C type 1                                                       | 1.77E-07 | NM_008625                                                             |
| 123 | Dcn                           | decorin                                                                          | 1.79E-07 | NM_007833                                                             |
| 124 | Slc12a8                       | solute carrier family 12 (potassium/chloride transporters), member 8             | 1.87E-07 | NM_001083902 /// NM_134251                                            |
| 125 | Gbp2                          | guanylate binding protein 2                                                      | 1.95E-07 | NM_010260                                                             |
| 126 | Cxxc5                         | CXXC finger 5                                                                    | 1.97E-07 | NM_133687                                                             |
| 127 | Grasp                         | GRP1 (general receptor for phosphoinositides 1)-associated scaffold protein      | 2.01E-07 | NM_019518                                                             |
| 128 | Usp3                          | ubiquitin specific peptidase 3                                                   | 2.01E-07 | NM_144937                                                             |
| 129 | Cyp4v3                        | cytochrome P450, family 4, subfamily v, polypeptide 3                            | 2.04E-07 | NM_133969                                                             |
| 130 | Emb                           | embigin                                                                          | 2.09E-07 | NM_010330                                                             |
| 131 | Ifi205 /// Mnda               | interferon activated gene 205 /// myeloid cell nuclear differentiation antigen   | 2.19E-07 | NM_001033450 /// NM_172648                                            |
| 132 | Gm5560 /// Gm8429 /// Slc25g5 | predicted gene 5560 /// predicted gene 8429 /// solute carrier family 25 (mitoch | 2.20E-07 | NM_001081233 /// NM_007451 /// XR_033177                              |
| 133 | Lyz2                          | lysozyme 2                                                                       | 2.31E-07 | NM_017372                                                             |
| 134 | LOC664787                     | similar to Sp110 nuclear body protein                                            | 2.31E-07 | XR_030524                                                             |
| 135 | Rab25                         | RAB25, member RAS oncogene family                                                | 2.59E-07 | NM_016899                                                             |

|     |                       |                                                                                 |          |                                                                     |
|-----|-----------------------|---------------------------------------------------------------------------------|----------|---------------------------------------------------------------------|
| 136 | C4bp                  | complement component 4 binding protein                                          | 2.68E-07 | NM_007576                                                           |
| 137 | Emb                   | embigin                                                                         | 2.70E-07 | NM_010330                                                           |
| 138 | Htra1                 | HtrA serine peptidase 1                                                         | 2.72E-07 | NM_019564                                                           |
| 139 | Tgfb1                 | transforming growth factor, beta induced                                        | 2.85E-07 | NM_009369                                                           |
| 140 | Fabp4                 | fatty acid binding protein 4, adipocyte                                         | 2.88E-07 | NM_024406                                                           |
| 141 | Hnrnpu                | heterogeneous nuclear ribonucleoprotein U                                       | 2.96E-07 | NM_016805                                                           |
| 142 | Dpyd                  | dihydropyrimidine dehydrogenase                                                 | 2.99E-07 | NM_170778                                                           |
| 143 | Tmeff2                | transmembrane protein with EGF-like and two follistatin-like domains 2          | 2.99E-07 | NM_019790                                                           |
| 144 | Gnai1                 | guanine nucleotide binding protein (G protein), alpha inhibiting 1              | 3.00E-07 | NM_010305                                                           |
| 145 | Ptpn20                | protein tyrosine phosphatase, non-receptor type 20                              | 3.02E-07 | NM_008978                                                           |
| 146 | Igl-V1                | immunoglobulin lambda chain, variable 1                                         | 3.09E-07 | ---                                                                 |
| 147 | Fbxo28                | F-box protein 28                                                                | 3.10E-07 | NM_175127                                                           |
| 148 | Igf1                  | insulin-like growth factor 1                                                    | 3.27E-07 | NM_001111274 /// NM_001111275 /// NM_001111276 /// NM_010512 /// NM |
| 149 | Ndn                   | necdin                                                                          | 3.28E-07 | NM_010882                                                           |
| 150 | Gstt1                 | glutathione S-transferase, theta 1                                              | 3.29E-07 | NM_008185                                                           |
| 151 | Snrpn /// Snurf       | small nuclear ribonucleoprotein N /// SNRPN upstream reading frame              | 3.39E-07 | NM_001082961 /// NM_001082962 /// NM_013670 /// NM_033174           |
| 152 | Scn11a                | sodium channel, voltage-gated, type XI, alpha                                   | 3.56E-07 | NM_011887                                                           |
| 153 | Cops7b                | COP9 (constitutive photomorphogenic) homolog, subunit 7b (Arabidopsis thaliana) | 3.56E-07 | NM_172974                                                           |
| 154 | Ndufv3                | NADH dehydrogenase (ubiquinone) flavoprotein 3                                  | 3.59E-07 | NM_001083891 /// NM_030087                                          |
| 155 | Trpc1                 | transient receptor potential cation channel, subfamily C, member 1              | 3.64E-07 | NM_011643                                                           |
| 156 | Gpx8                  | glutathione peroxidase 8 (putative)                                             | 3.68E-07 | NM_027127                                                           |
| 157 | Fhl1                  | four and a half LIM domains 1                                                   | 3.73E-07 | NM_001077361 /// NM_001077362 /// NM_010211                         |
| 158 | Gspt2                 | G1 to S phase transition 2                                                      | 3.75E-07 | NM_008179                                                           |
| 159 | Fam100b               | family with sequence similarity 100, member B                                   | 3.76E-07 | NM_176902                                                           |
| 160 | Cbr2                  | carbonyl reductase 2                                                            | 3.78E-07 | NM_007621                                                           |
| 161 | Bcl11a                | B-cell CLL/lymphoma 11A (zinc finger protein)                                   | 4.00E-07 | NM_001159289 /// NM_001159290 /// NM_016707                         |
| 162 | Fstl1                 | follistatin-like 1                                                              | 4.13E-07 | NM_008047                                                           |
| 163 | Gsta4                 | glutathione S-transferase, alpha 4                                              | 4.15E-07 | NM_010357                                                           |
| 164 | Dazl                  | deleted in azoospermia-like                                                     | 4.18E-07 | NM_010021                                                           |
| 165 | Lcp1                  | lymphocyte cytosolic protein 1                                                  | 4.20E-07 | NM_008879                                                           |
| 166 | Efemp1                | epidermal growth factor-containing fibulin-like extracellular matrix protein 1  | 4.29E-07 | NM_146015                                                           |
| 167 | Vim                   | vimentin                                                                        | 4.38E-07 | NM_011701                                                           |
| 168 | Spats2                | spermatogenesis associated, serine-rich 2                                       | 4.38E-07 | NM_139140                                                           |
| 169 | Gbp2                  | guanylate binding protein 2                                                     | 4.40E-07 | NM_010260                                                           |
| 170 | Cd36                  | CD36 antigen                                                                    | 4.46E-07 | NM_001159555 /// NM_001159556 /// NM_001159557 /// NM_001159558 /// |
| 171 | Mpeg1                 | macrophage expressed gene 1                                                     | 4.47E-07 | NM_010821                                                           |
| 172 | Ctsb                  | cathepsin B                                                                     | 4.57E-07 | NM_007798                                                           |
| 173 | Klk1b22 /// Klk1b9    | kallikrein 1-related peptidase b22 /// kallikrein 1-related peptidase b9        | 4.58E-07 | NM_010114 /// NM_010116                                             |
| 174 | Nrp1                  | neuropilin 1                                                                    | 4.65E-07 | NM_008737                                                           |
| 175 | Cryab                 | crystallin, alpha B                                                             | 4.67E-07 | NM_009964                                                           |
| 176 | Cnn3 /// LOC100047856 | calponin 3, acidic /// similar to calponin 3, acidic                            | 4.82E-07 | NM_028044 /// XM_001479297                                          |
| 177 | Nucb2                 | nucleobindin 2                                                                  | 5.09E-07 | NM_001130479 /// NM_016773                                          |
| 178 | LOC641050             | hypothetical protein LOC641050                                                  | 5.10E-07 | XM_918370                                                           |
| 179 | Plin2                 | perilipin 2                                                                     | 5.11E-07 | NM_007408                                                           |
| 180 | Hmgn3                 | high mobility group nucleosomal binding domain 3                                | 5.26E-07 | NM_026122 /// NM_175074                                             |
| 181 | Igf1                  | insulin-like growth factor 1                                                    | 5.31E-07 | NM_001111274 /// NM_001111275 /// NM_001111276 /// NM_010512 /// NM |

|     |                        |                                                                                  |          |                                                     |
|-----|------------------------|----------------------------------------------------------------------------------|----------|-----------------------------------------------------|
| 182 | Ptpn4                  | protein tyrosine phosphatase, non-receptor type 4                                | 5.35E-07 | NM_019933                                           |
| 183 | Aldh1a2                | aldehyde dehydrogenase family 1, subfamily A2                                    | 5.37E-07 | NM_009022                                           |
| 184 | Aox4                   | aldehyde oxidase 4                                                               | 5.39E-07 | NM_023631                                           |
| 185 | Trak1                  | trafficking protein, kinesin binding 1                                           | 5.50E-07 | NM_175114                                           |
| 186 | Basp1 /// LOC100045716 | brain abundant, membrane attached signal protein 1 /// similar to 22 kDa neurona | 5.72E-07 | NM_027395 /// XM_001474796                          |
| 187 | Bcl2l1                 | BCL2-like 1                                                                      | 5.82E-07 | NM_009743                                           |
| 188 | Skil                   | SKI-like                                                                         | 5.89E-07 | NM_001039090 /// NM_011386                          |
| 189 | Lamb1-1                | laminin B1 subunit 1                                                             | 6.19E-07 | NM_008482                                           |
| 190 | Fcgr3                  | Fc receptor, IgG, low affinity III                                               | 6.24E-07 | NM_010188                                           |
| 191 | Eif4e3                 | eukaryotic translation initiation factor 4E member 3                             | 6.33E-07 | NM_025829                                           |
| 192 | Lyz1                   | lysozyme 1                                                                       | 6.40E-07 | NM_013590                                           |
| 193 | Sash1                  | SAM and SH3 domain containing 1                                                  | 6.71E-07 | NM_175155                                           |
| 194 | Col6a2                 | collagen, type VI, alpha 2                                                       | 6.73E-07 | NM_146007                                           |
| 195 | Osgin1                 | oxidative stress induced growth inhibitor 1                                      | 6.94E-07 | NM_027950                                           |
| 196 | Dynlt3                 | dynein light chain Tctex-type 3                                                  | 7.11E-07 | NM_025975                                           |
| 197 | Grem2                  | gremlin 2 homolog, cysteine knot superfamily (Xenopus laevis)                    | 7.39E-07 | NM_011825                                           |
| 198 | Rdx                    | radixin                                                                          | 7.96E-07 | NM_001104616 /// NM_001104617 /// NM_009041         |
| 199 | Wwp1                   | WW domain containing E3 ubiquitin protein ligase 1                               | 8.10E-07 | NM_177327                                           |
| 200 | Tprkb                  | Tp53rk binding protein                                                           | 8.33E-07 | NM_176842                                           |
| 201 | Fcgr2b                 | Fc receptor, IgG, low affinity IIb                                               | 8.37E-07 | NM_001077189 /// NM_010187                          |
| 202 | Cnn3                   | Calponin 3, acidic                                                               | 8.62E-07 | NM_028044                                           |
| 203 | 9530028C05             | hypothetical protein 9530028C05                                                  | 8.71E-07 | ---                                                 |
| 204 | Slain1                 | SLAIN motif family, member 1                                                     | 8.80E-07 | NM_198014                                           |
| 205 | Gp49a /// LILRB4       | glycoprotein 49 A /// leukocyte immunoglobulin-like receptor, subfamily B, membe | 9.17E-07 | NM_008147 /// NM_013532                             |
| 206 | Ifi203                 | interferon activated gene 203                                                    | 9.26E-07 | NM_001045481 /// NM_008328                          |
| 207 | LOC100038746           | hypothetical LOC100038746                                                        | 9.27E-07 | ---                                                 |
| 208 | Map4k4                 | mitogen-activated protein kinase kinase kinase kinase 4                          | 9.54E-07 | NM_008696                                           |
| 209 | Gfra3 /// LOC100045484 | glial cell line derived neurotrophic factor family receptor alpha 3 /// similar  | 9.60E-07 | NM_010280 /// XM_001474380                          |
| 210 | Cald1                  | caldesmon 1                                                                      | 9.88E-07 | NM_145575                                           |
| 211 | Matn2                  | matrilin 2                                                                       | 1.02E-06 | NM_016762                                           |
| 212 | Spint1                 | serine protease inhibitor, Kunitz type 1                                         | 1.04E-06 | NM_016907                                           |
| 213 | Fstl1                  | follicle-stimulating hormone-like 1                                              | 1.07E-06 | NM_008047                                           |
| 214 | Pf4                    | platelet factor 4                                                                | 1.09E-06 | NM_019932                                           |
| 215 | Gpr137b-ps             | G protein-coupled receptor 137B, pseudogene                                      | 1.10E-06 | NR_003568 /// XR_001658                             |
| 216 | Hrh1 /// LOC100041871  | histamine receptor H1 /// similar to histamine receptor H1                       | 1.11E-06 | NM_008285 /// XR_031594                             |
| 217 | Dek                    | DEK oncogene (DNA binding)                                                       | 1.13E-06 | NM_025900                                           |
| 218 | Ccnd1                  | cyclin D1                                                                        | 1.16E-06 | NM_007631                                           |
| 219 | Asb4                   | ankyrin repeat and SOCS box-containing 4                                         | 1.17E-06 | NM_023048                                           |
| 220 | Scap                   | SREBF chaperone                                                                  | 1.19E-06 | NM_001001144 /// NM_001103162                       |
| 221 | Fxyd1                  | FXD domain-containing ion transport regulator 1                                  | 1.20E-06 | NM_019503 /// NM_052991 /// NM_052992 /// NM_194321 |
| 222 | ---                    | ---                                                                              | 1.21E-06 | ---                                                 |
| 223 | Vamp1                  | vesicle-associated membrane protein 1                                            | 1.24E-06 | NM_001080557 /// NM_009496                          |
| 224 | Adpgk                  | ADP-dependent glucokinase                                                        | 1.24E-06 | NM_028121                                           |
| 225 | Hlcs                   | holocarboxylase synthetase (biotin- [propionyl-Coenzyme A-carboxylase (ATP-hydro | 1.24E-06 | NM_139145                                           |
| 226 | Timp2                  | tissue inhibitor of metalloproteinase 2                                          | 1.25E-06 | NM_011594                                           |
| 227 | Cyp1b1                 | cytochrome P450, family 1, subfamily b, polypeptide 1                            | 1.26E-06 | NM_009994                                           |

|     |                               |                                                                                 |          |                                                                     |
|-----|-------------------------------|---------------------------------------------------------------------------------|----------|---------------------------------------------------------------------|
| 228 | 1500031L02RIK                 | RIKEN cDNA 1500031L02 gene                                                      | 1.27E-06 | NM_025892                                                           |
| 229 | Cdc37                         | cell division cycle 37 homolog (S. cerevisiae)                                  | 1.29E-06 | NM_016742                                                           |
| 230 | Gpr137b /// Gpr137b-ps /// LO | G protein-coupled receptor 137B /// G protein-coupled receptor 137B, pseudogene | 1.30E-06 | NM_031999 /// NR_003568 /// XM_001473441 /// XR_001658              |
| 231 | Mfsd4                         | major facilitator superfamily domain containing 4                               | 1.32E-06 | NM_001114662 /// NM_172510                                          |
| 232 | Runx111                       | runx-related transcription factor 1; translocated to, 1 (cyclin D-related)      | 1.33E-06 | NM_001111026 /// NM_001111027 /// NM_009822                         |
| 233 | C2cd2l                        | C2 calcium-dependent domain containing 2-like                                   | 1.34E-06 | NM_027909                                                           |
| 234 | Dennd4c                       | DENN/MADD domain containing 4C                                                  | 1.39E-06 | NM_001081014                                                        |
| 235 | Guca2b                        | guanylate cyclase activator 2b (retina)                                         | 1.41E-06 | NM_008191                                                           |
| 236 | Pip5k1b                       | phosphatidylinositol-4-phosphate 5-kinase, type 1 beta                          | 1.46E-06 | NM_008846                                                           |
| 237 | Col3a1                        | collagen, type III, alpha 1                                                     | 1.50E-06 | NM_009930                                                           |
| 238 | Tgfb2                         | transforming growth factor, beta 2                                              | 1.51E-06 | NM_009367                                                           |
| 239 | Entpd2                        | ectonucleoside triphosphate diphosphohydrolase 2                                | 1.52E-06 | NM_009849                                                           |
| 240 | Myl12b                        | myosin, light chain 12B, regulatory                                             | 1.54E-06 | NM_023402                                                           |
| 241 | Car3                          | carbonic anhydrase 3                                                            | 1.54E-06 | NM_007606                                                           |
| 242 | Fads2                         | fatty acid desaturase 2                                                         | 1.54E-06 | NM_019699                                                           |
| 243 | Ms4a6d                        | membrane-spanning 4-domains, subfamily A, member 6D                             | 1.58E-06 | NM_026835                                                           |
| 244 | Gramd3                        | GRAM domain containing 3                                                        | 1.59E-06 | NM_026240                                                           |
| 245 | Dnaja1                        | DnaJ (Hsp40) homolog, subfamily A, member 1                                     | 1.59E-06 | NM_008298                                                           |
| 246 | Pls3                          | plastin 3 (T-isoform)                                                           | 1.60E-06 | NM_145629                                                           |
| 247 | O610040J01RIK                 | RIKEN cDNA O610040J01 gene                                                      | 1.61E-06 | NM_029554                                                           |
| 248 | Ctse                          | cathepsin E                                                                     | 1.62E-06 | NM_007799                                                           |
| 249 | Prpf19                        | PRP19/PSO4 pre-mRNA processing factor 19 homolog (S. cerevisiae)                | 1.62E-06 | NM_134129                                                           |
| 250 | Gsn                           | gelsolin                                                                        | 1.66E-06 | NM_146120                                                           |
| 251 | Endod1                        | endonuclease domain containing 1                                                | 1.72E-06 | NM_028013                                                           |
| 252 | Gpr137b                       | G protein-coupled receptor 137B                                                 | 1.79E-06 | NM_031999                                                           |
| 253 | Ngfrap1                       | nerve growth factor receptor (TNFRSF16) associated protein 1                    | 1.80E-06 | NM_001110233 /// NM_001110234 /// NM_009750                         |
| 254 | Smad6                         | MAD homolog 6 (Drosophila)                                                      | 1.82E-06 | NM_008542                                                           |
| 255 | Cdcp1                         | CUB domain containing protein 1                                                 | 1.89E-06 | NM_133974                                                           |
| 256 | Cxcl12                        | chemokine (C-X-C motif) ligand 12                                               | 1.94E-06 | NM_001012477 /// NM_013655 /// NM_021704                            |
| 257 | Gbp1                          | guanylate binding protein 1                                                     | 1.94E-06 | NM_010259                                                           |
| 258 | Fkbp9                         | FK506 binding protein 9                                                         | 1.99E-06 | NM_012056                                                           |
| 259 | Stab1                         | stabilin 1                                                                      | 2.03E-06 | NM_138672                                                           |
| 260 | Tcta                          | T-cell leukemia translocation altered gene                                      | 2.05E-06 | NM_133986                                                           |
| 261 | Cyp27a1                       | cytochrome P450, family 27, subfamily a, polypeptide 1                          | 2.06E-06 | NM_024264                                                           |
| 262 | Reep3                         | receptor accessory protein 3                                                    | 2.08E-06 | NM_178606                                                           |
| 263 | Tnk2                          | tyrosine kinase, non-receptor, 2                                                | 2.13E-06 | NM_001110147 /// NM_016788                                          |
| 264 | Sqrdl                         | sulfide quinone reductase-like (yeast)                                          | 2.17E-06 | NM_001162503 /// NM_021507 /// NR_027888                            |
| 265 | Klhl22                        | kelch-like 22 (Drosophila)                                                      | 2.19E-06 | NM_145479 /// XM_001475578 /// XM_001478907                         |
| 266 | Pfn2                          | profilin 2                                                                      | 2.22E-06 | NM_019410                                                           |
| 267 | Mdfic                         | MyoD family inhibitor domain containing                                         | 2.24E-06 | NM_175088                                                           |
| 268 | Fam92a                        | family with sequence similarity 92, member A                                    | 2.27E-06 | NM_026558                                                           |
| 269 | Igf1                          | insulin-like growth factor 1                                                    | 2.27E-06 | NM_001111274 /// NM_001111275 /// NM_001111276 /// NM_010512 /// NM |
| 270 | Cald1                         | caldesmon 1                                                                     | 2.28E-06 | NM_145575                                                           |
| 271 | Gns                           | glucosamine (N-acetyl)-6-sulfatase                                              | 2.31E-06 | NM_029364                                                           |
| 272 | Fmod                          | fibromodulin                                                                    | 2.34E-06 | NM_021355                                                           |
| 273 | Fth1                          | ferritin heavy chain 1                                                          | 2.38E-06 | NM_010239                                                           |

|     |                               |                                                                                  |          |                                                                       |
|-----|-------------------------------|----------------------------------------------------------------------------------|----------|-----------------------------------------------------------------------|
| 274 | Upp1                          | uridine phosphorylase 1                                                          | 2.40E-06 | NM_001159401 /// NM_001159402 /// NM_009477                           |
| 275 | Klra5                         | killer cell lectin-like receptor, subfamily A, member 5                          | 2.42E-06 | NM_008463                                                             |
| 276 | Ms4a7                         | membrane-spanning 4-domains, subfamily A, member 7                               | 2.44E-06 | NM_001025610 /// NM_027836                                            |
| 277 | Spo11                         | sporulation protein, meiosis-specific, SPO11 homolog (S. cerevisiae)             | 2.45E-06 | NM_001083959 /// NM_001083960 /// NM_012046                           |
| 278 | Ch25h                         | cholesterol 25-hydroxylase                                                       | 2.45E-06 | NM_009890                                                             |
| 279 | Matk                          | megakaryocyte-associated tyrosine kinase                                         | 2.45E-06 | NM_010768                                                             |
| 280 | Pdgfc                         | platelet-derived growth factor, C polypeptide                                    | 2.46E-06 | NM_019971                                                             |
| 281 | Hipk1                         | homeodomain interacting protein kinase 1                                         | 2.49E-06 | NM_010432                                                             |
| 282 | Adcy9                         | adenylate cyclase 9                                                              | 2.51E-06 | NM_009624                                                             |
| 283 | Prdx1                         | peroxiredoxin 1                                                                  | 2.57E-06 | NM_011034                                                             |
| 284 | Pftk1                         | PFTAIRE protein kinase 1                                                         | 2.59E-06 | NM_011074                                                             |
| 285 | Gas5                          | growth arrest specific 5                                                         | 2.59E-06 | NR_002840                                                             |
| 286 | Ugt1a1 /// Ugt1a10 /// Ugt1a2 | UDP glucuronosyltransferase 1 family, polypeptide A1 /// UDP glycosyltransferase | 2.62E-06 | NM_013701 /// NM_145079 /// NM_201410 /// NM_201641 /// NM_201642 /// |
| 287 | Mmp23                         | matrix metalloproteinase 23                                                      | 2.65E-06 | NM_011985                                                             |
| 288 | Ttc39b                        | tetratricopeptide repeat domain 39B                                              | 2.66E-06 | NM_027238                                                             |
| 289 | Pgcp                          | plasma glutamate carboxypeptidase                                                | 2.73E-06 | NM_018755 /// NM_176073                                               |
| 290 | Cnn3 /// LOC100047856         | calponin 3, acidic /// similar to calponin 3, acidic                             | 2.74E-06 | NM_028044 /// XM_001479297                                            |
| 291 | Ccl6                          | chemokine (C-C motif) ligand 6                                                   | 2.74E-06 | NM_009139                                                             |
| 292 | Tmem176b                      | transmembrane protein 176B                                                       | 2.77E-06 | NM_001164207 /// NM_001164208 /// NM_001164209 /// NM_023056          |
| 293 | Spp1                          | secreted phosphoprotein 1                                                        | 2.81E-06 | NM_009263                                                             |
| 294 | Col20a1                       | collagen, type XX, alpha 1                                                       | 2.83E-06 | XM_001473208 /// XM_914804                                            |
| 295 | Serpnb1a                      | serine (or cysteine) peptidase inhibitor, clade B, member 1a                     | 2.84E-06 | NM_025429                                                             |
| 296 | Reep3                         | receptor accessory protein 3                                                     | 2.85E-06 | NM_178606                                                             |
| 297 | Lipt1                         | lipoyltransferase 1                                                              | 2.87E-06 | NM_001037918                                                          |
| 298 | Cklf                          | chemokine-like factor                                                            | 2.88E-06 | NM_001037841 /// NM_029295                                            |
| 299 | Gdap2                         | ganglioside-induced differentiation-associated-protein 2                         | 2.89E-06 | NM_010269                                                             |
| 300 | Ptprf                         | protein tyrosine phosphatase, receptor type, F                                   | 2.99E-06 | NM_011213                                                             |
| 301 | Notch2                        | Notch gene homolog 2 (Drosophila)                                                | 3.01E-06 | NM_010928                                                             |
| 302 | Obfc2b                        | oligonucleotide/oligosaccharide-binding fold containing 2B                       | 3.18E-06 | NM_027257                                                             |
| 303 | Dsp                           | desmoplakin                                                                      | 3.26E-06 | NM_023842 /// XM_001481272 /// XM_621314 /// XM_896350                |
| 304 | Morf4l1                       | mortality factor 4 like 1                                                        | 3.32E-06 | NM_001039147 /// NM_024431                                            |
| 305 | Xpr1                          | xenotropic and polytropic retrovirus receptor 1                                  | 3.46E-06 | NM_011273                                                             |
| 306 | Vim                           | vimentin                                                                         | 3.59E-06 | NM_011701                                                             |
| 307 | Rb1cc1                        | RB1-inducible coiled-coil 1                                                      | 3.64E-06 | NM_009826                                                             |
| 308 | Uck2                          | uridine-cytidine kinase 2                                                        | 3.73E-06 | NM_030724                                                             |
| 309 | Cyp2b10                       | cytochrome P450, family 2, subfamily b, polypeptide 10                           | 3.88E-06 | NM_009998 /// NM_009999                                               |
| 310 | Sipa1l2                       | signal-induced proliferation-associated 1 like 2                                 | 3.92E-06 | NM_001081337                                                          |
| 311 | Cabc1                         | chaperone, ABC1 activity of bc1 complex like (S. pombe)                          | 3.95E-06 | NM_001163290 /// NM_023341                                            |
| 312 | Cnn3 /// LOC100047856         | calponin 3, acidic /// similar to calponin 3, acidic                             | 3.95E-06 | NM_028044 /// XM_001479297                                            |
| 313 | Vpreb3                        | pre-B lymphocyte gene 3                                                          | 3.97E-06 | NM_009514                                                             |
| 314 | D4Wsu53e                      | DNA segment, Chr 4, Wayne State University 53, expressed                         | 3.99E-06 | NM_023665                                                             |
| 315 | Serpinf1                      | serine (or cysteine) peptidase inhibitor, clade F, member 1                      | 3.99E-06 | NM_011340                                                             |
| 316 | Tyrobp                        | TYRO protein tyrosine kinase binding protein                                     | 4.02E-06 | NM_011662                                                             |
| 317 | a                             | nonagouti                                                                        | 4.03E-06 | NM_015770                                                             |
| 318 | Tgfb1                         | transforming growth factor, beta induced                                         | 4.06E-06 | NM_009369                                                             |
| 319 | Tlr4                          | toll-like receptor 4                                                             | 4.08E-06 | NM_021297                                                             |

|     |                                 |                                                                                      |          |                                                                     |
|-----|---------------------------------|--------------------------------------------------------------------------------------|----------|---------------------------------------------------------------------|
| 320 | Macrod1                         | :MACRO domain containing 1                                                           | 4.09E-06 | NM_134147                                                           |
| 321 | Csf1r                           | :colony stimulating factor 1 receptor                                                | 4.10E-06 | NM_001037859                                                        |
| 322 | Sid12                           | :SID1 transmembrane family, member 2                                                 | 4.21E-06 | NM_172257                                                           |
| 323 | Ccl6                            | :chemokine (C-C motif) ligand 6                                                      | 4.27E-06 | NM_009139                                                           |
| 324 | Klhl13                          | :kelch-like 13 (Drosophila)                                                          | 4.27E-06 | NM_026167                                                           |
| 325 | Bmp2k                           | :BMP2 inducible kinase                                                               | 4.33E-06 | NM_080708                                                           |
| 326 | Sgk1                            | :serum/glucocorticoid regulated kinase 1                                             | 4.36E-06 | NM_001161845 /// NM_001161847 /// NM_001161848 /// NM_001161849 /// |
| 327 | Ndr1                            | :N-myc downstream regulated gene 1                                                   | 4.42E-06 | NM_008681                                                           |
| 328 | Aplp2                           | :amyloid beta (A4) precursor-like protein 2                                          | 4.44E-06 | NM_001102455 /// NM_001102456 /// NM_009691                         |
| 329 | 1810063B05Rik                   | :RIKEN cDNA 1810063B05 gene                                                          | 4.47E-06 | NM_174987                                                           |
| 330 | Cib2                            | :calcium and integrin binding family member 2                                        | 4.52E-06 | NM_019686                                                           |
| 331 | Nbea                            | :neurobeachin                                                                        | 4.57E-06 | NM_030595                                                           |
| 332 | Ptplad2                         | :protein tyrosine phosphatase-like A domain containing 2                             | 4.59E-06 | NM_025760                                                           |
| 333 | Hck                             | :hemopoietic cell kinase                                                             | 4.61E-06 | NM_010407                                                           |
| 334 | Ppap2b                          | :phosphatidic acid phosphatase type 2B                                               | 4.64E-06 | NM_080555                                                           |
| 335 | Pmp22                           | :peripheral myelin protein 22                                                        | 4.65E-06 | NM_008885                                                           |
| 336 | Figf /// LOC100047108           | :c-fos induced growth factor /// similar to FIGF                                     | 4.67E-06 | NM_010216 /// XM_001477393                                          |
| 337 | Fkbp9                           | :FK506 binding protein 9                                                             | 4.68E-06 | NM_012056                                                           |
| 338 | Ahnak                           | :AHNAK nucleoprotein (desmoyokin)                                                    | 4.80E-06 | NM_001039959 /// NM_009643                                          |
| 339 | Ckif                            | :chemokine-like factor                                                               | 4.89E-06 | NM_001037841 /// NM_029295                                          |
| 340 | Lgals1                          | :lectin, galactose binding, soluble 1                                                | 4.94E-06 | NM_008495                                                           |
| 341 | Rpl14                           | :ribosomal protein L14                                                               | 4.96E-06 | NM_025974                                                           |
| 342 | Anxa2                           | :annexin A2                                                                          | 5.03E-06 | NM_007585                                                           |
| 343 | Ptpn22                          | :protein tyrosine phosphatase, non-receptor type 22 (lymphoid)                       | 5.04E-06 | NM_008979                                                           |
| 344 | Tbcel                           | :tubulin folding cofactor E-like                                                     | 5.04E-06 | NM_173038                                                           |
| 345 | Cd93                            | :CD93 antigen                                                                        | 5.06E-06 | NM_010740                                                           |
| 346 | Rpl14                           | :ribosomal protein L14                                                               | 5.10E-06 | NM_025974                                                           |
| 347 | Sema3f                          | :sema domain, immunoglobulin domain (Ig), short basic domain, secreted, (semaphorin) | 5.11E-06 | NM_011349                                                           |
| 348 | Kdm5b                           | :lysine (K)-specific demethylase 5B                                                  | 5.23E-06 | NM_152895                                                           |
| 349 | Cav1                            | :caveolin 1, caveolae protein                                                        | 5.23E-06 | NM_007616                                                           |
| 350 | Igh /// Igh-2 /// Igh-VJ558 /// | :immunoglobulin heavy chain complex /// immunoglobulin heavy chain 2 (serum IgA)     | 5.23E-06 | ---                                                                 |
| 351 | Htra1                           | :HtrA serine peptidase 1                                                             | 5.24E-06 | NM_019564                                                           |
| 352 | Xpo1                            | :exportin 1, CRM1 homolog (yeast)                                                    | 5.27E-06 | NM_001035226 /// NM_134014                                          |
| 353 | Timp2                           | :tissue inhibitor of metalloproteinase 2                                             | 5.38E-06 | NM_011594                                                           |
| 354 | Trp53inp2                       | :transformation related protein 53 inducible nuclear protein 2                       | 5.42E-06 | NM_178111                                                           |
| 355 | Dnmt3a                          | :DNA methyltransferase 3A                                                            | 5.42E-06 | NM_007872 /// NM_153743                                             |
| 356 | Pnp1                            | :pyridoxine 5'-phosphate oxidase                                                     | 5.59E-06 | NM_134021                                                           |
| 357 | Cnn3 /// LOC100047856           | :calponin 3, acidic /// similar to calponin 3, acidic                                | 5.65E-06 | NM_028044 /// XM_001479297                                          |
| 358 | Rel1                            | :RELT-like 1                                                                         | 5.97E-06 | NM_145923                                                           |
| 359 | Slc1a1                          | :solute carrier family 1 (neuronal/epithelial high affinity glutamate transporter)   | 6.15E-06 | NM_009199                                                           |
| 360 | Dusp7                           | :dual specificity phosphatase 7                                                      | 6.20E-06 | NM_153459                                                           |
| 361 | Lama4                           | :laminin, alpha 4                                                                    | 6.20E-06 | NM_010681                                                           |
| 362 | Pawr                            | :PRKC, apoptosis, WT1, regulator                                                     | 6.28E-06 | NM_054056                                                           |
| 363 | Agl                             | :amylo-1,6-glucosidase, 4-alpha-glucanotransferase                                   | 6.63E-06 | NM_001081326                                                        |
| 364 | Anxa1                           | :annexin A1                                                                          | 6.63E-06 | NM_010730                                                           |
| 365 | Trf                             | :transferrin                                                                         | 6.64E-06 | NM_133977                                                           |



|     |                      |                                                                            |          |                                             |
|-----|----------------------|----------------------------------------------------------------------------|----------|---------------------------------------------|
| 366 | Scgb3a1              | secretoglobin, family 3A, member 1                                         | 6.70E-06 | NM_054037 /// NM_170727                     |
| 367 | Kitl                 | kit ligand                                                                 | 6.73E-06 | NM_013598                                   |
| 368 | Ifi203               | interferon activated gene 203                                              | 6.74E-06 | NM_001045481 /// NM_008328                  |
| 369 | Adnp2                | ADNP homeobox 2                                                            | 6.77E-06 | NM_175028 /// XM_140497 /// XM_989242       |
| 370 | Hapln1               | hyaluronan and proteoglycan link protein 1                                 | 6.77E-06 | NM_013500                                   |
| 371 | Dcaf8                | DDB1 and CUL4 associated factor 8                                          | 6.78E-06 | NM_153555                                   |
| 372 | Cbs                  | cystathionine beta-synthase                                                | 6.79E-06 | NM_144855 /// NM_178224                     |
| 373 | Syk                  | spleen tyrosine kinase                                                     | 6.82E-06 | NM_011518                                   |
| 374 | Phldb2               | pleckstrin homology-like domain, family B, member 2                        | 6.96E-06 | NM_153412                                   |
| 375 | Scd1                 | stearoyl-Coenzyme A desaturase 1                                           | 6.98E-06 | NM_009127                                   |
| 376 | Ckif                 | chemokine-like factor                                                      | 7.11E-06 | NM_001037841 /// NM_029295                  |
| 377 | Asb5                 | ankyrin repeat and SOCs box-containing 5                                   | 7.18E-06 | NM_029569                                   |
| 378 | Plxnc1               | plexin C1                                                                  | 7.32E-06 | NM_018797                                   |
| 379 | Dram1                | DNA-damage regulated autophagy modulator 1                                 | 7.33E-06 | NM_027878                                   |
| 380 | Osbpl2               | oxysterol binding protein-like 2                                           | 7.41E-06 | NM_144500                                   |
| 381 | Hsd17b11             | hydroxysteroid (17-beta) dehydrogenase 11                                  | 7.55E-06 | NM_053262                                   |
| 382 | Rab30                | RAB30, member RAS oncogene family                                          | 7.64E-06 | NM_029494                                   |
| 383 | Frdm4b               | FERM domain containing 4B                                                  | 7.70E-06 | NM_145148                                   |
| 384 | Pira2                | paired-Ig-like receptor A2                                                 | 7.80E-06 | NM_011089                                   |
| 385 | Chst1                | carbohydrate (keratan sulfate Gal-6) sulfotransferase 1                    | 7.87E-06 | NM_023850                                   |
| 386 | Zc3h11a              | zinc finger CCCH type containing 11A                                       | 7.91E-06 | NM_144530                                   |
| 387 | Aldoc                | aldolase C, fructose-bisphosphate                                          | 7.92E-06 | NM_009657                                   |
| 388 | Il2rg                | interleukin 2 receptor, gamma chain                                        | 7.95E-06 | NM_013563                                   |
| 389 | Prdx6                | peroxiredoxin 6                                                            | 8.11E-06 | NM_007453                                   |
| 390 | Pam                  | peptidylglycine alpha-amidating monooxygenase                              | 8.19E-06 | NM_013626                                   |
| 391 | Marcks               | myristoylated alanine rich protein kinase C substrate                      | 8.22E-06 | NM_008538                                   |
| 392 | Endod1               | endonuclease domain containing 1                                           | 8.25E-06 | NM_028013                                   |
| 393 | Prcp                 | prolylcarboxypeptidase (angiotensinase C)                                  | 8.61E-06 | NM_028243 /// XR_034467                     |
| 394 | Arsg                 | arylsulfatase G                                                            | 8.77E-06 | NM_028710                                   |
| 395 | Usp2                 | ubiquitin specific peptidase 2                                             | 8.78E-06 | NM_016808 /// NM_198091 /// NM_198092       |
| 396 | Cd209g               | CD209g antigen                                                             | 8.83E-06 | XM_284376 /// XM_904704                     |
| 397 | Tfrc                 | transferrin receptor                                                       | 8.86E-06 | NM_011638                                   |
| 398 | Gpr177               | G protein-coupled receptor 177                                             | 8.95E-06 | NM_026582                                   |
| 399 | Rnf214               | ring finger protein 214                                                    | 8.98E-06 | NM_178709                                   |
| 400 | Decr1                | 2,4-dienoyl CoA reductase 1, mitochondrial                                 | 9.03E-06 | NM_026172                                   |
| 401 | Slc6a8               | solute carrier family 6 (neurotransmitter transporter, creatine), member 8 | 9.25E-06 | NM_001142809 /// NM_001142810 /// NM_133987 |
| 402 | Il7r                 | interleukin 7 receptor                                                     | 9.26E-06 | NM_008372                                   |
| 403 | Gm2397               | predicted gene 2397                                                        | 9.34E-06 | XM_001473420                                |
| 404 | Ubi7                 | ubiquitin-like 7 (bone marrow stromal cell-derived)                        | 9.43E-06 | NM_001122873 /// NM_027086                  |
| 405 | Cd34                 | CD34 antigen                                                               | 9.79E-06 | NM_001111059 /// NM_133654                  |
| 406 | Man1a2               | mannosidase, alpha, class 1A, member 2                                     | 1.01E-05 | NM_010763                                   |
| 407 | Igk-V1               | immunoglobulin kappa chain variable 1 (V1)                                 | 1.02E-05 | ---                                         |
| 408 | Cd68                 | CD68 antigen                                                               | 1.05E-05 | NM_009853                                   |
| 409 | Bex2                 | brain expressed X-linked 2                                                 | 1.06E-05 | NM_009749                                   |
| 410 | Cfh /// LOC100048018 | complement component factor h /// similar to complement component factor H | 1.06E-05 | NM_009888 /// XM_001479650                  |
| 411 | Spint2               | serine protease inhibitor, Kunitz type 2                                   | 1.06E-05 | NM_001082548 /// NM_011464                  |

|     |                          |                                                                                   |          |                                                              |
|-----|--------------------------|-----------------------------------------------------------------------------------|----------|--------------------------------------------------------------|
| 412 | Meis1                    | Meis homeobox 1                                                                   | 1.07E-05 | NM_010789                                                    |
| 413 | Ndn                      | neclin                                                                            | 1.07E-05 | NM_010882                                                    |
| 414 | Galnt1                   | UDP-N-acetyl-alpha-D-galactosamine: polypeptide N-acetylgalactosaminyltransferase | 1.08E-05 | NM_001160404 /// NM_013814                                   |
| 415 | Rel1                     | RELT-like 1                                                                       | 1.08E-05 | NM_145923                                                    |
| 416 | Gas6                     | growth arrest specific 6                                                          | 1.09E-05 | NM_019521                                                    |
| 417 | Mttp                     | microsomal triglyceride transfer protein                                          | 1.09E-05 | NM_001163457 /// NM_008642                                   |
| 418 | Fcrla                    | Fc receptor-like A                                                                | 1.09E-05 | NM_001160215 /// NM_145141 /// NR_027666                     |
| 419 | Napg                     | N-ethylmaleimide sensitive fusion protein attachment protein gamma                | 1.10E-05 | NM_028017                                                    |
| 420 | Cd47                     | CD47 antigen (Rh-related antigen, integrin-associated signal transducer)          | 1.10E-05 | NM_010581                                                    |
| 421 | Cav2                     | caveolin 2                                                                        | 1.11E-05 | NM_016900                                                    |
| 422 | Glrx2                    | glutaredoxin 2 (thioltransferase)                                                 | 1.12E-05 | NM_001038592 /// NM_001038593 /// NM_001038594 /// NM_023505 |
| 423 | Stxbp6                   | syntaxin binding protein 6 (amisyn)                                               | 1.13E-05 | NM_144552                                                    |
| 424 | Tpst2                    | protein-tyrosine sulfotransferase 2                                               | 1.16E-05 | NM_009419                                                    |
| 425 | ---                      | ---                                                                               | 1.18E-05 | ---                                                          |
| 426 | Ltbp2                    | latent transforming growth factor beta binding protein 2                          | 1.21E-05 | NM_013589                                                    |
| 427 | Tcea1                    | transcription elongation factor A (SII) 1                                         | 1.21E-05 | NM_001159750 /// NM_001159751 /// NM_011541                  |
| 428 | Cfb                      | complement factor B                                                               | 1.22E-05 | NM_001142706 /// NM_008198                                   |
| 429 | Alox5ap                  | arachidonate 5-lipoxygenase activating protein                                    | 1.23E-05 | NM_009663                                                    |
| 430 | Boc                      | biregional cell adhesion molecule-related/down-regulated by oncogenes (Cdon) bin  | 1.24E-05 | NM_172506                                                    |
| 431 | Spint2                   | serine protease inhibitor, Kunitz type 2                                          | 1.24E-05 | NM_001082548 /// NM_011464                                   |
| 432 | Casp3                    | caspase 3                                                                         | 1.25E-05 | NM_009810                                                    |
| 433 | Ifi203                   | interferon activated gene 203                                                     | 1.26E-05 | NM_001045481 /// NM_008328                                   |
| 434 | C4b                      | complement component 4B (Chido blood group)                                       | 1.27E-05 | NM_009780                                                    |
| 435 | Acsl6                    | acyl-CoA synthetase long-chain family member 6                                    | 1.27E-05 | NM_001033597 /// NM_001033598 /// NM_001033599 /// NM_144823 |
| 436 | Grp                      | gastrin releasing peptide                                                         | 1.27E-05 | NM_175012                                                    |
| 437 | Man2c1                   | mannosidase, alpha, class 2C, member 1                                            | 1.27E-05 | NM_028636                                                    |
| 438 | Cxcl12                   | chemokine (C-X-C motif) ligand 12                                                 | 1.28E-05 | NM_001012477 /// NM_013655 /// NM_021704                     |
| 439 | Pml                      | promyelocytic leukemia                                                            | 1.31E-05 | NM_008884 /// NM_178087                                      |
| 440 | Itga6                    | integrin alpha 6                                                                  | 1.32E-05 | NM_008397                                                    |
| 441 | Igsf6                    | immunoglobulin superfamily, member 6                                              | 1.32E-05 | NM_030691                                                    |
| 442 | Gprc5b                   | G protein-coupled receptor, family C, group 5, member B                           | 1.33E-05 | NM_022420                                                    |
| 443 | Sh3kbp1                  | SH3-domain kinase binding protein 1                                               | 1.34E-05 | NM_001135727 /// NM_001135728 /// NM_021389                  |
| 444 | Adamts5 /// LOC100048332 | a disintegrin-like and metallopeptidase (reprolysin type) with thrombospondin ty  | 1.35E-05 | NM_0111782 /// XM_001480027                                  |
| 445 | Eef1a2                   | eukaryotic translation elongation factor 1 alpha 2                                | 1.35E-05 | NM_007906                                                    |
| 446 | Rtkn                     | rhotekin                                                                          | 1.36E-05 | NM_001136227 /// NM_009106 /// NM_133641                     |
| 447 | Mlh1                     | mutL homolog 1 (E. coli)                                                          | 1.37E-05 | NM_026810                                                    |
| 448 | Sil1                     | endoplasmic reticulum chaperone SIL1 homolog (S. cerevisiae)                      | 1.37E-05 | NM_030749                                                    |
| 449 | Ap1s2                    | adaptor-related protein complex 1, sigma 2 subunit                                | 1.38E-05 | NM_026887                                                    |
| 450 | Thrsp                    | thyroid hormone responsive SPOT14 homolog (Rattus)                                | 1.40E-05 | NM_009381                                                    |
| 451 | Pacsin1                  | protein kinase C and casein kinase substrate in neurons 1                         | 1.40E-05 | NM_011861 /// NM_178365                                      |
| 452 | Ndst3                    | N-deacetylase/N-sulfotransferase (heparan glucosaminyl) 3                         | 1.40E-05 | NM_031186                                                    |
| 453 | Fmn2 /// LOC100044570    | formin 2 /// similar to formin-2                                                  | 1.40E-05 | NM_019445 /// XR_030793                                      |
| 454 | Ncald                    | neurocalcin delta                                                                 | 1.48E-05 | NM_134094                                                    |
| 455 | Ssx2ip                   | synovial sarcoma, X breakpoint 2 interacting protein                              | 1.50E-05 | NM_138744                                                    |
| 456 | Klf9                     | Kruppel-like factor 9                                                             | 1.51E-05 | NM_010638 /// XM_001479552                                   |
| 457 | Papss2                   | 3'-phosphoadenosine 5'-phosphosulfate synthase 2                                  | 1.51E-05 | NM_011864                                                    |

|     |                                                  |                                                                                  |          |                                                                      |
|-----|--------------------------------------------------|----------------------------------------------------------------------------------|----------|----------------------------------------------------------------------|
| 458 | Tmem183a                                         | transmembrane protein 183A                                                       | 1.53E-05 | NM_001042485 /// NM_020588                                           |
| 459 | Fip111                                           | FIP1 like 1 (S. cerevisiae)                                                      | 1.53E-05 | NM_001159573 /// NM_001159574 /// NM_024183                          |
| 460 | Gm2962 /// Uqcrb                                 | predicted gene 2962 /// ubiquinol-cytochrome c reductase binding protein         | 1.55E-05 | NM_026219 /// XM_001475899 /// XM_001480451                          |
| 461 | Wdr45                                            | WD repeat domain 45                                                              | 1.56E-05 | NM_172372                                                            |
| 462 | Ptp1a                                            | protein tyrosine phosphatase-like (proline instead of catalytic arginine), membe | 1.58E-05 | NM_001012396 /// NM_013935                                           |
| 463 | Fndc1                                            | fibronectin type III domain containing 1                                         | 1.60E-05 | NM_001081416                                                         |
| 464 | Mpz12                                            | myelin protein zero-like 2                                                       | 1.61E-05 | NM_007962                                                            |
| 465 | Prmt2                                            | protein arginine N-methyltransferase 2                                           | 1.63E-05 | NM_001077638 /// NM_133182                                           |
| 466 | Serping1                                         | serine (or cysteine) peptidase inhibitor, clade G, member 1                      | 1.65E-05 | NM_009776                                                            |
| 467 | Serpinh1                                         | serine (or cysteine) peptidase inhibitor, clade H, member 1                      | 1.68E-05 | NM_001111043 /// NM_001111044 /// NM_009825                          |
| 468 | Tgfb1                                            | transforming growth factor, beta induced                                         | 1.68E-05 | NM_009369                                                            |
| 469 | Map4k4                                           | mitogen-activated protein kinase kinase kinase kinase 4                          | 1.70E-05 | NM_008696                                                            |
| 470 | Ccng2                                            | cyclin G2                                                                        | 1.70E-05 | NM_007635                                                            |
| 471 | Ndufb3                                           | NADH dehydrogenase (ubiquinone) 1 beta subcomplex 3                              | 1.71E-05 | NM_025597                                                            |
| 472 | Lyz1                                             | lysozyme 1                                                                       | 1.74E-05 | NM_013590                                                            |
| 473 | Col14a1                                          | collagen, type XIV, alpha 1                                                      | 1.74E-05 | NM_181277                                                            |
| 474 | Cklf                                             | chemokine-like factor                                                            | 1.75E-05 | NM_001037841 /// NM_029295                                           |
| 475 | Gpr177                                           | G protein-coupled receptor 177                                                   | 1.77E-05 | NM_026582                                                            |
| 476 | Baz2b                                            | bromodomain adjacent to zinc finger domain, 2B                                   | 1.77E-05 | NM_001001182                                                         |
| 477 | Dst                                              | dystonin                                                                         | 1.78E-05 | NM_133833 /// NM_134448                                              |
| 478 | Hey2                                             | hairly/enhancer-of-split related with YRPW motif 2                               | 1.79E-05 | NM_013904                                                            |
| 479 | Lxn                                              | latexin                                                                          | 1.81E-05 | NM_016753                                                            |
| 480 | Rab32                                            | RAB32, member RAS oncogene family                                                | 1.81E-05 | NM_026405                                                            |
| 481 | Gpr137b /// Gpr137b-ps /// LOC100045567 /// Pnp1 | G protein-coupled receptor 137B /// G protein-coupled receptor 137B, pseudogene  | 1.82E-05 | NM_031999 /// NR_003568 /// XM_001473441 /// XR_001658               |
| 482 | LOC100045567 /// Pnp1                            | similar to purine nucleoside phosphorylase /// purine-nucleoside phosphorylase 1 | 1.82E-05 | NM_013632 /// XM_001474536                                           |
| 483 | Hmgn3                                            | high mobility group nucleosomal binding domain 3                                 | 1.82E-05 | NM_026122 /// NM_175074                                              |
| 484 | Inpp5k                                           | inositol polyphosphate 5-phosphatase K                                           | 1.83E-05 | NM_008916                                                            |
| 485 | Akr1b3                                           | aldo-keto reductase family 1, member B3 (aldose reductase)                       | 1.84E-05 | NM_009658                                                            |
| 486 | Ak3                                              | adenylate kinase 3                                                               | 1.85E-05 | NM_021299                                                            |
| 487 | Gm5529 /// Gm5560 /// Gm64                       | predicted gene 5529 /// predicted gene 5560 /// predicted gene 6425 /// predi    | 1.85E-05 | NM_001081233 /// NM_007451 /// XM_484885 /// XM_887851 /// XM_904056 |
| 488 | Tcf12                                            | transcription factor 12                                                          | 1.86E-05 | NM_011544                                                            |
| 489 | Hdc                                              | histidine decarboxylase                                                          | 1.86E-05 | NM_008230                                                            |
| 490 | Osbp                                             | oxysterol binding protein                                                        | 1.86E-05 | NM_001033174                                                         |
| 491 | Ephx1                                            | epoxide hydrolase 1, microsomal                                                  | 1.88E-05 | NM_010145                                                            |
| 492 | Cdc42                                            | cell division cycle 42 homolog (S. cerevisiae)                                   | 1.89E-05 | NM_009861                                                            |
| 493 | Slk                                              | STE20-like kinase (yeast)                                                        | 1.89E-05 | NM_009289                                                            |
| 494 | Fam100a                                          | family with sequence similarity 100, member A                                    | 1.90E-05 | NM_145359 /// XM_622593 /// XM_974374                                |
| 495 | Procr                                            | protein C receptor, endothelial                                                  | 1.91E-05 | NM_011171                                                            |
| 496 | Ifi47                                            | interferon gamma inducible protein 47                                            | 1.92E-05 | NM_008330                                                            |
| 497 | Ttyh2                                            | tweety homolog 2 (Drosophila)                                                    | 1.92E-05 | NM_053273                                                            |
| 498 | Gm10191 /// Gm16382 /// Gm1                      | predicted gene 10191 /// ribosomal protein L31 pseudogene /// predicted gene 768 | 1.93E-05 | NM_053257 /// XM_001473217 /// XM_001478009 /// XM_001478288 /// XM  |
| 499 | Rab3d                                            | RAB3D, member RAS oncogene family                                                | 1.94E-05 | NM_031874                                                            |
| 500 | Aldh1a1                                          | aldehyde dehydrogenase family 1, subfamily A1                                    | 1.96E-05 | NM_013467                                                            |
| 501 | Pdkk                                             | pyridoxal (pyridoxine, vitamin B6) kinase                                        | 1.97E-05 | NM_172134                                                            |
| 502 | Nrp1                                             | neuropilin 1                                                                     | 1.97E-05 | NM_008737                                                            |
| 503 | Mrps25                                           | mitochondrial ribosomal protein S25                                              | 1.98E-05 | NM_025578                                                            |

|     |                                 |                                                                                  |          |                                                                      |
|-----|---------------------------------|----------------------------------------------------------------------------------|----------|----------------------------------------------------------------------|
| 504 | Cd59a                           | CD59a antigen                                                                    | 1.98E-05 | NM_001111060 /// NM_007652                                           |
| 505 | Azi2                            | 5-azacytidine induced gene 2                                                     | 2.02E-05 | NM_001048146 /// NM_013727                                           |
| 506 | Ptpn9                           | protein tyrosine phosphatase, non-receptor type 9                                | 2.02E-05 | NM_019651                                                            |
| 507 | Ypel3                           | yippee-like 3 (Drosophila)                                                       | 2.06E-05 | NM_025347 /// NM_026875                                              |
| 508 | Slc7a4                          | solute carrier family 7 (cationic amino acid transporter, y+ system), member 4   | 2.06E-05 | NM_144852                                                            |
| 509 | Cxcl5                           | chemokine (C-X-C motif) ligand 5                                                 | 2.07E-05 | NM_009141                                                            |
| 510 | Sh3d19                          | SH3 domain protein D19                                                           | 2.08E-05 | NM_001082414                                                         |
| 511 | Serpnb6b                        | serine (or cysteine) peptidase inhibitor, clade B, member 6b                     | 2.10E-05 | NM_011454                                                            |
| 512 | Itm2c                           | integral membrane protein 2C                                                     | 2.12E-05 | NM_022417                                                            |
| 513 | Ctsh                            | cathepsin H                                                                      | 2.13E-05 | NM_007801                                                            |
| 514 | Usp10                           | ubiquitin specific peptidase 10                                                  | 2.14E-05 | NM_009462                                                            |
| 515 | Folr2                           | folate receptor 2 (fetal)                                                        | 2.15E-05 | NM_008035                                                            |
| 516 | Lcn2                            | lipocalin 2                                                                      | 2.18E-05 | NM_008491                                                            |
| 517 | Csf1r                           | colony stimulating factor 1 receptor                                             | 2.20E-05 | NM_001037859                                                         |
| 518 | Vegfc                           | vascular endothelial growth factor C                                             | 2.22E-05 | NM_009506                                                            |
| 519 | C2                              | complement component 2 (within H-2S)                                             | 2.23E-05 | NM_013484                                                            |
| 520 | Cds2                            | CDP-diacylglycerol synthase (phosphatidate cytidyltransferase) 2                 | 2.23E-05 | NM_138651                                                            |
| 521 | Sepp1                           | selenoprotein P, plasma, 1                                                       | 2.23E-05 | NM_001042613 /// NM_001042614 /// NM_009155                          |
| 522 | C130026I21RIK /// LOC100041     | RIKEN cDNA C130026I21 gene /// similar to C130026I21Rik protein                  | 2.25E-05 | NM_001037909 /// NM_175219 /// XM_001477693                          |
| 523 | 4922501L14RIK                   | RIKEN cDNA 4922501L14 gene                                                       | 2.25E-05 | NM_175176 /// XM_001481326 /// XR_032207                             |
| 524 | Anxa4                           | annexin A4                                                                       | 2.30E-05 | NM_013471                                                            |
| 525 | Kdr                             | kinase insert domain protein receptor                                            | 2.34E-05 | NM_010612                                                            |
| 526 | Usp19                           | ubiquitin specific peptidase 19                                                  | 2.34E-05 | NM_027804                                                            |
| 527 | Loxl1                           | lysyl oxidase-like 1                                                             | 2.35E-05 | NM_010729                                                            |
| 528 | Aldoa /// Aldoart1              | aldolase A, fructose-bisphosphate /// aldolase 1, A isoform, retrogene 1         | 2.39E-05 | NM_007438                                                            |
| 529 | Itsn2                           | intersectin 2                                                                    | 2.48E-05 | NM_011365                                                            |
| 530 | Bbs2                            | Bardet-Biedl syndrome 2 (human)                                                  | 2.53E-05 | NM_026116                                                            |
| 531 | Ywhaq                           | tyrosine 3-monooxygenase/tryptophan 5-monooxygenase activation protein, theta p  | 2.53E-05 | NM_0111739                                                           |
| 532 | Smarcc1                         | SWI/SNF related, matrix associated, actin dependent regulator of chromatin, subf | 2.53E-05 | NM_009211                                                            |
| 533 | Slco2a1                         | solute carrier organic anion transporter family, member 2a1                      | 2.57E-05 | NM_033314                                                            |
| 534 | Ergic3                          | ERGIC and golgi 3                                                                | 2.58E-05 | NM_025516                                                            |
| 535 | Igh /// Igh-2 /// Igh-VJ558 /// | immunoglobulin heavy chain complex /// immunoglobulin heavy chain 2 (serum IgA   | 2.61E-05 | ---                                                                  |
| 536 | Pvr                             | poliovirus receptor                                                              | 2.61E-05 | NM_027514                                                            |
| 537 | Egr1                            | early growth response 1                                                          | 2.66E-05 | NM_007913                                                            |
| 538 | Nnmt                            | nicotinamide N-methyltransferase                                                 | 2.69E-05 | NM_010924                                                            |
| 539 | Plxnc1                          | plexin C1                                                                        | 2.69E-05 | NM_018797                                                            |
| 540 | Ttg                             | Trk-fused gene                                                                   | 2.71E-05 | NM_019678                                                            |
| 541 | 2310003F16RIK                   | RIKEN cDNA 2310003F16 gene                                                       | 2.75E-05 | NM_026318                                                            |
| 542 | Slc30a4                         | solute carrier family 30 (zinc transporter), member 4                            | 2.78E-05 | NM_011174                                                            |
| 543 | Utrn                            | utrophin                                                                         | 2.80E-05 | NM_011682                                                            |
| 544 | Ski                             | ski sarcoma viral oncogene homolog (avian)                                       | 2.80E-05 | NM_011385                                                            |
| 545 | 1110032E23RIK                   | RIKEN cDNA 1110032E23 gene                                                       | 2.82E-05 | NM_133187                                                            |
| 546 | Ank                             | progressive ankylosis                                                            | 2.85E-05 | NM_020332                                                            |
| 547 | Gpatch8                         | G patch domain containing 8                                                      | 2.85E-05 | NM_001159492 /// XM_152907 /// XM_895150 /// XM_903059 /// XM_903060 |
| 548 | Inpp1                           | inositol polyphosphate-1-phosphatase                                             | 2.86E-05 | NM_008384                                                            |
| 549 | Flt1                            | FMS-like tyrosine kinase 1                                                       | 2.87E-05 | NM_010228                                                            |

|     |                        |                                                                                  |          |                                                              |
|-----|------------------------|----------------------------------------------------------------------------------|----------|--------------------------------------------------------------|
| 550 | Smarca5                | SWI/SNF related, matrix associated, actin dependent regulator of chromatin, subf | 2.92E-05 | NM_053124                                                    |
| 551 | Lima1                  | LIM domain and actin binding 1                                                   | 2.92E-05 | NM_001113545 /// NM_023063                                   |
| 552 | Rpl23                  | ribosomal protein L23                                                            | 2.93E-05 | NM_022891                                                    |
| 553 | Bcl2l11                | BCL2-like 11 (apoptosis facilitator)                                             | 2.94E-05 | NM_009754 /// NM_207680 /// NM_207681                        |
| 554 | Pnrc2                  | proline-rich nuclear receptor coactivator 2                                      | 2.95E-05 | NM_026383                                                    |
| 555 | Cat                    | catalase                                                                         | 2.96E-05 | NM_009804                                                    |
| 556 | Hspa4                  | heat shock protein 4                                                             | 2.97E-05 | NM_008300                                                    |
| 557 | Alg14                  | asparagine-linked glycosylation 14 homolog (yeast)                               | 2.99E-05 | NM_024178                                                    |
| 558 | ---                    | ---                                                                              | 3.01E-05 | ---                                                          |
| 559 | Lamp1                  | lysosomal-associated membrane protein 1                                          | 3.01E-05 | NM_010684                                                    |
| 560 | Ppap2b                 | phosphatidic acid phosphatase type 2B                                            | 3.02E-05 | NM_080555                                                    |
| 561 | Gsn                    | gelsolin                                                                         | 3.04E-05 | NM_146120                                                    |
| 562 | Agl                    | amylase-1,6-glycosidase, 4-alpha-glucanotransferase                              | 3.05E-05 | NM_001081326                                                 |
| 563 | Cbx3                   | chromobox homolog 3 (Drosophila HP1 gamma)                                       | 3.10E-05 | NM_007624                                                    |
| 564 | Fez2                   | fasciculation and elongation protein zeta 2 (zygin II)                           | 3.10E-05 | NM_199448                                                    |
| 565 | Inadl                  | InaD-like (Drosophila)                                                           | 3.12E-05 | NM_001005784 /// NM_001005787 /// NM_007704 /// NM_172696    |
| 566 | Gadd45b                | Growth arrest and DNA-damage-inducible 45 beta                                   | 3.17E-05 | NM_008655                                                    |
| 567 | Cldn7                  | claudin 7                                                                        | 3.17E-05 | NM_016887                                                    |
| 568 | Sh3bgr1                | SH3-binding domain glutamic acid-rich protein like                               | 3.18E-05 | NM_019989                                                    |
| 569 | Clec4d                 | C-type lectin domain family 4, member d                                          | 3.19E-05 | NM_001163161 /// NM_010819                                   |
| 570 | Ndrp1                  | N-myc downstream regulated gene 1                                                | 3.23E-05 | NM_008681                                                    |
| 571 | Car3                   | carbonic anhydrase 3                                                             | 3.23E-05 | NM_007606                                                    |
| 572 | Ick                    | intestinal cell kinase                                                           | 3.25E-05 | NM_001163780 /// NM_019987                                   |
| 573 | Abcf3                  | ATP-binding cassette, sub-family F (GCN20), member 3                             | 3.26E-05 | NM_013852                                                    |
| 574 | Ptpro                  | protein tyrosine phosphatase, receptor type, O                                   | 3.28E-05 | NM_001164401 /// NM_001164402 /// NM_001164403 /// NM_011216 |
| 575 | Fdx1                   | ferredoxin 1                                                                     | 3.29E-05 | NM_007996                                                    |
| 576 | Otrt1                  | queuine tRNA-ribosyltransferase 1                                                | 3.32E-05 | NM_021888                                                    |
| 577 | Eps8                   | epidermal growth factor receptor pathway substrate 8                             | 3.32E-05 | NM_007945                                                    |
| 578 | Daglb                  | diacylglycerol lipase, beta                                                      | 3.39E-05 | NM_144915                                                    |
| 579 | Fam20c                 | family with sequence similarity 20, member C                                     | 3.43E-05 | NM_030565                                                    |
| 580 | Evi5                   | ecotropic viral integration site 5                                               | 3.43E-05 | NM_007964                                                    |
| 581 | Ndufa3                 | NADH dehydrogenase (ubiquinone) 1 alpha subcomplex, 3                            | 3.46E-05 | NM_025348                                                    |
| 582 | Lipg                   | lipase, endothelial                                                              | 3.47E-05 | NM_010720                                                    |
| 583 | Ppib                   | peptidylprolyl isomerase B                                                       | 3.49E-05 | NM_011149                                                    |
| 584 | Reep3                  | receptor accessory protein 3                                                     | 3.51E-05 | NM_178606                                                    |
| 585 | Kdm2b                  | lysine (K)-specific demethylase 2B                                               | 3.51E-05 | NM_001003953 /// NM_001005866 /// NM_013910                  |
| 586 | Dusp12                 | Dual specificity phosphatase 12                                                  | 3.52E-05 | NM_023173                                                    |
| 587 | LOC100047840 /// Stap1 | similar to stem cell adaptor protein STAP-1 /// signal transducing adaptor famil | 3.55E-05 | NM_019992 /// XM_001479407 /// XM_001479415                  |
| 588 | Dpp8                   | dipeptidylpeptidase 8                                                            | 3.59E-05 | NM_028906                                                    |
| 589 | Tmem106b               | transmembrane protein 106B                                                       | 3.61E-05 | NM_027992                                                    |
| 590 | Uxs1                   | UDP-glucuronate decarboxylase 1                                                  | 3.63E-05 | NM_026430                                                    |
| 591 | Abhd14a                | abhydrolase domain containing 14A                                                | 3.63E-05 | NM_001110271 /// NM_001110272 /// NM_145919                  |
| 592 | Rgs2                   | regulator of G-protein signaling 2                                               | 3.64E-05 | NM_009061                                                    |
| 593 | Cdh10                  | cadherin 10                                                                      | 3.68E-05 | NM_009865                                                    |
| 594 | Tmem45a                | transmembrane protein 45a                                                        | 3.69E-05 | NM_019631                                                    |
| 595 | Gpr19                  | G protein-coupled receptor 19                                                    | 3.72E-05 | NM_008157                                                    |

|     |                                 |                                                                                                                                                      |          |                                                              |
|-----|---------------------------------|------------------------------------------------------------------------------------------------------------------------------------------------------|----------|--------------------------------------------------------------|
| 596 | Traf4                           | TNF receptor associated factor 4                                                                                                                     | 3.73E-05 | NM_009423                                                    |
| 597 | Seh1l                           | SEH1-like (S. cerevisiae)                                                                                                                            | 3.78E-05 | NM_001039088 /// NM_028112                                   |
| 598 | Dclk1                           | doublecortin-like kinase 1                                                                                                                           | 3.81E-05 | NM_001111051 /// NM_001111052 /// NM_001111053 /// NM_019978 |
| 599 | Tjp1                            | tight junction protein 1                                                                                                                             | 3.81E-05 | NM_001163574 /// NM_009386                                   |
| 600 | Hfe                             | hemochromatosis                                                                                                                                      | 3.83E-05 | NM_010424                                                    |
| 601 | Rspo1                           | R-spondin homolog (Xenopus laevis)                                                                                                                   | 3.83E-05 | NM_138683                                                    |
| 602 | Lipa                            | lysosomal acid lipase A                                                                                                                              | 3.92E-05 | NM_001111100 /// NM_021460                                   |
| 603 | Egr2                            | early growth response 2                                                                                                                              | 4.02E-05 | NM_010118                                                    |
| 604 | Itgav                           | integrin alpha V                                                                                                                                     | 4.04E-05 | NM_008402                                                    |
| 605 | Ip6k1                           | inositol hexaphosphate kinase 1                                                                                                                      | 4.05E-05 | NM_013785                                                    |
| 606 | Jund                            | Jun proto-oncogene related gene d                                                                                                                    | 4.07E-05 | NM_010592                                                    |
| 607 | Igfbp3                          | insulin-like growth factor binding protein 3                                                                                                         | 4.12E-05 | NM_008343                                                    |
| 608 | Adam8                           | alpha disintegrin and metallopeptidase domain 8                                                                                                      | 4.15E-05 | NM_007403                                                    |
| 609 | Tnfrsf13c                       | tumor necrosis factor receptor superfamily, member 13c                                                                                               | 4.15E-05 | NM_028075                                                    |
| 610 | Igf2r                           | insulin-like growth factor 2 receptor                                                                                                                | 4.20E-05 | NM_010515                                                    |
| 611 | Bcl2a1a /// Bcl2a1b /// Bcl2a1c | B-cell leukemia/lymphoma 2 related protein A1a /// B-cell leukemia/lymphoma 2 related protein A1b /// B-cell leukemia/lymphoma 2 related protein A1c | 4.25E-05 | NM_007534 /// NM_007536 /// NM_009742                        |
| 612 | Ndufa3                          | NADH dehydrogenase (ubiquinone) 1 alpha subcomplex, 3                                                                                                | 4.27E-05 | NM_025348                                                    |
| 613 | Cacna1g                         | calcium channel, voltage-dependent, T type, alpha 1G subunit                                                                                         | 4.27E-05 | NM_001112813 /// NM_009783                                   |
| 614 | Vprbp                           | Vpr (HIV-1) binding protein                                                                                                                          | 4.29E-05 | NM_001015507                                                 |
| 615 | Plk3cg                          | phosphoinositide-3-kinase, catalytic, gamma polypeptide                                                                                              | 4.32E-05 | NM_001146200 /// NM_001146201 /// NM_020272                  |
| 616 | Frdm4b                          | FERM domain containing 4B                                                                                                                            | 4.34E-05 | NM_145148                                                    |
| 617 | Pnkd                            | paroxysmal nonkinesinogenic dyskinesia                                                                                                               | 4.35E-05 | NM_001039509 /// NM_019999 /// NM_025580                     |
| 618 | Ccpg1                           | cell cycle progression 1                                                                                                                             | 4.35E-05 | NM_001114328 /// NM_028181                                   |
| 619 | Csn3                            | casein kappa                                                                                                                                         | 4.42E-05 | NM_007786                                                    |
| 620 | Epm2aip1                        | EPM2A (laforin) interacting protein 1                                                                                                                | 4.44E-05 | NM_175266                                                    |
| 621 | Scel                            | sciellin                                                                                                                                             | 4.49E-05 | NM_022886                                                    |
| 622 | Ssb                             | Sjogren syndrome antigen B                                                                                                                           | 4.53E-05 | NM_001110145 /// NM_009278                                   |
| 623 | Csrp2                           | cysteine and glycine-rich protein 2                                                                                                                  | 4.59E-05 | NM_007792                                                    |
| 624 | Zeb2                            | zinc finger E-box binding homeobox 2                                                                                                                 | 4.60E-05 | NM_015753                                                    |
| 625 | Dap                             | death-associated protein                                                                                                                             | 4.64E-05 | NM_146057                                                    |
| 626 | Snx5                            | sorting nexin 5                                                                                                                                      | 4.65E-05 | NM_024225                                                    |
| 627 | Clec4a2                         | C-type lectin domain family 4, member a2                                                                                                             | 4.66E-05 | NM_011999                                                    |
| 628 | Sirpa                           | signal-regulatory protein alpha                                                                                                                      | 4.67E-05 | NM_007547                                                    |
| 629 | Npl                             | N-acetylneuraminidase                                                                                                                                | 4.69E-05 | NM_028749                                                    |
| 630 | Aldoa                           | aldolase A, fructose-bisphosphate                                                                                                                    | 4.71E-05 | NM_007438                                                    |
| 631 | Egr2                            | early growth response 2                                                                                                                              | 4.73E-05 | NM_010118                                                    |
| 632 | Fads3                           | fatty acid desaturase 3                                                                                                                              | 4.74E-05 | NM_021890                                                    |
| 633 | Rnf7                            | ring finger protein 7                                                                                                                                | 4.76E-05 | NM_011279                                                    |
| 634 | Map2k7                          | mitogen-activated protein kinase kinase 7                                                                                                            | 4.77E-05 | NM_001042557 /// NM_001164172 /// NM_011944                  |
| 635 | Spry2                           | sprouty homolog 2 (Drosophila)                                                                                                                       | 4.78E-05 | NM_011897                                                    |
| 636 | Endod1                          | endonuclease domain containing 1                                                                                                                     | 4.79E-05 | NM_028013                                                    |
| 637 | Nupl1                           | nucleoporin like 1                                                                                                                                   | 4.88E-05 | NM_170591                                                    |
| 638 | Arhgap6                         | Rho GTPase activating protein 6                                                                                                                      | 4.93E-05 | NM_009707 /// NM_178754                                      |
| 639 | Fam129b                         | family with sequence similarity 129, member B                                                                                                        | 4.94E-05 | NM_146119                                                    |
| 640 | Atplf1                          | ATPase inhibitory factor 1                                                                                                                           | 4.96E-05 | NM_007512                                                    |
| 641 | Irf2bp1                         | interferon regulatory factor 2 binding protein 1                                                                                                     | 4.97E-05 | NM_178757                                                    |

|     |                    |                                                                                  |          |                                                                     |
|-----|--------------------|----------------------------------------------------------------------------------|----------|---------------------------------------------------------------------|
| 642 | Spon2              | spondin 2, extracellular matrix protein                                          | 4.99E-05 | NM_133903                                                           |
| 643 | Eps8 /// LOC632638 | epidermal growth factor receptor pathway substrate 8 /// similar to Epidermal gr | 5.03E-05 | NM_007945 /// XR_031552                                             |
| 644 | Tnfaip2            | tumor necrosis factor, alpha-induced protein 2                                   | 5.06E-05 | NM_009396                                                           |
| 645 | Kctd20             | potassium channel tetramerisation domain containing 20                           | 5.07E-05 | NM_025888                                                           |
| 646 | Pcbp4              | poly(rC) binding protein 4                                                       | 5.08E-05 | NM_021567                                                           |
| 647 | Pvrl4              | poliovirus receptor-related 4                                                    | 5.10E-05 | NM_001122680 /// NM_027893                                          |
| 648 | ---                | ---                                                                              | 5.14E-05 | ---                                                                 |
| 649 | Rgs3               | regulator of G-protein signaling 3                                               | 5.17E-05 | NM_001081650 /// NM_019492 /// NM_134257                            |
| 650 | Figf               | c-fos induced growth factor                                                      | 5.26E-05 | NM_010216                                                           |
| 651 | Bhlhe41            | basic helix-loop-helix family, member e41                                        | 5.28E-05 | NM_024469                                                           |
| 652 | Pigp               | phosphatidylinositol glycan anchor biosynthesis, class P                         | 5.29E-05 | NM_001159616 /// NM_001159617 /// NM_001159618 /// NM_001159619 /// |
| 653 | ---                | ---                                                                              | 5.33E-05 | ---                                                                 |
| 654 | Tsc22d1            | TSC22 domain family, member 1                                                    | 5.36E-05 | NM_009366 /// NM_207652                                             |
| 655 | Rhbf1              | rhomboid family 1 (Drosophila)                                                   | 5.36E-05 | NM_010117                                                           |
| 656 | Gm4204 /// Nap11   | predicted gene 4204 /// nucleosome assembly protein 1-like 1                     | 5.42E-05 | NM_001146707 /// NM_015781 /// XR_034434                            |
| 657 | Wbscr27            | Williams Beuren syndrome chromosome region 27 (human)                            | 5.42E-05 | NM_024479                                                           |
| 658 | Palld              | palladin, cytoskeletal associated protein                                        | 5.44E-05 | NM_001081390                                                        |
| 659 | Bcl3               | B-cell leukemia/lymphoma 3                                                       | 5.44E-05 | NM_033601                                                           |
| 660 | Tacc2              | transforming, acidic coiled-coil containing protein 2                            | 5.46E-05 | NM_001004468 /// NM_021314 /// NM_206856                            |
| 661 | Ints7              | integrator complex subunit 7                                                     | 5.47E-05 | NM_178632                                                           |
| 662 | Pdzrn3             | PDZ domain containing RING finger 3                                              | 5.47E-05 | NM_018884                                                           |
| 663 | Igfbp6             | insulin-like growth factor binding protein 6                                     | 5.49E-05 | NM_008344                                                           |
| 664 | Lasp1              | LIM and SH3 protein 1                                                            | 5.53E-05 | NM_010688                                                           |
| 665 | Pou6f1             | POU domain, class 6, transcription factor 1                                      | 5.56E-05 | NM_010127                                                           |
| 666 | Ccl12              | chemokine (C-C motif) ligand 12                                                  | 5.59E-05 | NM_011331                                                           |
| 667 | Dyrk1a             | dual-specificity tyrosine-(Y)-phosphorylation regulated kinase 1a                | 5.59E-05 | NM_001113389 /// NM_007890                                          |
| 668 | Sms                | spermine synthase                                                                | 5.62E-05 | NM_009214                                                           |
| 669 | Igfbp4             | insulin-like growth factor binding protein 4                                     | 5.62E-05 | NM_010517                                                           |
| 670 | S100a4             | S100 calcium binding protein A4                                                  | 5.63E-05 | NM_011311                                                           |
| 671 | Uhrf1bp1l          | UHRF1 (ICBP90) binding protein 1-like                                            | 5.65E-05 | NM_029166                                                           |
| 672 | Dclre1b            | DNA cross-link repair 1B, PSO2 homolog (S. cerevisiae)                           | 5.71E-05 | NM_001025312 /// NM_133865                                          |
| 673 | Pip4k2a            | phosphatidylinositol-5-phosphate 4-kinase, type II, alpha                        | 5.72E-05 | NM_008845                                                           |
| 674 | Dnaja1             | DnaJ (Hsp40) homolog, subfamily A, member 1                                      | 5.73E-05 | NM_008298                                                           |
| 675 | Rbm43              | RNA binding motif protein 43                                                     | 5.76E-05 | NM_001141981 /// NM_001141982 /// NM_030243                         |
| 676 | Rap2b              | RAP2B, member of RAS oncogene family                                             | 5.80E-05 | NM_028712                                                           |
| 677 | Adss1              | adenylosuccinate synthetase like 1                                               | 5.80E-05 | NM_007421                                                           |
| 678 | Mapre2             | microtubule-associated protein, RP/EB family, member 2                           | 5.84E-05 | NM_001162941 /// NM_001162942 /// NM_153058                         |
| 679 | Litaf              | LPS-induced TN factor                                                            | 5.84E-05 | NM_019980                                                           |
| 680 | Cd46               | CD46 antigen, complement regulatory protein                                      | 5.88E-05 | NM_010778                                                           |
| 681 | Timp2              | tissue inhibitor of metalloproteinase 2                                          | 5.88E-05 | NM_011594                                                           |
| 682 | Aebp1              | AE binding protein 1                                                             | 5.96E-05 | NM_009636                                                           |
| 683 | Plbd2              | phospholipase B domain containing 2                                              | 5.96E-05 | NM_023625                                                           |
| 684 | Bbc3               | BCL2 binding component 3                                                         | 5.98E-05 | NM_133234                                                           |
| 685 | Vcl                | vinculin                                                                         | 5.99E-05 | NM_009502                                                           |
| 686 | Gas1               | growth arrest specific 1                                                         | 6.01E-05 | NM_008086                                                           |
| 687 | Epha8              | Eph receptor A8                                                                  | 6.11E-05 | NM_007939                                                           |

|     |                                 |                                                                                  |          |                                                                      |
|-----|---------------------------------|----------------------------------------------------------------------------------|----------|----------------------------------------------------------------------|
| 688 | Ok                              | quaking                                                                          | 6.13E-05 | NM_001159516 /// NM_001159517 /// NM_021881                          |
| 689 | Ttc17                           | tetratricopeptide repeat domain 17                                               | 6.13E-05 | NM_183106                                                            |
| 690 | Serpinh1                        | serine (or cysteine) peptidase inhibitor, clade H, member 1                      | 6.14E-05 | NM_001111043 /// NM_001111044 /// NM_009825                          |
| 691 | Il1r1                           | interleukin 1 receptor, type I                                                   | 6.19E-05 | NM_001123382 /// NM_008362                                           |
| 692 | Arl4c /// LOC632433             | ADP-ribosylation factor-like 4C /// similar to ADP-ribosylation factor-like prot | 6.26E-05 | NM_177305 /// XM_906533                                              |
| 693 | Impa2                           | inositol (myo)-1(or 4)-monophosphatase 2                                         | 6.30E-05 | NM_053261                                                            |
| 694 | Adcy7                           | adenylate cyclase 7                                                              | 6.33E-05 | NM_001037723 /// NM_001037724 /// NM_001109756 /// NM_007406         |
| 695 | Sema4d                          | sema domain, immunoglobulin domain (Ig), transmembrane domain (TM) and short     | 6.34E-05 | NM_013660                                                            |
| 696 | Snrpe                           | small nuclear ribonucleoprotein E                                                | 6.37E-05 | NM_009227                                                            |
| 697 | Dnase1l1                        | deoxyribonuclease 1-like 1                                                       | 6.47E-05 | NM_027109                                                            |
| 698 | Cbr1                            | carbonyl reductase 1                                                             | 6.49E-05 | NM_007620                                                            |
| 699 | Taf13                           | TAF13 RNA polymerase II, TATA box binding protein (TBP)-associated factor        | 6.56E-05 | NM_025444                                                            |
| 700 | Chi3l1                          | chitinase 3-like 1                                                               | 6.57E-05 | NM_007695                                                            |
| 701 | Fam3c                           | family with sequence similarity 3, member C                                      | 6.59E-05 | NM_138587                                                            |
| 702 | Atf2                            | activating transcription factor 2                                                | 6.60E-05 | NM_001025093 /// NM_009715                                           |
| 703 | Abcc5                           | ATP-binding cassette, sub-family C (CFTR/MRP), member 5                          | 6.62E-05 | NM_013790 /// NM_176839                                              |
| 704 | Ifitm3                          | interferon induced transmembrane protein 3                                       | 6.67E-05 | NM_025378                                                            |
| 705 | Gm11285 /// Gm14173 /// Gm      | predicted gene 11285 /// predicted gene 14173 /// predicted gene 14251 /// predi | 6.69E-05 | NM_009084 /// XM_001004924 /// XM_001474747 /// XM_001475113 /// XM  |
| 706 | Cfd                             | complement factor D (adipsin)                                                    | 6.70E-05 | NM_013459                                                            |
| 707 | Stard8                          | START domain containing 8                                                        | 6.71E-05 | NM_199018                                                            |
| 708 | Prdx1                           | peroxiredoxin 1                                                                  | 6.73E-05 | NM_011034                                                            |
| 709 | Cdc73                           | cell division cycle 73, Paf1/RNA polymerase II complex component, homolog (S. ce | 6.73E-05 | NM_145991                                                            |
| 710 | Prrx1                           | paired related homeobox 1                                                        | 6.80E-05 | NM_001025570 /// NM_011127 /// NM_175686                             |
| 711 | Clec14a                         | C-type lectin domain family 14, member a                                         | 6.83E-05 | NM_025809                                                            |
| 712 | Mxi1                            | Max interacting protein 1                                                        | 6.85E-05 | NM_001008542 /// NM_001008543 /// NM_010847                          |
| 713 | Cdh1                            | cadherin 1                                                                       | 6.86E-05 | NM_009864                                                            |
| 714 | Pla2g4a                         | phospholipase A2, group IVA (cytosolic, calcium-dependent)                       | 6.96E-05 | NM_008869                                                            |
| 715 | Lrrc48                          | leucine rich repeat containing 48                                                | 7.00E-05 | NM_029044                                                            |
| 716 | Hist1h3a /// Hist1h3b /// Hist1 | histone cluster 1, H3a /// histone cluster 1, H3b /// histone cluster 1, H3c /// | 7.00E-05 | NM_013548 /// NM_013550 /// NM_019469 /// NM_054045 /// NM_145073 // |
| 717 | Wnt10a                          | wingless related MMTV integration site 10a                                       | 7.06E-05 | NM_009518                                                            |
| 718 | Lrrflp1                         | leucine rich repeat (in FLII) interacting protein 1                              | 7.09E-05 | NM_001111311 /// NM_001111312 /// NM_008515                          |
| 719 | LOC676870 /// Pbx1              | region containing RIKEN cDNA 2310056B04 gene; pre B-cell leukemia transcription  | 7.10E-05 | NM_008783 /// NM_183355 /// XM_001003209                             |
| 720 | Enpep                           | glutamyl aminopeptidase                                                          | 7.12E-05 | NM_007934                                                            |
| 721 | Btg1 /// LOC100047353           | B-cell translocation gene 1, anti-proliferative /// similar to myocardial vascul | 7.14E-05 | NM_007569 /// XM_001477963                                           |
| 722 | Ctsw                            | cathepsin W                                                                      | 7.17E-05 | NM_009985                                                            |
| 723 | Slc15a2                         | solute carrier family 15 (H+/peptide transporter), member 2                      | 7.22E-05 | NM_001145899 /// NM_021301                                           |
| 724 | Wdr6                            | WD repeat domain 6                                                               | 7.23E-05 | NM_031392                                                            |
| 725 | Rbbp7                           | retinoblastoma binding protein 7                                                 | 7.24E-05 | NM_009031                                                            |
| 726 | Dab2                            | disabled homolog 2 (Drosophila)                                                  | 7.32E-05 | NM_001008702 /// NM_001037905 /// NM_001102400 /// NM_023118         |
| 727 | Ptpre                           | protein tyrosine phosphatase, receptor type, E                                   | 7.46E-05 | NM_011212                                                            |
| 728 | Ugt1a1 /// Ugt1a10 /// Ugt1a2   | UDP glucuronosyltransferase 1 family, polypeptide A1 /// UDP glycosyltransferase | 7.55E-05 | NM_013701 /// NM_145079 /// NM_201410 /// NM_201641 /// NM_201642 // |
| 729 | Plod2                           | procollagen lysine, 2-oxoglutarate 5-dioxygenase 2                               | 7.59E-05 | NM_001142916 /// NM_011961                                           |
| 730 | Btg1 /// LOC100047353           | B-cell translocation gene 1, anti-proliferative /// similar to myocardial vascul | 7.61E-05 | NM_007569 /// XM_001477963                                           |
| 731 | Rnpepl1                         | arginyl aminopeptidase (aminopeptidase B)-like 1                                 | 7.62E-05 | NM_181405                                                            |
| 732 | Podxl                           | podocalyxin-like                                                                 | 7.63E-05 | NM_013723                                                            |
| 733 | LOC100047222 /// LOC676193      | similar to anti-glycoprotein-B of human Cytomegalovirus Immunoglobulin VI chain  | 7.64E-05 | XM_001477680 /// XM_988029                                           |



|     |                             |                                                                                  |          |                                                              |
|-----|-----------------------------|----------------------------------------------------------------------------------|----------|--------------------------------------------------------------|
| 734 | Ncam1                       | neural cell adhesion molecule 1                                                  | 7.72E-05 | NM_001081445 /// NM_001113204 /// NM_010875                  |
| 735 | Slc1a4                      | solute carrier family 1 (glutamate/neutral amino acid transporter), member 4     | 7.74E-05 | NM_018861                                                    |
| 736 | Id2                         | inhibitor of DNA binding 2                                                       | 7.75E-05 | NM_010496                                                    |
| 737 | Ica1                        | islet cell autoantigen 1                                                         | 7.77E-05 | NM_010492                                                    |
| 738 | Lipa                        | lysosomal acid lipase A                                                          | 7.79E-05 | NM_001111100 /// NM_021460                                   |
| 739 | Ebf1                        | early B-cell factor 1                                                            | 7.85E-05 | NM_007897                                                    |
| 740 | Cmtm3 /// LOC100046883      | CKLF-like MARVEL transmembrane domain containing 3 /// similar to CKLF-like MAR  | 7.89E-05 | NM_024217 /// XM_001476984                                   |
| 741 | Trib1                       | tribbles homolog 1 (Drosophila)                                                  | 7.89E-05 | NM_144549                                                    |
| 742 | Hal                         | histidine ammonia lyase                                                          | 7.90E-05 | NM_010401                                                    |
| 743 | Dhrs3                       | dehydrogenase/reductase (SDR family) member 3                                    | 7.93E-05 | NM_011303                                                    |
| 744 | Bmi1                        | Bmi1 polycomb ring finger oncogene                                               | 8.02E-05 | NM_007552                                                    |
| 745 | Mcart1                      | mitochondrial carrier triple repeat 1                                            | 8.02E-05 | NM_001009949                                                 |
| 746 | Adipor1                     | adiponectin receptor 1                                                           | 8.08E-05 | NM_028320                                                    |
| 747 | Grina                       | glutamate receptor, ionotropic, N-methyl D-aspartate-associated protein 1 (gluta | 8.10E-05 | NM_023168                                                    |
| 748 | Cbx8                        | chromobox homolog 8 (Drosophila Pc class)                                        | 8.15E-05 | NM_013926                                                    |
| 749 | Col6a2                      | collagen, type VI, alpha 2                                                       | 8.16E-05 | NM_146007                                                    |
| 750 | Cd59a                       | CD59a antigen                                                                    | 8.19E-05 | NM_001111060 /// NM_007652                                   |
| 751 | Bst1                        | bone marrow stromal cell antigen 1                                               | 8.20E-05 | NM_009763                                                    |
| 752 | Nckap1                      | NCK-associated protein 1                                                         | 8.28E-05 | NM_016965                                                    |
| 753 | Fermt2                      | fermitin family homolog 2 (Drosophila)                                           | 8.31E-05 | NM_146054                                                    |
| 754 | Os9                         | amplified in osteosarcoma                                                        | 8.37E-05 | NM_177614                                                    |
| 755 | Fil1                        | Friend leukemia integration 1                                                    | 8.38E-05 | NM_008026                                                    |
| 756 | Csf2ra                      | colony stimulating factor 2 receptor, alpha, low-affinity (granulocyte-macrophag | 8.40E-05 | NM_009970                                                    |
| 757 | Dnajc28                     | DnaJ (Hsp40) homolog, subfamily C, member 28                                     | 8.48E-05 | NM_001099738 /// NM_138664                                   |
| 758 | Ccdc80                      | coiled-coil domain containing 80                                                 | 8.50E-05 | NM_026439                                                    |
| 759 | Mapk8                       | mitogen-activated protein kinase 8                                               | 8.51E-05 | NM_016700                                                    |
| 760 | Serpnb9g                    | serine (or cysteine) peptidase inhibitor, clade B, member 9g                     | 8.59E-05 | NM_011455                                                    |
| 761 | Rpn1                        | ribophorin 1                                                                     | 8.65E-05 | NM_133933                                                    |
| 762 | Ppt2                        | palmitoyl-protein thioesterase 2                                                 | 8.66E-05 | NM_019441                                                    |
| 763 | Gm6440 /// LOC675813 /// Rp | predicted gene 6440 /// similar to 40S ribosomal protein S20 /// ribosomal prote | 8.68E-05 | NM_026147 /// XM_001475978 /// XM_001480472 /// XR_032773    |
| 764 | Tnfaip8                     | tumor necrosis factor, alpha-induced protein 8                                   | 8.75E-05 | NM_134131                                                    |
| 765 | Ms4a6c                      | membrane-spanning 4-domains, subfamily A, member 6C                              | 8.91E-05 | NM_028595                                                    |
| 766 | Cotl1                       | coactosin-like 1 (Dictyostelium)                                                 | 8.94E-05 | NM_028071                                                    |
| 767 | Fdft1                       | farnesyl diphosphate farnesyl transferase 1                                      | 8.99E-05 | NM_010191                                                    |
| 768 | Epb4.112                    | erythrocyte protein band 4.1-like 2                                              | 9.04E-05 | NM_013511                                                    |
| 769 | Myof                        | myoferlin                                                                        | 9.11E-05 | NM_001099634 /// XM_001480162 /// XM_001480167 /// XM_283556 |
| 770 | Itm2b                       | integral membrane protein 2B                                                     | 9.14E-05 | NM_008410                                                    |
| 771 | Ms4a6b                      | membrane-spanning 4-domains, subfamily A, member 6B                              | 9.15E-05 | NM_027209                                                    |
| 772 | Itpr1                       | inositol 1,4,5-triphosphate receptor 1                                           | 9.19E-05 | NM_010585                                                    |
| 773 | Agfg2                       | ArfGAP with FG repeats 2                                                         | 9.21E-05 | NM_145566 /// NM_178162                                      |
| 774 | Timp2                       | tissue inhibitor of metalloproteinase 2                                          | 9.23E-05 | NM_011594                                                    |
| 775 | Pla2g15                     | phospholipase A2, group XV                                                       | 9.23E-05 | NM_133792                                                    |
| 776 | Rhou                        | ras homolog gene family, member U                                                | 9.27E-05 | NM_133955                                                    |
| 777 | 1700017B05Rik               | RIKEN cDNA 1700017B05 gene                                                       | 9.27E-05 | NM_028820                                                    |
| 778 | Nagk                        | N-acetylglucosamine kinase                                                       | 9.27E-05 | NM_001164187 /// NM_019542                                   |
| 779 | Ndufa5                      | NADH dehydrogenase (ubiquinone) 1 alpha subcomplex, 5                            | 9.32E-05 | NM_026614                                                    |

|     |                                 |                                                                                  |          |                                                                     |
|-----|---------------------------------|----------------------------------------------------------------------------------|----------|---------------------------------------------------------------------|
| 780 | Rhoc                            | ras homolog gene family, member C                                                | 9.51E-05 | NM_007484                                                           |
| 781 | Tgm2                            | transglutaminase 2, C polypeptide                                                | 9.59E-05 | NM_009373                                                           |
| 782 | 1700102P08Rik                   | RIKEN cDNA 1700102P08 gene                                                       | 9.60E-05 | NM_053216                                                           |
| 783 | 4931440B09Rik                   | RIKEN cDNA 4931440B09 gene                                                       | 9.64E-05 | NM_027644                                                           |
| 784 | Slc1a4                          | solute carrier family 1 (glutamate/neutral amino acid transporter), member 4     | 9.64E-05 | NM_018861                                                           |
| 785 | Tbc1d14                         | TBC1 domain family, member 14                                                    | 9.66E-05 | NM_001113362 /// NM_001113364 /// NM_133910 /// XM_001475805        |
| 786 | Klf6                            | Kruppel-like factor 6                                                            | 9.80E-05 | NM_011803                                                           |
| 787 | Hsbp1                           | heat shock factor binding protein 1                                              | 9.83E-05 | NM_024219                                                           |
| 788 | Mpdz                            | multiple PDZ domain protein                                                      | 9.83E-05 | NM_010820                                                           |
| 789 | Fdft1                           | farnesyl diphosphate farnesyl transferase 1                                      | 9.84E-05 | NM_010191                                                           |
| 790 | Efcab2                          | EF-hand calcium binding domain 2                                                 | 9.87E-05 | NM_026626                                                           |
| 791 | Tpm2                            | tropomyosin 2, beta                                                              | 9.88E-05 | NM_009416                                                           |
| 792 | Cfh /// LOC100048018            | complement component factor h /// similar to complement component factor H       | 9.89E-05 | NM_009888 /// XM_001479650                                          |
| 793 | Serf2                           | small EDRK-rich factor 2                                                         | 9.90E-05 | NM_011354                                                           |
| 794 | Fiz1                            | Flt3 interacting zinc finger protein 1                                           | 9.91E-05 | NM_001110328 /// NM_001110329 /// NM_001110330 /// NM_011813        |
| 795 | Atf7ip                          | activating transcription factor 7 interacting protein                            | 9.93E-05 | NM_019426                                                           |
| 796 | Rpn1                            | ribophorin I                                                                     | 9.94E-05 | NM_133933                                                           |
| 797 | LOC100045833 /// Ly6c1 /// Ly   | similar to Lymphocyte antigen 6C precursor (Ly-6C) /// lymphocyte antigen 6 comp | 9.95E-05 | NM_001099217 /// NM_010741 /// XM_001475001 /// XM_001477071 /// XM |
| 798 | Zfp361l                         | zinc finger protein 36, C3H type-like 1                                          | 9.98E-05 | NM_007564                                                           |
| 799 | Naaa                            | N-acyl ethanolamine acid amidase                                                 | 9.99E-05 | NM_001163687 /// NM_025972                                          |
| 800 | Reln                            | reelin                                                                           | 1.00E-04 | NM_011261                                                           |
| 801 | Ctla2b                          | cytotoxic T lymphocyte-associated protein 2 beta                                 | 1.01E-04 | NM_001145801 /// NM_007797 /// XM_001477566                         |
| 802 | D0H4S114                        | DNA segment, human D4S114                                                        | 1.02E-04 | NM_001109988 /// NM_001109989 /// NM_001109990 /// NM_053078        |
| 803 | Litaf                           | LPS-induced TN factor                                                            | 1.02E-04 | NM_019980                                                           |
| 804 | Tgm2                            | transglutaminase 2, C polypeptide                                                | 1.02E-04 | NM_009373                                                           |
| 805 | Rnf114                          | ring finger protein 114                                                          | 1.02E-04 | NM_030743                                                           |
| 806 | Cttna1                          | catenin (cadherin associated protein), alpha 1                                   | 1.04E-04 | NM_009818                                                           |
| 807 | Fmn2 /// LOC100044570           | formin 2 /// similar to formin-2                                                 | 1.04E-04 | NM_019445 /// XR_030793                                             |
| 808 | Cd14                            | CD14 antigen                                                                     | 1.05E-04 | NM_009841                                                           |
| 809 | D16Ert472e                      | DNA segment, Chr 16, ERATO Doi 472, expressed                                    | 1.05E-04 | NM_025967 /// XM_001473183                                          |
| 810 | Ncor2                           | nuclear receptor co-repressor 2                                                  | 1.05E-04 | NM_011424                                                           |
| 811 | Igh /// Igh-2 /// Igh-VJ558 /// | immunoglobulin heavy chain complex /// immunoglobulin heavy chain 2 (serum IgA   | 1.06E-04 | ---                                                                 |
| 812 | Nid1                            | nidogen 1                                                                        | 1.07E-04 | NM_010917                                                           |
| 813 | Grb10                           | growth factor receptor bound protein 10                                          | 1.07E-04 | NM_010345                                                           |
| 814 | Them4                           | thioesterase superfamily member 4                                                | 1.08E-04 | NM_029431                                                           |
| 815 | Pdha1                           | pyruvate dehydrogenase E1 alpha 1                                                | 1.08E-04 | NM_008810                                                           |
| 816 | Fscn1                           | fascin homolog 1, actin bundling protein (Strongylocentrotus purpuratus)         | 1.08E-04 | NM_007984                                                           |
| 817 | Smpdl3a                         | sphingomyelin phosphodiesterase, acid-like 3A                                    | 1.08E-04 | NM_020561                                                           |
| 818 | Dap                             | death-associated protein                                                         | 1.09E-04 | NM_146057                                                           |
| 819 | Nov                             | nephroblastoma overexpressed gene                                                | 1.10E-04 | NM_010930                                                           |
| 820 | Myb                             | myeloblastosis oncogene                                                          | 1.10E-04 | NM_010848                                                           |
| 821 | Dnpep                           | aspartyl aminopeptidase                                                          | 1.11E-04 | NM_001110831 /// NM_016878                                          |
| 822 | Col15a1                         | collagen, type XV, alpha 1                                                       | 1.11E-04 | NM_009928                                                           |
| 823 | 1810044D09Rik                   | RIKEN cDNA 1810044D09 gene                                                       | 1.12E-04 | ---                                                                 |
| 824 | Tmem186                         | transmembrane protein 186                                                        | 1.13E-04 | NM_025708                                                           |
| 825 | BC046331                        | cDNA sequence BC046331                                                           | 1.13E-04 | NM_177673                                                           |

|     |                                       |                                                                                  |          |                                                                                 |
|-----|---------------------------------------|----------------------------------------------------------------------------------|----------|---------------------------------------------------------------------------------|
| 826 | Arpp21                                | cyclic AMP-regulated phosphoprotein, 21                                          | 1.13E-04 | NM_028755 /// NM_033264                                                         |
| 827 | Syp1                                  | synaptophysin-like protein                                                       | 1.14E-04 | NM_013635 /// NM_198710                                                         |
| 828 | Usp7                                  | ubiquitin specific peptidase 7                                                   | 1.16E-04 | NM_001003918                                                                    |
| 829 | Pfkfb3                                | phosphofructokinase, muscle                                                      | 1.17E-04 | NM_001163487 /// NM_001163488 /// NM_021514                                     |
| 830 | Rhoj                                  | ras homolog gene family, member J                                                | 1.18E-04 | NM_023275                                                                       |
| 831 | Elf4e                                 | eukaryotic translation initiation factor 4E                                      | 1.18E-04 | NM_007917 /// XM_001004193                                                      |
| 832 | Plek                                  | pleckstrin                                                                       | 1.19E-04 | NM_019549                                                                       |
| 833 | Hexa                                  | hexosaminidase A                                                                 | 1.19E-04 | NM_010421                                                                       |
| 834 | Hnrnp2                                | heterogeneous nuclear ribonucleoprotein H2                                       | 1.19E-04 | NM_019868                                                                       |
| 835 | ---                                   | ---                                                                              | 1.19E-04 | ---                                                                             |
| 836 | Acbd6                                 | acyl-Coenzyme A binding domain containing 6                                      | 1.19E-04 | NM_001145781 /// NM_026683 /// NM_028250                                        |
| 837 | 1190002H23Rik                         | RIKEN cDNA 1190002H23 gene                                                       | 1.19E-04 | NM_025427                                                                       |
| 838 | Pon3                                  | paraoxonase 3                                                                    | 1.19E-04 | NM_173006                                                                       |
| 839 | Hist1h2ad /// Hist1h2an /// Hist1h2af | histone cluster 1, H2ad /// histone cluster 1, H2an /// histone cluster 2, H2aa1 | 1.20E-04 | NM_013549 /// NM_019469 /// NM_175662 /// NM_178184 /// NM_178188 /// NM_178189 |
| 840 | Runx2                                 | runt related transcription factor 2                                              | 1.20E-04 | NM_001145920 /// NM_001146038 /// NM_009820                                     |
| 841 | Fbln1                                 | fibulin 1                                                                        | 1.20E-04 | NM_010180                                                                       |
| 842 | Wwc2                                  | WW, C2 and coiled-coil domain containing 2                                       | 1.20E-04 | NM_133791                                                                       |
| 843 | Dgcr14                                | DiGeorge syndrome critical region gene 14                                        | 1.21E-04 | NM_001081633 /// NM_022408                                                      |
| 844 | Rtn3                                  | reticulon 3                                                                      | 1.22E-04 | NM_001003930 /// NM_001003933 /// NM_001003934 /// NM_053076                    |
| 845 | Dolk                                  | dolichol kinase                                                                  | 1.22E-04 | NM_177648                                                                       |
| 846 | Mmp23                                 | matrix metalloproteinase 23                                                      | 1.22E-04 | NM_011985                                                                       |
| 847 | Agbl3                                 | ATP/GTP binding protein-like 3                                                   | 1.23E-04 | NM_178630                                                                       |
| 848 | Cox5b                                 | cytochrome c oxidase, subunit Vb                                                 | 1.23E-04 | NM_009942                                                                       |
| 849 | Klra3 /// Klra9                       | killer cell lectin-like receptor, subfamily A, member 3 /// killer cell lectin-I | 1.23E-04 | NM_010648 /// NM_010651                                                         |
| 850 | Gm11793 /// Hnrnpf                    | predicted gene 11793 /// heterogeneous nuclear ribonucleoprotein F               | 1.23E-04 | NM_133834 /// XR_002079 /// XR_034451                                           |
| 851 | Tom7                                  | translocase of outer mitochondrial membrane 7 homolog (yeast)                    | 1.24E-04 | NM_025394                                                                       |
| 852 | Pgam1                                 | phosphoglycerate mutase 1                                                        | 1.24E-04 | NM_023418                                                                       |
| 853 | Nhp211                                | NHP2 non-histone chromosome protein 2-like 1 (S. cerevisiae)                     | 1.25E-04 | NM_011482                                                                       |
| 854 | H1f0                                  | H1 histone family, member 0                                                      | 1.25E-04 | NM_008197                                                                       |
| 855 | Dhx57                                 | DEAH (Asp-Glu-Ala-Asp/His) box polypeptide 57                                    | 1.28E-04 | NM_001163759 /// NM_198942                                                      |
| 856 | Sp110                                 | Sp110 nuclear body protein                                                       | 1.28E-04 | NM_175397                                                                       |
| 857 | Gbf1                                  | golgi-specific brefeldin A-resistance factor 1                                   | 1.28E-04 | NM_178930                                                                       |
| 858 | Fgf1                                  | fibroblast growth factor 1                                                       | 1.29E-04 | NM_010197                                                                       |
| 859 | Tmem39a                               | transmembrane protein 39a                                                        | 1.30E-04 | NM_026407                                                                       |
| 860 | Sys1                                  | SYS1 Golgi-localized integral membrane protein homolog (S. cerevisiae)           | 1.30E-04 | NM_025575                                                                       |
| 861 | E330009J07Rik                         | RIKEN cDNA E330009J07 gene                                                       | 1.30E-04 | NM_175528                                                                       |
| 862 | Cdc42ep3                              | CDC42 effector protein (Rho GTPase binding) 3                                    | 1.30E-04 | NM_026514                                                                       |
| 863 | Nfix                                  | nuclear factor I/X                                                               | 1.31E-04 | NM_001081981 /// NM_001081982 /// NM_010906                                     |
| 864 | Zfp503                                | zinc finger protein 503                                                          | 1.31E-04 | NM_145459                                                                       |
| 865 | Als2                                  | amyotrophic lateral sclerosis 2 (juvenile) homolog (human)                       | 1.31E-04 | NM_001159948 /// NM_028717 /// NM_146109                                        |
| 866 | Trim31                                | tripartite motif-containing 31                                                   | 1.31E-04 | NM_146077                                                                       |
| 867 | Rpl14                                 | ribosomal protein L14                                                            | 1.32E-04 | NM_025974                                                                       |
| 868 | ---                                   | ---                                                                              | 1.32E-04 | ---                                                                             |
| 869 | Rag1ap1                               | recombination activating gene 1 activating protein 1                             | 1.32E-04 | NM_009057                                                                       |
| 870 | LOC100045163 /// Plbd1                | similar to RIKEN cDNA 1100001H23 gene /// phospholipase B domain containing 1    | 1.34E-04 | NM_025806 /// XM_001473518                                                      |
| 871 | P2ry14                                | purinergic receptor P2Y, G-protein coupled, 14                                   | 1.34E-04 | NM_001008497 /// NM_133200                                                      |

|     |                             |                                                                                  |          |                                                                     |
|-----|-----------------------------|----------------------------------------------------------------------------------|----------|---------------------------------------------------------------------|
| 872 | Smpd1                       | sphingomyelin phosphodiesterase 1, acid lysosomal                                | 1.34E-04 | NM_011421                                                           |
| 873 | Kik1 /// Kik1b5             | kallikrein 1 /// kallikrein 1-related peptidase b5                               | 1.34E-04 | NM_008456 /// NM_010639                                             |
| 874 | Arsg                        | arylsulfatase G                                                                  | 1.34E-04 | NM_028710                                                           |
| 875 | OTTMUSG00000010657          | predicted gene, OTTMUSG00000010657                                               | 1.34E-04 | NM_001083918                                                        |
| 876 | Yipf3                       | Yip1 domain family, member 3                                                     | 1.35E-04 | NM_145353                                                           |
| 877 | Apbb2                       | amyloid beta (A4) precursor protein-binding, family B, member 2                  | 1.35E-04 | NM_009686                                                           |
| 878 | Prkcb                       | protein kinase C, beta                                                           | 1.35E-04 | NM_008855                                                           |
| 879 | Hbp1                        | high mobility group box transcription factor 1                                   | 1.35E-04 | NM_153198 /// NM_177993                                             |
| 880 | Nucb1                       | nucleobindin 1                                                                   | 1.35E-04 | NM_001163662 /// NM_008749                                          |
| 881 | Cd276                       | CD276 antigen                                                                    | 1.36E-04 | NM_133983                                                           |
| 882 | Tmem106a                    | transmembrane protein 106A                                                       | 1.36E-04 | NM_144830                                                           |
| 883 | Mbp                         | myelin basic protein                                                             | 1.36E-04 | NM_001025245 /// NM_001025251 /// NM_001025254 /// NM_001025255 /// |
| 884 | Ssbp1                       | single-stranded DNA binding protein 1                                            | 1.36E-04 | NM_028358 /// NM_212468                                             |
| 885 | Shfm1                       | split hand/foot malformation (ectrodactyly) type 1                               | 1.37E-04 | NM_009169                                                           |
| 886 | Snhg6                       | small nucleolar RNA host gene (non-protein coding) 6                             | 1.37E-04 | NR_024067                                                           |
| 887 | Igfbp4                      | insulin-like growth factor binding protein 4                                     | 1.37E-04 | NM_010517                                                           |
| 888 | Prr15                       | proline rich 15                                                                  | 1.37E-04 | NM_030024                                                           |
| 889 | Vit                         | vitrin                                                                           | 1.37E-04 | NM_028813                                                           |
| 890 | Acot1 /// LOC100044830      | acyl-CoA thioesterase 1 /// similar to acyl-CoA thioesterase                     | 1.38E-04 | NM_012006 /// XR_031056                                             |
| 891 | Mtmr6                       | myotubularin related protein 6                                                   | 1.38E-04 | NM_144843                                                           |
| 892 | Gpm6b                       | glycoprotein m6b                                                                 | 1.38E-04 | NM_023122                                                           |
| 893 | C1r /// C1rb                | complement component 1, r subcomponent /// complement component 1, r subcom      | 1.38E-04 | NM_001113356 /// NM_023143 /// XM_001002804 /// XM_001480171        |
| 894 | Tm7sf3                      | transmembrane 7 superfamily member 3                                             | 1.40E-04 | NM_026281 /// XM_001475674                                          |
| 895 | Ctsl                        | cathepsin L                                                                      | 1.40E-04 | NM_009984                                                           |
| 896 | Cyp7b1                      | cytochrome P450, family 7, subfamily b, polypeptide 1                            | 1.40E-04 | NM_007825                                                           |
| 897 | Metrnl                      | meteorin, glial cell differentiation regulator-like                              | 1.40E-04 | NM_144797                                                           |
| 898 | Wsb2                        | WD repeat and SOCS box-containing 2                                              | 1.40E-04 | NM_021539                                                           |
| 899 | Ptfr                        | polymerase I and transcript release factor                                       | 1.40E-04 | NM_008986                                                           |
| 900 | RabggtA                     | Rab geranylgeranyl transferase, a subunit                                        | 1.41E-04 | NM_019519                                                           |
| 901 | ---                         | ---                                                                              | 1.42E-04 | ---                                                                 |
| 902 | Igh /// Ighg                | immunoglobulin heavy chain complex /// Immunoglobulin heavy chain (gamma poly    | 1.43E-04 | XM_001472541                                                        |
| 903 | Crygs                       | crystallin, gamma S                                                              | 1.45E-04 | NM_009967                                                           |
| 904 | Ndufa5                      | NADH dehydrogenase (ubiquinone) 1 alpha subcomplex, 5                            | 1.46E-04 | NM_026614                                                           |
| 905 | Gng12                       | guanine nucleotide binding protein (G protein), gamma 12                         | 1.46E-04 | NM_025278                                                           |
| 906 | LOC100047839 /// Tomm6      | hypothetical protein LOC100047839 /// translocase of outer mitochondrial membran | 1.46E-04 | NM_025365 /// XM_001479252                                          |
| 907 | Gm9844 /// LOC100048142 /// | predicted gene 9844 /// similar to thymosin, beta 10 /// thymosin, beta 10       | 1.46E-04 | NM_001039392 /// NM_025284 /// XM_001478515 /// XM_001479830 /// XM |
| 908 | Cd151                       | CD151 antigen                                                                    | 1.47E-04 | NM_001111049 /// NM_001111050 /// NM_009842                         |
| 909 | Itgax                       | integrin alpha X                                                                 | 1.48E-04 | NM_021334                                                           |
| 910 | Rpl13 /// Tax1bp3           | ribosomal protein L13 /// Tax1 (human T-cell leukemia virus type I) binding prot | 1.49E-04 | NM_016738 /// NM_029564                                             |
| 911 | Dapk1                       | death associated protein kinase 1                                                | 1.49E-04 | NM_029653 /// NM_134062                                             |
| 912 | Tcf12                       | transcription factor 12                                                          | 1.49E-04 | NM_011544                                                           |
| 913 | Ermap                       | erythroblast membrane-associated protein                                         | 1.49E-04 | NM_013848                                                           |
| 914 | Chst12                      | carbohydrate sulfotransferase 12                                                 | 1.49E-04 | NM_021528                                                           |
| 915 | Cd36                        | CD36 antigen                                                                     | 1.50E-04 | NM_001159555 /// NM_001159556 /// NM_001159557 /// NM_001159558 /// |
| 916 | Clec4n                      | C-type lectin domain family 4, member n                                          | 1.50E-04 | NM_020001                                                           |
| 917 | Flt1                        | FMS-like tyrosine kinase 1                                                       | 1.51E-04 | NM_010228                                                           |

|     |                              |                                                                                 |          |                                                                            |
|-----|------------------------------|---------------------------------------------------------------------------------|----------|----------------------------------------------------------------------------|
| 918 | Angptl4                      | angiopoietin-like 4                                                             | 1.51E-04 | NM_020581                                                                  |
| 919 | Elf2ak3                      | eukaryotic translation initiation factor 2 alpha kinase 3                       | 1.51E-04 | NM_010121                                                                  |
| 920 | Emp2                         | epithelial membrane protein 2                                                   | 1.52E-04 | NM_007929                                                                  |
| 921 | Slc2a9                       | solute carrier family 2 (facilitated glucose transporter), member 9             | 1.52E-04 | NM_001012363 /// NM_001102414 /// NM_001102415 /// NM_145559               |
| 922 | Enoph1                       | enolase-phosphatase 1                                                           | 1.53E-04 | NM_001163035 /// NM_026421 /// NR_027990                                   |
| 923 | Gstm5                        | glutathione S-transferase, mu 5                                                 | 1.53E-04 | NM_010360                                                                  |
| 924 | Selp                         | selectin, platelet                                                              | 1.53E-04 | NM_011347                                                                  |
| 925 | Rnf7                         | ring finger protein 7                                                           | 1.53E-04 | NM_011279                                                                  |
| 926 | Lasp1                        | LIM and SH3 protein 1                                                           | 1.54E-04 | NM_010688                                                                  |
| 927 | Fech                         | ferrochelatase                                                                  | 1.55E-04 | NM_007998                                                                  |
| 928 | Prpf3                        | PRP3 pre-mRNA processing factor 3 homolog (yeast)                               | 1.55E-04 | NM_027541                                                                  |
| 929 | Dcaf11                       | DDB1 and CUL4 associated factor 11                                              | 1.55E-04 | NM_133734                                                                  |
| 930 | Far1                         | fatty acyl CoA reductase 1                                                      | 1.57E-04 | NM_026143 /// NM_027379                                                    |
| 931 | Adcy9                        | adenylate cyclase 9                                                             | 1.58E-04 | NM_009624                                                                  |
| 932 | E2f4                         | E2F transcription factor 4                                                      | 1.60E-04 | NM_148952                                                                  |
| 933 | Hes1                         | hairy and enhancer of split 1 (Drosophila)                                      | 1.61E-04 | NM_008235                                                                  |
| 934 | Wnk1                         | WNK lysine deficient protein kinase 1                                           | 1.62E-04 | NM_198703                                                                  |
| 935 | Rusc1                        | RUN and SH3 domain containing 1                                                 | 1.62E-04 | NM_001083807 /// NM_001083808 /// NM_028188                                |
| 936 | H2-Ea                        | histocompatibility 2, class II antigen E alpha                                  | 1.63E-04 | NM_010381                                                                  |
| 937 | Ndufa1                       | NADH dehydrogenase (ubiquinone) 1 alpha subcomplex, 1                           | 1.63E-04 | NM_019443                                                                  |
| 938 | Tnfsf10                      | tumor necrosis factor (ligand) superfamily, member 10                           | 1.64E-04 | NM_009425                                                                  |
| 939 | 8-Sep                        | septin 8                                                                        | 1.64E-04 | NM_033144                                                                  |
| 940 | Pex16                        | peroxisomal biogenesis factor 16                                                | 1.64E-04 | NM_145122 /// NR_028114                                                    |
| 941 | Smad1                        | MAD homolog 1 (Drosophila)                                                      | 1.64E-04 | NM_008539                                                                  |
| 942 | Mami1                        | mastermind like 1 (Drosophila)                                                  | 1.65E-04 | NM_175334                                                                  |
| 943 | Pea15a                       | phosphoprotein enriched in astrocytes 15A                                       | 1.66E-04 | NM_011063                                                                  |
| 944 | Tshz1                        | teashirt zinc finger family member 1                                            | 1.66E-04 | NM_001081300                                                               |
| 945 | Elf2ak1                      | eukaryotic translation initiation factor 2 alpha kinase 1                       | 1.67E-04 | NM_013557                                                                  |
| 946 | Myadm                        | myeloid-associated differentiation marker                                       | 1.68E-04 | NM_001093764 /// NM_001093765 /// NM_001093766 /// NM_016969               |
| 947 | Cyhr1                        | cysteine and histidine rich 1                                                   | 1.69E-04 | NM_019396 /// NM_180962                                                    |
| 948 | Tmem9b                       | TMEM9 domain family, member B                                                   | 1.69E-04 | NM_020050                                                                  |
| 949 | Zfr                          | zinc finger RNA binding protein                                                 | 1.72E-04 | NM_011767                                                                  |
| 950 | Plce1                        | phospholipase C, epsilon 1                                                      | 1.72E-04 | NM_019588                                                                  |
| 951 | Ablim1                       | actin-binding LIM protein 1                                                     | 1.73E-04 | NM_001103177 /// NM_001103178 /// NM_178688                                |
| 952 | Gm11793 /// Hnrnpf           | predicted gene 11793 /// heterogeneous nuclear ribonucleoprotein F              | 1.74E-04 | NM_133834 /// XR_002079 /// XR_034451                                      |
| 953 | ---                          | ---                                                                             | 1.77E-04 | ---                                                                        |
| 954 | Fam13b                       | family with sequence similarity 13, member B                                    | 1.77E-04 | NM_146084                                                                  |
| 955 | Calcr1                       | calcitonin receptor-like                                                        | 1.77E-04 | NM_018782                                                                  |
| 956 | Rpl14                        | ribosomal protein L14                                                           | 1.78E-04 | NM_025974                                                                  |
| 957 | Ero1l /// Gm10191 /// Gm1300 | ERO1-like (S. cerevisiae) /// predicted gene 10191 /// predicted gene 13004 /// | 1.78E-04 | NM_015774 /// NM_053257 /// XM_001473217 /// XM_001478009 /// XM_001478010 |
| 958 | Nap11                        | nucleosome assembly protein 1-like 1                                            | 1.78E-04 | NM_001146707 /// NM_015781                                                 |
| 959 | Trim44                       | tripartite motif-containing 44                                                  | 1.79E-04 | NM_020267                                                                  |
| 960 | Hspa1b                       | heat shock protein 1B                                                           | 1.79E-04 | NM_010478                                                                  |
| 961 | Mttp                         | microsomal triglyceride transfer protein                                        | 1.80E-04 | NM_001163457 /// NM_008642                                                 |
| 962 | Zdhhc14                      | zinc finger, DHHC domain containing 14                                          | 1.80E-04 | NM_146073                                                                  |
| 963 | Fcgr2b                       | Fc receptor, IgG, low affinity IIb                                              | 1.81E-04 | NM_001077189 /// NM_010187                                                 |

|      |                                |                                                                                  |          |                                                                     |
|------|--------------------------------|----------------------------------------------------------------------------------|----------|---------------------------------------------------------------------|
| 964  | A2m /// LOC677369              | alpha-2-macroglobulin /// hypothetical protein LOC677369                         | 1.83E-04 | NM_175628 /// XR_005046                                             |
| 965  | Prss16                         | protease, serine, 16 (thymus)                                                    | 1.83E-04 | NM_019429                                                           |
| 966  | Cdc42se1                       | CDC42 small effector 1                                                           | 1.83E-04 | NM_001038708 /// NM_172395                                          |
| 967  | Itns1                          | intersectin 1 (SH3 domain protein 1A)                                            | 1.83E-04 | NM_001110275 /// NM_001110276 /// NM_010587                         |
| 968  | Spred1                         | sprouty protein with EVH-1 domain 1, related sequence                            | 1.83E-04 | NM_033524                                                           |
| 969  | Smo                            | smoothened homolog (Drosophila)                                                  | 1.85E-04 | NM_176996                                                           |
| 970  | Gpr137b /// Gpr137b-ps /// LOC | G protein-coupled receptor 137B /// G protein-coupled receptor 137B, pseudogene  | 1.86E-04 | NM_031999 /// NR_003568 /// XM_001473441 /// XR_001658              |
| 971  | Sharpin                        | SHANK-associated RH domain interacting protein                                   | 1.87E-04 | NM_025340                                                           |
| 972  | Fads1                          | fatty acid desaturase 1                                                          | 1.87E-04 | NM_146094                                                           |
| 973  | 1810026J23RIK                  | RIKEN cDNA 1810026J23 gene                                                       | 1.88E-04 | NM_178619                                                           |
| 974  | BC056474                       | cDNA sequence BC056474                                                           | 1.88E-04 | NM_001001493                                                        |
| 975  | O610007P08RIK                  | RIKEN cDNA O610007P08 gene                                                       | 1.89E-04 | NM_001013608 /// NM_023507                                          |
| 976  | Ube2d2                         | ubiquitin-conjugating enzyme E2D 2                                               | 1.89E-04 | NM_019912                                                           |
| 977  | Mat2a                          | methionine adenosyltransferase II, alpha                                         | 1.90E-04 | NM_145569                                                           |
| 978  | LOC100044953 /// Ppp1cb        | similar to protein phosphatase 1 /// protein phosphatase 1, catalytic subunit, b | 1.91E-04 | NM_172707 /// XR_031192                                             |
| 979  | Rexo2                          | REX2, RNA exonuclease 2 homolog (S. cerevisiae)                                  | 1.91E-04 | NM_024233                                                           |
| 980  | Tmem50b                        | transmembrane protein 50B                                                        | 1.92E-04 | NM_030018                                                           |
| 981  | Dst                            | dystonin                                                                         | 1.93E-04 | NM_133833 /// NM_134448                                             |
| 982  | Ptprf                          | protein tyrosine phosphatase, receptor type, F                                   | 1.94E-04 | NM_011213                                                           |
| 983  | Mfhas1                         | malignant fibrous histiocytoma amplified sequence 1                              | 1.94E-04 | NM_001081279                                                        |
| 984  | Tulp3                          | tubby-like protein 3                                                             | 1.95E-04 | NM_011657                                                           |
| 985  | Farp2                          | FERM, RhoGEF and pleckstrin domain protein 2                                     | 1.96E-04 | NM_145519                                                           |
| 986  | Pvrl4                          | poliovirus receptor-related 4                                                    | 1.96E-04 | NM_001122680 /// NM_027893                                          |
| 987  | Ilgp1                          | interferon inducible GTPase 1                                                    | 1.97E-04 | NM_001146275 /// NM_021792                                          |
| 988  | Scara3                         | scavenger receptor class A, member 3                                             | 1.97E-04 | NM_172604                                                           |
| 989  | Dgcr2                          | DiGeorge syndrome critical region gene 2                                         | 1.97E-04 | NM_001109750 /// NM_010048                                          |
| 990  | Baz2a                          | bromodomain adjacent to zinc finger domain, 2A                                   | 1.97E-04 | NM_054078                                                           |
| 991  | Serbp1                         | serpine1 mRNA binding protein 1                                                  | 1.97E-04 | NM_001113564 /// NM_001113565 /// NM_001113566 /// NM_025814        |
| 992  | Wwtr1                          | WW domain containing transcription regulator 1                                   | 1.98E-04 | NM_133784                                                           |
| 993  | Aspm                           | asp (abnormal spindle)-like, microcephaly associated (Drosophila)                | 1.99E-04 | NM_009791                                                           |
| 994  | Cd83                           | CD83 antigen                                                                     | 1.99E-04 | NM_009856                                                           |
| 995  | Cyb5r3                         | cytochrome b5 reductase 3                                                        | 2.00E-04 | NM_029787                                                           |
| 996  | Hvcn1                          | hydrogen voltage-gated channel 1                                                 | 2.01E-04 | NM_001042489 /// NM_028752                                          |
| 997  | Atp6v1b2                       | ATPase, H+ transporting, lysosomal V1 subunit B2                                 | 2.02E-04 | NM_007509                                                           |
| 998  | Atp6v0c                        | ATPase, H+ transporting, lysosomal V0 subunit C                                  | 2.03E-04 | NM_009729                                                           |
| 999  | Map4k4                         | mitogen-activated protein kinase kinase kinase kinase 4                          | 2.04E-04 | NM_008696                                                           |
| 1000 | S100a8                         | S100 calcium binding protein A8 (calgranulin A)                                  | 2.06E-04 | NM_013650                                                           |
| 1001 | Abcb1a                         | ATP-binding cassette, sub-family B (MDR/TAP), member 1A                          | 2.07E-04 | NM_011076                                                           |
| 1002 | Tom7                           | translocase of outer mitochondrial membrane 7 homolog (yeast)                    | 2.08E-04 | NM_025394                                                           |
| 1003 | Ralgs2                         | Ral GEF with PH domain and SH3 binding motif 2                                   | 2.08E-04 | NM_001159965 /// NM_001159966 /// NM_001159967 /// NM_001159968 /// |
| 1004 | Slc25a36                       | solute carrier family 25, member 36                                              | 2.08E-04 | NM_138756                                                           |
| 1005 | Rgs2                           | regulator of G-protein signaling 2                                               | 2.09E-04 | NM_009061                                                           |
| 1006 | Tnfrsf1a                       | tumor necrosis factor receptor superfamily, member 1a                            | 2.09E-04 | NM_011609                                                           |
| 1007 | Trib2                          | tribbles homolog 2 (Drosophila)                                                  | 2.10E-04 | NM_144551 /// XM_001474232 /// XM_001480364                         |
| 1008 | Esm1                           | endothelial cell-specific molecule 1                                             | 2.10E-04 | NM_023612 /// XM_906879                                             |
| 1009 | Lasp1                          | LIM and SH3 protein 1                                                            | 2.10E-04 | NM_010688                                                           |

|      |                                 |                                                                                 |          |                                                                     |
|------|---------------------------------|---------------------------------------------------------------------------------|----------|---------------------------------------------------------------------|
| 1010 | BC004004                        | cDNA sequence BC004004                                                          | 2.11E-04 | NM_030561                                                           |
| 1011 | Large                           | like-glycosyltransferase                                                        | 2.11E-04 | NM_010687                                                           |
| 1012 | LOC100048071 /// Tex21          | similar to tsec-2 /// testis expressed gene 21                                  | 2.12E-04 | NM_001159532 /// NM_019784 /// XR_034206                            |
| 1013 | Ldoc1l                          | leucine zipper, down-regulated in cancer 1-like                                 | 2.13E-04 | NM_177630                                                           |
| 1014 | Krt18                           | keratin 18                                                                      | 2.14E-04 | NM_010664                                                           |
| 1015 | Myo1g                           | myosin IG                                                                       | 2.14E-04 | NM_178440                                                           |
| 1016 | Srprb                           | signal recognition particle receptor, B subunit                                 | 2.15E-04 | NM_009275                                                           |
| 1017 | Atp2a3                          | ATPase, Ca++ transporting, ubiquitous                                           | 2.15E-04 | NM_001163336 /// NM_001163337 /// NM_016745                         |
| 1018 | ---                             | ---                                                                             | 2.19E-04 | ---                                                                 |
| 1019 | Msi2                            | Musashi homolog 2 (Drosophila)                                                  | 2.21E-04 | NM_054043 /// XM_001471946                                          |
| 1020 | Cox5b                           | cytochrome c oxidase, subunit Vb                                                | 2.21E-04 | NM_009942                                                           |
| 1021 | Evl /// LOC100047333            | Ena-vasodilator stimulated phosphoprotein /// similar to Ena-VASP-like          | 2.22E-04 | NM_001163394 /// NM_001163395 /// NM_001163396 /// NM_007965 /// XM |
| 1022 | Kcmf1                           | potassium channel modulatory factor 1                                           | 2.22E-04 | NM_019715 /// XM_001477544                                          |
| 1023 | Dleu2                           | deleted in lymphocytic leukemia, 2                                              | 2.23E-04 | NR_028264 /// XM_001000367 /// XM_981454                            |
| 1024 | Klf9                            | Kruppel-like factor 9                                                           | 2.24E-04 | NM_010638 /// XM_001479552                                          |
| 1025 | Slc39a8                         | solute carrier family 39 (metal ion transporter), member 8                      | 2.26E-04 | NM_001135149 /// NM_001135150 /// NM_026228                         |
| 1026 | Tex261                          | testis expressed gene 261                                                       | 2.27E-04 | NM_009357                                                           |
| 1027 | S100a1                          | S100 calcium binding protein A1                                                 | 2.27E-04 | NM_011309                                                           |
| 1028 | Ubp1                            | upstream binding protein 1                                                      | 2.29E-04 | NM_001083319 /// NM_013699                                          |
| 1029 | Cugbp1                          | CUG triplet repeat, RNA binding protein 1                                       | 2.29E-04 | NM_017368 /// NM_198683                                             |
| 1030 | A430107D22Rik                   | RIKEN cDNA A430107D22 gene                                                      | 2.30E-04 | NM_178785                                                           |
| 1031 | Robo1                           | roundabout homolog 1 (Drosophila)                                               | 2.30E-04 | NM_019413                                                           |
| 1032 | Tnfsf12 /// Tnfsf12-tnfsf13 /// | tumor necrosis factor (ligand) superfamily, member 12 /// tumor necrosis factor | 2.30E-04 | NM_001034097 /// NM_001034098 /// NM_001159503 /// NM_001159505 /// |
| 1033 | Glipr1                          | GLI pathogenesis-related 1 (glioma)                                             | 2.30E-04 | NM_028608                                                           |
| 1034 | Tgm2                            | transglutaminase 2, C polypeptide                                               | 2.30E-04 | NM_009373                                                           |
| 1035 | Plekha7                         | pleckstrin homology domain containing, family A member 7                        | 2.31E-04 | NM_172743                                                           |
| 1036 | Spic                            | Spi-C transcription factor (Spi-1/PU.1 related)                                 | 2.32E-04 | NM_011461                                                           |
| 1037 | Sico5a1                         | solute carrier organic anion transporter family, member 5A1                     | 2.32E-04 | NM_172841                                                           |
| 1038 | Gns                             | glucosamine (N-acetyl)-6-sulfatase                                              | 2.32E-04 | NM_029364                                                           |
| 1039 | Pcsk7                           | proprotein convertase subtilisin/kexin type 7                                   | 2.33E-04 | NM_008794                                                           |
| 1040 | Tram1                           | translocating chain-associating membrane protein 1                              | 2.33E-04 | NM_028173                                                           |
| 1041 | Tmem42                          | transmembrane protein 42                                                        | 2.34E-04 | NM_025339                                                           |
| 1042 | Adipoq                          | adiponectin, C1Q and collagen domain containing                                 | 2.35E-04 | NM_009605                                                           |
| 1043 | Map3k1                          | mitogen-activated protein kinase kinase kinase 1                                | 2.35E-04 | NM_011945                                                           |
| 1044 | Gcom1                           | GRINL1A complex locus                                                           | 2.35E-04 | NM_001033208                                                        |
| 1045 | Mttr6                           | myotubularin related protein 6                                                  | 2.37E-04 | NM_144843                                                           |
| 1046 | Impa2                           | inositol (myo)-1(or 4)-monophosphatase 2                                        | 2.38E-04 | NM_053261                                                           |
| 1047 | Reep6                           | receptor accessory protein 6                                                    | 2.39E-04 | NM_139292                                                           |
| 1048 | Chac2                           | ChaC, cation transport regulator homolog 2 (E. coli)                            | 2.40E-04 | NM_026527                                                           |
| 1049 | P2ry6                           | pyrimidinergic receptor P2Y, G-protein coupled, 6                               | 2.41E-04 | NM_183168                                                           |
| 1050 | Pik3cg                          | phosphoinositide-3-kinase, catalytic, gamma polypeptide                         | 2.41E-04 | NM_001146200 /// NM_001146201 /// NM_020272                         |
| 1051 | Sparc                           | secreted acidic cysteine rich glycoprotein                                      | 2.43E-04 | NM_009242                                                           |
| 1052 | Elf4e3                          | eukaryotic translation initiation factor 4E member 3                            | 2.43E-04 | NM_025829                                                           |
| 1053 | 1810031K17Rik                   | RIKEN cDNA 1810031K17 gene                                                      | 2.43E-04 | NM_026977                                                           |
| 1054 | Aco1                            | aconitase 1                                                                     | 2.43E-04 | NM_007386                                                           |
| 1055 | H3f3b                           | H3 histone, family 3B                                                           | 2.44E-04 | NM_008211                                                           |

|      |                                 |                                                                                     |          |                                                                     |
|------|---------------------------------|-------------------------------------------------------------------------------------|----------|---------------------------------------------------------------------|
| 1056 | Pim2                            | :proviral integration site 2                                                        | 2.44E-04 | NM_138606                                                           |
| 1057 | Higd1c /// Mettl7a1 /// Mettl7a | :HIG1 domain family, member 1C /// methyltransferase like 7A1 /// methyltransferase | 2.45E-04 | NM_001002900 /// NM_027334 /// NM_199477                            |
| 1058 | Sri                             | :sorcin                                                                             | 2.45E-04 | NM_001080974 /// NM_025618                                          |
| 1059 | Ctsb                            | :cathepsin B                                                                        | 2.46E-04 | NM_007798                                                           |
| 1060 | Tmsb4x                          | :thymosin, beta 4, X chromosome                                                     | 2.48E-04 | NM_021278                                                           |
| 1061 | A030009H04Rik                   | :RIKEN cDNA A030009H04 gene                                                         | 2.48E-04 | NM_020591 /// NR_027827                                             |
| 1062 | Hnrnp1                          | :Heterogeneous nuclear ribonucleoprotein H1                                         | 2.48E-04 | NM_021510                                                           |
| 1063 | Pitpnm2                         | :phosphatidylinositol transfer protein, membrane-associated 2                       | 2.49E-04 | NM_011256                                                           |
| 1064 | Myst2                           | :MYST histone acetyltransferase 2                                                   | 2.50E-04 | NM_177619                                                           |
| 1065 | Cln6                            | :ceroid-lipofuscinosis, neuronal 6                                                  | 2.50E-04 | NM_001033175                                                        |
| 1066 | Fcgr2b                          | :Fc receptor, IgG, low affinity IIb                                                 | 2.50E-04 | NM_001077189 /// NM_010187                                          |
| 1067 | Opctl                           | :glutaminyI-peptide cyclotransferase-like                                           | 2.52E-04 | NM_026111                                                           |
| 1068 | Rqcd1                           | :rcd1 (required for cell differentiation) homolog 1 (S. pombe)                      | 2.53E-04 | NM_021383                                                           |
| 1069 | Gnpda1                          | :glucosamine-6-phosphate deaminase 1                                                | 2.55E-04 | NM_011937                                                           |
| 1070 | Pip5k1b                         | :phosphatidylinositol-4-phosphate 5-kinase, type 1 beta                             | 2.55E-04 | NM_008846                                                           |
| 1071 | LOC100046080 /// Spin1          | :similar to Spindlin 1 /// spindlin 1                                               | 2.56E-04 | NM_011462 /// NM_146043 /// XM_001475418 /// XM_001475434           |
| 1072 | Darc                            | :Duffy blood group, chemokine receptor                                              | 2.57E-04 | NM_010045                                                           |
| 1073 | Rap2a                           | :RAS related protein 2a                                                             | 2.57E-04 | NM_029519                                                           |
| 1074 | 1810063B05Rik                   | :RIKEN cDNA 1810063B05 gene                                                         | 2.58E-04 | NM_174987                                                           |
| 1075 | Psap                            | :prosaposin                                                                         | 2.60E-04 | NM_001146120 /// NM_001146121 /// NM_001146122 /// NM_001146123 /// |
| 1076 | Anxa9                           | :annexin A9                                                                         | 2.61E-04 | NM_001085383 /// NM_023628                                          |
| 1077 | Rcan2                           | :regulator of calcineurin 2                                                         | 2.63E-04 | NM_030598 /// NM_207649                                             |
| 1078 | Sh3bp5                          | :SH3-domain binding protein 5 (BTK-associated)                                      | 2.63E-04 | NM_011894                                                           |
| 1079 | Timp3                           | :tissue inhibitor of metalloproteinase 3                                            | 2.65E-04 | NM_011595                                                           |
| 1080 | Med26                           | :mediator complex subunit 26                                                        | 2.66E-04 | NM_027485                                                           |
| 1081 | Dnajb1                          | :DnaJ (Hsp40) homolog, subfamily B, member 1                                        | 2.67E-04 | NM_018808                                                           |
| 1082 | Ptges3                          | :prostaglandin E synthase 3 (cytosolic)                                             | 2.67E-04 | NM_019766                                                           |
| 1083 | Ercc4                           | :excision repair cross-complementing rodent repair deficiency, complementation gr   | 2.68E-04 | NM_015769                                                           |
| 1084 | D2Erdt391e                      | :DNA segment, Chr 2, ERATO Doi 391, expressed                                       | 2.69E-04 | NM_145528                                                           |
| 1085 | AI462493                        | :expressed sequence AI462493                                                        | 2.69E-04 | NM_001160356 /// XM_887080 /// XM_907845                            |
| 1086 | Cbx1                            | :chromobox homolog 1 (Drosophila HP1 beta)                                          | 2.70E-04 | NM_007622                                                           |
| 1087 | Bambi                           | :BMP and activin membrane-bound inhibitor, homolog (Xenopus laevis)                 | 2.73E-04 | NM_026505                                                           |
| 1088 | Entpd1                          | :ectonucleoside triphosphate diphosphohydrolase 1                                   | 2.74E-04 | NM_009848                                                           |
| 1089 | Hnrnpa1                         | :heterogeneous nuclear ribonucleoprotein A1                                         | 2.74E-04 | NM_001039129 /// NM_010447                                          |
| 1090 | Tipr1                           | :TIP41, TOR signalling pathway regulator-like (S. cerevisiae)                       | 2.76E-04 | NM_145513                                                           |
| 1091 | Snap23                          | :synaptosomal-associated protein 23                                                 | 2.76E-04 | NM_009222                                                           |
| 1092 | Paxip1                          | :PAX interacting (with transcription-activation domain) protein 1                   | 2.78E-04 | NM_018878                                                           |
| 1093 | Cdh11                           | :cadherin 11                                                                        | 2.78E-04 | NM_009866                                                           |
| 1094 | ---                             | ---                                                                                 | 2.78E-04 | ---                                                                 |
| 1095 | Heph                            | :hephaestin                                                                         | 2.81E-04 | NM_001159627 /// NM_001159628 /// NM_010417 /// NM_181273           |
| 1096 | Rbm7                            | :RNA binding motif protein 7                                                        | 2.81E-04 | NM_144948                                                           |
| 1097 | Dgcr6                           | :DiGeorge syndrome critical region gene 6                                           | 2.82E-04 | NM_010047                                                           |
| 1098 | Hsd17b4                         | :hydroxysteroid (17-beta) dehydrogenase 4                                           | 2.83E-04 | NM_008292                                                           |
| 1099 | Wnt5b                           | :wingless-related MMTV integration site 5B                                          | 2.83E-04 | NM_009525                                                           |
| 1100 | Pvr                             | :poliovirus receptor                                                                | 2.83E-04 | NM_027514                                                           |
| 1101 | Tjp2                            | :tight junction protein 2                                                           | 2.85E-04 | NM_011597                                                           |



|      |                          |                                                                                  |          |                                                              |
|------|--------------------------|----------------------------------------------------------------------------------|----------|--------------------------------------------------------------|
| 1102 | Gpr133                   | G protein-coupled receptor 133                                                   | 2.86E-04 | NM_001081342                                                 |
| 1103 | Kctd10                   | potassium channel tetramerisation domain containing 10                           | 2.86E-04 | NM_001159941 /// NM_026145                                   |
| 1104 | Pitpnc1                  | phosphatidylinositol transfer protein, cytoplasmic 1                             | 2.87E-04 | NM_145823                                                    |
| 1105 | Ppic                     | peptidylprolyl isomerase C                                                       | 2.87E-04 | NM_008908                                                    |
| 1106 | Hif1a                    | hypoxia inducible factor 1, alpha subunit                                        | 2.88E-04 | NM_010431                                                    |
| 1107 | Wdr75                    | WD repeat domain 75                                                              | 2.88E-04 | NM_028599                                                    |
| 1108 | ---                      | ---                                                                              | 2.90E-04 | ---                                                          |
| 1109 | Picalm                   | phosphatidylinositol binding clathrin assembly protein                           | 2.91E-04 | NM_146194                                                    |
| 1110 | S100a6                   | S100 calcium binding protein A6 (calcyclin)                                      | 2.91E-04 | NM_011313                                                    |
| 1111 | Osr1                     | odd-skipped related 1 (Drosophila)                                               | 2.92E-04 | NM_011859                                                    |
| 1112 | Pcdhb21                  | protocadherin beta 21                                                            | 2.94E-04 | NM_053146                                                    |
| 1113 | Rmi1                     | RMI1, RecQ mediated genome instability 1, homolog (S. cerevisiae)                | 2.94E-04 | NM_028904                                                    |
| 1114 | Hibadh                   | 3-hydroxyisobutyrate dehydrogenase                                               | 2.95E-04 | NM_145567                                                    |
| 1115 | Pip4k2a                  | phosphatidylinositol-5-phosphate 4-kinase, type II, alpha                        | 2.95E-04 | NM_008845                                                    |
| 1116 | Pdgfb                    | platelet derived growth factor, B polypeptide                                    | 2.95E-04 | NM_011057                                                    |
| 1117 | Plscr1                   | phospholipid scramblase 1                                                        | 2.95E-04 | NM_011636                                                    |
| 1118 | Abcc5                    | ATP-binding cassette, sub-family C (CFTR/MRP), member 5                          | 2.95E-04 | NM_013790 /// NM_176839                                      |
| 1119 | Chac1                    | ChaC, cation transport regulator-like 1 (E. coli)                                | 2.96E-04 | NM_026929                                                    |
| 1120 | Tmem115                  | transmembrane protein 115                                                        | 2.97E-04 | NM_019704                                                    |
| 1121 | Sdpr                     | serum deprivation response                                                       | 2.97E-04 | NM_138741                                                    |
| 1122 | Rabl3                    | RAB, member of RAS oncogene family-like 3                                        | 3.00E-04 | NM_001042499                                                 |
| 1123 | Upk3b                    | uroplakin 3B                                                                     | 3.02E-04 | NM_175309                                                    |
| 1124 | Gm9844 /// Tmsb10        | predicted gene 9844 /// thymosin, beta 10                                        | 3.02E-04 | NM_001039392 /// NM_025284 /// XM_001478515 /// XM_001480801 |
| 1125 | Trmt2a                   | TRM2 tRNA methyltransferase 2 homolog A (S. cerevisiae)                          | 3.04E-04 | NM_001080999 /// NM_001081000 /// NM_008307                  |
| 1126 | Cxcl16                   | chemokine (C-X-C motif) ligand 16                                                | 3.04E-04 | NM_023158                                                    |
| 1127 | Epb4.111                 | erythrocyte protein band 4.1-like 1                                              | 3.04E-04 | NM_001003815 /// NM_001006664 /// NM_013510                  |
| 1128 | Cd97                     | CD97 antigen                                                                     | 3.07E-04 | NM_001163029 /// NM_001163030 /// NM_001163031 /// NM_011925 |
| 1129 | 4933407N01Rik            | RIKEN cDNA 4933407N01 gene                                                       | 3.07E-04 | NM_025745                                                    |
| 1130 | Serf2                    | small EDRK-rich factor 2                                                         | 3.08E-04 | NM_011354                                                    |
| 1131 | Diap2                    | diaphanous homolog 2 (Drosophila)                                                | 3.12E-04 | NM_017398 /// NM_172493                                      |
| 1132 | Cd53                     | CD53 antigen                                                                     | 3.13E-04 | NM_007651                                                    |
| 1133 | Mfsd1                    | major facilitator superfamily domain containing 1                                | 3.16E-04 | NM_025813                                                    |
| 1134 | Ubr5                     | ubiquitin protein ligase E3 component n-recognin 5                               | 3.18E-04 | NM_001081359 /// NM_001112721                                |
| 1135 | Pstpip2                  | proline-serine-threonine phosphatase-interacting protein 2                       | 3.20E-04 | NM_013831                                                    |
| 1136 | Cd300lf /// LOC100047115 | CD300 antigen like family member F /// similar to CD300 antigen like family memb | 3.21E-04 | NM_145634 /// XR_033645                                      |
| 1137 | Ap2m1                    | adaptor protein complex AP-2, mu1                                                | 3.21E-04 | NM_009679                                                    |
| 1138 | 4930471M23Rik            | RIKEN cDNA 4930471M23 gene                                                       | 3.21E-04 | NM_175675                                                    |
| 1139 | St6gal1                  | beta galactoside alpha 2,6 sialyltransferase 1                                   | 3.22E-04 | NM_145933                                                    |
| 1140 | 4930579C15Rik            | RIKEN cDNA 4930579C15 gene                                                       | 3.23E-04 | NM_027089                                                    |
| 1141 | Tpm2                     | tropomyosin 2, beta                                                              | 3.23E-04 | NM_009416                                                    |
| 1142 | Rnf130                   | ring finger protein 130                                                          | 3.26E-04 | NM_021540                                                    |
| 1143 | Stx7                     | syntaxin 7                                                                       | 3.28E-04 | NM_016797                                                    |
| 1144 | Psen1                    | presenilin 1                                                                     | 3.30E-04 | NM_008943                                                    |
| 1145 | Slit3                    | slit homolog 3 (Drosophila)                                                      | 3.30E-04 | NM_011412                                                    |
| 1146 | Bnc1                     | basonuclin 1                                                                     | 3.31E-04 | NM_007562                                                    |
| 1147 | Klf13                    | Kruppel-like factor 13                                                           | 3.31E-04 | NM_021366                                                    |

|      |                                       |                                                                                  |          |                                                                            |
|------|---------------------------------------|----------------------------------------------------------------------------------|----------|----------------------------------------------------------------------------|
| 1148 | Mxra8                                 | matrix-remodelling associated 8                                                  | 3.31E-04 | NM_024263                                                                  |
| 1149 | Nap111                                | nucleosome assembly protein 1-like 1                                             | 3.32E-04 | NM_001146707 /// NM_015781                                                 |
| 1150 | Syne1                                 | synaptic nuclear envelope 1                                                      | 3.33E-04 | NM_001079686 /// NM_022027 /// NM_153399                                   |
| 1151 | Gnl2 /// LOC633966                    | guanine nucleotide binding protein-like 2 (nucleolar) /// similar to guanine nuc | 3.34E-04 | NM_145552 /// XM_908539                                                    |
| 1152 | Sel1l                                 | sel-1 suppressor of lin-12-like (C. elegans)                                     | 3.36E-04 | NM_001039089 /// NM_011344                                                 |
| 1153 | Hist1h4a /// Hist1h4b /// Hist1h4c    | histone cluster 1, H4a /// histone cluster 1, H4b /// histone cluster 1, H4c /// | 3.37E-04 | NM_153173 /// NM_175656 /// NM_175657 /// NM_178192 /// NM_178193 ///      |
| 1154 | Bgn                                   | biglycan                                                                         | 3.38E-04 | NM_007542                                                                  |
| 1155 | 2810055F11RIK                         | RIKEN cDNA 2810055F11 gene                                                       | 3.39E-04 | NM_026038                                                                  |
| 1156 | Mrpl15                                | mitochondrial ribosomal protein L15                                              | 3.39E-04 | NM_025300                                                                  |
| 1157 | Cndp2                                 | CNDP dipeptidase 2 (metallopeptidase M20 family)                                 | 3.39E-04 | NM_023149                                                                  |
| 1158 | Cxcl1                                 | chemokine (C-X-C motif) ligand 1                                                 | 3.41E-04 | NM_008176                                                                  |
| 1159 | Cp                                    | ceruloplasmin                                                                    | 3.41E-04 | NM_001042611 /// NM_007752                                                 |
| 1160 | Abhd3                                 | abhydrolase domain containing 3                                                  | 3.41E-04 | NM_134130                                                                  |
| 1161 | Ublcp1                                | ubiquitin-like domain containing CTD phosphatase 1                               | 3.42E-04 | NM_024475                                                                  |
| 1162 | Bicc1                                 | bicaudal C homolog 1 (Drosophila)                                                | 3.42E-04 | NM_031397                                                                  |
| 1163 | Pdxdc1                                | pyridoxal-dependent decarboxylase domain containing 1                            | 3.46E-04 | NM_001039533 /// NM_053181                                                 |
| 1164 | Trappc4                               | trafficking protein particle complex 4                                           | 3.46E-04 | NM_021789                                                                  |
| 1165 | Ubp1                                  | upstream binding protein 1                                                       | 3.47E-04 | NM_001083319 /// NM_013699                                                 |
| 1166 | Srp9                                  | signal recognition particle 9                                                    | 3.49E-04 | NM_012058                                                                  |
| 1167 | Msr1                                  | macrophage scavenger receptor 1                                                  | 3.50E-04 | NM_001113326 /// NM_031195                                                 |
| 1168 | H2-Aa                                 | histocompatibility 2, class II antigen A, alpha                                  | 3.51E-04 | NM_010378                                                                  |
| 1169 | Ube2d1                                | ubiquitin-conjugating enzyme E2D 1, UBC4/5 homolog (yeast)                       | 3.52E-04 | NM_145420                                                                  |
| 1170 | 7-Sep                                 | septin 7                                                                         | 3.52E-04 | NM_009859                                                                  |
| 1171 | Pla2g16                               | phospholipase A2, group XVI                                                      | 3.54E-04 | NM_139269                                                                  |
| 1172 | Dynll1 /// Gm6788                     | dynein light chain LC8-type 1 /// predicted gene 6788                            | 3.54E-04 | NM_019682 /// XM_892488 /// XM_913631                                      |
| 1173 | Tmem183a                              | transmembrane protein 183A                                                       | 3.56E-04 | NM_001042485 /// NM_020588                                                 |
| 1174 | Gm13305 /// Gm2002 /// Il11r1         | predicted gene 13305 /// predicted gene 2002 /// interleukin 11 receptor, alpha  | 3.59E-04 | NM_001099348 /// NM_001100596 /// NM_001163401 /// NM_010549 /// NM_010550 |
| 1175 | Itsn1                                 | intersectin 1 (SH3 domain protein 1A)                                            | 3.60E-04 | NM_001110275 /// NM_001110276 /// NM_010587                                |
| 1176 | Nelf                                  | nasal embryonic LHRH factor                                                      | 3.64E-04 | NM_001039386 /// NM_001039387 /// NM_020276                                |
| 1177 | Hist1h2ad /// Hist1h2an /// Hist1h2af | histone cluster 1, H2ad /// histone cluster 1, H2an /// histone cluster 2, H2aa1 | 3.68E-04 | NM_013549 /// NM_019469 /// NM_175662 /// NM_178184 /// NM_178188 ///      |
| 1178 | Car2                                  | carbonic anhydrase 2                                                             | 3.70E-04 | NM_009801                                                                  |
| 1179 | Insr                                  | insulin receptor                                                                 | 3.72E-04 | NM_001033381 /// NM_010568                                                 |
| 1180 | Ulk2                                  | Unc-51 like kinase 2 (C. elegans)                                                | 3.72E-04 | NM_013881                                                                  |
| 1181 | Hist1h1t                              | histone cluster 1, H1t                                                           | 3.73E-04 | NM_010377                                                                  |
| 1182 | Rab7l1                                | RAB7, member RAS oncogene family-like 1                                          | 3.74E-04 | NM_144875                                                                  |
| 1183 | Hip1                                  | huntingtin interacting protein 1                                                 | 3.76E-04 | NM_146001                                                                  |
| 1184 | Rpl14                                 | ribosomal protein L14                                                            | 3.76E-04 | NM_025974                                                                  |
| 1185 | Arf2                                  | ADP-ribosylation factor 2                                                        | 3.77E-04 | NM_007477                                                                  |
| 1186 | Lcp1                                  | lymphocyte cytosolic protein 1                                                   | 3.77E-04 | NM_008879                                                                  |
| 1187 | Cox5a                                 | cytochrome c oxidase, subunit Va                                                 | 3.78E-04 | NM_007747                                                                  |
| 1188 | Rusc1                                 | RUN and SH3 domain containing 1                                                  | 3.78E-04 | NM_001083807 /// NM_001083808 /// NM_028188                                |
| 1189 | Nrip1                                 | nuclear receptor interacting protein 1                                           | 3.81E-04 | NM_173440                                                                  |
| 1190 | Serpinb6a                             | serine (or cysteine) peptidase inhibitor, clade B, member 6a                     | 3.82E-04 | NM_001164117 /// NM_001164118 /// NM_009254 /// NR_028309                  |
| 1191 | Upk3b                                 | uroplakin 3B                                                                     | 3.82E-04 | NM_175309                                                                  |
| 1192 | Klf4                                  | Kruppel-like factor 4 (gut)                                                      | 3.83E-04 | NM_010637                                                                  |
| 1193 | Myb                                   | myeloblastosis oncogene                                                          | 3.84E-04 | NM_010848                                                                  |

|      |                          |                                                                                  |          |                                                                     |
|------|--------------------------|----------------------------------------------------------------------------------|----------|---------------------------------------------------------------------|
| 1194 | Ccdc71                   | coiled-coil domain containing 71                                                 | 3.85E-04 | NM_133744                                                           |
| 1195 | Ube2d3                   | ubiquitin-conjugating enzyme E2D 3 (UBC4/5 homolog, yeast)                       | 3.86E-04 | NM_025356                                                           |
| 1196 | Car12                    | carbonic anhydrase 12                                                            | 3.89E-04 | NM_178396                                                           |
| 1197 | Msln                     | mesothelin                                                                       | 3.89E-04 | NM_018857                                                           |
| 1198 | Mobk13                   | MOB1, Mps One Binder Kinase activator-like 3 (yeast)                             | 3.90E-04 | NM_025283                                                           |
| 1199 | Txndc17                  | thioredoxin domain containing 17                                                 | 3.91E-04 | NM_026559                                                           |
| 1200 | Ehd1                     | EH-domain containing 1                                                           | 3.92E-04 | NM_010119                                                           |
| 1201 | Cpeb3                    | cytoplasmic polyadenylation element binding protein 3                            | 3.93E-04 | NM_198300                                                           |
| 1202 | Dnmt1                    | DNA methyltransferase (cytosine-5) 1                                             | 3.93E-04 | NM_010066                                                           |
| 1203 | Marcks                   | myristoylated alanine rich protein kinase C substrate                            | 3.94E-04 | NM_008538                                                           |
| 1204 | Mgl1                     | macrophage galactose N-acetyl-galactosamine specific lectin 1                    | 3.95E-04 | NM_010796                                                           |
| 1205 | Sdc4                     | syndecan 4                                                                       | 3.96E-04 | NM_011521                                                           |
| 1206 | Brdt                     | bromodomain, testis-specific                                                     | 3.97E-04 | NM_001079873 /// NM_054054                                          |
| 1207 | Laptm5                   | lysosomal-associated protein transmembrane 5                                     | 3.97E-04 | NM_010686                                                           |
| 1208 | Nsg2                     | neuron specific gene family member 2                                             | 3.98E-04 | NM_008741                                                           |
| 1209 | Vti1b                    | vesicle transport through interaction with t-SNAREs 1B homolog                   | 3.99E-04 | NM_016800                                                           |
| 1210 | Gsn                      | gelsolin                                                                         | 4.02E-04 | NM_146120                                                           |
| 1211 | Mat2a                    | methionine adenosyltransferase II, alpha                                         | 4.04E-04 | NM_145569                                                           |
| 1212 | C3ar1                    | complement component 3a receptor 1                                               | 4.05E-04 | NM_009779                                                           |
| 1213 | Hif1a                    | hypoxia inducible factor 1, alpha subunit                                        | 4.05E-04 | NM_010431                                                           |
| 1214 | Hsd3b7                   | hydroxy-delta-5-steroid dehydrogenase, 3 beta- and steroid delta-isomerase 7     | 4.05E-04 | NM_001040684 /// NM_133943                                          |
| 1215 | Mobk11b                  | MOB1, Mps One Binder Kinase activator-like 1B (yeast)                            | 4.06E-04 | NM_145571                                                           |
| 1216 | Ankzf1                   | ankyrin repeat and zinc finger domain containing 1                               | 4.06E-04 | NM_026187                                                           |
| 1217 | Sel1l                    | sel-1 suppressor of lin-12-like (C. elegans)                                     | 4.09E-04 | NM_001039089 /// NM_011344                                          |
| 1218 | Kat2b                    | K(lysine) acetyltransferase 2B                                                   | 4.10E-04 | NM_020005                                                           |
| 1219 | Prkca                    | protein kinase C, alpha                                                          | 4.13E-04 | NM_011101                                                           |
| 1220 | Myo1f                    | myosin IF                                                                        | 4.14E-04 | NM_053214                                                           |
| 1221 | Dgat2                    | diacylglycerol O-acyltransferase 2                                               | 4.15E-04 | NM_026384                                                           |
| 1222 | Top3b                    | topoisomerase (DNA) III beta                                                     | 4.16E-04 | NM_011624                                                           |
| 1223 | Arhgef3                  | Rho guanine nucleotide exchange factor (GEF) 3                                   | 4.21E-04 | NM_027871                                                           |
| 1224 | Igfbp7                   | insulin-like growth factor binding protein 7                                     | 4.23E-04 | NM_001159518 /// NM_008048                                          |
| 1225 | Igfbp4                   | insulin-like growth factor binding protein 4                                     | 4.23E-04 | NM_010517                                                           |
| 1226 | Nrp2                     | neuropilin 2                                                                     | 4.24E-04 | NM_001077403 /// NM_001077404 /// NM_001077405 /// NM_001077406 /// |
| 1227 | Ermp1                    | endoplasmic reticulum metalloproteinase 1                                        | 4.24E-04 | NM_001081213                                                        |
| 1228 | Rpgr /// SrpX            | retinitis pigmentosa GTPase regulator /// sushi-repeat-containing protein        | 4.25E-04 | NM_011285 /// NM_016911                                             |
| 1229 | LOC100047091 /// Tmem163 | hypothetical protein LOC100047091 /// transmembrane protein 163                  | 4.27E-04 | NM_028135 /// XM_001477366                                          |
| 1230 | Et14                     | enhancer trap locus 4                                                            | 4.29E-04 | NM_001081006                                                        |
| 1231 | Ifih1                    | interferon induced with helicase C domain 1                                      | 4.32E-04 | NM_001164477 /// NM_027835                                          |
| 1232 | Nfu1                     | NFU1 iron-sulfur cluster scaffold homolog (S. cerevisiae)                        | 4.32E-04 | NM_020045                                                           |
| 1233 | Spnb2                    | spectrin beta 2                                                                  | 4.32E-04 | NM_009260 /// NM_175836                                             |
| 1234 | Capg                     | capping protein (actin filament), gelsolin-like                                  | 4.35E-04 | NM_001042534 /// NM_007599                                          |
| 1235 | Gm9803 /// Magmas        | predicted gene 9803 /// mitochondria-associated protein involved in granulocyte- | 4.35E-04 | NM_025571 /// XM_001477683 /// XM_001477838                         |
| 1236 | Tnfaip1                  | tumor necrosis factor, alpha-induced protein 1 (endothelial)                     | 4.35E-04 | NM_001159392 /// NM_009395                                          |
| 1237 | Hnrnpa1                  | heterogeneous nuclear ribonucleoprotein A1                                       | 4.36E-04 | NM_001039129 /// NM_010447                                          |
| 1238 | Ttc19                    | tetratricopeptide repeat domain 19                                               | 4.37E-04 | NM_028360 /// NM_029704                                             |
| 1239 | Cp                       | ceruloplasmin                                                                    | 4.39E-04 | NM_001042611 /// NM_007752                                          |

|      |                   |                                                                                  |          |                                                                     |
|------|-------------------|----------------------------------------------------------------------------------|----------|---------------------------------------------------------------------|
| 1240 | Abca3             | ATP-binding cassette, sub-family A (ABC1), member 3                              | 4.39E-04 | NM_001039581 /// NM_013855                                          |
| 1241 | Selplg            | selectin, platelet (p-selectin) ligand                                           | 4.40E-04 | NM_009151                                                           |
| 1242 | Mmp3              | matrix metalloproteinase 3                                                       | 4.42E-04 | NM_010809                                                           |
| 1243 | Tanc1             | tetratricopeptide repeat, ankyrin repeat and coiled-coil containing 1            | 4.42E-04 | NM_198294                                                           |
| 1244 | Plac8             | placenta-specific 8                                                              | 4.42E-04 | NM_139198                                                           |
| 1245 | Gm12617           | predicted gene 12617                                                             | 4.43E-04 | XM_001000017                                                        |
| 1246 | C730025P13Rik     | RIKEN cDNA C730025P13 gene                                                       | 4.44E-04 | NM_177344                                                           |
| 1247 | Gmfg              | glia maturation factor, gamma                                                    | 4.44E-04 | NM_001039192 /// NM_022024                                          |
| 1248 | Ndst1             | N-deacetylase/N-sulfotransferase (heparan glucosaminyl) 1                        | 4.46E-04 | NM_008306                                                           |
| 1249 | LOC676654 /// Lyn | similar to Yamaguchi sarcoma viral (v-yes-1) oncogene homolog /// Yamaguchi sarc | 4.48E-04 | NM_001111096 /// NM_010747 /// XM_991890                            |
| 1250 | Cdca7             | cell division cycle associated 7                                                 | 4.48E-04 | NM_025866                                                           |
| 1251 | Ovgp1             | oviductal glycoprotein 1                                                         | 4.53E-04 | NM_007696                                                           |
| 1252 | Fxyd5             | FXD domain-containing ion transport regulator 5                                  | 4.53E-04 | NM_001111073 /// NM_008761                                          |
| 1253 | Unc13b            | unc-13 homolog B (C. elegans)                                                    | 4.56E-04 | NM_001081413                                                        |
| 1254 | 2310044H10Rik     | RIKEN cDNA 2310044H10 gene                                                       | 4.56E-04 | NM_197991                                                           |
| 1255 | Cdo1              | cysteine dioxygenase 1, cytosolic                                                | 4.57E-04 | NM_033037                                                           |
| 1256 | Rab23             | RAB23, member RAS oncogene family                                                | 4.57E-04 | NM_001159729 /// NM_008999                                          |
| 1257 | Bgn               | biglycan                                                                         | 4.59E-04 | NM_007542                                                           |
| 1258 | Igfbp4            | insulin-like growth factor binding protein 4                                     | 4.61E-04 | NM_010517                                                           |
| 1259 | Foxp1             | forkhead box P1                                                                  | 4.62E-04 | NM_053202                                                           |
| 1260 | Sparcl1           | SPARC-like 1                                                                     | 4.64E-04 | NM_010097                                                           |
| 1261 | Abcc5             | ATP-binding cassette, sub-family C (CFTR/MRP), member 5                          | 4.65E-04 | NM_013790 /// NM_176839                                             |
| 1262 | Arhgap24          | Rho GTPase activating protein 24                                                 | 4.66E-04 | NM_029270 /// NM_146161                                             |
| 1263 | Lphn1             | latrophilin 1                                                                    | 4.67E-04 | NM_181039                                                           |
| 1264 | Tmem38b           | transmembrane protein 38B                                                        | 4.71E-04 | NM_028053                                                           |
| 1265 | Hdlbp             | high density lipoprotein (HDL) binding protein                                   | 4.73E-04 | NM_133808                                                           |
| 1266 | Mettl9            | methyltransferase like 9                                                         | 4.74E-04 | NM_021554                                                           |
| 1267 | Ctca2             | chloride channel calcium activated 2                                             | 4.77E-04 | NM_030601                                                           |
| 1268 | Cd151             | CD151 antigen                                                                    | 4.77E-04 | NM_001111049 /// NM_001111050 /// NM_009842                         |
| 1269 | Gimap4            | GTPase, IMAP family member 4                                                     | 4.79E-04 | NM_174990 /// NM_175048                                             |
| 1270 | Phlda1            | pleckstrin homology-like domain, family A, member 1                              | 4.81E-04 | NM_009344                                                           |
| 1271 | Stard5            | STAR-related lipid transfer (START) domain containing 5                          | 4.82E-04 | NM_023377                                                           |
| 1272 | Manba             | mannosidase, beta A, lysosomal                                                   | 4.83E-04 | NM_027288                                                           |
| 1273 | Nucks1            | nuclear casein kinase and cyclin-dependent kinase substrate 1                    | 4.88E-04 | NM_001145804 /// NM_175294                                          |
| 1274 | Tsn               | translin                                                                         | 4.88E-04 | NM_011650                                                           |
| 1275 | Tubb5             | tubulin, beta 5                                                                  | 4.90E-04 | NM_011655                                                           |
| 1276 | Aldoa             | aldolase A, fructose-bisphosphate                                                | 4.93E-04 | NM_007438                                                           |
| 1277 | Ubxn6             | UBX domain protein 6                                                             | 4.95E-04 | NM_024432                                                           |
| 1278 | Rab34             | RAB34, member of RAS oncogene family                                             | 4.96E-04 | NM_001159482 /// NM_033475                                          |
| 1279 | Tdgf1             | teratocarcinoma-derived growth factor 1                                          | 4.97E-04 | NM_011562                                                           |
| 1280 | Pygl              | liver glycogen phosphorylase                                                     | 4.97E-04 | NM_133198                                                           |
| 1281 | Spg20             | spastic paraplegia 20, spartin (Troyer syndrome) homolog (human)                 | 4.97E-04 | NM_001144987 /// NM_001144988 /// NM_144895                         |
| 1282 | Nfx1              | nuclear transcription factor, X-box binding 1                                    | 5.00E-04 | NM_023739                                                           |
| 1283 | Tpd52             | tumor protein D52                                                                | 5.03E-04 | NM_001025261 /// NM_001025262 /// NM_001025263 /// NM_001025264 /// |
| 1284 | 1500035H01Rik     | RIKEN cDNA 1500035H01 gene                                                       | 5.03E-04 | NM_023831                                                           |
| 1285 | Pbx1              | pre B-cell leukemia transcription factor 1                                       | 5.03E-04 | NM_008783 /// NM_183355                                             |

|      |                                 |                                                                                                                                    |          |                                                                                   |
|------|---------------------------------|------------------------------------------------------------------------------------------------------------------------------------|----------|-----------------------------------------------------------------------------------|
| 1286 | Tulp3                           | tubby-like protein 3                                                                                                               | 5.04E-04 | NM_011657                                                                         |
| 1287 | Epn1                            | epsin 1                                                                                                                            | 5.04E-04 | NM_010147                                                                         |
| 1288 | Zcchc3                          | zinc finger, CCHC domain containing 3                                                                                              | 5.07E-04 | NM_175126                                                                         |
| 1289 | Klf9                            | Kruppel-like factor 9                                                                                                              | 5.09E-04 | NM_010638 /// XM_001479552                                                        |
| 1290 | AI324046 /// Igh /// Igh-6 ///  | expressed sequence AI324046 /// immunoglobulin heavy chain complex /// immunoglobulin heavy chain complex                          | 5.10E-04 | XM_001473588 /// XM_001473698 /// XM_001477926 /// XM_001477938 ///               |
| 1291 | Tcerg1                          | transcription elongation regulator 1 (CA150)                                                                                       | 5.10E-04 | NM_001039474                                                                      |
| 1292 | Ahcy12                          | S-adenosylhomocysteine hydrolase-like 2                                                                                            | 5.11E-04 | NM_021414                                                                         |
| 1293 | Lima1                           | LIM domain and actin binding 1                                                                                                     | 5.13E-04 | NM_001113545 /// NM_023063                                                        |
| 1294 | Sema4g                          | sema domain, immunoglobulin domain (Ig), transmembrane domain (TM) and short cytoplasmic tail                                      | 5.14E-04 | NM_011976                                                                         |
| 1295 | Plau                            | plasminogen activator, urokinase                                                                                                   | 5.16E-04 | NM_008873                                                                         |
| 1296 | Bgn                             | biglycan                                                                                                                           | 5.16E-04 | NM_007542                                                                         |
| 1297 | Ceacam10                        | carcinoembryonic antigen-related cell adhesion molecule 10                                                                         | 5.19E-04 | NM_007675                                                                         |
| 1298 | Alg9                            | asparagine-linked glycosylation 9 homolog (yeast, alpha 1,2 mannosyltransferase)                                                   | 5.20E-04 | NM_133981                                                                         |
| 1299 | Zfp87                           | zinc finger protein 87                                                                                                             | 5.21E-04 | NM_133228                                                                         |
| 1300 | Gm6159 /// Hnrnpr               | predicted gene 6159 /// heterogeneous nuclear ribonucleoprotein R                                                                  | 5.21E-04 | NM_028871 /// XR_030753                                                           |
| 1301 | P1xdc1                          | plexin domain containing 1                                                                                                         | 5.22E-04 | NM_001163608 /// NM_028199                                                        |
| 1302 | Ncbp2                           | nuclear cap binding protein subunit 2                                                                                              | 5.25E-04 | NM_026554                                                                         |
| 1303 | Clcc1                           | chloride channel CLIC-like 1                                                                                                       | 5.25E-04 | NM_145543                                                                         |
| 1304 | Tram1                           | translocating chain-associating membrane protein 1                                                                                 | 5.26E-04 | NM_028173                                                                         |
| 1305 | Mrpl44                          | mitochondrial ribosomal protein L44                                                                                                | 5.26E-04 | NM_001081210                                                                      |
| 1306 | Tubb2a                          | tubulin, beta 2A                                                                                                                   | 5.27E-04 | NM_009450                                                                         |
| 1307 | Rpl37a                          | ribosomal protein L37a                                                                                                             | 5.28E-04 | NM_009084                                                                         |
| 1308 | Metap2                          | methionine aminopeptidase 2                                                                                                        | 5.28E-04 | NM_019648                                                                         |
| 1309 | Tmem71                          | transmembrane protein 71                                                                                                           | 5.28E-04 | NM_172514                                                                         |
| 1310 | Snrpa                           | small nuclear ribonucleoprotein polypeptide A                                                                                      | 5.29E-04 | NM_001046637 /// NM_015782                                                        |
| 1311 | Adh5                            | alcohol dehydrogenase 5 (class III), chi polypeptide                                                                               | 5.29E-04 | NM_007410                                                                         |
| 1312 | ---                             | ---                                                                                                                                | 5.30E-04 | ---                                                                               |
| 1313 | Spg11                           | spastic paraplegia 11                                                                                                              | 5.31E-04 | NM_145531 /// XM_904251                                                           |
| 1314 | Snai2                           | snail homolog 2 (Drosophila)                                                                                                       | 5.32E-04 | NM_011415                                                                         |
| 1315 | Entpd1                          | ectonucleoside triphosphate diphosphohydrolase 1                                                                                   | 5.33E-04 | NM_009848                                                                         |
| 1316 | Slc35a5                         | solute carrier family 35, member A5                                                                                                | 5.34E-04 | NM_028756                                                                         |
| 1317 | Cluap1                          | clusterin associated protein 1                                                                                                     | 5.35E-04 | NM_029738                                                                         |
| 1318 | Ucp2                            | uncoupling protein 2 (mitochondrial, proton carrier)                                                                               | 5.36E-04 | NM_011671                                                                         |
| 1319 | Cebpd                           | CCAAT/enhancer binding protein (C/EBP), delta                                                                                      | 5.39E-04 | NM_007679                                                                         |
| 1320 | Raver1                          | ribonucleoprotein, PTB-binding 1                                                                                                   | 5.41E-04 | NM_027911                                                                         |
| 1321 | Tmem176a                        | transmembrane protein 176A                                                                                                         | 5.42E-04 | NM_001098271 /// NM_025326                                                        |
| 1322 | Dmx11                           | Dmx-like 1                                                                                                                         | 5.45E-04 | NM_001081371                                                                      |
| 1323 | Ddx5                            | DEAD (Asp-Glu-Ala-Asp) box polypeptide 5                                                                                           | 5.45E-04 | NM_007840                                                                         |
| 1324 | Map3k7                          | mitogen-activated protein kinase kinase kinase 7                                                                                   | 5.45E-04 | NM_009316 /// NM_172688                                                           |
| 1325 | Gm13342 /// Gm15776 /// Gm13342 | predicted gene 13342 /// predicted gene 15776 /// predicted gene 3150 /// guanine nucleotide binding protein (GTP-binding) gamma 1 | 5.46E-04 | NM_010318 /// XM_001472269 /// XM_001474885 /// XM_001475494 /// XM_001475495 /// |
| 1326 | 6720475J19RIK                   | RIKEN cDNA 6720475J19 gene                                                                                                         | 5.46E-04 | XM_001474896 /// XM_001481296                                                     |
| 1327 | Akr1c13                         | aldo-keto reductase family 1, member C13                                                                                           | 5.47E-04 | NM_013778                                                                         |
| 1328 | Mbp                             | myelin basic protein                                                                                                               | 5.49E-04 | NM_001025245 /// NM_001025251 /// NM_001025254 /// NM_001025255 ///               |
| 1329 | Cox19                           | COX19 cytochrome c oxidase assembly homolog (S. cerevisiae)                                                                        | 5.49E-04 | NM_197980                                                                         |
| 1330 | Phb2                            | prohibitin 2                                                                                                                       | 5.49E-04 | NM_007531                                                                         |
| 1331 | Tnks2                           | tankyrase, TRF1-interacting ankyrin-related ADP-ribose polymerase 2                                                                | 5.50E-04 | NM_001163635 /// XM_001000101 /// XM_917270                                       |

|      |                                     |                                                                                  |          |                                                                               |
|------|-------------------------------------|----------------------------------------------------------------------------------|----------|-------------------------------------------------------------------------------|
| 1332 | Tceb1                               | transcription elongation factor B (SII1), polypeptide 1                          | 5.52E-04 | NM_026456                                                                     |
| 1333 | Ifi202b                             | interferon activated gene 202B                                                   | 5.52E-04 | NM_008327 /// NM_011940                                                       |
| 1334 | Lgals1                              | lectin, galactose binding, soluble 1                                             | 5.54E-04 | NM_008495                                                                     |
| 1335 | Wdr48                               | WD repeat domain 48                                                              | 5.56E-04 | NM_026236                                                                     |
| 1336 | Il6st                               | interleukin 6 signal transducer                                                  | 5.57E-04 | NM_010560                                                                     |
| 1337 | Fhod3                               | formin homology 2 domain containing 3                                            | 5.60E-04 | NM_175276                                                                     |
| 1338 | Ppp6c                               | protein phosphatase 6, catalytic subunit                                         | 5.62E-04 | NM_024209                                                                     |
| 1339 | Rps21                               | ribosomal protein S21                                                            | 5.62E-04 | NM_025587                                                                     |
| 1340 | Elof1                               | elongation factor 1 homolog (ELF1, S. cerevisiae)                                | 5.63E-04 | NM_170777                                                                     |
| 1341 | Spes1                               | signal peptidase complex subunit 1 homolog (S. cerevisiae)                       | 5.65E-04 | NM_026911                                                                     |
| 1342 | Tgtp /// Tgtp2                      | T-cell specific GTPase /// T-cell specific GTPase 2                              | 5.66E-04 | NM_001145164 /// NM_011579 /// XR_031267                                      |
| 1343 | Ncbp2                               | nuclear cap binding protein subunit 2                                            | 5.68E-04 | NM_026554                                                                     |
| 1344 | Gm5931 /// Ube2l                    | ubiquitin-conjugating enzyme E2I pseudogene /// ubiquitin-conjugating enzyme E2I | 5.69E-04 | NM_011665 /// XM_620954 /// XM_980111                                         |
| 1345 | Fkbp15                              | FK506 binding protein 15                                                         | 5.69E-04 | NM_001045528 /// XM_485391 /// XM_982256                                      |
| 1346 | Lats2                               | large tumor suppressor 2                                                         | 5.74E-04 | NM_015771 /// NM_153382                                                       |
| 1347 | Csmd1                               | CUB and Sushi multiple domains 1                                                 | 5.75E-04 | NM_053171                                                                     |
| 1348 | Ivns1abp                            | influenza virus NS1A binding protein                                             | 5.77E-04 | NM_001039511 /// NM_001039512 /// NM_054102                                   |
| 1349 | Ipo4                                | importin 4                                                                       | 5.80E-04 | NM_024267                                                                     |
| 1350 | ---                                 | ---                                                                              | 5.80E-04 | ---                                                                           |
| 1351 | Pdgfc                               | platelet-derived growth factor, C polypeptide                                    | 5.82E-04 | NM_019971                                                                     |
| 1352 | Rnft1                               | ring finger protein, transmembrane 1                                             | 5.83E-04 | NM_029788                                                                     |
| 1353 | 2010204K13Rik                       | RIKEN cDNA 2010204K13 gene                                                       | 5.86E-04 | NR_027924 /// NR_027925 /// XR_035367                                         |
| 1354 | Stat5a                              | signal transducer and activator of transcription 5A                              | 5.87E-04 | NM_001164062 /// NM_011488                                                    |
| 1355 | Clec4e                              | C-type lectin domain family 4, member e                                          | 5.88E-04 | NM_019948                                                                     |
| 1356 | B230219D22Rik                       | RIKEN cDNA B230219D22 gene                                                       | 5.88E-04 | NM_181278                                                                     |
| 1357 | Fam107b                             | family with sequence similarity 107, member B                                    | 5.88E-04 | NM_025626                                                                     |
| 1358 | Mfsd4                               | major facilitator superfamily domain containing 4                                | 5.92E-04 | NM_001114662 /// NM_172510                                                    |
| 1359 | Fcgr1                               | Fc receptor, IgG, high affinity I                                                | 5.95E-04 | NM_010186                                                                     |
| 1360 | Nab1                                | Ngfi-A binding protein 1                                                         | 5.97E-04 | NM_008667                                                                     |
| 1361 | Sulf2                               | sulfatase 2                                                                      | 5.99E-04 | NM_028072                                                                     |
| 1362 | Rps11                               | ribosomal protein S11                                                            | 6.00E-04 | NM_013725                                                                     |
| 1363 | Bid                                 | BH3 interacting domain death agonist                                             | 6.02E-04 | NM_007544                                                                     |
| 1364 | C1qa                                | complement component 1, q subcomponent, alpha polypeptide                        | 6.03E-04 | NM_007572                                                                     |
| 1365 | Gm13611 /// Gm4604 /// LOC100287211 | predicted gene 13611 /// predicted gene 4604 /// similar to Rpl36 protein /// ri | 6.04E-04 | NM_018730 /// XM_001480072 /// XM_001480721 /// XM_001480806 /// XM_001480807 |
| 1366 | Sik                                 | STE20-like kinase (yeast)                                                        | 6.05E-04 | NM_009289                                                                     |
| 1367 | Cp                                  | ceruloplasmin                                                                    | 6.07E-04 | NM_001042611 /// NM_007752                                                    |
| 1368 | Nktr                                | natural killer tumor recognition sequence                                        | 6.09E-04 | NM_010918                                                                     |
| 1369 | Ctsd                                | cathepsin D                                                                      | 6.10E-04 | NM_009983                                                                     |
| 1370 | Gja1                                | gap junction protein, alpha 1                                                    | 6.11E-04 | NM_010288                                                                     |
| 1371 | Ly6a                                | lymphocyte antigen 6 complex, locus A                                            | 6.13E-04 | NM_010738                                                                     |
| 1372 | Mycs                                | myc-like oncogene, s-myc protein                                                 | 6.13E-04 | NM_010850                                                                     |
| 1373 | Wdr45                               | WD repeat domain 45                                                              | 6.15E-04 | NM_172372                                                                     |
| 1374 | 1810063B07Rik                       | RIKEN cDNA 1810063B07 gene                                                       | 6.19E-04 | NM_026209 /// XM_907029 /// XM_973341                                         |
| 1375 | Nov                                 | nephroblastoma overexpressed gene                                                | 6.19E-04 | NM_010930                                                                     |
| 1376 | Tek                                 | endothelial-specific receptor tyrosine kinase                                    | 6.25E-04 | NM_013690                                                                     |
| 1377 | Nek7                                | NIMA (never in mitosis gene a)-related expressed kinase 7                        | 6.25E-04 | NM_021605                                                                     |

|      |          |                                                                              |          |                                                                     |
|------|----------|------------------------------------------------------------------------------|----------|---------------------------------------------------------------------|
| 1378 | Tbrg1    | transforming growth factor beta regulated gene 1                             | 6.26E-04 | NM_025289                                                           |
| 1379 | Casp4    | caspase 4, apoptosis-related cysteine peptidase                              | 6.27E-04 | NM_007609                                                           |
| 1380 | Repin1   | replication initiator 1                                                      | 6.27E-04 | NM_001079901 /// NM_001079902 /// NM_001079903 /// NM_001079904 /// |
| 1381 | Blvra    | biliverdin reductase A                                                       | 6.28E-04 | NM_026678                                                           |
| 1382 | Pcmt1    | protein-L-isoaspartate (D-aspartate) O-methyltransferase domain containing 1 | 6.28E-04 | NM_183028                                                           |
| 1383 | Pigc     | phosphatidylinositol glycan anchor biosynthesis, class C                     | 6.29E-04 | NM_001039045 /// NM_026078                                          |
| 1384 | BC013712 | cDNA sequence BC013712                                                       | 6.29E-04 | NM_001033308                                                        |
| 1385 | Gm568    | predicted gene 568                                                           | 6.29E-04 | ---                                                                 |
| 1386 | Erlin1   | ER lipid raft associated 1                                                   | 6.30E-04 | NM_001164359 /// NM_001164360 /// NM_145502                         |
| 1387 | Rab14    | RAB14, member RAS oncogene family                                            | 6.31E-04 | NM_026697                                                           |
| 1388 | Zfp445   | zinc finger protein 445                                                      | 6.31E-04 | NM_173364                                                           |
| 1389 | Tbc1d10a | TBC1 domain family, member 10a                                               | 6.33E-04 | NM_134023                                                           |
| 1390 | Serpnb1a | serine (or cysteine) peptidase inhibitor, clade B, member 1a                 | 6.33E-04 | NM_025429                                                           |
| 1391 | Apobec1  | apolipoprotein B mRNA editing enzyme, catalytic polypeptide 1                | 6.34E-04 | NM_001134391 /// NM_031159                                          |
| 1392 | Pcdhb9   | protocadherin beta 9                                                         | 6.41E-04 | NM_053134                                                           |
| 1393 | Erc1     | ELKS/RAB6-interacting/CAST family member 1                                   | 6.43E-04 | NM_053204 /// NM_178085                                             |
| 1394 | Nudt13   | nudix (nucleoside diphosphate linked moiety X)-type motif 13                 | 6.45E-04 | NM_026341                                                           |
| 1395 | Bnip2    | BCL2/adenovirus E1B interacting protein 2                                    | 6.47E-04 | NM_001008238 /// NM_016787                                          |
| 1396 | Il1rn    | interleukin 1 receptor antagonist                                            | 6.49E-04 | NM_001039701 /// NM_001159562 /// NM_031167                         |
| 1397 | Serf2    | small EDRK-rich factor 2                                                     | 6.50E-04 | NM_011354                                                           |
| 1398 | Trim47   | tripartite motif-containing 47                                               | 6.52E-04 | NM_172570                                                           |
| 1399 | Osbpl9   | oxysterol binding protein-like 9                                             | 6.55E-04 | NM_001134791 /// NM_133885 /// NM_173350                            |
| 1400 | Rnasel   | ribonuclease L (2', 5'-oligoadenylate synthetase-dependent)                  | 6.57E-04 | NM_011882                                                           |
| 1401 | Csnk2a2  | casein kinase 2, alpha prime polypeptide                                     | 6.58E-04 | NM_009974                                                           |
| 1402 | Sparc    | secreted acidic cysteine rich glycoprotein                                   | 6.60E-04 | NM_009242                                                           |
| 1403 | Tfrc     | transferrin receptor                                                         | 6.61E-04 | NM_011638                                                           |
| 1404 | Cdh2     | cadherin 2                                                                   | 6.61E-04 | NM_007664                                                           |
| 1405 | Txn2     | thioredoxin 2                                                                | 6.62E-04 | NM_019913                                                           |
| 1406 | Eri3     | exoribonuclease 3                                                            | 6.62E-04 | NM_080469                                                           |
| 1407 | Pck2     | phosphoenolpyruvate carboxykinase 2 (mitochondrial)                          | 6.65E-04 | NM_028994                                                           |
| 1408 | Il1b     | interleukin 1 beta                                                           | 6.68E-04 | NM_008361                                                           |
| 1409 | Ncam1    | neural cell adhesion molecule 1                                              | 6.69E-04 | NM_001081445 /// NM_001113204 /// NM_010875                         |
| 1410 | Anp32e   | acidic (leucine-rich) nuclear phosphoprotein 32 family, member E             | 6.70E-04 | NM_023210                                                           |
| 1411 | Laptm4b  | lysosomal-associated protein transmembrane 4B                                | 6.70E-04 | NM_033521                                                           |
| 1412 | Gba      | glucosidase, beta, acid                                                      | 6.71E-04 | NM_001077411 /// NM_008094                                          |
| 1413 | Rnasel   | ribonuclease L (2', 5'-oligoadenylate synthetase-dependent)                  | 6.71E-04 | NM_011882                                                           |
| 1414 | Cct2     | chaperonin containing Tcp1, subunit 2 (beta)                                 | 6.72E-04 | NM_007636                                                           |
| 1415 | Ndufs4   | NADH dehydrogenase (ubiquinone) Fe-S protein 4                               | 6.83E-04 | NM_010887                                                           |
| 1416 | Hap1     | huntingtin-associated protein 1                                              | 6.87E-04 | NM_010404 /// NM_177981                                             |
| 1417 | Tmem185b | transmembrane protein 185B                                                   | 6.88E-04 | NM_146103                                                           |
| 1418 | Atxn7l1  | ataxin 7-like 1                                                              | 6.90E-04 | NM_001033436 /// NM_028139                                          |
| 1419 | Wfs1     | Wolfram syndrome 1 homolog (human)                                           | 6.93E-04 | NM_011716                                                           |
| 1420 | Tex15    | testis expressed gene 15                                                     | 6.96E-04 | NM_031374                                                           |
| 1421 | Timp3    | tissue inhibitor of metalloproteinase 3                                      | 6.97E-04 | NM_011595                                                           |
| 1422 | Hira     | histone cell cycle regulation defective homolog A (S. cerevisiae)            | 6.98E-04 | NM_010435                                                           |
| 1423 | Leprot   | leptin receptor overlapping transcript                                       | 6.99E-04 | NM_175036                                                           |

|      |           |                                                                                  |          |                                                                               |
|------|-----------|----------------------------------------------------------------------------------|----------|-------------------------------------------------------------------------------|
| 1424 | Psrc1     | proline/serine-rich coiled-coil 1                                                | 7.04E-04 | NM_019976                                                                     |
| 1425 | Prkra     | protein kinase, interferon inducible double stranded RNA dependent activator     | 7.07E-04 | NM_011871                                                                     |
| 1426 | Lmbr1     | limb region 1                                                                    | 7.07E-04 | NM_020295                                                                     |
| 1427 | Pkd2      | polycystic kidney disease 2                                                      | 7.10E-04 | NM_008861                                                                     |
| 1428 | Trappc10  | trafficking protein particle complex 10                                          | 7.11E-04 | NM_001081055                                                                  |
| 1429 | Luzp1     | leucine zipper protein 1                                                         | 7.11E-04 | NM_024452                                                                     |
| 1430 | Gmppa     | GDP-mannose pyrophosphorylase A                                                  | 7.13E-04 | NM_133708                                                                     |
| 1431 | Tspyl4    | TSPY-like 4                                                                      | 7.13E-04 | NM_030203                                                                     |
| 1432 | Cdk5rap1  | CDK5 regulatory subunit associated protein 1                                     | 7.13E-04 | NM_025876                                                                     |
| 1433 | Gatad2a   | GATA zinc finger domain containing 2A                                            | 7.14E-04 | NM_001113345 /// NM_001113346 /// NM_145596                                   |
| 1434 | Anapc5    | anaphase-promoting complex subunit 5                                             | 7.15E-04 | NM_001042491 /// NM_021505                                                    |
| 1435 | Nub1      | negative regulator of ubiquitin-like proteins 1                                  | 7.20E-04 | NM_016736                                                                     |
| 1436 | Moxd1     | monooxygenase, DBH-like 1                                                        | 7.21E-04 | NM_021509                                                                     |
| 1437 | Akr1b3    | aldo-keto reductase family 1, member B3 (aldose reductase)                       | 7.22E-04 | NM_009658                                                                     |
| 1438 | Irs2      | insulin receptor substrate 2                                                     | 7.22E-04 | NM_001081212                                                                  |
| 1439 | Gtf3c6    | general transcription factor IIIC, polypeptide 6, alpha                          | 7.24E-04 | NM_026113                                                                     |
| 1440 | Hist1h2bc | histone cluster 1, H2bc                                                          | 7.25E-04 | NM_023422                                                                     |
| 1441 | Anxa3     | annexin A3                                                                       | 7.30E-04 | NM_013470                                                                     |
| 1442 | Cep250    | centrosomal protein 250                                                          | 7.31E-04 | NM_001129999 /// NM_001130000 /// NM_008383 /// NM_177217                     |
| 1443 | Hnmt      | histamine N-methyltransferase                                                    | 7.33E-04 | NM_080462                                                                     |
| 1444 | Pex19     | peroxisomal biogenesis factor 19                                                 | 7.34E-04 | NM_001159525 /// NM_023041                                                    |
| 1445 | Aldh4a1   | aldehyde dehydrogenase 4 family, member A1                                       | 7.36E-04 | NM_175438                                                                     |
| 1446 | Nvl       | nuclear VCP-like                                                                 | 7.36E-04 | NM_026171                                                                     |
| 1447 | Marcks    | myristoylated alanine rich protein kinase C substrate                            | 7.36E-04 | NM_008538                                                                     |
| 1448 | Pigh      | phosphatidylinositol glycan anchor biosynthesis, class H                         | 7.44E-04 | NM_029988                                                                     |
| 1449 | A2bp1     | ataxin 2 binding protein 1                                                       | 7.45E-04 | NM_021477 /// NM_183188                                                       |
| 1450 | Ogfr1     | opioid growth factor receptor-like 1                                             | 7.45E-04 | NM_001081079                                                                  |
| 1451 | Hbxlp     | hepatitis B virus x interacting protein                                          | 7.46E-04 | NM_026774 /// XM_001478151 /// XM_001478161 /// XM_001480844 /// XM_001480845 |
| 1452 | BC017612  | cDNA sequence BC017612                                                           | 7.48E-04 | NM_133214                                                                     |
| 1453 | Ctnna1    | catenin (cadherin associated protein), alpha 1                                   | 7.49E-04 | NM_009818                                                                     |
| 1454 | Tmem56    | transmembrane protein 56                                                         | 7.53E-04 | NM_178936                                                                     |
| 1455 | Atp5d     | ATP synthase, H+ transporting, mitochondrial F1 complex, delta subunit           | 7.54E-04 | NM_025313                                                                     |
| 1456 | Ptgis     | prostaglandin I2 (prostacyclin) synthase                                         | 7.56E-04 | NM_008968                                                                     |
| 1457 | Dlst      | dihydrolipoamide S-succinyltransferase (E2 component of 2-oxo-glutarate complex) | 7.60E-04 | NM_030225                                                                     |
| 1458 | Marcks1   | MARCKS-like 1                                                                    | 7.62E-04 | NM_010807                                                                     |
| 1459 | S100a9    | S100 calcium binding protein A9 (calgranulin B)                                  | 7.64E-04 | NM_009114                                                                     |
| 1460 | Pigt      | phosphatidylinositol glycan anchor biosynthesis, class T                         | 7.64E-04 | NM_133779                                                                     |
| 1461 | Pcolce    | procollagen C-endopeptidase enhancer protein                                     | 7.66E-04 | NM_008788                                                                     |
| 1462 | Sumf1     | sulfatase modifying factor 1                                                     | 7.69E-04 | NM_145937                                                                     |
| 1463 | Mmp9      | matrix metalloproteinase 9                                                       | 7.70E-04 | NM_013599                                                                     |
| 1464 | Glul      | glutamate-ammonia ligase (glutamine synthetase)                                  | 7.74E-04 | NM_008131                                                                     |
| 1465 | Luzp1     | leucine zipper protein 1                                                         | 7.75E-04 | NM_024452                                                                     |
| 1466 | Agrn      | agrin                                                                            | 7.76E-04 | NM_021604                                                                     |
| 1467 | Ilf3      | interleukin enhancer binding factor 3                                            | 7.76E-04 | NM_001042707 /// NM_001042708 /// NM_001042709 /// NM_010561                  |
| 1468 | Serpini1  | serine (or cysteine) peptidase inhibitor, clade I, member 1                      | 7.77E-04 | NM_009250                                                                     |
| 1469 | Klf2      | Kruppel-like factor 2 (lung)                                                     | 7.82E-04 | NM_008452                                                                     |



|      |                        |                                                                                  |          |                                                        |
|------|------------------------|----------------------------------------------------------------------------------|----------|--------------------------------------------------------|
| 1470 | Tmem106c               | transmembrane protein 106C                                                       | 7.84E-04 | NM_201359                                              |
| 1471 | Gm98                   | predicted gene 98                                                                | 7.84E-04 | NM_001033481 /// XM_359374 /// XM_888586 /// XM_981099 |
| 1472 | Zkscan14               | zinc finger with KRAB and SCAN domains 14                                        | 7.86E-04 | NM_023322                                              |
| 1473 | Iffo2                  | intermediate filament family orphan 2                                            | 7.87E-04 | NM_183148                                              |
| 1474 | Trim30                 | tripartite motif-containing 30                                                   | 7.88E-04 | NM_009099                                              |
| 1475 | Pign                   | phosphatidylinositol glycan anchor biosynthesis, class N                         | 7.92E-04 | NM_013784                                              |
| 1476 | Psmg3                  | proteasome (prosome, macropain) assembly chaperone 3                             | 7.94E-04 | NM_025604                                              |
| 1477 | Entpd7                 | ectonucleoside triphosphate diphosphohydrolase 7                                 | 7.98E-04 | NM_053103                                              |
| 1478 | Fam111a                | family with sequence similarity 111, member A                                    | 7.98E-04 | NM_026640                                              |
| 1479 | Ctss                   | cathepsin S                                                                      | 7.99E-04 | NM_021281                                              |
| 1480 | Coro2b                 | coronin, actin binding protein, 2B                                               | 8.02E-04 | NM_175484                                              |
| 1481 | Rnf123                 | ring finger protein 123                                                          | 8.02E-04 | NM_032543                                              |
| 1482 | Bmpr1a                 | bone morphogenetic protein receptor, type 1A                                     | 8.03E-04 | NM_009758                                              |
| 1483 | Asxl1                  | additional sex combs like 1 (Drosophila)                                         | 8.05E-04 | NM_001039939                                           |
| 1484 | Pipox                  | pipecolic acid oxidase                                                           | 8.10E-04 | NM_008952                                              |
| 1485 | Neat1                  | nuclear paraspeckle assembly transcript 1 (non-protein coding)                   | 8.12E-04 | NR_003513 /// XR_035481 /// XR_035482                  |
| 1486 | H2afx                  | H2A histone family, member X                                                     | 8.12E-04 | NM_010436                                              |
| 1487 | Akr1b3                 | aldo-keto reductase family 1, member B3 (aldose reductase)                       | 8.15E-04 | NM_009658                                              |
| 1488 | Rtp4                   | receptor transporter protein 4                                                   | 8.20E-04 | NM_023386                                              |
| 1489 | Gm10333 /// Nutf2      | predicted gene 10333 /// nuclear transport factor 2                              | 8.20E-04 | NM_026532 /// XM_001480585                             |
| 1490 | Scd2                   | stearoyl-Coenzyme A desaturase 2                                                 | 8.21E-04 | NM_009128                                              |
| 1491 | Cdh2                   | cadherin 2                                                                       | 8.23E-04 | NM_007664                                              |
| 1492 | Krba1                  | KRAB-A domain containing 1                                                       | 8.26E-04 | NM_133922                                              |
| 1493 | Tmem9                  | transmembrane protein 9                                                          | 8.31E-04 | NM_001160145 /// NM_001160146 /// NM_025439            |
| 1494 | Igfbp7                 | insulin-like growth factor binding protein 7                                     | 8.32E-04 | NM_001159518 /// NM_008048                             |
| 1495 | Inhbb /// LOC100046802 | inhibin beta-B /// similar to Inhbb protein                                      | 8.34E-04 | NM_008381 /// XM_001476835                             |
| 1496 | Nit2                   | nitrilase family, member 2                                                       | 8.36E-04 | NM_023175                                              |
| 1497 | Agfg1                  | ArfGAP with FG repeats 1                                                         | 8.38E-04 | NM_010472                                              |
| 1498 | Dst                    | dystonin                                                                         | 8.38E-04 | NM_133833 /// NM_134448                                |
| 1499 | Lyve1                  | lymphatic vessel endothelial hyaluronan receptor 1                               | 8.42E-04 | NM_053247                                              |
| 1500 | Zfp30                  | zinc finger protein 30                                                           | 8.44E-04 | NM_013705                                              |
| 1501 | Vdac1                  | voltage-dependent anion channel 1                                                | 8.46E-04 | NM_011694                                              |
| 1502 | Slc38a1                | solute carrier family 38, member 1                                               | 8.47E-04 | NM_134086                                              |
| 1503 | Fmod                   | fibromodulin                                                                     | 8.48E-04 | NM_021355                                              |
| 1504 | Lgtn                   | ligatin                                                                          | 8.52E-04 | NM_001136070 /// NM_010709                             |
| 1505 | Copg2as2               | coatamer protein complex, subunit gamma 2, antisense 2                           | 8.54E-04 | NR_002845 /// XM_001471930                             |
| 1506 | Traf6                  | TNF receptor-associated factor 6                                                 | 8.55E-04 | NM_009424 /// XM_001479093 /// XM_001479837            |
| 1507 | Plbd2                  | phospholipase B domain containing 2                                              | 8.57E-04 | NM_023625                                              |
| 1508 | Foxp1                  | forkhead box P1                                                                  | 8.61E-04 | NM_053202                                              |
| 1509 | Slc44a2                | solute carrier family 44, member 2                                               | 8.63E-04 | NM_152808                                              |
| 1510 | Ly86                   | lymphocyte antigen 86                                                            | 8.64E-04 | NM_010745                                              |
| 1511 | Adamts10               | a disintegrin-like and metallopeptidase (reprolysin type) with thrombospondin ty | 8.65E-04 | NM_172619                                              |
| 1512 | Ywhaq                  | tyrosine 3-monooxygenase/tryptophan 5-monooxygenase activation protein, theta p  | 8.66E-04 | NM_011739                                              |
| 1513 | Rbm8a                  | RNA binding motif protein 8a                                                     | 8.69E-04 | NM_001102407 /// NM_025875                             |
| 1514 | Cotl1                  | coactosin-like 1 (Dictyostelium)                                                 | 8.71E-04 | NM_028071                                              |
| 1515 | Bpnt1                  | bisphosphate 3'-nucleotidase 1                                                   | 8.77E-04 | NM_011794                                              |

|      |                              |                                                                                    |          |                                                                      |
|------|------------------------------|------------------------------------------------------------------------------------|----------|----------------------------------------------------------------------|
| 1516 | Nfix                         | nuclear factor I/X                                                                 | 8.77E-04 | NM_001081981 /// NM_001081982 /// NM_010906                          |
| 1517 | Cct2                         | chaperonin containing Tcp1, subunit 2 (beta)                                       | 8.78E-04 | NM_007636                                                            |
| 1518 | Fyb                          | FYN binding protein                                                                | 8.81E-04 | NM_011815                                                            |
| 1519 | Prmt7                        | protein arginine N-methyltransferase 7                                             | 8.83E-04 | NM_145404                                                            |
| 1520 | Gm12501 /// LOC676549 /// S  | SIVA1, apoptosis-inducing factor pseudogene /// similar to CD27-binding (Siva) p   | 8.84E-04 | NM_001161737 /// NM_013929 /// XR_032348 /// XR_033889 /// XR_034306 |
| 1521 | Pebp1                        | phosphatidylethanolamine binding protein 1                                         | 8.86E-04 | NM_018858                                                            |
| 1522 | ---                          | ---                                                                                | 8.86E-04 | ---                                                                  |
| 1523 | Zc3h11a                      | zinc finger CCCH type containing 11A                                               | 8.87E-04 | NM_144530                                                            |
| 1524 | AF251705                     | cDNA sequence AF251705                                                             | 8.88E-04 | NM_134158                                                            |
| 1525 | Xbp1                         | X-box binding protein 1                                                            | 8.88E-04 | NM_013842                                                            |
| 1526 | Plat                         | plasminogen activator, tissue                                                      | 8.89E-04 | NM_008872                                                            |
| 1527 | Zfp451                       | zinc finger protein 451                                                            | 8.91E-04 | NM_133817                                                            |
| 1528 | Abca8a                       | ATP-binding cassette, sub-family A (ABC1), member 8a                               | 8.95E-04 | NM_153145                                                            |
| 1529 | Gm11847 /// Gm6793 /// Hnrnp | predicted gene 11847 /// heterogeneous nuclear ribonucleoprotein A3 pseudogene /   | 8.99E-04 | NM_053263 /// NM_146130 /// NM_198090 /// XM_895041 /// XM_897632 // |
| 1530 | Ifi2712a                     | interferon, alpha-inducible protein 27 like 2A                                     | 9.00E-04 | NM_029803                                                            |
| 1531 | Oxct1                        | 3-oxoacid CoA transferase 1                                                        | 9.01E-04 | NM_024188                                                            |
| 1532 | H2-Eb1                       | histocompatibility 2, class II antigen E beta                                      | 9.03E-04 | NM_010382                                                            |
| 1533 | Pttg1ip                      | pituitary tumor-transforming 1 interacting protein                                 | 9.04E-04 | NM_145925                                                            |
| 1534 | Tes                          | testis derived transcript                                                          | 9.16E-04 | NM_011570 /// NM_207176                                              |
| 1535 | Dnmt3b                       | DNA methyltransferase 3B                                                           | 9.16E-04 | NM_001003960 /// NM_001003961 /// NM_001003963 /// NM_001122997 ///  |
| 1536 | Ercc8                        | excision repair/ross-complementing rodent repair deficiency, complementation group | 9.17E-04 | NM_028042                                                            |
| 1537 | Fn1                          | fibronectin 1                                                                      | 9.20E-04 | NM_010233                                                            |
| 1538 | Lamp2                        | lysosomal-associated membrane protein 2                                            | 9.21E-04 | NM_001017959 /// NM_010685                                           |
| 1539 | LOC100047285 /// Prss29      | similar to implantation serine proteinase 2 /// protease, serine, 29               | 9.21E-04 | NM_053260 /// XM_001477507                                           |
| 1540 | Vasn                         | vasorin                                                                            | 9.21E-04 | NM_139307                                                            |
| 1541 | Stx17                        | syntaxin 17                                                                        | 9.25E-04 | NM_026343                                                            |
| 1542 | Zc3h11a                      | zinc finger CCCH type containing 11A                                               | 9.25E-04 | NM_144530                                                            |
| 1543 | 1190002N15Rik /// LOC10004   | RIKEN cDNA 1190002N15 gene /// hypothetical protein LOC100044725                   | 9.31E-04 | NM_001033145 /// XM_001472923                                        |
| 1544 | Mettl7a1                     | methyltransferase like 7A1                                                         | 9.31E-04 | NM_027334                                                            |
| 1545 | Usp25                        | ubiquitin specific peptidase 25                                                    | 9.32E-04 | NM_013918                                                            |
| 1546 | Egfr                         | epidermal growth factor receptor                                                   | 9.33E-04 | NM_007912 /// NM_207655                                              |
| 1547 | C1r                          | complement component 1, r subcomponent                                             | 9.42E-04 | NM_023143                                                            |
| 1548 | Hnrnpu                       | heterogeneous nuclear ribonucleoprotein U                                          | 9.42E-04 | NM_016805                                                            |
| 1549 | Zfp704                       | zinc finger protein 704                                                            | 9.44E-04 | NM_133218                                                            |
| 1550 | Mrpl44                       | mitochondrial ribosomal protein L44                                                | 9.44E-04 | NM_001081210                                                         |
| 1551 | Ak1                          | adenylate kinase 1                                                                 | 9.45E-04 | NM_021515                                                            |
| 1552 | Ccnh                         | cyclin H                                                                           | 9.46E-04 | NM_023243                                                            |
| 1553 | Wdtd1                        | WD and tetratricopeptide repeats 1                                                 | 9.46E-04 | NM_199306                                                            |
| 1554 | Copa                         | coatamer protein complex subunit alpha                                             | 9.47E-04 | NM_009938                                                            |
| 1555 | Zdhhc3                       | zinc finger, DHHC domain containing 3                                              | 9.47E-04 | NM_026917                                                            |
| 1556 | Prdm5                        | PR domain containing 5                                                             | 9.48E-04 | NM_027547                                                            |
| 1557 | BC003331                     | cDNA sequence BC003331                                                             | 9.51E-04 | NM_001077237 /// NM_145511                                           |
| 1558 | Ssbp3                        | single-stranded DNA binding protein 3                                              | 9.52E-04 | NM_023672 /// NM_198438                                              |
| 1559 | C1galt1                      | core 1 synthase, glycoprotein-N-acetylgalactosamine 3-beta-galactosyltransferase   | 9.56E-04 | NM_052993                                                            |
| 1560 | Atp10a                       | ATPase, class V, type 10A                                                          | 9.58E-04 | NM_009728                                                            |
| 1561 | 9430016H08Rik                | RIKEN cDNA 9430016H08 gene                                                         | 9.58E-04 | NM_001081181 /// XM_001478981 /// XM_907464                          |

|      |                             |                                                                                   |          |                                                                      |
|------|-----------------------------|-----------------------------------------------------------------------------------|----------|----------------------------------------------------------------------|
| 1562 | Dgcr2                       | DiGeorge syndrome critical region gene 2                                          | 9.60E-04 | NM_001109750 /// NM_010048                                           |
| 1563 | Cd44                        | CD44 antigen                                                                      | 9.62E-04 | NM_001039150 /// NM_001039151 /// NM_009851                          |
| 1564 | Rnf160                      | ring finger protein 160                                                           | 9.62E-04 | NM_001081068                                                         |
| 1565 | Kcnab3                      | potassium voltage-gated channel, shaker-related subfamily, beta member 3          | 9.63E-04 | NM_010599                                                            |
| 1566 | Nxn                         | nucleoredoxin                                                                     | 9.66E-04 | NM_008750                                                            |
| 1567 | Runx1                       | runt related transcription factor 1                                               | 9.70E-04 | NM_001111021 /// NM_001111022 /// NM_001111023 /// NM_009821         |
| 1568 | Inpp5k                      | inositol polyphosphate 5-phosphatase K                                            | 9.73E-04 | NM_008916                                                            |
| 1569 | Mgll                        | monoglyceride lipase                                                              | 9.75E-04 | NM_011844                                                            |
| 1570 | Mll1                        | myeloid/lymphoid or mixed-lineage leukemia 1                                      | 9.76E-04 | NM_001081049                                                         |
| 1571 | Fhdc1                       | FH2 domain containing 1                                                           | 9.79E-04 | NM_001033301                                                         |
| 1572 | Ric8                        | resistance to inhibitors of cholinesterase 8 homolog (C. elegans)                 | 9.81E-04 | NM_053194                                                            |
| 1573 | Galnt4                      | UDP-N-acetyl-alpha-D-galactosamine: polypeptide N-acetylgalactosaminyltransferase | 9.82E-04 | NM_015737                                                            |
| 1574 | Aspm                        | asp (abnormal spindle)-like, microcephaly associated (Drosophila)                 | 9.85E-04 | NM_009791                                                            |
| 1575 | Actg1                       | actin, gamma, cytoplasmic 1                                                       | 9.85E-04 | NM_009609                                                            |
| 1576 | Twsg1                       | twisted gastrulation homolog 1 (Drosophila)                                       | 9.87E-04 | NM_023053                                                            |
| 1577 | Ywhae                       | tyrosine 3-monooxygenase/tryptophan 5-monooxygenase activation protein, epsilon   | 9.87E-04 | NM_009536                                                            |
| 1578 | Gng12                       | guanine nucleotide binding protein (G protein), gamma 12                          | 9.87E-04 | NM_025278                                                            |
| 1579 | Glo1                        | glyoxalase 1                                                                      | 9.88E-04 | NM_001113560 /// NM_025374                                           |
| 1580 | Dgcr8                       | DiGeorge syndrome critical region gene 8                                          | 9.91E-04 | NM_033324                                                            |
| 1581 | Slc2a8                      | solute carrier family 2, (facilitated glucose transporter), member 8              | 9.93E-04 | NM_019488                                                            |
| 1582 | Gosr1                       | golgi SNAP receptor complex member 1                                              | 9.93E-04 | NM_016810                                                            |
| 1583 | Eid1                        | EP300 interacting inhibitor of differentiation 1                                  | 9.96E-04 | NM_025613                                                            |
| 1584 | Ficd                        | FIC domain containing                                                             | 9.96E-04 | NM_001010825                                                         |
| 1585 | Ltbp3                       | latent transforming growth factor beta binding protein 3                          | 9.99E-04 | NM_008520                                                            |
| 1586 | Rras                        | Harvey rat sarcoma oncogene, subgroup R                                           | 1.00E-03 | NM_009101                                                            |
| 1587 | Fads3                       | fatty acid desaturase 3                                                           | 1.00E-03 | NM_021890                                                            |
| 1588 | Atp5j                       | ATP synthase, H+ transporting, mitochondrial F0 complex, subunit F                | 1.00E-03 | NM_016755                                                            |
| 1589 | Calr                        | calreticulin                                                                      | 1.00E-03 | NM_007591                                                            |
| 1590 | Pdgfrb                      | platelet derived growth factor receptor, beta polypeptide                         | 1.01E-03 | NM_001146268 /// NM_008809                                           |
| 1591 | Cnn2                        | calponin 2                                                                        | 1.01E-03 | NM_007725                                                            |
| 1592 | Adpgk                       | ADP-dependent glucokinase                                                         | 1.01E-03 | NM_028121                                                            |
| 1593 | Pl4k2a                      | phosphatidylinositol 4-kinase type 2 alpha                                        | 1.01E-03 | NM_145501                                                            |
| 1594 | Zfp451                      | zinc finger protein 451                                                           | 1.01E-03 | NM_133817                                                            |
| 1595 | Tmub2                       | transmembrane and ubiquitin-like domain containing 2                              | 1.01E-03 | NM_028076                                                            |
| 1596 | Abcg5                       | ATP-binding cassette, sub-family G (WHITE), member 5                              | 1.02E-03 | NM_031884                                                            |
| 1597 | Zfp105                      | zinc finger protein 105                                                           | 1.02E-03 | NM_009544                                                            |
| 1598 | Skil                        | SKI-like                                                                          | 1.02E-03 | NM_001039090 /// NM_011386                                           |
| 1599 | Zfand2b                     | zinc finger, AN1 type domain 2B                                                   | 1.03E-03 | NM_001159905 /// NM_001159906 /// NM_026846                          |
| 1600 | 4930579J09Rik               | RIKEN cDNA 4930579J09 gene                                                        | 1.03E-03 | NM_133689                                                            |
| 1601 | Thyn1                       | thymocyte nuclear protein 1                                                       | 1.03E-03 | NM_144543                                                            |
| 1602 | Cugbp2                      | CUG triplet repeat, RNA binding protein 2                                         | 1.03E-03 | NM_001110228 /// NM_001110229 /// NM_001110230 /// NM_001110231 ///  |
| 1603 | Orc6l                       | origin recognition complex, subunit 6-like (S. cerevisiae)                        | 1.03E-03 | NM_001163791 /// NM_019716 /// NR_028268                             |
| 1604 | Gm11263 /// Gm13654 /// LOC | predicted gene 11263 /// predicted gene 13654 /// similar to ribosomal protein S  | 1.03E-03 | NM_009096 /// XM_001003926 /// XM_001480836 /// XM_001480838 /// XM_ |
| 1605 | Arpc1b                      | actin related protein 2/3 complex, subunit 1B                                     | 1.04E-03 | NM_023142                                                            |
| 1606 | Sdc2                        | syndecan 2                                                                        | 1.04E-03 | NM_008304                                                            |
| 1607 | Ap3s2                       | adaptor-related protein complex 3, sigma 2 subunit                                | 1.04E-03 | NM_009682                                                            |

|      |                        |                                                                                  |          |                                                                      |
|------|------------------------|----------------------------------------------------------------------------------|----------|----------------------------------------------------------------------|
| 1608 | BC006779               | cDNA sequence BC006779                                                           | 1.04E-03 | NM_183162                                                            |
| 1609 | Rhbdd1                 | rhombooid domain containing 1                                                    | 1.04E-03 | NM_001122685 /// NM_029777                                           |
| 1610 | Hspa14                 | heat shock protein 14                                                            | 1.04E-03 | NM_015765                                                            |
| 1611 | Bcl2l15                | BCL2l-like 15                                                                    | 1.04E-03 | NM_001142959 /// NM_001142960 /// XR_002337 /// XR_005162 /// XR_035 |
| 1612 | Cetn2                  | centrin 2                                                                        | 1.05E-03 | NM_019405                                                            |
| 1613 | Pad14                  | peptidyl arginine deiminase, type IV                                             | 1.05E-03 | NM_011061                                                            |
| 1614 | Slc44a1                | solute carrier family 44, member 1                                               | 1.05E-03 | NM_001159633 /// NM_133891                                           |
| 1615 | Srpr                   | signal recognition particle receptor ('docking protein')                         | 1.05E-03 | NM_026130                                                            |
| 1616 | Tgfb2                  | transforming growth factor, beta receptor II                                     | 1.05E-03 | NM_009371 /// NM_029575                                              |
| 1617 | Nfe2l2                 | nuclear factor, erythroid derived 2, like 2                                      | 1.05E-03 | NM_010902                                                            |
| 1618 | Dtnbp1                 | dystrobrevin binding protein 1                                                   | 1.05E-03 | NM_025772                                                            |
| 1619 | Myadm                  | myeloid-associated differentiation marker                                        | 1.05E-03 | NM_001093764 /// NM_001093765 /// NM_001093766 /// NM_016969         |
| 1620 | Pnpla2                 | patatin-like phospholipase domain containing 2                                   | 1.06E-03 | NM_001163689 /// NM_025802 /// NR_028142                             |
| 1621 | Iqgap1                 | IQ motif containing GTPase activating protein 1                                  | 1.06E-03 | NM_016721                                                            |
| 1622 | Siae                   | sialic acid acetyltransferase                                                    | 1.06E-03 | NM_011734                                                            |
| 1623 | Ldha                   | lactate dehydrogenase A                                                          | 1.06E-03 | NM_001136069 /// NM_010699                                           |
| 1624 | Cyp2e1                 | cytochrome P450, family 2, subfamily e, polypeptide 1                            | 1.06E-03 | NM_021282                                                            |
| 1625 | Itpr3                  | inositol 1,4,5-triphosphate receptor 3                                           | 1.06E-03 | NM_080553                                                            |
| 1626 | Cd151                  | CD151 antigen                                                                    | 1.06E-03 | NM_001111049 /// NM_001111050 /// NM_009842                          |
| 1627 | Wasl                   | Wiskott-Aldrich syndrome-like (human)                                            | 1.06E-03 | NM_028459                                                            |
| 1628 | Ifngr1                 | interferon gamma receptor 1                                                      | 1.07E-03 | NM_010511                                                            |
| 1629 | Ywhab                  | tyrosine 3-monooxygenase/tryptophan 5-monooxygenase activation protein, beta pe  | 1.07E-03 | NM_018753                                                            |
| 1630 | Ripk4                  | receptor-interacting serine-threonine kinase 4                                   | 1.07E-03 | NM_023663                                                            |
| 1631 | Cpe /// LOC100046434   | carboxypeptidase E /// similar to carboxypeptidase E                             | 1.09E-03 | NM_013494 /// XM_001476197                                           |
| 1632 | Ankrd6                 | ankyrin repeat domain 6                                                          | 1.09E-03 | NM_001012450 /// NM_001012451 /// NM_080471                          |
| 1633 | Ipo8                   | importin 8                                                                       | 1.09E-03 | NM_001081113                                                         |
| 1634 | Nek2                   | NIMA (never in mitosis gene a)-related expressed kinase 2                        | 1.09E-03 | NM_010892                                                            |
| 1635 | Irak4                  | interleukin-1 receptor-associated kinase 4                                       | 1.10E-03 | NM_029926                                                            |
| 1636 | Ccng1                  | cyclin G1                                                                        | 1.10E-03 | NM_009831                                                            |
| 1637 | Tmem186                | transmembrane protein 186                                                        | 1.10E-03 | NM_025708                                                            |
| 1638 | Z610101N10Rik          | RIKEN cDNA Z610101N10 gene                                                       | 1.10E-03 | NM_001114977 /// NM_026476                                           |
| 1639 | Kif13a                 | kinesin family member 13A                                                        | 1.10E-03 | NM_010617                                                            |
| 1640 | Mapk8                  | mitogen-activated protein kinase 8                                               | 1.10E-03 | NM_016700                                                            |
| 1641 | Vim                    | vimentin                                                                         | 1.10E-03 | NM_011701                                                            |
| 1642 | Laptm4a                | lysosomal-associated protein transmembrane 4A                                    | 1.11E-03 | NM_008640                                                            |
| 1643 | Csf1                   | colony stimulating factor 1 (macrophage)                                         | 1.11E-03 | NM_001113529 /// NM_001113530 /// NM_007778                          |
| 1644 | Rabgap1l               | RAB GTPase activating protein 1-like                                             | 1.12E-03 | NM_001038621 /// NM_013862                                           |
| 1645 | Ccl3                   | chemokine (C-C motif) ligand 3                                                   | 1.13E-03 | NM_011337                                                            |
| 1646 | Grina                  | glutamate receptor, ionotropic, N-methyl D-aspartate-associated protein 1 (gluta | 1.13E-03 | NM_023168                                                            |
| 1647 | Atp6v1g1 /// LOC638149 | ATPase, H+ transporting, lysosomal V1 subunit G1 /// similar to ATPase, H+ trans | 1.13E-03 | NM_024173 /// XR_033821                                              |
| 1648 | Slc15a4                | solute carrier family 15, member 4                                               | 1.13E-03 | NM_133895                                                            |
| 1649 | Tuba1a                 | tubulin, alpha 1A                                                                | 1.13E-03 | NM_011653                                                            |
| 1650 | Scd2                   | stearoyl-Coenzyme A desaturase 2                                                 | 1.14E-03 | NM_009128                                                            |
| 1651 | Sorbs1                 | sorbin and SH3 domain containing 1                                               | 1.14E-03 | NM_001034962 /// NM_001034963 /// NM_001034964 /// NM_009166 /// NM  |
| 1652 | Wwp1                   | WW domain containing E3 ubiquitin protein ligase 1                               | 1.14E-03 | NM_177327                                                            |
| 1653 | Ptges                  | prostaglandin E synthase                                                         | 1.14E-03 | NM_022415                                                            |

|      |                        |                                                                                   |          |                                                                     |
|------|------------------------|-----------------------------------------------------------------------------------|----------|---------------------------------------------------------------------|
| 1654 | Clstn1                 | calsyntenin 1                                                                     | 1.14E-03 | NM_023051                                                           |
| 1655 | Ctdspl                 | CTD (carboxy-terminal domain, RNA polymerase II, polypeptide A) small phosphatase | 1.15E-03 | NM_133710                                                           |
| 1656 | Ero1lb                 | ERO1-like beta ( <i>S. cerevisiae</i> )                                           | 1.15E-03 | NM_026184                                                           |
| 1657 | Bcar1                  | breast cancer anti-estrogen resistance 1                                          | 1.15E-03 | NM_009954                                                           |
| 1658 | Hmgb2                  | high mobility group box 2                                                         | 1.15E-03 | NM_008252                                                           |
| 1659 | Igk                    | immunoglobulin kappa chain complex                                                | 1.15E-03 | ---                                                                 |
| 1660 | Txnip                  | thioredoxin interacting protein                                                   | 1.15E-03 | NM_001009935 /// NM_023719                                          |
| 1661 | Ublcp1                 | ubiquitin-like domain containing CTD phosphatase 1                                | 1.15E-03 | NM_024475                                                           |
| 1662 | Tfrc                   | transferrin receptor                                                              | 1.16E-03 | NM_011638                                                           |
| 1663 | Fth1                   | ferritin heavy chain 1                                                            | 1.16E-03 | NM_010239                                                           |
| 1664 | Wdr81                  | WD repeat domain 81                                                               | 1.16E-03 | NM_138950 /// XM_001002633 /// XM_911699                            |
| 1665 | Parva                  | parvin, alpha                                                                     | 1.16E-03 | NM_020606                                                           |
| 1666 | Tulp4                  | Tubby like protein 4                                                              | 1.17E-03 | NM_001033529 /// NM_001103181 /// NM_054040                         |
| 1667 | Btg3 /// Gm7334        | B-cell translocation gene 3 /// B-cell translocation gene 3 pseudogene            | 1.17E-03 | NM_009770 /// NR_002700                                             |
| 1668 | Fgf7                   | fibroblast growth factor 7                                                        | 1.17E-03 | NM_008008                                                           |
| 1669 | Jak1                   | Janus kinase 1                                                                    | 1.18E-03 | NM_146145                                                           |
| 1670 | Sfrp2                  | secreted frizzled-related protein 2                                               | 1.18E-03 | NM_009144                                                           |
| 1671 | Pdk4                   | pyruvate dehydrogenase kinase, isoenzyme 4                                        | 1.18E-03 | NM_013743                                                           |
| 1672 | Jam2                   | junction adhesion molecule 2                                                      | 1.18E-03 | NM_023844                                                           |
| 1673 | Arpp21                 | cyclic AMP-regulated phosphoprotein, 21                                           | 1.18E-03 | NM_028755 /// NM_033264                                             |
| 1674 | Dnaja4                 | DnaJ (Hsp40) homolog, subfamily A, member 4                                       | 1.18E-03 | NM_021422                                                           |
| 1675 | Fcrls                  | Fc receptor-like 5, scavenger receptor                                            | 1.18E-03 | NM_030707                                                           |
| 1676 | Gja1                   | gap junction protein, alpha 1                                                     | 1.19E-03 | NM_010288                                                           |
| 1677 | ApoE                   | apolipoprotein E                                                                  | 1.19E-03 | NM_009696                                                           |
| 1678 | LOC100047839 /// Tomm6 | hypothetical protein LOC100047839 /// translocase of outer mitochondrial membrane | 1.20E-03 | NM_025365 /// XM_001479252                                          |
| 1679 | Macf1                  | microtubule-actin crosslinking factor 1                                           | 1.20E-03 | NM_009600 /// XM_001472676 /// XM_001472697 /// XM_001472723 /// XM |
| 1680 | ---                    | ---                                                                               | 1.20E-03 | ---                                                                 |
| 1681 | 1110003E01Rik          | RIKEN cDNA 1110003E01 gene                                                        | 1.20E-03 | NM_133697                                                           |
| 1682 | BC021614               | cDNA sequence BC021614                                                            | 1.20E-03 | NM_144869                                                           |
| 1683 | Nub1                   | negative regulator of ubiquitin-like proteins 1                                   | 1.21E-03 | NM_016736                                                           |
| 1684 | Lasp1                  | LIM and SH3 protein 1                                                             | 1.21E-03 | NM_010688                                                           |
| 1685 | Dkk3                   | dickkopf homolog 3 ( <i>Xenopus laevis</i> )                                      | 1.21E-03 | NM_015814                                                           |
| 1686 | Enah                   | enabled homolog ( <i>Drosophila</i> )                                             | 1.22E-03 | NM_001083120 /// NM_001083121 /// NM_008680 /// NM_010135           |
| 1687 | Slc37a2                | solute carrier family 37 (glycerol-3-phosphate transporter), member 2             | 1.22E-03 | NM_001145960 /// NM_020258                                          |
| 1688 | Tsc22d1                | TSC22 domain family, member 1                                                     | 1.22E-03 | NM_009366 /// NM_207652                                             |
| 1689 | Myo1d                  | myosin ID                                                                         | 1.22E-03 | NM_177390                                                           |
| 1690 | Hist1h2bp              | histone cluster 1, H2bp                                                           | 1.23E-03 | NM_178202                                                           |
| 1691 | Psmc6                  | proteasome (prosome, macropain) 26S subunit, ATPase, 6                            | 1.23E-03 | NM_025959                                                           |
| 1692 | Aak1                   | AP2 associated kinase 1                                                           | 1.23E-03 | NM_001040106 /// NM_177762                                          |
| 1693 | Rai1                   | retinoic acid induced 1                                                           | 1.24E-03 | NM_001037764 /// NM_009021                                          |
| 1694 | Msr1                   | macrophage scavenger receptor 1                                                   | 1.24E-03 | NM_001113326 /// NM_031195                                          |
| 1695 | Tjp2                   | tight junction protein 2                                                          | 1.24E-03 | NM_011597                                                           |
| 1696 | C230094A16Rik          | RIKEN cDNA C230094A16 gene                                                        | 1.25E-03 | NM_146016                                                           |
| 1697 | Mapk3                  | mitogen-activated protein kinase 3                                                | 1.25E-03 | NM_011952                                                           |
| 1698 | Ddx26b                 | DEAD/H (Asp-Glu-Ala-Asp/His) box polypeptide 26B                                  | 1.26E-03 | NM_172779                                                           |
| 1699 | Ptpn12                 | protein tyrosine phosphatase, non-receptor type 12                                | 1.26E-03 | NM_011203                                                           |

|      |                                       |                                                                                 |          |                                                                             |
|------|---------------------------------------|---------------------------------------------------------------------------------|----------|-----------------------------------------------------------------------------|
| 1700 | Pkig                                  | protein kinase inhibitor, gamma                                                 | 1.26E-03 | NM_001039390 /// NM_001039391 /// NM_001164053 /// NM_001164055 ///         |
| 1701 | AI316807                              | expressed sequence AI316807                                                     | 1.27E-03 | NM_001012667 /// NM_001146117                                               |
| 1702 | Zdhhc14                               | zinc finger, DHHC domain containing 14                                          | 1.28E-03 | NM_146073                                                                   |
| 1703 | Tmpo                                  | thymopoietin                                                                    | 1.28E-03 | NM_001080129 /// NM_001080130 /// NM_001080131 /// NM_001080132 ///         |
| 1704 | Ube2t                                 | ubiquitin-conjugating enzyme E2T (putative)                                     | 1.28E-03 | NM_026024                                                                   |
| 1705 | Ptpn13                                | protein tyrosine phosphatase, non-receptor type 13                              | 1.28E-03 | NM_011204                                                                   |
| 1706 | D2hgdh                                | D-2-hydroxyglutarate dehydrogenase                                              | 1.28E-03 | NM_178882                                                                   |
| 1707 | Tfpi                                  | tissue factor pathway inhibitor                                                 | 1.28E-03 | NM_011576                                                                   |
| 1708 | Slc39a1                               | solute carrier family 39 (zinc transporter), member 1                           | 1.29E-03 | NM_013901                                                                   |
| 1709 | Tcta                                  | T-cell leukemia translocation altered gene                                      | 1.29E-03 | NM_133986                                                                   |
| 1710 | Fam63a                                | family with sequence similarity 63, member A                                    | 1.29E-03 | NM_133858                                                                   |
| 1711 | Kpnb1                                 | karyopherin (importin) beta 1                                                   | 1.30E-03 | NM_008379                                                                   |
| 1712 | Tmem98                                | transmembrane protein 98                                                        | 1.30E-03 | NM_029537                                                                   |
| 1713 | Ppp2r5a                               | protein phosphatase 2, regulatory subunit B (B56), alpha isoform                | 1.30E-03 | NM_144880 /// XM_001476699                                                  |
| 1714 | Gpr177                                | G protein-coupled receptor 177                                                  | 1.30E-03 | NM_026582                                                                   |
| 1715 | Ero1l /// Rpl31                       | ERO1-like (S. cerevisiae) /// ribosomal protein L31                             | 1.30E-03 | NM_015774 /// NM_053257                                                     |
| 1716 | Klhdc3                                | kelch domain containing 3                                                       | 1.30E-03 | NM_001163729 /// NM_027910                                                  |
| 1717 | Gba                                   | glucosidase, beta, acid                                                         | 1.30E-03 | NM_001077411 /// NM_008094                                                  |
| 1718 | Dleu2                                 | deleted in lymphocytic leukemia, 2                                              | 1.30E-03 | NR_028264 /// XM_001000367 /// XM_981454                                    |
| 1719 | Cp                                    | ceruloplasmin                                                                   | 1.31E-03 | NM_001042611 /// NM_007752                                                  |
| 1720 | Pot1a                                 | protection of telomeres 1A                                                      | 1.31E-03 | NM_133931                                                                   |
| 1721 | Nampt                                 | nicotinamide phosphoribosyltransferase                                          | 1.31E-03 | NM_021524                                                                   |
| 1722 | Ssr4                                  | signal sequence receptor, delta                                                 | 1.31E-03 | NM_009279                                                                   |
| 1723 | Cyfp1                                 | cytoplasmic FMR1 interacting protein 1                                          | 1.31E-03 | NM_011370                                                                   |
| 1724 | Fcgr2b                                | Fc receptor, IgG, low affinity IIb                                              | 1.32E-03 | NM_001077189 /// NM_010187                                                  |
| 1725 | Orc2l                                 | origin recognition complex, subunit 2-like (S. cerevisiae)                      | 1.32E-03 | NM_001025378 /// NM_008765                                                  |
| 1726 | Rp2h                                  | retinitis pigmentosa 2 homolog (human)                                          | 1.32E-03 | NM_133669                                                                   |
| 1727 | Usp22                                 | ubiquitin specific peptidase 22                                                 | 1.32E-03 | NM_001004143                                                                |
| 1728 | Paxip1                                | PAX interacting (with transcription-activation domain) protein 1                | 1.32E-03 | NM_018878                                                                   |
| 1729 | Slc22a17                              | solute carrier family 22 (organic cation transporter), member 17                | 1.32E-03 | NM_021551                                                                   |
| 1730 | Rbm14                                 | RNA binding motif protein 14                                                    | 1.33E-03 | NM_019869                                                                   |
| 1731 | D10Ert641e                            | DNA segment, Chr 10, ERATO Doi 641, expressed                                   | 1.33E-03 | NM_025514                                                                   |
| 1732 | Tgfb2                                 | transforming growth factor, beta 2                                              | 1.33E-03 | NM_009367                                                                   |
| 1733 | Prelp                                 | proline arginine-rich end leucine-rich repeat                                   | 1.33E-03 | NM_054077                                                                   |
| 1734 | Kpnb1                                 | karyopherin (importin) beta 1                                                   | 1.34E-03 | NM_008379                                                                   |
| 1735 | Zcchc18                               | zinc finger, CCHC domain containing 18                                          | 1.34E-03 | NM_001035509 /// NM_001035510 /// NM_025893                                 |
| 1736 | Adam17                                | a disintegrin and metallopeptidase domain 17                                    | 1.34E-03 | NM_009615                                                                   |
| 1737 | Hist1h2bc /// Hist1h2be /// Hist1h2bf | histone cluster 1, H2bc /// histone cluster 1, H2be /// histone cluster 1, H2bf | 1.35E-03 | NM_001097979 /// NM_001110555 /// NM_023422 /// NM_178194 /// NM_178195 /// |
| 1738 | Cd55                                  | CD55 antigen                                                                    | 1.35E-03 | NM_010016                                                                   |
| 1739 | Csprs /// Gm2666 /// Gm7582           | component of Sp100-rs /// predicted gene 2666 /// predicted gene 7582           | 1.35E-03 | NM_033616 /// XM_001474231 /// XM_001474245 /// XM_979163                   |
| 1740 | Abcg4                                 | ATP-binding cassette, sub-family G (WHITE), member 4                            | 1.36E-03 | NM_138955                                                                   |
| 1741 | Irgm2                                 | immunity-related GTPase family M member 2                                       | 1.36E-03 | NM_019440                                                                   |
| 1742 | Bcl2l14                               | BCL2-like 14 (apoptosis facilitator)                                            | 1.36E-03 | NM_025778                                                                   |
| 1743 | Cd302                                 | CD302 antigen                                                                   | 1.36E-03 | NM_025422                                                                   |
| 1744 | Hpgd                                  | hydroxyprostaglandin dehydrogenase 15 (NAD)                                     | 1.37E-03 | NM_008278                                                                   |
| 1745 | Clasp2                                | CLIP associating protein 2                                                      | 1.37E-03 | NM_001081960 /// NM_001114347 /// NM_029633                                 |

|      |               |                                                                                  |          |                                                                     |
|------|---------------|----------------------------------------------------------------------------------|----------|---------------------------------------------------------------------|
| 1746 | Ascc1         | activating signal cointegrator 1 complex subunit 1                               | 1.37E-03 | NM_026937                                                           |
| 1747 | Slc16a1       | solute carrier family 16 (monocarboxylic acid transporters), member 1            | 1.37E-03 | NM_009196                                                           |
| 1748 | Rab34         | RAB34, member of RAS oncogene family                                             | 1.37E-03 | NM_001159482 /// NM_033475                                          |
| 1749 | Ccng2         | cyclin G2                                                                        | 1.37E-03 | NM_007635                                                           |
| 1750 | Arhgef18      | rho/rac guanine nucleotide exchange factor (GEF) 18                              | 1.38E-03 | NM_133962                                                           |
| 1751 | Zdhhc14       | zinc finger, DHHC domain containing 14                                           | 1.38E-03 | NM_146073                                                           |
| 1752 | Rhou          | ras homolog gene family, member U                                                | 1.38E-03 | NM_133955                                                           |
| 1753 | 2310007H09RIK | RIKEN cDNA 2310007H09 gene                                                       | 1.38E-03 | NM_029609                                                           |
| 1754 | Gcnt2         | glucosaminyl (N-acetyl) transferase 2, I-branching enzyme                        | 1.38E-03 | NM_008105 /// NM_023887 /// NM_133219                               |
| 1755 | Tmtc4         | transmembrane and tetratricopeptide repeat containing 4                          | 1.38E-03 | NM_028651                                                           |
| 1756 | Rnf11         | ring finger protein 11                                                           | 1.38E-03 | NM_013876                                                           |
| 1757 | Blzf1         | basic leucine zipper nuclear factor 1                                            | 1.39E-03 | NM_001160208 /// NM_001160209 /// NM_025505                         |
| 1758 | Rras2         | related RAS viral (r-ras) oncogene homolog 2                                     | 1.39E-03 | NM_025846                                                           |
| 1759 | Ung           | uracil DNA glycosylase                                                           | 1.39E-03 | NM_001040691 /// NM_011677                                          |
| 1760 | Tpm4          | tropomyosin 4                                                                    | 1.40E-03 | NM_001001491                                                        |
| 1761 | Pck2          | phosphoenolpyruvate carboxykinase 2 (mitochondrial)                              | 1.40E-03 | NM_028994                                                           |
| 1762 | B230308N11RIK | RIKEN cDNA B230308N11 gene                                                       | 1.40E-03 | ---                                                                 |
| 1763 | Gramd3        | GRAM domain containing 3                                                         | 1.40E-03 | NM_026240                                                           |
| 1764 | ---           | ---                                                                              | 1.40E-03 | ---                                                                 |
| 1765 | BC005685      | cDNA sequence BC005685                                                           | 1.40E-03 | ---                                                                 |
| 1766 | Trmt112       | tRNA methyltransferase 11-2 homolog (S. cerevisiae)                              | 1.41E-03 | NM_026306                                                           |
| 1767 | Gmppa         | GDP-mannose pyrophosphorylase A                                                  | 1.41E-03 | NM_133708                                                           |
| 1768 | Synpo         | synaptopodin                                                                     | 1.41E-03 | NM_001109975 /// NM_177340 /// XM_001479956 /// XM_001479958 /// XM |
| 1769 | H2-Aa         | histocompatibility 2, class II antigen A, alpha                                  | 1.41E-03 | NM_010378                                                           |
| 1770 | Pp11r         | placental protein 11 related                                                     | 1.41E-03 | NM_008902                                                           |
| 1771 | Nle1          | notchless homolog 1 (Drosophila)                                                 | 1.42E-03 | NM_145431                                                           |
| 1772 | Lrp1          | low density lipoprotein receptor-related protein 1                               | 1.42E-03 | NM_008512                                                           |
| 1773 | 4930547C10RIK | RIKEN cDNA 4930547C10 gene                                                       | 1.42E-03 | NM_026652                                                           |
| 1774 | Pip5k1c       | phosphatidylinositol-4-phosphate 5-kinase, type 1 gamma                          | 1.42E-03 | NM_001146687 /// NM_008844                                          |
| 1775 | Sephs2        | selenophosphate synthetase 2                                                     | 1.42E-03 | NM_009266                                                           |
| 1776 | Pdpm          | podoplanin                                                                       | 1.42E-03 | NM_010329                                                           |
| 1777 | D4Wsu53e      | DNA segment, Chr 4, Wayne State University 53, expressed                         | 1.42E-03 | NM_023665                                                           |
| 1778 | Pla2g7        | phospholipase A2, group VII (platelet-activating factor acetylhydrolase, plasma) | 1.43E-03 | NM_013737                                                           |
| 1779 | Spock2        | sparc/osteonectin, cwcv and kazal-like domains proteoglycan 2                    | 1.44E-03 | NM_052994                                                           |
| 1780 | Sh3tc1        | SH3 domain and tetratricopeptide repeats 1                                       | 1.44E-03 | NM_194344                                                           |
| 1781 | Tnfrsf1b      | tumor necrosis factor receptor superfamily, member 1b                            | 1.45E-03 | NM_011610                                                           |
| 1782 | Plxdc2        | plexin domain containing 2                                                       | 1.45E-03 | NM_026162                                                           |
| 1783 | Dnaja3        | DnaJ (Hsp40) homolog, subfamily A, member 3                                      | 1.46E-03 | NM_001135112 /// NM_023646                                          |
| 1784 | Clic4         | chloride intracellular channel 4 (mitochondrial)                                 | 1.46E-03 | NM_013885                                                           |
| 1785 | Cttn          | cortactin                                                                        | 1.46E-03 | NM_007803                                                           |
| 1786 | Wwtr1         | WW domain containing transcription regulator 1                                   | 1.46E-03 | NM_133784                                                           |
| 1787 | Col5a2        | collagen, type V, alpha 2                                                        | 1.46E-03 | NM_007737                                                           |
| 1788 | Pplb          | peptidylprolyl isomerase B                                                       | 1.46E-03 | NM_011149                                                           |
| 1789 | Ms4a4d        | membrane-spanning 4-domains, subfamily A, member 4D                              | 1.47E-03 | NM_025658                                                           |
| 1790 | Slc24a6       | solute carrier family 24 (sodium/potassium/calcium exchanger), member 6          | 1.47E-03 | NM_133221                                                           |
| 1791 | Mfsd6         | major facilitator superfamily domain containing 6                                | 1.47E-03 | NM_133829 /// NM_178081                                             |

|      |                            |                                                                                  |          |                                                                       |
|------|----------------------------|----------------------------------------------------------------------------------|----------|-----------------------------------------------------------------------|
| 1792 | Snx3                       | sorting nexin 3                                                                  | 1.47E-03 | NM_017472                                                             |
| 1793 | Abcd3                      | ATP-binding cassette, sub-family D (ALD), member 3                               | 1.48E-03 | NM_008991                                                             |
| 1794 | Crispld1                   | cysteine-rich secretory protein LCCL domain containing 1                         | 1.49E-03 | NM_031402                                                             |
| 1795 | Rcvrn                      | recoverin                                                                        | 1.49E-03 | NM_009038                                                             |
| 1796 | Stard5                     | STAR-related lipid transfer (START) domain containing 5                          | 1.50E-03 | NM_023377                                                             |
| 1797 | Vps45                      | vacuolar protein sorting 45 (yeast)                                              | 1.50E-03 | NM_013841                                                             |
| 1798 | Meg3                       | maternally expressed 3                                                           | 1.50E-03 | NR_003633 /// NR_027651 /// NR_027652 /// XR_035480 /// XR_035483 /// |
| 1799 | Cacna2d2                   | calcium channel, voltage-dependent, alpha 2/delta subunit 2                      | 1.50E-03 | NM_020263                                                             |
| 1800 | Pabpn1                     | poly(A) binding protein, nuclear 1                                               | 1.51E-03 | NM_019402                                                             |
| 1801 | Pcdhb22                    | protocadherin beta 22                                                            | 1.51E-03 | NM_053147                                                             |
| 1802 | Lpgat1                     | lysophosphatidylglycerol acyltransferase 1                                       | 1.52E-03 | NM_001134829 /// NM_172266                                            |
| 1803 | Usp45                      | ubiquitin specific peptidase 45                                                  | 1.52E-03 | NM_152825                                                             |
| 1804 | LOC100045866 /// Tceb1     | similar to elongation factor SIII p15 subunit /// transcription elongation facto | 1.52E-03 | NM_026456 /// XM_001475337                                            |
| 1805 | 9530028C05                 | hypothetical protein 9530028C05                                                  | 1.52E-03 | ---                                                                   |
| 1806 | Wwc2                       | WW, C2 and coiled-coil domain containing 2                                       | 1.52E-03 | NM_133791                                                             |
| 1807 | Trim41                     | tripartite motif-containing 41                                                   | 1.52E-03 | NM_145377 /// XM_001475465                                            |
| 1808 | Slc11a2                    | solute carrier family 11 (proton-coupled divalent metal ion transporters), membe | 1.52E-03 | NM_001146161 /// NM_008732                                            |
| 1809 | Inpp5d                     | inositol polyphosphate-5-phosphatase D                                           | 1.53E-03 | NM_001110192 /// NM_001110193 /// NM_010566                           |
| 1810 | Pafah1b2                   | platelet-activating factor acetylhydrolase, isoform 1b, subunit 2                | 1.53E-03 | NM_008775                                                             |
| 1811 | Psmg1                      | proteasome (prosome, macropain) assembly chaperone 1                             | 1.54E-03 | NM_019537                                                             |
| 1812 | Cnot6l                     | CCR4-NOT transcription complex, subunit 6-like                                   | 1.54E-03 | NM_144910 /// NM_178854                                               |
| 1813 | Pvr                        | poliovirus receptor                                                              | 1.54E-03 | NM_027514                                                             |
| 1814 | Sc5d                       | sterol-C5-desaturase (fungal ERG3, delta-5-desaturase) homolog (S. cerevisiae)   | 1.54E-03 | NM_172769                                                             |
| 1815 | LOC100047162 /// LOC676175 | similar to immunoglobulin kappa-chain /// similar to Ig kappa chain V-V region M | 1.55E-03 | XM_001477552 /// XM_987914                                            |
| 1816 | LOC100047093 /// Ube2h     | similar to Ubiquitin-conjugating enzyme UbcH2 /// ubiquitin-conjugating enzyme E | 1.55E-03 | NM_009459 /// XM_001477372                                            |
| 1817 | Hspa1b                     | heat shock protein 1B                                                            | 1.55E-03 | NM_010478                                                             |
| 1818 | Ggta1                      | glycoprotein galactosyltransferase alpha 1, 3                                    | 1.56E-03 | NM_001145821 /// NM_010283                                            |
| 1819 | Tpi1                       | triosephosphate isomerase 1                                                      | 1.56E-03 | NM_009415                                                             |
| 1820 | Osmr                       | oncostatin M receptor                                                            | 1.56E-03 | NM_011019                                                             |
| 1821 | Fcgrt                      | Fc receptor, IgG, alpha chain transporter                                        | 1.56E-03 | NM_010189                                                             |
| 1822 | Cd84                       | CD84 antigen                                                                     | 1.56E-03 | NM_013489                                                             |
| 1823 | Bpnt1                      | bisphosphate 3'-nucleotidase 1                                                   | 1.56E-03 | NM_011794                                                             |
| 1824 | Spred2                     | sprouty-related, EVH1 domain containing 2                                        | 1.57E-03 | NM_033523                                                             |
| 1825 | Psmc3                      | proteasome (prosome, macropain) 28 subunit, 3                                    | 1.57E-03 | NM_011192                                                             |
| 1826 | Slc6a20a                   | solute carrier family 6 (neurotransmitter transporter), member 20A               | 1.57E-03 | NM_139142                                                             |
| 1827 | Pak1ip1                    | PAK1 interacting protein 1                                                       | 1.58E-03 | NM_026550                                                             |
| 1828 | Abhd12                     | abhydrolase domain containing 12                                                 | 1.58E-03 | NM_024465                                                             |
| 1829 | Gbp6                       | guanylate binding protein 6                                                      | 1.58E-03 | NM_001083312 /// NM_145545                                            |
| 1830 | Ppt1                       | palmitoyl-protein thioesterase 1                                                 | 1.59E-03 | NM_008917                                                             |
| 1831 | Tmem205                    | transmembrane protein 205                                                        | 1.59E-03 | NM_178577                                                             |
| 1832 | Gm7204 /// Prdx1           | peroxiredoxin 1pseudogene /// peroxiredoxin 1                                    | 1.59E-03 | NM_011034 /// XM_001003388 /// XM_917437                              |
| 1833 | Speer4f                    | spermatogenesis associated glutamate (E)-rich protein 4f                         | 1.59E-03 | NM_027609                                                             |
| 1834 | Mrp15                      | mitochondrial ribosomal protein L15                                              | 1.60E-03 | NM_025300                                                             |
| 1835 | Pgd                        | phosphogluconate dehydrogenase                                                   | 1.60E-03 | NM_001081274                                                          |
| 1836 | Myo1c                      | myosin IC                                                                        | 1.60E-03 | NM_001080774 /// NM_001080775 /// NM_008659                           |
| 1837 | Ccr9                       | chemokine (C-C motif) receptor 9                                                 | 1.60E-03 | NM_009913                                                             |



|      |                                |                                                                                  |          |                                                                         |
|------|--------------------------------|----------------------------------------------------------------------------------|----------|-------------------------------------------------------------------------|
| 1838 | Itgb1                          | integrin beta 1 (fibronectin receptor beta)                                      | 1.60E-03 | NM_010578                                                               |
| 1839 | Tmem2                          | transmembrane protein 2                                                          | 1.60E-03 | NM_001033759 /// NM_031997                                              |
| 1840 | 2310061104Rik                  | RIKEN cDNA 2310061104 gene                                                       | 1.60E-03 | NM_001033630 /// XM_001002280 /// XM_128627                             |
| 1841 | Ndn                            | necdin                                                                           | 1.60E-03 | NM_010882                                                               |
| 1842 | Usp24                          | ubiquitin specific peptidase 24                                                  | 1.61E-03 | XM_001473472 /// XM_001479517 /// XM_001481281 /// XM_915524            |
| 1843 | 2310039H08Rik                  | RIKEN cDNA 2310039H08 gene                                                       | 1.61E-03 | NM_025966                                                               |
| 1844 | Dab2                           | disabled homolog 2 (Drosophila)                                                  | 1.62E-03 | NM_001008702 /// NM_001037905 /// NM_001102400 /// NM_023118            |
| 1845 | Foxq1                          | forkhead box Q1                                                                  | 1.62E-03 | NM_008239                                                               |
| 1846 | Cndp2                          | CNDP dipeptidase 2 (metallopeptidase M20 family)                                 | 1.62E-03 | NM_023149                                                               |
| 1847 | Gstm2                          | glutathione S-transferase, mu 2                                                  | 1.62E-03 | NM_008183                                                               |
| 1848 | Irf8                           | interferon regulatory factor 8                                                   | 1.62E-03 | NM_008320                                                               |
| 1849 | Ndufaf3                        | NADH dehydrogenase (ubiquinone) 1 alpha subcomplex, assembly factor 3            | 1.62E-03 | NM_023247                                                               |
| 1850 | Xrn1                           | 5'-3' exoribonuclease 1                                                          | 1.63E-03 | NM_011916                                                               |
| 1851 | Fgfr4                          | fibroblast growth factor receptor 4                                              | 1.63E-03 | NM_008011                                                               |
| 1852 | Zfp706                         | zinc finger protein 706                                                          | 1.63E-03 | NM_026521                                                               |
| 1853 | Enox2                          | ecto-NOX disulfide-thiol exchanger 2                                             | 1.63E-03 | NM_145951                                                               |
| 1854 | Etl4                           | enhancer trap locus 4                                                            | 1.64E-03 | NM_001081006                                                            |
| 1855 | D0H4S114                       | DNA segment, human D4S114                                                        | 1.64E-03 | NM_001109988 /// NM_001109989 /// NM_001109990 /// NM_053078            |
| 1856 | Atp6v0a1                       | ATPase, H+ transporting, lysosomal VO subunit A1                                 | 1.65E-03 | NM_016920                                                               |
| 1857 | Bmi1                           | Bmi1 polycomb ring finger oncogene                                               | 1.65E-03 | NM_007552                                                               |
| 1858 | Ap2b1                          | adaptor-related protein complex 2, beta 1 subunit                                | 1.66E-03 | NM_001035854 /// NM_027915                                              |
| 1859 | Slc35e4                        | solute carrier family 35, member E4                                              | 1.66E-03 | NM_153142                                                               |
| 1860 | Fastkd2                        | FAST kinase domains 2                                                            | 1.66E-03 | NM_172422                                                               |
| 1861 | LOC100045567 /// Pnp1 /// Pnp1 | similar to purine nucleoside phosphorylase /// purine-nucleoside phosphorylase 1 | 1.67E-03 | NM_001123371 /// NM_013632 /// XM_001474536 /// XM_992876 /// XM_992877 |
| 1862 | Fam107b                        | family with sequence similarity 107, member B                                    | 1.67E-03 | NM_025626                                                               |
| 1863 | Mettl7a1                       | methyltransferase like 7A1                                                       | 1.67E-03 | NM_027334                                                               |
| 1864 | Slc35a4                        | solute carrier family 35, member A4                                              | 1.67E-03 | NM_001083317 /// NM_026404                                              |
| 1865 | Dock1                          | dedicator of cytokinesis 1                                                       | 1.67E-03 | NM_001033420                                                            |
| 1866 | Crygb /// Crygc                | crystallin, gamma B /// crystallin, gamma C                                      | 1.68E-03 | NM_001082573 /// NM_007775 /// NM_144761                                |
| 1867 | Capza1                         | capping protein (actin filament) muscle Z-line, alpha 1                          | 1.68E-03 | NM_009797                                                               |
| 1868 | Aldh8a1                        | aldehyde dehydrogenase 8 family, member A1                                       | 1.69E-03 | NM_178713                                                               |
| 1869 | Ppp6c                          | protein phosphatase 6, catalytic subunit                                         | 1.70E-03 | NM_024209                                                               |
| 1870 | Trps1                          | trichorhinophalangeal syndrome I (human)                                         | 1.70E-03 | NM_032000                                                               |
| 1871 | Kpna4                          | karyopherin (importin) alpha 4                                                   | 1.70E-03 | NM_008467                                                               |
| 1872 | Hnnpab                         | heterogeneous nuclear ribonucleoprotein A/B                                      | 1.71E-03 | NM_001048061 /// NM_010448                                              |
| 1873 | Wipi1                          | WD repeat domain, phosphoinositide interacting 1                                 | 1.71E-03 | NM_145940                                                               |
| 1874 | Calm1                          | calmodulin 1                                                                     | 1.72E-03 | NM_009790                                                               |
| 1875 | Efs                            | Embryonal Fyn-associated substrate                                               | 1.72E-03 | NM_010112                                                               |
| 1876 | Dck                            | deoxycytidine kinase                                                             | 1.73E-03 | NM_007832                                                               |
| 1877 | Impdh1                         | inosine 5'-phosphate dehydrogenase 1                                             | 1.73E-03 | NM_011829                                                               |
| 1878 | Apol9a /// Apol9b              | apolipoprotein L 9a /// apolipoprotein L 9b                                      | 1.73E-03 | NM_001162883 /// NM_173743 /// NM_173786 /// XM_128064 /// XM_911305    |
| 1879 | Foxo3                          | forkhead box O3                                                                  | 1.73E-03 | NM_019740                                                               |
| 1880 | Crim1                          | cysteine rich transmembrane BMP regulator 1 (chordin like)                       | 1.73E-03 | NM_015800                                                               |
| 1881 | Pkm2                           | pyruvate kinase, muscle                                                          | 1.73E-03 | NM_011099                                                               |
| 1882 | Hexim1                         | hexamethylene bis-acetamide inducible 1                                          | 1.74E-03 | NM_138753                                                               |
| 1883 | Rpl10                          | ribosomal protein 10                                                             | 1.74E-03 | NM_052835                                                               |

|      |                       |                                                                                  |          |                                          |
|------|-----------------------|----------------------------------------------------------------------------------|----------|------------------------------------------|
| 1884 | Arid1a                | AT rich interactive domain 1A (SWI-like)                                         | 1.74E-03 | NM_001080819                             |
| 1885 | Slc30a1               | solute carrier family 30 (zinc transporter), member 1                            | 1.75E-03 | NM_009579                                |
| 1886 | Tor3a                 | torsin family 3, member A                                                        | 1.75E-03 | NM_023141                                |
| 1887 | Afp                   | alpha fetoprotein                                                                | 1.75E-03 | NM_007423                                |
| 1888 | Kctd2                 | potassium channel tetramerisation domain containing 2                            | 1.75E-03 | NM_183285                                |
| 1889 | Aldh1a3               | aldehyde dehydrogenase family 1, subfamily A3                                    | 1.75E-03 | NM_053080                                |
| 1890 | Bmp2                  | bone morphogenetic protein 2                                                     | 1.75E-03 | NM_007553                                |
| 1891 | Tnfaip2               | tumor necrosis factor, alpha-induced protein 2                                   | 1.75E-03 | NM_009396                                |
| 1892 | Pim1                  | proviral integration site 1                                                      | 1.75E-03 | NM_008842                                |
| 1893 | Zcchc10               | zinc finger, CCHC domain containing 10                                           | 1.75E-03 | NM_026479                                |
| 1894 | Slc16a2               | solute carrier family 16 (monocarboxylic acid transporters), member 2            | 1.76E-03 | NM_009197                                |
| 1895 | Rab3d                 | RAB3D, member RAS oncogene family                                                | 1.76E-03 | NM_031874                                |
| 1896 | Plekhf1               | pleckstrin homology domain containing, family F (with FYVE domain) member 1      | 1.77E-03 | NM_024413                                |
| 1897 | Hmgb1                 | high mobility group box 1                                                        | 1.77E-03 | NM_010439                                |
| 1898 | Zmynd11               | zinc finger, MYND domain containing 11                                           | 1.77E-03 | NM_144516                                |
| 1899 | Spata13               | spermatogenesis associated 13                                                    | 1.77E-03 | NM_001033272 /// XM_901902 /// XM_923227 |
| 1900 | Muc20                 | mucin 20                                                                         | 1.77E-03 | NM_001145874 /// NM_146071               |
| 1901 | Plscr2                | phospholipid scramblase 2                                                        | 1.77E-03 | NM_008880                                |
| 1902 | Bex1                  | brain expressed gene 1                                                           | 1.77E-03 | NM_009052                                |
| 1903 | Gja1                  | gap junction protein, alpha 1                                                    | 1.78E-03 | NM_010288                                |
| 1904 | Ano10                 | anoctamin 10                                                                     | 1.78E-03 | NM_133979                                |
| 1905 | Ncf4                  | neutrophil cytosolic factor 4                                                    | 1.78E-03 | NM_008677                                |
| 1906 | Herc1                 | hect (homologous to the E6-AP (UBE3A) carboxyl terminus) domain and RCC1 (CHC    | 1.79E-03 | XM_001477062 /// XM_918072               |
| 1907 | Ewsr1                 | Ewing sarcoma breakpoint region 1                                                | 1.79E-03 | NM_007968                                |
| 1908 | Rnf26                 | ring finger protein 26                                                           | 1.79E-03 | NM_153762                                |
| 1909 | LOC100048168 /// Sav1 | similar to WW45 protein /// salvador homolog 1 (Drosophila)                      | 1.80E-03 | NM_022028 /// XM_001479668               |
| 1910 | C3ar1                 | complement component 3a receptor 1                                               | 1.81E-03 | NM_009779                                |
| 1911 | Zfp260                | zinc finger protein 260                                                          | 1.81E-03 | NM_0111981                               |
| 1912 | Acbd3                 | acyl-Coenzyme A binding domain containing 3                                      | 1.81E-03 | NM_133225                                |
| 1913 | Sfpq                  | splicing factor proline/glutamine rich (polypyrimidine tract binding protein ass | 1.81E-03 | NM_023603                                |
| 1914 | Alpl                  | alkaline phosphatase, liver/bone/kidney                                          | 1.81E-03 | NM_007431                                |
| 1915 | ---                   | ---                                                                              | 1.82E-03 | ---                                      |
| 1916 | Rgs19                 | regulator of G-protein signaling 19                                              | 1.82E-03 | NM_026446                                |
| 1917 | 3632451O06Rik         | RIKEN cDNA 3632451O06 gene                                                       | 1.82E-03 | NM_026142                                |
| 1918 | Scamp1                | secretory carrier membrane protein 1                                             | 1.83E-03 | NM_029153                                |
| 1919 | Cyp7b1                | cytochrome P450, family 7, subfamily b, polypeptide 1                            | 1.83E-03 | NM_007825                                |
| 1920 | Smarcaad1             | SWI/SNF-related, matrix-associated actin-dependent regulator of chromatin, subfa | 1.83E-03 | NM_007958                                |
| 1921 | Impdh2                | inosine 5'-phosphate dehydrogenase 2                                             | 1.84E-03 | NM_011830                                |
| 1922 | Cdca7l                | cell division cycle associated 7 like                                            | 1.84E-03 | NM_146040                                |
| 1923 | Tuba1b                | tubulin, alpha 1B                                                                | 1.84E-03 | NM_011654                                |
| 1924 | Reep5                 | receptor accessory protein 5                                                     | 1.84E-03 | NM_007874                                |
| 1925 | Pfn2                  | profilin 2                                                                       | 1.85E-03 | NM_019410                                |
| 1926 | Emr1                  | EGF-like module containing, mucin-like, hormone receptor-like sequence 1         | 1.85E-03 | NM_010130                                |
| 1927 | 2310002J15RIK         | RIKEN cDNA 2310002J15 gene                                                       | 1.85E-03 | NM_026415                                |
| 1928 | Ube4b                 | ubiquitination factor E4B, UFD2 homolog (S. cerevisiae)                          | 1.85E-03 | NM_022022 /// XM_001477015               |
| 1929 | Lime1                 | Lck interacting transmembrane adaptor 1                                          | 1.85E-03 | NM_023684                                |

|      |                          |                                                                                  |          |                                                                     |
|------|--------------------------|----------------------------------------------------------------------------------|----------|---------------------------------------------------------------------|
| 1930 | Cbx4                     | chromobox homolog 4 (Drosophila Pc class)                                        | 1.85E-03 | NM_007625                                                           |
| 1931 | Mrpl3                    | mitochondrial ribosomal protein L3                                               | 1.86E-03 | NM_053159                                                           |
| 1932 | Gyg                      | glycogenin                                                                       | 1.86E-03 | NM_013755                                                           |
| 1933 | Pvr                      | poliovirus receptor                                                              | 1.87E-03 | NM_027514                                                           |
| 1934 | Tmem123                  | transmembrane protein 123                                                        | 1.87E-03 | NM_133739                                                           |
| 1935 | Ppp1r15b                 | protein phosphatase 1, regulatory (inhibitor) subunit 15b                        | 1.87E-03 | NM_133819                                                           |
| 1936 | Ccdc28a /// LOC100045472 | coiled-coil domain containing 28A /// similar to coiled-coil domain containing 2 | 1.87E-03 | NM_144820 /// XR_031647                                             |
| 1937 | Rps21                    | ribosomal protein S21                                                            | 1.88E-03 | NM_025587                                                           |
| 1938 | Fam125b                  | family with sequence similarity 125, member B                                    | 1.88E-03 | NM_175184                                                           |
| 1939 | Gm15365 /// Tomm20       | predicted gene 15365 /// translocase of outer mitochondrial membrane 20 homolog  | 1.88E-03 | NM_024214 /// XM_001475536                                          |
| 1940 | Gab1                     | growth factor receptor bound protein 2-associated protein 1                      | 1.88E-03 | NM_021356                                                           |
| 1941 | Vwf                      | Von Willebrand factor homolog                                                    | 1.89E-03 | NM_011708                                                           |
| 1942 | Hmg20a                   | high mobility group 20A                                                          | 1.89E-03 | NM_025812                                                           |
| 1943 | Stx5a                    | syntaxin 5A                                                                      | 1.89E-03 | NM_019829                                                           |
| 1944 | Isy1                     | ISY1 splicing factor homolog (S. cerevisiae)                                     | 1.90E-03 | NM_133934                                                           |
| 1945 | Ip6k1                    | inositol hexaphosphate kinase 1                                                  | 1.91E-03 | NM_013785                                                           |
| 1946 | Cyp2c50                  | cytochrome P450, family 2, subfamily c, polypeptide 50                           | 1.92E-03 | NM_134144                                                           |
| 1947 | Tlr2                     | toll-like receptor 2                                                             | 1.92E-03 | NM_011905                                                           |
| 1948 | Marcks1                  | MARCKS-like 1                                                                    | 1.92E-03 | NM_010807                                                           |
| 1949 | Tecr                     | trans-2,3-enoyl-CoA reductase                                                    | 1.93E-03 | NM_027179 /// NM_134118                                             |
| 1950 | Huwe1                    | HECT, UBA and WWE domain containing 1                                            | 1.93E-03 | NM_021523                                                           |
| 1951 | Ggnbp2                   | gametogenetin binding protein 2                                                  | 1.93E-03 | NM_153144                                                           |
| 1952 | Setd3                    | SET domain containing 3                                                          | 1.93E-03 | NM_028262                                                           |
| 1953 | ---                      | ---                                                                              | 1.94E-03 | ---                                                                 |
| 1954 | Tmem119                  | transmembrane protein 119                                                        | 1.94E-03 | NM_146162                                                           |
| 1955 | Lamb1-1                  | laminin B1 subunit 1                                                             | 1.94E-03 | NM_008482                                                           |
| 1956 | Tbca                     | tubulin cofactor A                                                               | 1.94E-03 | NM_009321                                                           |
| 1957 | Mef2b                    | myocyte enhancer factor 2B                                                       | 1.94E-03 | NM_001045484 /// NM_008578 /// XM_486121 /// XM_922052              |
| 1958 | LOC100044953 /// Ppp1cb  | similar to protein phosphatase 1 /// protein phosphatase 1, catalytic subunit, b | 1.94E-03 | NM_172707 /// XR_031192                                             |
| 1959 | Fam117a                  | family with sequence similarity 117, memberA                                     | 1.94E-03 | NM_172543                                                           |
| 1960 | Ccl2                     | chemokine (C-C motif) ligand 2                                                   | 1.94E-03 | NM_011333                                                           |
| 1961 | Cpz                      | carboxypeptidase Z                                                               | 1.94E-03 | NM_153107                                                           |
| 1962 | Slc3a1                   | solute carrier family 3, member 1                                                | 1.95E-03 | NM_009205                                                           |
| 1963 | Rapgef1                  | Rap guanine nucleotide exchange factor (GEF) 1                                   | 1.95E-03 | NM_001039086 /// NM_001039087 /// NM_054050                         |
| 1964 | Pias1                    | protein inhibitor of activated STAT 1                                            | 1.95E-03 | NM_019663                                                           |
| 1965 | Scoc                     | short coiled-coil protein                                                        | 1.95E-03 | NM_001039137 /// NM_019708                                          |
| 1966 | 2900073G15Rik            | RIKEN cDNA 2900073G15 gene                                                       | 1.95E-03 | NM_026064                                                           |
| 1967 | 2010107E04Rik            | RIKEN cDNA 2010107E04 gene                                                       | 1.95E-03 | NM_027360                                                           |
| 1968 | Pfkp                     | phosphofructokinase, platelet                                                    | 1.97E-03 | NM_019703                                                           |
| 1969 | Sptlc2                   | serine palmitoyltransferase, long chain base subunit 2                           | 1.97E-03 | NM_011479                                                           |
| 1970 | Prodh                    | proline dehydrogenase                                                            | 1.97E-03 | NM_011172                                                           |
| 1971 | Maf1                     | MAF1 homolog (S. cerevisiae)                                                     | 1.97E-03 | NM_026859                                                           |
| 1972 | Man2c1                   | mannosidase, alpha, class 2C, member 1                                           | 1.97E-03 | NM_028636                                                           |
| 1973 | Gabarapl2                | gamma-aminobutyric acid (GABA) A receptor-associated protein-like 2              | 1.97E-03 | NM_026693                                                           |
| 1974 | Mrps14                   | mitochondrial ribosomal protein S14                                              | 1.97E-03 | NM_025474                                                           |
| 1975 | Cugbp2                   | CUG triplet repeat, RNA binding protein 2                                        | 1.97E-03 | NM_001110228 /// NM_001110229 /// NM_001110230 /// NM_001110231 /// |

|      |                                 |                                                                                     |          |                                                                               |
|------|---------------------------------|-------------------------------------------------------------------------------------|----------|-------------------------------------------------------------------------------|
| 1976 | Ube2j1                          | ubiquitin-conjugating enzyme E2, J1                                                 | 1.97E-03 | NM_019586                                                                     |
| 1977 | Rbm17                           | RNA binding motif protein 17                                                        | 1.98E-03 | NM_152824                                                                     |
| 1978 | Ncstn                           | nicastrin                                                                           | 1.98E-03 | NM_021607                                                                     |
| 1979 | Mat2a                           | methionine adenosyltransferase II, alpha                                            | 1.99E-03 | NM_145569                                                                     |
| 1980 | Tmem49                          | transmembrane protein 49                                                            | 1.99E-03 | NM_029478                                                                     |
| 1981 | Taok3                           | TAO kinase 3                                                                        | 1.99E-03 | NM_001081308                                                                  |
| 1982 | Gm11263 /// Gm12242 /// Gm13654 | predicted gene 11263 /// predicted gene 12242 /// predicted gene 13654              | 1.99E-03 | NM_009096 /// XM_001001005 /// XM_001003926 /// XM_001476577 /// XM_001477571 |
| 1983 | Sgpp1                           | sphingosine-1-phosphate phosphatase 1                                               | 1.99E-03 | NM_030750                                                                     |
| 1984 | LOC100047324 /// Sesn1          | similar to Sesn1 protein /// sestrin 1                                              | 1.99E-03 | NM_001013370 /// NM_001162908 /// XM_001477554 /// XM_001477571               |
| 1985 | Cpeb3                           | cytoplasmic polyadenylation element binding protein 3                               | 1.99E-03 | NM_198300                                                                     |
| 1986 | Stambp1                         | STAM binding protein like 1                                                         | 2.00E-03 | NM_029682                                                                     |
| 1987 | 2310044G17Rik                   | RIKEN cDNA 2310044G17 gene                                                          | 2.00E-03 | NM_173735                                                                     |
| 1988 | Cbx1                            | chromobox homolog 1 (Drosophila HP1 beta)                                           | 2.01E-03 | NM_007622                                                                     |
| 1989 | Crk                             | v-crk sarcoma virus CT10 oncogene homolog (avian)                                   | 2.01E-03 | NM_133656                                                                     |
| 1990 | Col6a3                          | collagen, type VI, alpha 3                                                          | 2.01E-03 | XM_001474562 /// XM_897036                                                    |
| 1991 | Eny2                            | enhancer of yellow 2 homolog (Drosophila)                                           | 2.01E-03 | NM_175009                                                                     |
| 1992 | Nr3c1                           | nuclear receptor subfamily 3, group C, member 1                                     | 2.01E-03 | NM_008173                                                                     |
| 1993 | Acad11 /// Nphp3                | acyl-Coenzyme A dehydrogenase family, member 11 /// nephronophthisis 3 (adolescent) | 2.01E-03 | NM_028721 /// NM_172460 /// NM_175324                                         |
| 1994 | Cdkl2                           | cyclin-dependent kinase-like 2 (CDC2-related kinase)                                | 2.01E-03 | NM_016912 /// NM_177270                                                       |
| 1995 | Cox18                           | COX18 cytochrome c oxidase assembly homolog (S. cerevisiae)                         | 2.01E-03 | NM_001033310 /// NM_001163456 /// NR_028088                                   |
| 1996 | Kif1b                           | kinesin family member 1B                                                            | 2.01E-03 | NM_008441 /// NM_207682                                                       |
| 1997 | Slc30a7                         | solute carrier family 30 (zinc transporter), member 7                               | 2.03E-03 | NM_023214                                                                     |
| 1998 | Grhl2                           | grainyhead-like 2 (Drosophila)                                                      | 2.03E-03 | NM_026496                                                                     |
| 1999 | Rnf26                           | ring finger protein 26                                                              | 2.04E-03 | NM_153762                                                                     |
| 2000 | Pdxdc1                          | pyridoxal-dependent decarboxylase domain containing 1                               | 2.04E-03 | NM_001039533 /// NM_053181                                                    |
| 2001 | Hnrnpa2b1                       | heterogeneous nuclear ribonucleoprotein A2/B1                                       | 2.04E-03 | NM_016806 /// NM_182650                                                       |
| 2002 | Gypc                            | glycophorin C                                                                       | 2.04E-03 | NM_001048207                                                                  |
| 2003 | Enah                            | enabled homolog (Drosophila)                                                        | 2.05E-03 | NM_001083120 /// NM_001083121 /// NM_008680 /// NM_010135                     |
| 2004 | Ctdsp2 /// Gm9770               | CTD (carboxy-terminal domain, RNA polymerase II, polypeptide A) small phosphatase 2 | 2.05E-03 | NM_001113470 /// NM_146012 /// XR_032943 /// XR_034953                        |
| 2005 | Arid1a                          | AT rich interactive domain 1A (SWI-like)                                            | 2.05E-03 | NM_001080819                                                                  |
| 2006 | Fcrla                           | Fc receptor-like A                                                                  | 2.05E-03 | NM_001160215 /// NM_145141 /// NR_027666                                      |
| 2007 | Wdr6                            | WD repeat domain 6                                                                  | 2.05E-03 | NM_031392                                                                     |
| 2008 | 2310014H01Rik                   | RIKEN cDNA 2310014H01 gene                                                          | 2.05E-03 | NM_001146710 /// NM_001146711 /// NM_175242 /// XM_001003622 /// XM_001003623 |
| 2009 | Silt2                           | silt homolog 2 (Drosophila)                                                         | 2.05E-03 | NM_178804                                                                     |
| 2010 | Rhog                            | ras homolog gene family, member G                                                   | 2.06E-03 | NM_019566                                                                     |
| 2011 | Mrpl15                          | mitochondrial ribosomal protein L15                                                 | 2.06E-03 | NM_025300                                                                     |
| 2012 | Atp6v1a                         | ATPase, H+ transporting, lysosomal V1 subunit A                                     | 2.06E-03 | NM_007508                                                                     |
| 2013 | Dnpep                           | aspartyl aminopeptidase                                                             | 2.07E-03 | NM_001110831 /// NM_016878                                                    |
| 2014 | Mmp9                            | matrix metalloproteinase 9                                                          | 2.07E-03 | NM_013599                                                                     |
| 2015 | Pisd /// Pisd-ps1 /// Pisd-ps3  | phosphatidylserine decarboxylase /// phosphatidylserine decarboxylase, pseudogen    | 2.07E-03 | NM_177298 /// NR_003517 /// NR_003518 /// XM_001471470 /// XR_035646          |
| 2016 | Akap1                           | A kinase (PRKA) anchor protein 1                                                    | 2.08E-03 | NM_001042541 /// NM_009648                                                    |
| 2017 | Blmh                            | bleomycin hydrolase                                                                 | 2.08E-03 | NM_178645                                                                     |
| 2018 | Acad11 /// Nphp3                | acyl-Coenzyme A dehydrogenase family, member 11 /// nephronophthisis 3 (adolescent) | 2.08E-03 | NM_028721 /// NM_172460 /// NM_175324                                         |
| 2019 | Igj                             | immunoglobulin joining chain                                                        | 2.09E-03 | NM_152839                                                                     |
| 2020 | Pcnx13                          | pecanex-like 3 (Drosophila)                                                         | 2.09E-03 | NM_144868                                                                     |
| 2021 | ---                             | ---                                                                                 | 2.09E-03 | ---                                                                           |

|      |                          |                                                                                  |          |                                                        |
|------|--------------------------|----------------------------------------------------------------------------------|----------|--------------------------------------------------------|
| 2022 | Ergic1                   | endoplasmic reticulum-golgi intermediate compartment (ERGIC) 1                   | 2.10E-03 | NM_026170                                              |
| 2023 | Podxl                    | podocalyxin-like                                                                 | 2.10E-03 | NM_013723                                              |
| 2024 | Cd33                     | CD33 antigen                                                                     | 2.10E-03 | NM_001111058 /// NM_021293                             |
| 2025 | D630032N06RIK            | RIKEN cDNA D630032N06 gene                                                       | 2.10E-03 | NR_028329 /// XR_035235 /// XR_035464                  |
| 2026 | Hist1h3d                 | histone cluster 1, H3d                                                           | 2.10E-03 | NM_178204                                              |
| 2027 | Immt                     | inner membrane protein, mitochondrial                                            | 2.10E-03 | NM_029673                                              |
| 2028 | Anapc13                  | anaphase promoting complex subunit 13                                            | 2.11E-03 | NM_181394                                              |
| 2029 | Zfpm2                    | zinc finger protein, multitype 2                                                 | 2.11E-03 | NM_011766                                              |
| 2030 | Cdk2ap1 /// LOC100047490 | CDK2 (cyclin-dependent kinase 2)-associated protein 1 /// similar to putative or | 2.11E-03 | NM_013812 /// XM_001478266                             |
| 2031 | Ms4a1                    | membrane-spanning 4-domains, subfamily A, member 1                               | 2.11E-03 | NM_007641                                              |
| 2032 | Lilrb3                   | leukocyte immunoglobulin-like receptor, subfamily B (with TM and ITIM domains),  | 2.11E-03 | NM_011095                                              |
| 2033 | Cort                     | cortistatin                                                                      | 2.12E-03 | NM_007745                                              |
| 2034 | 1110058L19RIK            | RIKEN cDNA 1110058L19 gene                                                       | 2.12E-03 | NM_026503                                              |
| 2035 | LOC100047693 /// Pvr13   | similar to cell adhesion molecule nectin-3 beta /// poliovirus receptor-related  | 2.12E-03 | NM_021495 /// NM_021496 /// NM_021497 /// XM_001478695 |
| 2036 | Zfp503                   | zinc finger protein 503                                                          | 2.12E-03 | NM_145459                                              |
| 2037 | Cct4                     | chaperonin containing Tcp1, subunit 4 (delta)                                    | 2.12E-03 | NM_009837                                              |
| 2038 | Chn1                     | chimerin (chimaerin) 1                                                           | 2.12E-03 | NM_001113246 /// NM_029716 /// NM_175752               |
| 2039 | Elt1d1                   | EGF, latrophilin seven transmembrane domain containing 1                         | 2.13E-03 | NM_133222                                              |
| 2040 | Wsb1                     | WD repeat and SOCS box-containing 1                                              | 2.13E-03 | NM_001042565 /// NM_019653                             |
| 2041 | Oxct1                    | 3-oxoacid CoA transferase 1                                                      | 2.13E-03 | NM_024188                                              |
| 2042 | Hbp1                     | high mobility group box transcription factor 1                                   | 2.13E-03 | NM_153198 /// NM_177993                                |
| 2043 | Scd1                     | stearoyl-Coenzyme A desaturase 1                                                 | 2.13E-03 | NM_009127                                              |
| 2044 | Mapk6                    | mitogen-activated protein kinase 6                                               | 2.14E-03 | NM_015806 /// NM_027418                                |
| 2045 | Asb13                    | ankyrin repeat and SOCS box-containing 13                                        | 2.14E-03 | NM_080857 /// NM_178283                                |
| 2046 | Itga2b                   | integrin alpha 2b                                                                | 2.14E-03 | NM_010575                                              |
| 2047 | Coro2b                   | coronin, actin binding protein, 2B                                               | 2.14E-03 | NM_175484                                              |
| 2048 | Ptgr1                    | prostaglandin reductase 1                                                        | 2.15E-03 | NM_025968                                              |
| 2049 | Thap7                    | THAP domain containing 7                                                         | 2.15E-03 | NM_026909                                              |
| 2050 | Ms4a4c                   | membrane-spanning 4-domains, subfamily A, member 4C                              | 2.15E-03 | NM_029499                                              |
| 2051 | Cnp                      | 2',3'-cyclic nucleotide 3' phosphodiesterase                                     | 2.16E-03 | NM_001146318 /// NM_009923                             |
| 2052 | Ms4a1                    | membrane-spanning 4-domains, subfamily A, member 1                               | 2.16E-03 | NM_007641                                              |
| 2053 | Sult1a1                  | sulfotransferase family 1A, phenol-preferring, member 1                          | 2.16E-03 | NM_133670                                              |
| 2054 | Slk                      | STE20-like kinase (yeast)                                                        | 2.17E-03 | NM_009289                                              |
| 2055 | 5730469M10RIK            | RIKEN cDNA 5730469M10 gene                                                       | 2.17E-03 | NM_027464                                              |
| 2056 | B9d2                     | B9 protein domain 2                                                              | 2.17E-03 | NM_172148                                              |
| 2057 | Brc1                     | breast cancer 1                                                                  | 2.18E-03 | NM_009764                                              |
| 2058 | Pls1                     | plastin 1 (l-isoform)                                                            | 2.18E-03 | NM_001033210                                           |
| 2059 | Wwox                     | WW domain-containing oxidoreductase                                              | 2.18E-03 | NM_019573                                              |
| 2060 | Pus3                     | pseudouridine synthase 3                                                         | 2.18E-03 | NM_023292                                              |
| 2061 | Ube2d3                   | ubiquitin-conjugating enzyme E2D 3 (UBC4/5 homolog, yeast)                       | 2.19E-03 | NM_025356                                              |
| 2062 | Ppp2r2d                  | protein phosphatase 2, regulatory subunit B, delta isoform                       | 2.19E-03 | NM_026391                                              |
| 2063 | Mff                      | mitochondrial fission factor                                                     | 2.19E-03 | NM_029409                                              |
| 2064 | Scarb2                   | scavenger receptor class B, member 2                                             | 2.20E-03 | NM_007644                                              |
| 2065 | Mybph                    | myosin binding protein H                                                         | 2.20E-03 | NM_016749                                              |
| 2066 | Pias3                    | protein inhibitor of activated STAT 3                                            | 2.20E-03 | NM_018812 /// NM_146135                                |
| 2067 | Retn                     | resistin                                                                         | 2.21E-03 | NM_022984                                              |

|      |                             |                                                                                   |          |                                                                   |
|------|-----------------------------|-----------------------------------------------------------------------------------|----------|-------------------------------------------------------------------|
| 2068 | Zdhhc8                      | zinc finger, DHHC domain containing 8                                             | 2.21E-03 | NM_172151                                                         |
| 2069 | Cyhr1                       | cysteine and histidine rich 1                                                     | 2.21E-03 | NM_019396 /// NM_180962                                           |
| 2070 | D10Jhu81e                   | ·DNA segment, Chr 10, Johns Hopkins University 81 expressed                       | 2.22E-03 | NM_138601                                                         |
| 2071 | Trim21                      | ·tripartite motif-containing 21                                                   | 2.22E-03 | NM_001082552 /// NM_009277                                        |
| 2072 | Emi5                        | ·echinoderm microtubule associated protein like 5                                 | 2.22E-03 | NM_001081191                                                      |
| 2073 | Elov1                       | ·elongation of very long chain fatty acids (FEN1/Elo2, SUR4/Elo3, yeast)-like 1   | 2.23E-03 | NM_001039175 /// NM_001039176 /// NM_019422                       |
| 2074 | Hars                        | ·histidyl-tRNA synthetase                                                         | 2.23E-03 | NM_008214                                                         |
| 2075 | Ip6k1                       | ·inositol hexaphosphate kinase 1                                                  | 2.24E-03 | NM_013785                                                         |
| 2076 | LOC668727 /// Mrgpra2       | ·similar to Mrgpra2 protein /// MAS-related GPR, member A2                        | 2.24E-03 | NM_153101 /// XM_001003345                                        |
| 2077 | Casp2                       | ·caspase 2                                                                        | 2.24E-03 | NM_007610                                                         |
| 2078 | Tlr3                        | ·toll-like receptor 3                                                             | 2.24E-03 | NM_126166                                                         |
| 2079 | Hspa8                       | ·heat shock protein 8                                                             | 2.24E-03 | NM_031165                                                         |
| 2080 | Ccdc123                     | ·coiled-coil domain containing 123                                                | 2.25E-03 | NM_028120                                                         |
| 2081 | Mfsd6                       | ·major facilitator superfamily domain containing 6                                | 2.25E-03 | NM_133829 /// NM_178081                                           |
| 2082 | Tfpi2                       | ·tissue factor pathway inhibitor 2                                                | 2.25E-03 | NM_009364                                                         |
| 2083 | Prpf4b                      | ·PRP4 pre-mRNA processing factor 4 homolog B (yeast)                              | 2.25E-03 | NM_013830                                                         |
| 2084 | Bzw1 /// Gm11652 /// Gm5191 | ·basic leucine zipper and W2 domains 1 /// basic leucine zipper and W2 domains 1  | 2.25E-03 | NM_025824 /// XR_030943 /// XR_031052 /// XR_032615 /// XR_034329 |
| 2085 | Tpi1                        | ·triosephosphate isomerase 1                                                      | 2.26E-03 | NM_009415                                                         |
| 2086 | Dag1                        | ·dystroglycan 1                                                                   | 2.26E-03 | NM_010017                                                         |
| 2087 | Slain2                      | ·SLAIN motif family, member 2                                                     | 2.26E-03 | NM_001113423 /// NM_153567                                        |
| 2088 | Mtf2                        | ·metal response element binding transcription factor 2                            | 2.26E-03 | NM_013827                                                         |
| 2089 | 2810405K02Rik               | ·RIKEN cDNA 2810405K02 gene                                                       | 2.27E-03 | NM_025582                                                         |
| 2090 | Socs4                       | ·suppressor of cytokine signaling 4                                               | 2.27E-03 | NM_080843                                                         |
| 2091 | Ndufs8                      | ·NADH dehydrogenase (ubiquinone) Fe-S protein 8                                   | 2.27E-03 | NM_144870                                                         |
| 2092 | Wdfy2                       | ·WD repeat and FYVE domain containing 2                                           | 2.27E-03 | NM_175546                                                         |
| 2093 | Ogt                         | ·O-linked N-acetylglucosamine (GlcNAc) transferase (UDP-N-acetylglucosamine:polyr | 2.28E-03 | NM_139144                                                         |
| 2094 | Crkl                        | ·v-crk sarcoma virus CT10 oncogene homolog (avian)-like                           | 2.28E-03 | NM_007764                                                         |
| 2095 | Acaa2                       | ·acetyl-Coenzyme A acyltransferase 2 (mitochondrial 3-oxoacyl-Coenzyme A thiolase | 2.29E-03 | NM_177470                                                         |
| 2096 | Pycr1                       | ·pyrroline-5-carboxylate reductase 1                                              | 2.29E-03 | NM_144795                                                         |
| 2097 | Pdxp                        | ·pyridoxal (pyridoxine, vitamin B6) phosphatase                                   | 2.29E-03 | NM_020271                                                         |
| 2098 | 6330578E17Rik               | ·RIKEN cDNA 6330578E17 gene                                                       | 2.29E-03 | NM_198006                                                         |
| 2099 | Cap1                        | ·CAP, adenylate cyclase-associated protein 1 (yeast)                              | 2.30E-03 | NM_007598                                                         |
| 2100 | Edem1                       | ·ER degradation enhancer, mannosidase alpha-like 1                                | 2.30E-03 | NM_138677                                                         |
| 2101 | Ssr4                        | ·signal sequence receptor, delta                                                  | 2.30E-03 | NM_009279                                                         |
| 2102 | Nbn                         | ·nibrin                                                                           | 2.31E-03 | NM_013752                                                         |
| 2103 | Cops5                       | ·COP9 (constitutive photomorphogenic) homolog, subunit 5 (Arabidopsis thaliana)   | 2.31E-03 | NM_013715                                                         |
| 2104 | Rps6ka2                     | ·ribosomal protein S6 kinase, polypeptide 2                                       | 2.31E-03 | NM_011299                                                         |
| 2105 | Ctnnb1                      | ·catenin, beta like 1                                                             | 2.31E-03 | NM_025680                                                         |
| 2106 | Col4a5                      | ·collagen, type IV, alpha 5                                                       | 2.31E-03 | NM_001163155 /// NM_007736                                        |
| 2107 | F11r                        | ·F11 receptor                                                                     | 2.32E-03 | NM_172647                                                         |
| 2108 | Sesn2                       | ·sestrin 2                                                                        | 2.32E-03 | NM_144907                                                         |
| 2109 | Arap1                       | ·ArfGAP with RhoGAP domain, ankyrin repeat and PH domain 1                        | 2.33E-03 | NM_001040111 /// NM_001040112 /// NM_027180 /// NM_198096         |
| 2110 | Wdr33                       | ·WD repeat domain 33                                                              | 2.33E-03 | NM_028866                                                         |
| 2111 | Prdx1                       | ·peroxiredoxin 1                                                                  | 2.34E-03 | NM_011034                                                         |
| 2112 | Zfp426                      | ·zinc finger protein 426                                                          | 2.34E-03 | NM_001110309 /// NM_146221                                        |
| 2113 | Gpatch2                     | ·G patch domain containing 2                                                      | 2.34E-03 | NM_026367                                                         |

|      |                            |                                                                                  |          |                                                                     |
|------|----------------------------|----------------------------------------------------------------------------------|----------|---------------------------------------------------------------------|
| 2114 | LOC100048168 /// Sav1      | similar to WW45 protein /// salvador homolog 1 (Drosophila)                      | 2.35E-03 | NM_022028 /// XM_001479668                                          |
| 2115 | Gm10709 /// Gm13841 /// Gm | predicted gene 10709 /// predicted gene 13841 /// predicted gene 3550 /// predic | 2.35E-03 | NM_009082 /// XM_001473311 /// XM_001474601 /// XM_001475711 /// XM |
| 2116 | Ehd1                       | EH-domain containing 1                                                           | 2.36E-03 | NM_010119                                                           |
| 2117 | Zwint                      | ZW10 interactor                                                                  | 2.36E-03 | NM_025635                                                           |
| 2118 | Smyd5                      | SET and MYND domain containing 5                                                 | 2.36E-03 | NM_144918                                                           |
| 2119 | Enpp2                      | ectonucleotide pyrophosphatase/phosphodiesterase 2                               | 2.37E-03 | NM_001136077 /// NM_015744                                          |
| 2120 | Birc2                      | baculoviral IAP repeat-containing 2                                              | 2.37E-03 | NM_007465                                                           |
| 2121 | Prr12                      | proline rich 12                                                                  | 2.37E-03 | NM_175022 /// XM_001003082 /// XM_914632                            |
| 2122 | Cry2                       | cryptochrome 2 (photolyase-like)                                                 | 2.37E-03 | NM_001113333 /// NM_009963                                          |
| 2123 | Cdv3                       | carnitine deficiency-associated gene expressed in ventricle 3                    | 2.38E-03 | NM_001134426 /// NM_001134427 /// NM_175565 /// NM_175833           |
| 2124 | Shfm1                      | split hand/foot malformation (ectrodactyly) type 1                               | 2.39E-03 | NM_009169                                                           |
| 2125 | 1810026J23Rik              | RIKEN cDNA 1810026J23 gene                                                       | 2.39E-03 | NM_178619                                                           |
| 2126 | Pcmt1                      | protein-L-isoaspartate (D-aspartate) O-methyltransferase domain containing 1     | 2.39E-03 | NM_183028                                                           |
| 2127 | Sec14l2                    | SEC14-like 2 (S. cerevisiae)                                                     | 2.39E-03 | NM_144520                                                           |
| 2128 | Glis2                      | GLIS family zinc finger 2                                                        | 2.40E-03 | NM_031184                                                           |
| 2129 | Nckap1l                    | NCK associated protein 1 like                                                    | 2.40E-03 | NM_153505                                                           |
| 2130 | Sico3a1                    | solute carrier organic anion transporter family, member 3a1                      | 2.41E-03 | NM_001038643 /// NM_023908                                          |
| 2131 | Pard6g                     | par-6 partitioning defective 6 homolog gamma (C. elegans)                        | 2.42E-03 | NM_053117                                                           |
| 2132 | Ptpn12                     | protein tyrosine phosphatase, non-receptor type 12                               | 2.43E-03 | NM_011203                                                           |
| 2133 | Tra2a                      | transformer 2 alpha homolog (Drosophila)                                         | 2.43E-03 | NM_198102                                                           |
| 2134 | Rbms1                      | RNA binding motif, single stranded interacting protein 1                         | 2.43E-03 | NM_001141931 /// NM_001141932 /// NM_020296                         |
| 2135 | Cd81                       | CD81 antigen                                                                     | 2.43E-03 | NM_133655                                                           |
| 2136 | Pacrgl                     | PARK2 co-regulated-like                                                          | 2.43E-03 | NM_025755                                                           |
| 2137 | Vps26a                     | vacuolar protein sorting 26 homolog A (yeast)                                    | 2.43E-03 | NM_001113355 /// NM_133672                                          |
| 2138 | Mpa2l                      | macrophage activation 2 like                                                     | 2.43E-03 | NM_194336                                                           |
| 2139 | H13                        | histocompatibility 13                                                            | 2.44E-03 | NM_001159551 /// NM_001159552 /// NM_001159553 /// NM_010376        |
| 2140 | Fzd6                       | frizzled homolog 6 (Drosophila)                                                  | 2.44E-03 | NM_001162494 /// NM_008056                                          |
| 2141 | Dnajc28                    | DnaJ (Hsp40) homolog, subfamily C, member 28                                     | 2.44E-03 | NM_001099738 /// NM_138664                                          |
| 2142 | Ptpn21                     | protein tyrosine phosphatase, non-receptor type 21                               | 2.44E-03 | NM_001146199 /// NM_011877                                          |
| 2143 | Tsc1                       | tuberous sclerosis 1                                                             | 2.45E-03 | NM_022887                                                           |
| 2144 | 1810009A15Rik              | RIKEN cDNA 1810009A15 gene                                                       | 2.45E-03 | NM_025463                                                           |
| 2145 | Ubf1                       | ubiquitin family domain containing 1                                             | 2.45E-03 | NM_138589                                                           |
| 2146 | Cd22                       | CD22 antigen                                                                     | 2.47E-03 | NM_001043317 /// NM_009845                                          |
| 2147 | Cdkn2b                     | cyclin-dependent kinase inhibitor 2B (p15, inhibits CDK4)                        | 2.47E-03 | NM_007670                                                           |
| 2148 | Habp2                      | hyaluronic acid binding protein 2                                                | 2.48E-03 | NM_146101                                                           |
| 2149 | Copg2as2                   | coatamer protein complex, subunit gamma 2, antisense 2                           | 2.48E-03 | NR_002845 /// XM_001471930                                          |
| 2150 | Cstb                       | cystatin B                                                                       | 2.48E-03 | NM_007793                                                           |
| 2151 | Polr2h                     | polymerase (RNA) II (DNA directed) polypeptide H                                 | 2.48E-03 | NM_145632                                                           |
| 2152 | Ola1                       | Obg-like ATPase 1                                                                | 2.49E-03 | NM_025942 /// NM_030091                                             |
| 2153 | Arid3b                     | AT rich interactive domain 3B (BRIGHT-like)                                      | 2.50E-03 | NM_019689                                                           |
| 2154 | Cytsb                      | cytospin B                                                                       | 2.50E-03 | NM_001029936                                                        |
| 2155 | Map2k5                     | mitogen-activated protein kinase kinase 5                                        | 2.51E-03 | NM_011840                                                           |
| 2156 | Adh1                       | alcohol dehydrogenase 1 (class I)                                                | 2.51E-03 | NM_007409                                                           |
| 2157 | Ube2l3                     | ubiquitin-conjugating enzyme E2L 3                                               | 2.52E-03 | NM_009456                                                           |
| 2158 | Cttn                       | cortactin                                                                        | 2.52E-03 | NM_007803                                                           |
| 2159 | Gadd45b                    | growth arrest and DNA-damage-inducible 45 beta                                   | 2.52E-03 | NM_008655                                                           |

|      |                             |                                                                                   |          |                                                                     |
|------|-----------------------------|-----------------------------------------------------------------------------------|----------|---------------------------------------------------------------------|
| 2160 | Ttk                         | Ttk protein kinase                                                                | 2.53E-03 | NM_001110265 /// NM_009445                                          |
| 2161 | Phf3                        | PHD finger protein 3                                                              | 2.53E-03 | NM_001081080                                                        |
| 2162 | Ifitm1                      | interferon induced transmembrane protein 1                                        | 2.53E-03 | NM_001112715 /// NM_026820                                          |
| 2163 | Enc1                        | ectodermal-neural cortex 1                                                        | 2.53E-03 | NM_007930                                                           |
| 2164 | Pppde2                      | PPPDE peptidase domain containing 2                                               | 2.53E-03 | NM_134095                                                           |
| 2165 | Bcl2l11                     | BCL2-like 11 (apoptosis facilitator)                                              | 2.54E-03 | NM_009754 /// NM_207680 /// NM_207681                               |
| 2166 | Dda1                        | DET1 and DDB1 associated 1                                                        | 2.54E-03 | NM_025600 /// XM_001476732 /// XM_912953                            |
| 2167 | Clec4n                      | C-type lectin domain family 4, member n                                           | 2.54E-03 | NM_020001                                                           |
| 2168 | Zfp758                      | zinc finger protein 758                                                           | 2.55E-03 | NM_145484                                                           |
| 2169 | Gm11517                     | predicted gene 11517                                                              | 2.55E-03 | XM_001475488 /// XM_001478289 /// XM_894675 /// XM_915795           |
| 2170 | Gosr1                       | golgi SNAP receptor complex member 1                                              | 2.55E-03 | NM_016810                                                           |
| 2171 | Selp                        | selectin, platelet                                                                | 2.56E-03 | NM_011347                                                           |
| 2172 | Pitrm1                      | pitrilysin metalloproteinase 1                                                    | 2.56E-03 | NM_145131                                                           |
| 2173 | Gm13072 /// Gm7828 /// Trmt | predicted gene 13072 /// predicted gene 7828 /// tRNA methyltransferase 11-2 hom  | 2.56E-03 | NM_001111273 /// NM_026306 /// XM_892701 /// XM_905419 /// XM_90581 |
| 2174 | Atp6v0a1                    | ATPase, H+ transporting, lysosomal V0 subunit A1                                  | 2.56E-03 | NM_016920                                                           |
| 2175 | 9130401M01RIK               | RIKEN cDNA 9130401M01 gene                                                        | 2.57E-03 | NM_029418                                                           |
| 2176 | Sdha                        | succinate dehydrogenase complex, subunit A, flavoprotein (Fp)                     | 2.57E-03 | NM_023281                                                           |
| 2177 | Adamts15                    | a disintegrin-like and metalloproteinase (reprolysin type) with thrombospondin ty | 2.57E-03 | NM_001024139                                                        |
| 2178 | Rps20                       | ribosomal protein S20                                                             | 2.58E-03 | NM_026147                                                           |
| 2179 | Pkig                        | protein kinase inhibitor, gamma                                                   | 2.58E-03 | NM_001039390 /// NM_001039391 /// NM_001164053 /// NM_001164055 /// |
| 2180 | Lmcd1                       | LIM and cysteine-rich domains 1                                                   | 2.59E-03 | NM_144799                                                           |
| 2181 | Cox5b                       | cytochrome c oxidase, subunit Vb                                                  | 2.59E-03 | NM_009942                                                           |
| 2182 | Comm1                       | COMM domain containing 1                                                          | 2.61E-03 | NM_144514                                                           |
| 2183 | Lgtn                        | ligatin                                                                           | 2.62E-03 | NM_001136070 /// NM_010709                                          |
| 2184 | Gpr124                      | G protein-coupled receptor 124                                                    | 2.63E-03 | NM_054044                                                           |
| 2185 | Cyp4v3                      | cytochrome P450, family 4, subfamily v, polypeptide 3                             | 2.64E-03 | NM_133969                                                           |
| 2186 | Ch1                         | cell adhesion molecule with homology to L1CAM                                     | 2.66E-03 | NM_007697                                                           |
| 2187 | Rps12                       | ribosomal protein S12                                                             | 2.66E-03 | NM_0111295                                                          |
| 2188 | Pkmyt1                      | protein kinase, membrane associated tyrosine/threonine 1                          | 2.67E-03 | NM_023058                                                           |
| 2189 | Myh14                       | myosin, heavy polypeptide 14                                                      | 2.68E-03 | NM_028021                                                           |
| 2190 | Rexo1                       | REX1, RNA exonuclease 1 homolog (S. cerevisiae)                                   | 2.68E-03 | NM_025852                                                           |
| 2191 | Foxk1                       | forkhead box K1                                                                   | 2.68E-03 | NM_199068                                                           |
| 2192 | Ttc39b                      | tetratricopeptide repeat domain 39B                                               | 2.69E-03 | NM_027238                                                           |
| 2193 | Meis2                       | Meis homeobox 2                                                                   | 2.70E-03 | NM_001136072 /// NM_001159567 /// NM_001159568 /// NM_001159569 /// |
| 2194 | Pja1                        | praja1, RING-H2 motif containing                                                  | 2.70E-03 | NM_001083110 /// NM_008853                                          |
| 2195 | Pebp1                       | phosphatidylethanolamine binding protein 1                                        | 2.70E-03 | NM_018858                                                           |
| 2196 | Synrg                       | synergyn, gamma                                                                   | 2.70E-03 | NM_001115009 /// NM_194341                                          |
| 2197 | Nedd1                       | neural precursor cell expressed, developmentally down-regulated gene 1            | 2.70E-03 | NM_008682                                                           |
| 2198 | Ndufa12                     | NADH dehydrogenase (ubiquinone) 1 alpha subcomplex, 12                            | 2.71E-03 | NM_025551                                                           |
| 2199 | Slc41a2                     | Solute carrier family 41, member 2                                                | 2.71E-03 | NM_177388                                                           |
| 2200 | Sema3c                      | sema domain, immunoglobulin domain (Ig), short basic domain, secreted, (semapho   | 2.71E-03 | NM_013657                                                           |
| 2201 | Cdx2                        | caudal type homeo box 2                                                           | 2.72E-03 | NM_007673                                                           |
| 2202 | Fzd6                        | frizzled homolog 6 (Drosophila)                                                   | 2.72E-03 | NM_001162494 /// NM_008056                                          |
| 2203 | Pigk                        | phosphatidylinositol glycan anchor biosynthesis, class K                          | 2.72E-03 | NM_025662 /// NM_178016                                             |
| 2204 | Snx5                        | sorting nexin 5                                                                   | 2.73E-03 | NM_024225                                                           |
| 2205 | B4galt6                     | UDP-Gal:betaGlcNAc beta 1,4-galactosyltransferase, polypeptide 6                  | 2.75E-03 | NM_019737                                                           |



|      |                                  |                                                                                  |          |                                                                     |
|------|----------------------------------|----------------------------------------------------------------------------------|----------|---------------------------------------------------------------------|
| 2206 | Men1                             | multiple endocrine neoplasia 1                                                   | 2.75E-03 | NM_008583                                                           |
| 2207 | Ufc1                             | ubiquitin-fold modifier conjugating enzyme 1                                     | 2.76E-03 | NM_025388                                                           |
| 2208 | Ets1                             | E26 avian leukemia oncogene 1, 5' domain                                         | 2.76E-03 | NM_001038642 /// NM_011808                                          |
| 2209 | Gch1                             | GTP cyclohydrolase 1                                                             | 2.76E-03 | NM_008102                                                           |
| 2210 | Insl6                            | insulin-like 6                                                                   | 2.77E-03 | NM_013754                                                           |
| 2211 | Dnpep                            | aspartyl aminopeptidase                                                          | 2.77E-03 | NM_001110831 /// NM_016878                                          |
| 2212 | Bcl6                             | B-cell leukemia/lymphoma 6                                                       | 2.77E-03 | NM_009744                                                           |
| 2213 | Osbpl9                           | Oxysterol binding protein-like 9                                                 | 2.77E-03 | NM_001134791 /// NM_133885 /// NM_173350                            |
| 2214 | Tmem19                           | transmembrane protein 19                                                         | 2.77E-03 | NM_133683                                                           |
| 2215 | Ccr5                             | chemokine (C-C motif) receptor 5                                                 | 2.78E-03 | NM_009917                                                           |
| 2216 | Nras                             | neuroblastoma ras oncogene                                                       | 2.78E-03 | NM_010937                                                           |
| 2217 | Nupr1                            | nuclear protein 1                                                                | 2.79E-03 | NM_019738                                                           |
| 2218 | Arhgdib                          | Rho, GDP dissociation inhibitor (GDI) beta                                       | 2.79E-03 | NM_007486                                                           |
| 2219 | Cln8                             | ceroid-lipofuscinosis, neuronal 8                                                | 2.79E-03 | NM_012000                                                           |
| 2220 | Slc15a3                          | solute carrier family 15, member 3                                               | 2.79E-03 | NM_023044                                                           |
| 2221 | Trim46                           | tripartite motif-containing 46                                                   | 2.80E-03 | NM_001039466 /// NM_183037                                          |
| 2222 | Ywhab                            | tyrosine 3-monooxygenase/tryptophan 5-monooxygenase activation protein, beta p   | 2.80E-03 | NM_018753                                                           |
| 2223 | Csnk1e                           | casein kinase 1, epsilon                                                         | 2.80E-03 | NM_013767                                                           |
| 2224 | Acta2                            | actin, alpha 2, smooth muscle, aorta                                             | 2.81E-03 | NM_007392                                                           |
| 2225 | Panx1                            | pannexin 1                                                                       | 2.81E-03 | NM_019482                                                           |
| 2226 | Lsm7                             | LSM7 homolog, U6 small nuclear RNA associated (S. cerevisiae)                    | 2.81E-03 | NM_025349                                                           |
| 2227 | Gm2785 /// Ifi203 /// Ifi204 /// | predicted gene 2785 /// interferon activated gene 203 /// interferon activated g | 2.83E-03 | NM_001033450 /// NM_001045481 /// NM_008328 /// NM_008329 /// NM_17 |
| 2228 | Igk-V28                          | immunoglobulin kappa chain variable 28 (V28)                                     | 2.84E-03 | ---                                                                 |
| 2229 | Mtdh                             | metadherin                                                                       | 2.85E-03 | NM_026002                                                           |
| 2230 | BC004728                         | cDNA sequence BC004728                                                           | 2.85E-03 | NM_001033872 /// NM_174992                                          |
| 2231 | Fpr2                             | formyl peptide receptor 2                                                        | 2.85E-03 | NM_008039                                                           |
| 2232 | Sash3                            | SAM and SH3 domain containing 3                                                  | 2.85E-03 | NM_028773                                                           |
| 2233 | Ptpn21                           | protein tyrosine phosphatase, non-receptor type 21                               | 2.85E-03 | NM_001146199 /// NM_011877                                          |
| 2234 | Tex9                             | testis expressed gene 9                                                          | 2.85E-03 | NM_009359                                                           |
| 2235 | Kif16b                           | kinesin family member 16B                                                        | 2.86E-03 | NM_001081133                                                        |
| 2236 | Gabarapl1                        | gamma-aminobutyric acid (GABA) A receptor-associated protein-like 1              | 2.86E-03 | NM_020590                                                           |
| 2237 | Lmb1                             | lamin B1                                                                         | 2.86E-03 | NM_010721                                                           |
| 2238 | Ltbp1                            | latent transforming growth factor beta binding protein 1                         | 2.87E-03 | NM_019919 /// NM_206958                                             |
| 2239 | Aplp2                            | amyloid beta (A4) precursor-like protein 2                                       | 2.87E-03 | NM_001102455 /// NM_001102456 /// NM_009691                         |
| 2240 | Gpr137b /// LOC100044979         | G protein-coupled receptor 137B /// similar to Gpr137b protein                   | 2.87E-03 | NM_031999 /// XM_001473441                                          |
| 2241 | Hdgf                             | hepatoma-derived growth factor                                                   | 2.87E-03 | NM_008231                                                           |
| 2242 | Mtap4                            | microtubule-associated protein 4                                                 | 2.88E-03 | NM_008633                                                           |
| 2243 | Cab39                            | calcium binding protein 39                                                       | 2.88E-03 | NM_133781                                                           |
| 2244 | LOC100046421 /// Tmem222         | similar to D4Ertd196e protein /// transmembrane protein 222                      | 2.88E-03 | NM_025667 /// XM_001476180                                          |
| 2245 | Hells                            | helicase, lymphoid specific                                                      | 2.88E-03 | NM_008234                                                           |
| 2246 | Dcaf11                           | DDB1 and CUL4 associated factor 11                                               | 2.89E-03 | NM_133734                                                           |
| 2247 | Atp6v1c1                         | ATPase, H+ transporting, lysosomal V1 subunit C1                                 | 2.90E-03 | NM_025494                                                           |
| 2248 | Gatsl2                           | GATS protein-like 2                                                              | 2.90E-03 | NM_030719                                                           |
| 2249 | Samd10                           | sterile alpha motif domain containing 10                                         | 2.90E-03 | NM_172676                                                           |
| 2250 | Ccdc109b                         | coiled-coil domain containing 109B                                               | 2.91E-03 | NM_025779                                                           |
| 2251 | Aspscr1                          | alveolar soft part sarcoma chromosome region, candidate 1 (human)                | 2.91E-03 | NM_001164224 /// NM_026877 /// NM_198223                            |

|      |                    |                                                                                  |          |                                                                     |
|------|--------------------|----------------------------------------------------------------------------------|----------|---------------------------------------------------------------------|
| 2252 | Tnk2               | tyrosine kinase, non-receptor, 2                                                 | 2.91E-03 | NM_001110147 /// NM_016788                                          |
| 2253 | Stl7l              | suppression of tumorigenicity 7-like                                             | 2.91E-03 | NM_153091                                                           |
| 2254 | Rab11fip5          | RAB11 family interacting protein 5 (class I)                                     | 2.92E-03 | NM_001003955 /// NM_177466                                          |
| 2255 | Rnf113a1           | ring finger protein 113A1                                                        | 2.92E-03 | NM_153503                                                           |
| 2256 | Alg2               | asparagine-linked glycosylation 2 homolog (yeast, alpha-1,3-mannosyltransferase) | 2.92E-03 | NM_019998                                                           |
| 2257 | Pcolce2            | procollagen C-endopeptidase enhancer 2                                           | 2.92E-03 | NM_029620                                                           |
| 2258 | Gm4204 /// Nap111  | predicted gene 4204 /// nucleosome assembly protein 1-like 1                     | 2.92E-03 | NM_001146707 /// NM_015781 /// XR_034434                            |
| 2259 | Aig1               | androgen-induced 1                                                               | 2.92E-03 | NM_025446                                                           |
| 2260 | Irak1              | interleukin-1 receptor-associated kinase 1                                       | 2.93E-03 | NM_008363                                                           |
| 2261 | Lipa               | lysosomal acid lipase A                                                          | 2.93E-03 | NM_001111100 /// NM_021460                                          |
| 2262 | Dynll1 /// Gm6788  | dynein light chain LC8-type 1 /// predicted gene 6788                            | 2.94E-03 | NM_019682 /// XM_892488 /// XM_913631                               |
| 2263 | Gm6563 /// Sarnp   | SAP domain containing ribonucleoprotein pseudogene /// SAP domain containing rib | 2.94E-03 | NM_025364 /// XM_001478220 /// XM_001479601 /// XM_899946 /// XM_92 |
| 2264 | Lrpap1             | low density lipoprotein receptor-related protein associated protein 1            | 2.95E-03 | NM_013587                                                           |
| 2265 | Rbm8a              | RNA binding motif protein 8a                                                     | 2.95E-03 | NM_001102407 /// NM_025875                                          |
| 2266 | Capn7              | calpain 7                                                                        | 2.96E-03 | NM_009796                                                           |
| 2267 | Dbp                | D site albumin promoter binding protein                                          | 2.96E-03 | NM_016974                                                           |
| 2268 | Gdpd2              | glycerophosphodiester phosphodiesterase domain containing 2                      | 2.97E-03 | NM_023608                                                           |
| 2269 | Ckap4              | cytoskeleton-associated protein 4                                                | 2.97E-03 | NM_175451                                                           |
| 2270 | Mapksp1            | MAPK scaffold protein 1                                                          | 2.97E-03 | NM_019920                                                           |
| 2271 | Dync1l2            | dynein cytoplasmic 1 intermediate chain 2                                        | 2.97E-03 | NM_010064                                                           |
| 2272 | Hspa1a             | heat shock protein 1A                                                            | 2.97E-03 | NM_010479                                                           |
| 2273 | Mrps23             | mitochondrial ribosomal protein S23                                              | 2.97E-03 | NM_024174                                                           |
| 2274 | Chrnd              | cholinergic receptor, nicotinic, delta polypeptide                               | 2.97E-03 | NM_021600                                                           |
| 2275 | Ier5               | immediate early response 5                                                       | 2.97E-03 | NM_010500                                                           |
| 2276 | Ube2b              | ubiquitin-conjugating enzyme E2B, RAD6 homology (S. cerevisiae)                  | 2.98E-03 | NM_009458                                                           |
| 2277 | Fam136a            | family with sequence similarity 136, member A                                    | 2.99E-03 | NM_025591                                                           |
| 2278 | Ubap2l             | ubiquitin associated protein 2-like                                              | 2.99E-03 | NM_028475 /// NM_153489                                             |
| 2279 | Sell               | selectin, lymphocyte                                                             | 3.00E-03 | NM_001164059 /// NM_011346                                          |
| 2280 | 3110003A17Rik      | RIKEN cDNA 3110003A17 gene                                                       | 3.00E-03 | NM_028440 /// XM_001473245 /// XM_912949                            |
| 2281 | Gne                | glucosamine                                                                      | 3.01E-03 | NM_015828                                                           |
| 2282 | Rab11b             | RAB11B, member RAS oncogene family                                               | 3.01E-03 | NM_008997                                                           |
| 2283 | Fam3c              | family with sequence similarity 3, member C                                      | 3.01E-03 | NM_138587                                                           |
| 2284 | Fbxl14             | F-box and leucine-rich repeat protein 14                                         | 3.02E-03 | NM_133940                                                           |
| 2285 | Cbx3 /// LOC633016 | chromobox homolog 3 (Drosophila HP1 gamma) /// similar to chromobox homolog 3    | 3.02E-03 | NM_007624 /// XM_921371                                             |
| 2286 | Nkain4             | Na <sup>+</sup> /K <sup>+</sup> transporting ATPase interacting 4                | 3.02E-03 | NM_001141933 /// NM_021426                                          |
| 2287 | Per3               | period homolog 3 (Drosophila)                                                    | 3.02E-03 | NM_011067                                                           |
| 2288 | ---                | ---                                                                              | 3.03E-03 | ---                                                                 |
| 2289 | Fcer1g             | Fc receptor, IgE, high affinity I, gamma polypeptide                             | 3.03E-03 | NM_010185                                                           |
| 2290 | Fpgs               | folylpolyglutamyl synthetase                                                     | 3.03E-03 | NM_010236                                                           |
| 2291 | Idh1               | isocitrate dehydrogenase 1 (NADP+), soluble                                      | 3.03E-03 | NM_001111320 /// NM_010497                                          |
| 2292 | Emr4               | EGF-like module containing, mucin-like, hormone receptor-like sequence 4         | 3.03E-03 | NM_139138                                                           |
| 2293 | Ipk6k1             | inositol hexaphosphate kinase 1                                                  | 3.04E-03 | NM_013785                                                           |
| 2294 | Ece2               | endothelin converting enzyme 2                                                   | 3.04E-03 | NM_025462 /// NM_139293 /// NM_177940 /// NM_177941 /// NM_177942   |
| 2295 | Shmt1              | serine hydroxymethyltransferase 1 (soluble)                                      | 3.04E-03 | NM_009171                                                           |
| 2296 | Sema4a             | sema domain, immunoglobulin domain (Ig), transmembrane domain (TM) and short     | 3.05E-03 | NM_001163489 /// NM_001163490 /// NM_001163491 /// NM_013658        |
| 2297 | Pip5k1b            | phosphatidylinositol-4-phosphate 5-kinase, type 1 beta                           | 3.06E-03 | NM_008846                                                           |

|      |                     |                                                                                   |          |                                                                     |
|------|---------------------|-----------------------------------------------------------------------------------|----------|---------------------------------------------------------------------|
| 2298 | Ube4a               | ubiquitination factor E4A, UFD2 homolog ( <i>S. cerevisiae</i> )                  | 3.06E-03 | NM_145400                                                           |
| 2299 | Fbxo36              | F-box protein 36                                                                  | 3.08E-03 | NM_025386                                                           |
| 2300 | Chst14              | carbohydrate (N-acetylgalactosamine 4-O) sulfotransferase 14                      | 3.09E-03 | NM_028117                                                           |
| 2301 | Tal2                | T-cell acute lymphocytic leukemia 2                                               | 3.09E-03 | NM_009317                                                           |
| 2302 | Ralbp1              | ralA binding protein 1                                                            | 3.09E-03 | NM_009067                                                           |
| 2303 | Rarres2             | retinoic acid receptor responder (tazarotene induced) 2                           | 3.09E-03 | NM_027852                                                           |
| 2304 | Csnk2a1 /// Gm10031 | casein kinase 2, alpha 1 polypeptide /// predicted gene 10031                     | 3.10E-03 | NM_007788 /// XM_001472047                                          |
| 2305 | Xpr1                | xenotropic and polytropic retrovirus receptor 1                                   | 3.11E-03 | NM_011273                                                           |
| 2306 | Fam63a              | family with sequence similarity 63, member A                                      | 3.12E-03 | NM_133858                                                           |
| 2307 | Oas2                | 2'-5' oligoadenylate synthetase 2                                                 | 3.13E-03 | NM_145227                                                           |
| 2308 | Ctsa                | cathepsin A                                                                       | 3.13E-03 | NM_001038492 /// NM_008906                                          |
| 2309 | Rassf1              | Ras association (RalGDS/AF-6) domain family member 1                              | 3.14E-03 | NM_019713                                                           |
| 2310 | Usp19               | ubiquitin specific peptidase 19                                                   | 3.14E-03 | NM_027804                                                           |
| 2311 | S100a10             | S100 calcium binding protein A10 (calpactin)                                      | 3.14E-03 | NM_009112                                                           |
| 2312 | ---                 | ---                                                                               | 3.14E-03 | ---                                                                 |
| 2313 | Dhx30               | DEAH (Asp-Glu-Ala-His) box polypeptide 30                                         | 3.14E-03 | NM_133347                                                           |
| 2314 | Prdx4               | peroxiredoxin 4                                                                   | 3.15E-03 | NM_016764                                                           |
| 2315 | Ak3                 | adenylate kinase 3                                                                | 3.15E-03 | NM_021299                                                           |
| 2316 | Acp2                | acid phosphatase 2, lysosomal                                                     | 3.15E-03 | NM_007387                                                           |
| 2317 | Sfrs7               | splicing factor, arginine/serine-rich 7                                           | 3.15E-03 | NM_146083                                                           |
| 2318 | Clic4               | chloride intracellular channel 4 (mitochondrial)                                  | 3.16E-03 | NM_013885                                                           |
| 2319 | Pcbp2               | poly(rC) binding protein 2                                                        | 3.18E-03 | NM_001103165 /// NM_001103166 /// NM_011042                         |
| 2320 | Psat1               | phosphoserine aminotransferase 1                                                  | 3.19E-03 | NM_177420                                                           |
| 2321 | Lyst                | lysosomal trafficking regulator                                                   | 3.19E-03 | NM_010748                                                           |
| 2322 | Atp5e               | ATP synthase, H+ transporting, mitochondrial F1 complex, epsilon subunit          | 3.19E-03 | NM_025983                                                           |
| 2323 | Slc7a3              | solute carrier family 7 (cationic amino acid transporter, y+ system), member 3    | 3.19E-03 | NM_007515                                                           |
| 2324 | Pcnx                | pecanex homolog ( <i>Drosophila</i> )                                             | 3.19E-03 | NM_018814                                                           |
| 2325 | BC017647            | cDNA sequence BC017647                                                            | 3.20E-03 | NM_145430                                                           |
| 2326 | Tgfb1               | transforming growth factor, beta induced                                          | 3.21E-03 | NM_009369                                                           |
| 2327 | Galnt7              | UDP-N-acetyl-alpha-D-galactosamine: polypeptide N-acetylgalactosaminyltransferase | 3.21E-03 | NM_144731                                                           |
| 2328 | Capzb               | capping protein (actin filament) muscle Z-line, beta                              | 3.21E-03 | NM_001037761 /// NM_009798                                          |
| 2329 | Scamp3              | secretory carrier membrane protein 3                                              | 3.21E-03 | NM_011886                                                           |
| 2330 | Zfp521              | zinc finger protein 521                                                           | 3.22E-03 | NM_145492 /// NM_181326                                             |
| 2331 | Alox12              | arachidonate 12-lipoxygenase                                                      | 3.22E-03 | NM_007440                                                           |
| 2332 | Ralgps2             | Ral GEF with PH domain and SH3 binding motif 2                                    | 3.22E-03 | NM_001159965 /// NM_001159966 /// NM_001159967 /// NM_001159968 /// |
| 2333 | Ulk2                | Unc-51 like kinase 2 ( <i>C. elegans</i> )                                        | 3.22E-03 | NM_013881                                                           |
| 2334 | Dlymk               | deoxythymidylate kinase                                                           | 3.22E-03 | NM_001105667 /// NM_023136                                          |
| 2335 | Mat2a               | methionine adenosyltransferase II, alpha                                          | 3.23E-03 | NM_145569                                                           |
| 2336 | Cdc42se2            | CDC42 small effector 2                                                            | 3.23E-03 | NM_178626                                                           |
| 2337 | Vps41               | vacuolar protein sorting 41 (yeast)                                               | 3.23E-03 | NM_172120                                                           |
| 2338 | C1qtnf4             | C1q and tumor necrosis factor related protein 4                                   | 3.23E-03 | NM_026161                                                           |
| 2339 | Ube2v1              | ubiquitin-conjugating enzyme E2 variant 1                                         | 3.24E-03 | NM_023230                                                           |
| 2340 | Ppp4r2              | protein phosphatase 4, regulatory subunit 2                                       | 3.25E-03 | NM_182939                                                           |
| 2341 | Phlda3              | pleckstrin homology-like domain, family A, member 3                               | 3.27E-03 | NM_013750                                                           |
| 2342 | Fbxo22              | F-box protein 22                                                                  | 3.27E-03 | NM_028049                                                           |
| 2343 | Lyve1               | lymphatic vessel endothelial hyaluronan receptor 1                                | 3.27E-03 | NM_053247                                                           |

|      |          |                                                                                  |          |                                             |
|------|----------|----------------------------------------------------------------------------------|----------|---------------------------------------------|
| 2344 | Bhlha15  | basic helix-loop-helix family, member a15                                        | 3.28E-03 | NM_010800                                   |
| 2345 | Clec7a   | C-type lectin domain family 7, member a                                          | 3.29E-03 | NM_020008                                   |
| 2346 | Tcl1b3   | T-cell leukemia/lymphoma 1B, 3                                                   | 3.29E-03 | NM_013772                                   |
| 2347 | Arhgef10 | Rho guanine nucleotide exchange factor (GEF) 10                                  | 3.29E-03 | NM_001037736 /// NM_172751                  |
| 2348 | Ncor1    | nuclear receptor co-repressor 1                                                  | 3.30E-03 | NM_011308                                   |
| 2349 | Tle1     | transducin-like enhancer of split 1, homolog of Drosophila E(spl)                | 3.30E-03 | NM_011599                                   |
| 2350 | Cplx1    | complexin 1                                                                      | 3.32E-03 | NM_007756                                   |
| 2351 | Wee1     | WEE 1 homolog 1 (S. pombe)                                                       | 3.32E-03 | NM_009516                                   |
| 2352 | Gstm1    | glutathione S-transferase, mu 1                                                  | 3.33E-03 | NM_010358                                   |
| 2353 | Adcy4    | adenylate cyclase 4                                                              | 3.33E-03 | NM_080435                                   |
| 2354 | Plxnd1   | plexin D1                                                                        | 3.35E-03 | NM_026376                                   |
| 2355 | Elov11   | elongation of very long chain fatty acids (FEN1/Elo2, SUR4/Elo3, yeast)-like 1   | 3.35E-03 | NM_001039175 /// NM_001039176 /// NM_019422 |
| 2356 | Dmkn     | dermokine                                                                        | 3.36E-03 | NM_028618 /// NM_172899                     |
| 2357 | Calr     | calreticulin                                                                     | 3.36E-03 | NM_007591                                   |
| 2358 | Pla2g5   | phospholipase A2, group V                                                        | 3.36E-03 | NM_001122954 /// NM_011110                  |
| 2359 | Mapk12   | mitogen-activated protein kinase 12                                              | 3.36E-03 | NM_013871                                   |
| 2360 | Elf4b    | eukaryotic translation initiation factor 4B                                      | 3.37E-03 | NM_145625                                   |
| 2361 | Pdap1    | PDGFA associated protein 1                                                       | 3.38E-03 | NM_001033313                                |
| 2362 | Slc11a1  | solute carrier family 11 (proton-coupled divalent metal ion transporters), membe | 3.38E-03 | NM_013612                                   |
| 2363 | Anp32b   | acidic (leucine-rich) nuclear phosphoprotein 32 family, member B                 | 3.38E-03 | NM_130889                                   |
| 2364 | Atxn7    | ataxin 7                                                                         | 3.38E-03 | NM_139227                                   |
| 2365 | Slc48a1  | solute carrier family 48 (heme transporter), member 1                            | 3.38E-03 | NM_026353                                   |
| 2366 | Il17d    | Interleukin 17D                                                                  | 3.39E-03 | NM_145837                                   |
| 2367 | Trpt1    | tRNA phosphotransferase 1                                                        | 3.39E-03 | NM_153597 /// NR_027351                     |
| 2368 | Rhob     | ras homolog gene family, member B                                                | 3.40E-03 | NM_007483                                   |
| 2369 | Irf1     | interferon regulatory factor 1                                                   | 3.40E-03 | NM_001159393 /// NM_001159396 /// NM_008390 |
| 2370 | Ngef     | neuronal guanine nucleotide exchange factor                                      | 3.41E-03 | NM_001111314 /// NM_019867                  |
| 2371 | Parp1    | poly (ADP-ribose) polymerase family, member 1                                    | 3.41E-03 | NM_007415                                   |
| 2372 | Fus      | fusion, derived from t(12;16) malignant liposarcoma (human)                      | 3.42E-03 | NM_139149                                   |
| 2373 | Gata6    | GATA binding protein 6                                                           | 3.42E-03 | NM_010258                                   |
| 2374 | Tmem85   | transmembrane protein 85                                                         | 3.42E-03 | NM_026519                                   |
| 2375 | Mat2a    | methionine adenosyltransferase II, alpha                                         | 3.42E-03 | NM_145569                                   |
| 2376 | Gnptab   | N-acetylglucosamine-1-phosphate transferase, alpha and beta subunits             | 3.44E-03 | NM_001004164                                |
| 2377 | Rev1     | REV1 homolog (S. cerevisiae)                                                     | 3.45E-03 | NM_019570                                   |
| 2378 | Zcchc8   | zinc finger, CCHC domain containing 8                                            | 3.45E-03 | NM_027494                                   |
| 2379 | Rab11a   | RAB11a, member RAS oncogene family                                               | 3.45E-03 | NM_017382                                   |
| 2380 | Dhcr7    | 7-dehydrocholesterol reductase                                                   | 3.45E-03 | NM_007856                                   |
| 2381 | Ccnb2    | cyclin B2                                                                        | 3.45E-03 | NM_007630                                   |
| 2382 | Tspan14  | tetraspanin 14                                                                   | 3.46E-03 | NM_145928                                   |
| 2383 | Padi3    | peptidyl arginine deiminase, type III                                            | 3.46E-03 | NM_011060                                   |
| 2384 | Cmtm6    | CKLF-like MARVEL transmembrane domain containing 6                               | 3.47E-03 | NM_026036                                   |
| 2385 | Fbln1    | fibulin 1                                                                        | 3.47E-03 | NM_010180                                   |
| 2386 | Nedd9    | neural precursor cell expressed, developmentally down-regulated gene 9           | 3.47E-03 | NM_001111324 /// NM_017464                  |
| 2387 | Sh3bgrl3 | SH3 domain binding glutamic acid-rich protein-like 3                             | 3.49E-03 | NM_080559                                   |
| 2388 | Tshr     | thyroid stimulating hormone receptor                                             | 3.49E-03 | NM_001113404 /// NM_011648                  |
| 2389 | Hnrnpul2 | heterogeneous nuclear ribonucleoprotein U-like 2                                 | 3.49E-03 | NM_001081196 /// XM_001477687               |

|      |                         |                                                                        |          |                                                                      |
|------|-------------------------|------------------------------------------------------------------------|----------|----------------------------------------------------------------------|
| 2390 | Pqlc2                   | PQ loop repeat containing 2                                            | 3.49E-03 | NM_145384                                                            |
| 2391 | Ipo5                    | importin 5                                                             | 3.49E-03 | NM_023579                                                            |
| 2392 | Mmp12                   | matrix metalloproteinase 12                                            | 3.50E-03 | NM_008605                                                            |
| 2393 | Cdsn                    | cornedoesmosin                                                         | 3.50E-03 | NM_001008424 /// XM_001471477                                        |
| 2394 | Lrrc51                  | leucine rich repeat containing 51                                      | 3.50E-03 | NM_001162973 /// NM_001162974 /// NM_027053 /// XM_890234 /// XM_900 |
| 2395 | D16Ert472e              | DNA segment, Chr 16, ERATO Doi 472, expressed                          | 3.52E-03 | NM_025967 /// XM_001473183                                           |
| 2396 | Zfp148                  | zinc finger protein 148                                                | 3.52E-03 | NM_011749                                                            |
| 2397 | Gm2666 /// Gm7609       | predicted gene 2666 /// predicted gene 7609                            | 3.53E-03 | NM_001081746 /// XM_001474231 /// XM_001474245                       |
| 2398 | Ociad1                  | OCIA domain containing 1                                               | 3.53E-03 | NM_001159887 /// NM_001159888 /// NM_001159889 /// NM_023429         |
| 2399 | Evl /// LOC100047333    | Ena-vasodilator stimulated phosphoprotein /// similar to Ena-VASP-like | 3.54E-03 | NM_001163394 /// NM_001163395 /// NM_001163396 /// NM_007965 /// XM  |
| 2400 | Glb1                    | galactosidase, beta 1                                                  | 3.55E-03 | NM_009752                                                            |
| 2401 | Baiap211                | BAI1-associated protein 2-like 1                                       | 3.55E-03 | NM_025833                                                            |
| 2402 | Flna                    | filamin, alpha                                                         | 3.56E-03 | NM_010227                                                            |
| 2403 | Aebp2                   | AE binding protein 2                                                   | 3.56E-03 | NM_001005605 /// NM_009637 /// NM_178803                             |
| 2404 | Atp2a3                  | ATPase, Ca++ transporting, ubiquitous                                  | 3.57E-03 | NM_001163336 /// NM_001163337 /// NM_016745                          |
| 2405 | Prpsap2                 | phosphoribosyl pyrophosphate synthetase-associated protein 2           | 3.58E-03 | NM_001164242 /// NM_001164243 /// NM_001164244 /// NM_144806         |
| 2406 | Pim3                    | proviral integration site 3                                            | 3.59E-03 | NM_145478                                                            |
| 2407 | LOC100045963 /// Rnf126 | similar to Ring finger protein 126 /// ring finger protein 126         | 3.61E-03 | NM_144528 /// NR_027505 /// XM_001475257                             |
| 2408 | Btg2                    | B-cell translocation gene 2, anti-proliferative                        | 3.62E-03 | NM_007570                                                            |
| 2409 | Abcf3                   | ATP-binding cassette, sub-family F (GCN20), member 3                   | 3.62E-03 | NM_013852                                                            |
| 2410 | Tbx6                    | T-box 6                                                                | 3.63E-03 | NM_011538                                                            |
| 2411 | Tmx1                    | thioredoxin-related transmembrane protein 1                            | 3.63E-03 | NM_028339                                                            |
| 2412 | Dnajc2                  | DnaJ (Hsp40) homolog, subfamily C, member 2                            | 3.64E-03 | NM_009584                                                            |
| 2413 | Rnf121                  | ring finger protein 121                                                | 3.64E-03 | NM_029211                                                            |
| 2414 | Grn                     | granulin                                                               | 3.65E-03 | NM_008175                                                            |
| 2415 | Cd300a                  | CD300A antigen                                                         | 3.65E-03 | NM_170758                                                            |
| 2416 | A130022J15Rik           | RIKEN cDNA A130022J15 gene                                             | 3.66E-03 | NM_175313                                                            |
| 2417 | LOC100046704 /// Nras   | similar to neuroblastoma ras oncogene /// neuroblastoma ras oncogene   | 3.66E-03 | NM_010937 /// XM_001476989                                           |
| 2418 | 5033411D12Rik           | RIKEN cDNA 5033411D12 gene                                             | 3.66E-03 | NM_138654                                                            |
| 2419 | Cyp2b10                 | cytochrome P450, family 2, subfamily b, polypeptide 10                 | 3.66E-03 | NM_009998 /// NM_009999                                              |
| 2420 | Pltp                    | phospholipid transfer protein                                          | 3.66E-03 | NM_011125                                                            |
| 2421 | Tmem150                 | transmembrane protein 150                                              | 3.67E-03 | NM_144916                                                            |
| 2422 | Igh-VJ558               | immunoglobulin heavy chain (J558 family)                               | 3.67E-03 | ---                                                                  |
| 2423 | ---                     | ---                                                                    | 3.68E-03 | ---                                                                  |
| 2424 | Tpp1                    | tripeptidyl peptidase I                                                | 3.68E-03 | NM_009906                                                            |
| 2425 | Foxh1                   | forkhead box H1                                                        | 3.69E-03 | NM_007989                                                            |
| 2426 | Pacsin1                 | protein kinase C and casein kinase substrate in neurons 1              | 3.69E-03 | NM_011861 /// NM_178365                                              |
| 2427 | Tmem9b                  | TMEM9 domain family, member B                                          | 3.70E-03 | NM_020050                                                            |
| 2428 | Enpp3                   | ectonucleotide pyrophosphatase/phosphodiesterase 3                     | 3.71E-03 | NM_134005                                                            |
| 2429 | Lasp1                   | LIM and SH3 protein 1                                                  | 3.71E-03 | NM_010688                                                            |
| 2430 | Evi2b                   | ecotropic viral integration site 2b                                    | 3.71E-03 | NM_001077496 /// NM_146023                                           |
| 2431 | Atf1                    | activating transcription factor 1                                      | 3.71E-03 | NM_007497                                                            |
| 2432 | Scd2                    | stearoyl-Coenzyme A desaturase 2                                       | 3.72E-03 | NM_009128                                                            |
| 2433 | Tcfap4                  | transcription factor AP4                                               | 3.72E-03 | NM_031182                                                            |
| 2434 | Rcc1                    | regulator of chromosome condensation 1                                 | 3.72E-03 | NM_133878                                                            |
| 2435 | 201011101Rik            | RIKEN cDNA 201011101 gene                                              | 3.72E-03 | NM_028079                                                            |

|      |                             |                                                                                     |          |                                                                     |
|------|-----------------------------|-------------------------------------------------------------------------------------|----------|---------------------------------------------------------------------|
| 2436 | Becn1                       | beclin 1, autophagy related                                                         | 3.72E-03 | NM_019584                                                           |
| 2437 | Fam125b                     | family with sequence similarity 125, member B                                       | 3.73E-03 | NM_175184                                                           |
| 2438 | ---                         | ---                                                                                 | 3.73E-03 | ---                                                                 |
| 2439 | Abcc10                      | ATP-binding cassette, sub-family C (CFTR/MRP), member 10                            | 3.73E-03 | NM_145140 /// NM_170680                                             |
| 2440 | Fkbp3                       | FK506 binding protein 3                                                             | 3.73E-03 | NM_013902                                                           |
| 2441 | Plvap                       | plasmalemma vesicle associated protein                                              | 3.74E-03 | NM_032398                                                           |
| 2442 | Shroom3                     | shroom family member 3                                                              | 3.74E-03 | NM_001077595 /// NM_001077596 /// NM_015756                         |
| 2443 | Cbx3 /// LOC633016          | chromobox homolog 3 (Drosophila HP1 gamma) /// similar to chromobox homolog 3       | 3.74E-03 | NM_007624 /// XM_921371                                             |
| 2444 | Rcbbt2                      | regulator of chromosome condensation (RCC1) and BTB (POZ) domain containing protein | 3.74E-03 | NM_134083                                                           |
| 2445 | Cyp39a1                     | cytochrome P450, family 39, subfamily a, polypeptide 1                              | 3.75E-03 | NM_018887                                                           |
| 2446 | Inpp5k                      | inositol polyphosphate 5-phosphatase K                                              | 3.75E-03 | NM_008916                                                           |
| 2447 | Itga9                       | integrin alpha 9                                                                    | 3.76E-03 | NM_001113514 /// NM_133721                                          |
| 2448 | Senp2                       | SUMO/sentrin specific peptidase 2                                                   | 3.77E-03 | NM_029457 /// NR_027488                                             |
| 2449 | Nupr1                       | nuclear protein 1                                                                   | 3.80E-03 | NM_019738                                                           |
| 2450 | Pde10a                      | phosphodiesterase 10A                                                               | 3.80E-03 | NM_011866                                                           |
| 2451 | LOC637202 /// LOC637224 /// | similar to putative pheromone receptor (Go-VN5) /// similar to putative pheromon    | 3.80E-03 | NM_001102581 /// NM_001104547 /// NM_001104549 /// NM_001104550 /// |
| 2452 | Ero1lb                      | ERO1-like beta (S. cerevisiae)                                                      | 3.80E-03 | NM_026184                                                           |
| 2453 | 2510009E07Rik               | RIKEN cDNA 2510009E07 gene                                                          | 3.80E-03 | NM_001001881                                                        |
| 2454 | Fastkd2                     | FAST kinase domains 2                                                               | 3.81E-03 | NM_172422                                                           |
| 2455 | Scamp2                      | secretory carrier membrane protein 2                                                | 3.81E-03 | NM_022813                                                           |
| 2456 | Csrp1                       | cysteine and glycine-rich protein 1                                                 | 3.81E-03 | NM_007791                                                           |
| 2457 | AI428936                    | expressed sequence AI428936                                                         | 3.82E-03 | NM_153577                                                           |
| 2458 | Ap1m1                       | adaptor-related protein complex AP-1, mu subunit 1                                  | 3.83E-03 | NM_007456                                                           |
| 2459 | Runx1t1                     | runx-related transcription factor 1; translocated to, 1 (cyclin D-related)          | 3.83E-03 | NM_001111026 /// NM_001111027 /// NM_009822                         |
| 2460 | Tubgcp4                     | tubulin, gamma complex associated protein 4                                         | 3.84E-03 | NM_153387                                                           |
| 2461 | Pitpnc1                     | phosphatidylinositol transfer protein, cytoplasmic 1                                | 3.84E-03 | NM_145823                                                           |
| 2462 | Lasp1                       | LIM and SH3 protein 1                                                               | 3.85E-03 | NM_010688                                                           |
| 2463 | Stt3b                       | STT3, subunit of the oligosaccharyltransferase complex, homolog B (S. cerevisiae)   | 3.85E-03 | NM_024222                                                           |
| 2464 | Chic2                       | cysteine-rich hydrophobic domain 2                                                  | 3.85E-03 | NM_028850                                                           |
| 2465 | Pitpna                      | phosphatidylinositol transfer protein, alpha                                        | 3.85E-03 | NM_008850                                                           |
| 2466 | Herpud1                     | homocysteine-inducible, endoplasmic reticulum stress-inducible, ubiquitin-like d    | 3.86E-03 | NM_022331                                                           |
| 2467 | Il12rb2                     | interleukin 12 receptor, beta 2                                                     | 3.86E-03 | NM_008354                                                           |
| 2468 | Pak2                        | p21 protein (Cdc42/Rac)-activated kinase 2                                          | 3.86E-03 | NM_177326                                                           |
| 2469 | ---                         | ---                                                                                 | 3.86E-03 | ---                                                                 |
| 2470 | Prkab1                      | protein kinase, AMP-activated, beta 1 non-catalytic subunit                         | 3.87E-03 | NM_031869                                                           |
| 2471 | Dgka                        | diacylglycerol kinase, alpha                                                        | 3.88E-03 | NM_016811 /// XM_001475744 /// XM_001480976                         |
| 2472 | Scpep1                      | serine carboxypeptidase 1                                                           | 3.88E-03 | NM_029023                                                           |
| 2473 | Traf6                       | TNF receptor-associated factor 6                                                    | 3.89E-03 | NM_009424 /// XM_001479093 /// XM_001479837                         |
| 2474 | Cyb5r3                      | cytochrome b5 reductase 3                                                           | 3.90E-03 | NM_029787                                                           |
| 2475 | Reep5                       | receptor accessory protein 5                                                        | 3.90E-03 | NM_007874                                                           |
| 2476 | Mrps5                       | mitochondrial ribosomal protein S5                                                  | 3.90E-03 | NM_029963                                                           |
| 2477 | Rnf138                      | ring finger protein 138                                                             | 3.91E-03 | NM_019706 /// NM_207623                                             |
| 2478 | Tgm2                        | transglutaminase 2, C polypeptide                                                   | 3.91E-03 | NM_009373                                                           |
| 2479 | Pygo2                       | pygopus 2                                                                           | 3.91E-03 | NM_026869                                                           |
| 2480 | Kifap3                      | kinesin-associated protein 3                                                        | 3.92E-03 | NM_010629                                                           |
| 2481 | Slc14a1                     | solute carrier family 14 (urea transporter), member 1                               | 3.92E-03 | NM_028122                                                           |

|      |                                 |                                                                                  |          |                                                                      |
|------|---------------------------------|----------------------------------------------------------------------------------|----------|----------------------------------------------------------------------|
| 2482 | Igh-VJ558                       | Immunoglobulin heavy chain (J558 family)                                         | 3.92E-03 | ---                                                                  |
| 2483 | Cp                              | ceruloplasmin                                                                    | 3.92E-03 | NM_001042611 /// NM_007752                                           |
| 2484 | Acox1                           | acyl-Coenzyme A oxidase 1, palmitoyl                                             | 3.93E-03 | NM_015729                                                            |
| 2485 | Cyp2c37                         | cytochrome P450, family 2, subfamily c, polypeptide 37                           | 3.93E-03 | NM_010001                                                            |
| 2486 | Fbxo17                          | F-box protein 17                                                                 | 3.93E-03 | NM_015796                                                            |
| 2487 | Atf3                            | activating transcription factor 3                                                | 3.94E-03 | NM_007498                                                            |
| 2488 | Elf4enif1                       | eukaryotic translation initiation factor 4E nuclear import factor 1              | 3.95E-03 | NM_023743                                                            |
| 2489 | Tada1l                          | transcriptional adaptor 1 (HF11 homolog, yeast) like                             | 3.95E-03 | NM_030245                                                            |
| 2490 | Ighg                            | Immunoglobulin heavy chain (gamma polypeptide)                                   | 3.95E-03 | XM_001472541                                                         |
| 2491 | Slc29a3                         | solute carrier family 29 (nucleoside transporters), member 3                     | 3.95E-03 | NM_023596                                                            |
| 2492 | Ckap4                           | cytoskeleton-associated protein 4                                                | 3.96E-03 | NM_175451                                                            |
| 2493 | Arfrp1                          | ADP-ribosylation factor related protein 1                                        | 3.96E-03 | NM_029702                                                            |
| 2494 | Rap1b                           | RAS related protein 1b                                                           | 3.96E-03 | NM_024457                                                            |
| 2495 | Foxk2                           | forkhead box K2                                                                  | 3.96E-03 | NM_001080932                                                         |
| 2496 | Calr                            | calreticulin                                                                     | 3.97E-03 | NM_007591                                                            |
| 2497 | Ifit3                           | interferon-induced protein with tetratricopeptide repeats 3                      | 3.97E-03 | NM_010501                                                            |
| 2498 | Ncl                             | nucleolin                                                                        | 3.97E-03 | NM_010880                                                            |
| 2499 | Endod1                          | endonuclease domain containing 1                                                 | 3.98E-03 | NM_028013                                                            |
| 2500 | 2410066E13RIK                   | RIKEN cDNA 2410066E13 gene                                                       | 3.98E-03 | NM_026629                                                            |
| 2501 | Mavs                            | mitochondrial antiviral signaling protein                                        | 3.98E-03 | NM_144888                                                            |
| 2502 | Edem3                           | ER degradation enhancer, mannosidase alpha-like 3                                | 3.98E-03 | NM_001039644                                                         |
| 2503 | Capn1                           | calpain 1                                                                        | 3.99E-03 | NM_001110504 /// NM_007600                                           |
| 2504 | Chrn1                           | cholinergic receptor, nicotinic, beta polypeptide 1 (muscle)                     | 3.99E-03 | NM_009601                                                            |
| 2505 | Renbp                           | renin binding protein                                                            | 4.00E-03 | NM_023132                                                            |
| 2506 | Tm7sf3                          | Transmembrane 7 superfamily member 3                                             | 4.01E-03 | NM_026281 /// XM_001475674                                           |
| 2507 | Bace1                           | beta-site APP cleaving enzyme 1                                                  | 4.01E-03 | NM_001145947 /// NM_011792                                           |
| 2508 | P4ha2                           | procollagen-proline, 2-oxoglutarate 4-dioxygenase (proline 4-hydroxylase), alpha | 4.01E-03 | NM_001136076 /// NM_011031                                           |
| 2509 | Hoxd8                           | homeo box D8                                                                     | 4.02E-03 | NM_008276                                                            |
| 2510 | Il33                            | interleukin 33                                                                   | 4.03E-03 | NM_133775                                                            |
| 2511 | Slc2a1                          | solute carrier family 2 (facilitated glucose transporter), member 1              | 4.03E-03 | NM_011400                                                            |
| 2512 | Rps20                           | ribosomal protein S20                                                            | 4.03E-03 | NM_026147                                                            |
| 2513 | F9                              | coagulation factor IX                                                            | 4.03E-03 | NM_007979                                                            |
| 2514 | Grin1a                          | glutamate receptor, ionotropic, N-methyl D-aspartate-like 1A                     | 4.03E-03 | NM_178602                                                            |
| 2515 | Vps26b                          | vacuolar protein sorting 26 homolog B (yeast)                                    | 4.03E-03 | NM_178027                                                            |
| 2516 | Anxa2                           | annexin A2                                                                       | 4.04E-03 | NM_007585                                                            |
| 2517 | C630004H02RIK                   | RIKEN cDNA C630004H02 gene                                                       | 4.04E-03 | NM_175454                                                            |
| 2518 | Tcf3                            | transcription factor 3                                                           | 4.05E-03 | NM_001079822 /// NM_009332                                           |
| 2519 | Sat1                            | spermidine/spermine N1-acetyl transferase 1                                      | 4.07E-03 | NM_009121                                                            |
| 2520 | Nfx1                            | nuclear transcription factor, X-box binding 1                                    | 4.07E-03 | NM_023739                                                            |
| 2521 | BC024814                        | cDNA sequence BC024814                                                           | 4.09E-03 | NM_146247                                                            |
| 2522 | O610037L13RIK                   | RIKEN cDNA O610037L13 gene                                                       | 4.09E-03 | NM_028754                                                            |
| 2523 | Dbf4                            | DBF4 homolog (S. cerevisiae)                                                     | 4.09E-03 | NM_013726                                                            |
| 2524 | Uba5                            | ubiquitin-like modifier activating enzyme 5                                      | 4.10E-03 | NM_025692                                                            |
| 2525 | Sdc2                            | syndecan 2                                                                       | 4.10E-03 | NM_008304                                                            |
| 2526 | Raet1a /// Raet1b /// Raet1c // | retinoic acid early transcript 1, alpha /// retinoic acid early transcript beta  | 4.10E-03 | NM_009016 /// NM_009017 /// NM_009018 /// NM_020030 /// NM_198193 // |
| 2527 | 4930471M23RIK                   | RIKEN cDNA 4930471M23 gene                                                       | 4.10E-03 | NM_175675                                                            |

|      |                            |                                                                                           |          |                                                           |
|------|----------------------------|-------------------------------------------------------------------------------------------|----------|-----------------------------------------------------------|
| 2528 | Prr13                      | proline rich 13                                                                           | 4.11E-03 | NM_025385                                                 |
| 2529 | Amy1                       | amylase 1, salivary                                                                       | 4.11E-03 | NM_001110505 /// NM_007446                                |
| 2530 | Arcn1                      | archain 1                                                                                 | 4.11E-03 | NM_145985                                                 |
| 2531 | Mark1                      | MAP/microtubule affinity-regulating kinase 1                                              | 4.11E-03 | NM_145515                                                 |
| 2532 | Top3b                      | topoisomerase (DNA) III beta                                                              | 4.11E-03 | NM_011624                                                 |
| 2533 | Uap111                     | UDP-N-acteylglucosamine pyrophosphorylase 1-like 1                                        | 4.12E-03 | NM_001033293                                              |
| 2534 | LOC100045999 /// LOC640204 | similar to RAN, member RAS oncogene family /// similar to RAN, member RAS oncogene family | 4.13E-03 | NM_009391 /// XM_001475422 /// XR_034742                  |
| 2535 | Abhd10                     | abhydrolase domain containing 10                                                          | 4.13E-03 | NM_172511                                                 |
| 2536 | Gab1                       | growth factor receptor bound protein 2-associated protein 1                               | 4.14E-03 | NM_021356                                                 |
| 2537 | Ppm1a                      | protein phosphatase 1A, magnesium dependent, alpha isoform                                | 4.16E-03 | NM_008910                                                 |
| 2538 | Emp3                       | epithelial membrane protein 3                                                             | 4.16E-03 | NM_001146346 /// NM_010129                                |
| 2539 | ---                        | ---                                                                                       | 4.17E-03 | ---                                                       |
| 2540 | Snap29                     | synaptosomal-associated protein 29                                                        | 4.17E-03 | NM_023348                                                 |
| 2541 | Pdrg1                      | p53 and DNA damage regulated 1                                                            | 4.17E-03 | NM_178939                                                 |
| 2542 | Necap1                     | NECAP endocytosis associated 1                                                            | 4.18E-03 | NM_026267                                                 |
| 2543 | rp9                        | retinitis pigmentosa 9 (human)                                                            | 4.20E-03 | NM_018739                                                 |
| 2544 | Speg                       | SPEG complex locus                                                                        | 4.20E-03 | NM_001085370 /// NM_001085371 /// NM_007463               |
| 2545 | Arfgap3 /// LOC100045474   | ADP-ribosylation factor GTPase activating protein 3 /// similar to ADP-ribosylat          | 4.20E-03 | NM_025445 /// XR_032156                                   |
| 2546 | 2410002022Rik              | RIKEN cDNA 2410002022 gene                                                                | 4.20E-03 | NM_001093759 /// NM_001093760 /// NM_025879 /// NR_003546 |
| 2547 | LOC100048604 /// Ninj2     | similar to ninjurin2 /// ninjurin 2                                                       | 4.20E-03 | NM_016718 /// XM_001480570                                |
| 2548 | Sgms1                      | sphingomyelin synthase 1                                                                  | 4.20E-03 | NM_144792                                                 |
| 2549 | Plk2                       | polo-like kinase 2 (Drosophila)                                                           | 4.21E-03 | NM_152804                                                 |
| 2550 | Wipi1                      | WD repeat domain, phosphoinositide interacting 1                                          | 4.21E-03 | NM_145940                                                 |
| 2551 | Rnf128                     | ring finger protein 128                                                                   | 4.23E-03 | NM_023270                                                 |
| 2552 | Calm1                      | calmodulin 1                                                                              | 4.23E-03 | NM_009790                                                 |
| 2553 | Lgtn                       | ligatin                                                                                   | 4.23E-03 | NM_001136070 /// NM_010709                                |
| 2554 | Mocos                      | molybdenum cofactor sulfurase                                                             | 4.23E-03 | NM_026779                                                 |
| 2555 | Wdr1                       | WD repeat domain 1                                                                        | 4.24E-03 | NM_011715                                                 |
| 2556 | Cox6c                      | cytochrome c oxidase, subunit VIc                                                         | 4.24E-03 | NM_053071                                                 |
| 2557 | Rbm3                       | RNA binding motif protein 3                                                               | 4.24E-03 | NM_016809                                                 |
| 2558 | Ndufs8                     | NADH dehydrogenase (ubiquinone) Fe-S protein 8                                            | 4.24E-03 | NM_144870                                                 |
| 2559 | Lmbr1l                     | limb region 1 like                                                                        | 4.25E-03 | NM_029098                                                 |
| 2560 | Sh3glb1                    | SH3-domain GRB2-like B1 (endophilin)                                                      | 4.28E-03 | NM_019464                                                 |
| 2561 | Ehhadh                     | enoyl-Coenzyme A hydratase/3-hydroxyacyl Coenzyme A dehydrogenase                         | 4.29E-03 | NM_023737                                                 |
| 2562 | Man1b1                     | mannosidase, alpha, class 1B, member 1                                                    | 4.30E-03 | NM_001029983                                              |
| 2563 | Pnkd                       | paroxysmal nonkinesinogenic dyskinesia                                                    | 4.30E-03 | NM_001039509 /// NM_019999 /// NM_025580                  |
| 2564 | Tceal1                     | transcription elongation factor A (SII)-like 1                                            | 4.30E-03 | NM_146236                                                 |
| 2565 | Capns1                     | calpain, small subunit 1                                                                  | 4.30E-03 | NM_009795                                                 |
| 2566 | Tmlhe                      | trimethyllysine hydroxylase, epsilon                                                      | 4.31E-03 | NM_138758                                                 |
| 2567 | Slc25a33                   | solute carrier family 25, member 33                                                       | 4.31E-03 | NM_027460                                                 |
| 2568 | Ptprs                      | protein tyrosine phosphatase, receptor type, S                                            | 4.32E-03 | NM_011218                                                 |
| 2569 | Tor1b                      | torsin family 1, member B                                                                 | 4.32E-03 | NM_133673                                                 |
| 2570 | Snca                       | synuclein, gamma                                                                          | 4.32E-03 | NM_011430                                                 |
| 2571 | Trim2                      | tripartite motif-containing 2                                                             | 4.32E-03 | NM_030706                                                 |
| 2572 | Set                        | SET translocation                                                                         | 4.34E-03 | NM_023871                                                 |
| 2573 | Plp2                       | proteolipid protein 2                                                                     | 4.35E-03 | NM_019755                                                 |



|      |                                 |                                                                                  |          |                                                                     |
|------|---------------------------------|----------------------------------------------------------------------------------|----------|---------------------------------------------------------------------|
| 2574 | LOC100045442 /// Stag1          | similar to Stromal antigen 1 /// stromal antigen 1                               | 4.36E-03 | NM_009282 /// XM_001474252                                          |
| 2575 | Gypa                            | glycophorin A                                                                    | 4.36E-03 | NM_010369                                                           |
| 2576 | Plek                            | pleckstrin                                                                       | 4.36E-03 | NM_019549                                                           |
| 2577 | Mmab                            | methylmalonic aciduria (cobalamin deficiency) type B homolog (human)             | 4.38E-03 | NM_029956                                                           |
| 2578 | Sfrs3                           | splicing factor, arginine/serine-rich 3 (SRp20)                                  | 4.38E-03 | NM_013663                                                           |
| 2579 | Pitpnc1                         | phosphatidylinositol transfer protein, cytoplasmic 1                             | 4.38E-03 | NM_145823                                                           |
| 2580 | LOC100046843 /// Msh3           | similar to mutS homolog 3 /// mutS homolog 3 (E. coli)                           | 4.38E-03 | NM_010829 /// XM_001475901                                          |
| 2581 | Aldoa                           | aldolase A, fructose-bisphosphate                                                | 4.39E-03 | NM_007438                                                           |
| 2582 | Gm10241 /// Gm13430 /// Gm13690 | predicted gene 10241 /// predicted gene 13430 /// predicted gene 13690 /// simil | 4.39E-03 | NM_133354 /// XM_001475721 /// XM_001476458 /// XM_001476473 /// XM |
| 2583 | Cbl                             | Casitas B-lineage lymphoma                                                       | 4.39E-03 | NM_007619                                                           |
| 2584 | Prkg2                           | protein kinase, cGMP-dependent, type II                                          | 4.40E-03 | NM_008926                                                           |
| 2585 | Set                             | SET translocation                                                                | 4.41E-03 | NM_023871                                                           |
| 2586 | Rnf111                          | ring finger 111                                                                  | 4.41E-03 | NM_033604                                                           |
| 2587 | Iqgap3                          | IQ motif containing GTPase activating protein 3                                  | 4.42E-03 | NM_001033484                                                        |
| 2588 | Tbca                            | tubulin cofactor A                                                               | 4.42E-03 | NM_009321                                                           |
| 2589 | Sart3                           | squamous cell carcinoma antigen recognized by T-cells 3                          | 4.43E-03 | NM_016926                                                           |
| 2590 | Nsdhl                           | NAD(P) dependent steroid dehydrogenase-like                                      | 4.43E-03 | NM_010941                                                           |
| 2591 | Ncdn                            | neurochondrin                                                                    | 4.43E-03 | NM_011986                                                           |
| 2592 | BC004004                        | cDNA sequence BC004004                                                           | 4.43E-03 | NM_030561                                                           |
| 2593 | Sec16a                          | SEC16 homolog A (S. cerevisiae)                                                  | 4.43E-03 | NM_153125                                                           |
| 2594 | Ptgs1                           | prostaglandin-endoperoxide synthase 1                                            | 4.43E-03 | NM_008969                                                           |
| 2595 | Tomm22                          | translocase of outer mitochondrial membrane 22 homolog (yeast)                   | 4.44E-03 | NM_172609                                                           |
| 2596 | Gm5256 /// Gm5529 /// Slc25a2   | predicted gene 5256 /// predicted gene 5529 /// solute carrier family 25 (mitoch | 4.45E-03 | NM_007451 /// XM_484885 /// XM_904056 /// XR_032730 /// XR_033954   |
| 2597 | Gcnt2                           | glucosaminyl (N-acetyl) transferase 2, I-branching enzyme                        | 4.46E-03 | NM_008105 /// NM_023887 /// NM_133219                               |
| 2598 | Vps29                           | vacuolar protein sorting 29 (S. pombe)                                           | 4.47E-03 | NM_019780                                                           |
| 2599 | Hspa9                           | heat shock protein 9                                                             | 4.48E-03 | NM_010481                                                           |
| 2600 | Frk                             | fyn-related kinase                                                               | 4.48E-03 | NM_001159544 /// NM_010237                                          |
| 2601 | Col14a1                         | collagen, type XIV, alpha 1                                                      | 4.48E-03 | NM_181277                                                           |
| 2602 | Sertad2                         | SERTA domain containing 2                                                        | 4.49E-03 | NM_001038625 /// NM_021372                                          |
| 2603 | Dpep1                           | dipeptidase 1 (renal)                                                            | 4.49E-03 | NM_007876                                                           |
| 2604 | Ehd4                            | EH-domain containing 4                                                           | 4.49E-03 | NM_133838                                                           |
| 2605 | Asf1b                           | ASF1 anti-silencing function 1 homolog B (S. cerevisiae)                         | 4.49E-03 | NM_024184                                                           |
| 2606 | Hdac11                          | histone deacetylase 11                                                           | 4.50E-03 | NM_144919                                                           |
| 2607 | Thrap3                          | thyroid hormone receptor associated protein 3                                    | 4.51E-03 | NM_146153                                                           |
| 2608 | ---                             | ---                                                                              | 4.52E-03 | ---                                                                 |
| 2609 | Rbp7                            | retinol binding protein 7, cellular                                              | 4.54E-03 | NM_022020                                                           |
| 2610 | Jak1                            | Janus kinase 1                                                                   | 4.54E-03 | NM_146145                                                           |
| 2611 | Zfp467                          | zinc finger protein 467                                                          | 4.54E-03 | NM_001085415 /// NM_001085416 /// NM_001085417 /// NM_020589        |
| 2612 | Brwd1                           | bromodomain and WD repeat domain containing 1                                    | 4.55E-03 | NM_001103179 /// NM_145125 /// NM_176928                            |
| 2613 | Sag                             | retinal S-antigen                                                                | 4.55E-03 | NM_009118                                                           |
| 2614 | Cd151                           | CD151 antigen                                                                    | 4.55E-03 | NM_001111049 /// NM_001111050 /// NM_009842                         |
| 2615 | Dcackd                          | dephospho-CoA kinase domain containing                                           | 4.55E-03 | NM_026551                                                           |
| 2616 | Fcrla                           | Fc receptor-like A                                                               | 4.57E-03 | NM_001160215 /// NM_145141 /// NR_027666                            |
| 2617 | Epha2                           | Eph receptor A2                                                                  | 4.60E-03 | NM_010139                                                           |
| 2618 | Mynn                            | myoneurin                                                                        | 4.61E-03 | NM_030557                                                           |
| 2619 | Bcs1l                           | BCS1-like (yeast)                                                                | 4.61E-03 | NM_025784                                                           |

|      |                         |                                                                                |          |                                                     |
|------|-------------------------|--------------------------------------------------------------------------------|----------|-----------------------------------------------------|
| 2620 | Tex9                    | testis expressed gene 9                                                        | 4.61E-03 | NM_009359                                           |
| 2621 | Stk24                   | serine/threonine kinase 24 (STE20 homolog, yeast)                              | 4.61E-03 | NM_145465                                           |
| 2622 | Fgd2                    | FYVE, RhoGEF and PH domain containing 2                                        | 4.61E-03 | NM_001159538 /// NM_013710                          |
| 2623 | Fbxo2                   | F-box protein 2                                                                | 4.62E-03 | NM_176848                                           |
| 2624 | Acer2                   | alkaline ceramidase 2                                                          | 4.62E-03 | NM_139306                                           |
| 2625 | Il4ra                   | interleukin 4 receptor, alpha                                                  | 4.62E-03 | NM_001008700                                        |
| 2626 | U2af2                   | U2 small nuclear ribonucleoprotein auxiliary factor (U2AF) 2                   | 4.63E-03 | NM_133671                                           |
| 2627 | Uqcrb                   | ubiquinol-cytochrome c reductase binding protein                               | 4.63E-03 | NM_026219                                           |
| 2628 | Thoc4                   | THO complex 4                                                                  | 4.64E-03 | NM_011568                                           |
| 2629 | Pmm2                    | phosphomannomutase 2                                                           | 4.64E-03 | NM_016881                                           |
| 2630 | Igh                     | immunoglobulin heavy chain complex                                             | 4.66E-03 | ---                                                 |
| 2631 | Tiam1                   | T-cell lymphoma invasion and metastasis 1                                      | 4.66E-03 | NM_001145886 /// NM_001145887 /// NM_009384         |
| 2632 | Wfikkn1                 | WAP, FS, Ig, KU, and NTR-containing protein 1                                  | 4.67E-03 | NM_001100454 /// XM_128578 /// XM_914842            |
| 2633 | Gstt3                   | glutathione S-transferase, theta 3                                             | 4.67E-03 | NM_133994                                           |
| 2634 | Map3k3                  | mitogen-activated protein kinase kinase kinase 3                               | 4.68E-03 | NM_011947                                           |
| 2635 | Pvr12                   | poliovirus receptor-related 2                                                  | 4.68E-03 | NM_001159724 /// NM_008990                          |
| 2636 | Mrps9                   | mitochondrial ribosomal protein S9                                             | 4.70E-03 | NM_023514                                           |
| 2637 | Il1rl1                  | interleukin 1 receptor-like 1                                                  | 4.70E-03 | NM_001025602 /// NM_010743                          |
| 2638 | Snrnp40                 | small nuclear ribonucleoprotein 40 (U5)                                        | 4.70E-03 | NM_025645                                           |
| 2639 | Atp6v0a2                | ATPase, H+ transporting, lysosomal V0 subunit A2                               | 4.71E-03 | NM_011596                                           |
| 2640 | Htr1a                   | 5-hydroxytryptamine (serotonin) receptor 1A                                    | 4.71E-03 | NM_008308                                           |
| 2641 | Coro2a                  | coronin, actin binding protein 2A                                              | 4.72E-03 | NM_178893                                           |
| 2642 | Ccr2                    | chemokine (C-C motif) receptor 2                                               | 4.72E-03 | NM_009915                                           |
| 2643 | Tom1                    | target of myb1 homolog (chicken)                                               | 4.72E-03 | NM_001136259 /// NM_011622                          |
| 2644 | Dtymk                   | deoxythymidylate kinase                                                        | 4.72E-03 | NM_001105667 /// NM_023136                          |
| 2645 | Aqp7                    | aquaporin 7                                                                    | 4.73E-03 | NM_007473                                           |
| 2646 | Acpp                    | acid phosphatase, prostate                                                     | 4.73E-03 | NM_019807 /// NM_207668                             |
| 2647 | ---                     | ---                                                                            | 4.73E-03 | ---                                                 |
| 2648 | Dedd2                   | death effector domain-containing DNA binding protein 2                         | 4.74E-03 | NM_207677                                           |
| 2649 | Dusp7                   | dual specificity phosphatase 7                                                 | 4.74E-03 | NM_153459                                           |
| 2650 | Pigm                    | phosphatidylinositol glycan anchor biosynthesis, class M                       | 4.75E-03 | NM_026234                                           |
| 2651 | Git1                    | G protein-coupled receptor kinase-interactor 1                                 | 4.75E-03 | NM_001004144                                        |
| 2652 | Lgals8                  | lectin, galactose binding, soluble 8                                           | 4.75E-03 | NM_018886                                           |
| 2653 | Acd /// Nsd1            | adrenocortical dysplasia /// nuclear receptor-binding SET-domain protein 1     | 4.75E-03 | NM_001012638 /// NM_008739                          |
| 2654 | Orm1                    | orosomucoid 1                                                                  | 4.75E-03 | NM_008768                                           |
| 2655 | Slc38a10                | solute carrier family 38, member 10                                            | 4.76E-03 | NM_024249                                           |
| 2656 | 1110031102RIK           | RIKEN cDNA 1110031102 gene                                                     | 4.77E-03 | NM_025402                                           |
| 2657 | ---                     | ---                                                                            | 4.77E-03 | ---                                                 |
| 2658 | Ilgp1                   | interferon inducible GTPase 1                                                  | 4.79E-03 | NM_001146275 /// NM_021792                          |
| 2659 | Atp2c1 /// LOC100045884 | ATPase, Ca++-sequestering /// hypothetical protein LOC100045884                | 4.79E-03 | NM_175025 /// XM_001475215                          |
| 2660 | Porcn                   | porcupine homolog (Drosophila)                                                 | 4.79E-03 | NM_016913 /// NM_023638 /// NM_145907 /// NM_145908 |
| 2661 | AA881470                | EST AA881470                                                                   | 4.80E-03 | NM_172724 /// NM_181066                             |
| 2662 | Il22 /// Il1fb          | interleukin 22 /// interleukin 10-related T cell-derived inducible factor beta | 4.80E-03 | NM_016971 /// NM_054079                             |
| 2663 | Ctage5                  | CTAGE family, member 5                                                         | 4.80E-03 | NM_146034                                           |
| 2664 | Zfp59                   | zinc finger protein 59                                                         | 4.81E-03 | NM_011762                                           |
| 2665 | Lmbrd1                  | LMBR1 domain containing 1                                                      | 4.81E-03 | NM_026719                                           |

|      |                         |                                                                                  |          |                                                                     |
|------|-------------------------|----------------------------------------------------------------------------------|----------|---------------------------------------------------------------------|
| 2666 | Endog                   | endonuclease G                                                                   | 4.82E-03 | NM_007931                                                           |
| 2667 | Rpl12                   | ribosomal protein L12                                                            | 4.82E-03 | NM_009076                                                           |
| 2668 | Igk                     | immunoglobulin kappa chain complex                                               | 4.82E-03 | ---                                                                 |
| 2669 | Tubb2c /// Tubb2c-ps2   | tubulin, beta 2C /// tubulin, beta 2c, pseudogene 2                              | 4.83E-03 | NM_146116 /// XR_032016 /// XR_032129                               |
| 2670 | Cnm2                    | cyclin M2                                                                        | 4.86E-03 | NM_001102471 /// NM_033569                                          |
| 2671 | Rbm14                   | RNA binding motif protein 14                                                     | 4.86E-03 | NM_019869                                                           |
| 2672 | Nasp                    | nuclear autoantigenic sperm protein (histone-binding)                            | 4.86E-03 | NM_001081475 /// NM_016777                                          |
| 2673 | Tshz2                   | teashirt zinc finger family member 2                                             | 4.86E-03 | NM_080455                                                           |
| 2674 | LOC100048071 /// Tex21  | similar to tsec-2 /// testis expressed gene 21                                   | 4.87E-03 | NM_001159532 /// NM_019784 /// XR_034206                            |
| 2675 | LOC100046930 /// Sh2d1a | similar to T cell signal transduction molecule1 SAP /// SH2 domain protein 1A    | 4.87E-03 | NM_011364 /// XM_001477084                                          |
| 2676 | Mcoln1                  | mucopolin 1                                                                      | 4.87E-03 | NM_053177                                                           |
| 2677 | Samd4                   | sterile alpha motif domain containing 4                                          | 4.89E-03 | NM_001037221 /// NM_001163433 /// NM_028966                         |
| 2678 | Pmf1                    | polyamine-modulated factor 1                                                     | 4.90E-03 | NM_025928                                                           |
| 2679 | Cidec                   | cell death-inducing DFFA-like effector c                                         | 4.90E-03 | NM_178373                                                           |
| 2680 | AU040320                | expressed sequence AU040320                                                      | 4.90E-03 | NM_001035525 /// NM_001035526 /// NM_133886                         |
| 2681 | Ikbkb                   | inhibitor of kappaB kinase beta                                                  | 4.90E-03 | NM_001159774 /// NM_010546                                          |
| 2682 | 1810011010RIK           | RIKEN cDNA 1810011010 gene                                                       | 4.90E-03 | NM_026931                                                           |
| 2683 | Rilpl1                  | Rab interacting lysosomal protein-like 1                                         | 4.90E-03 | NM_021430                                                           |
| 2684 | Setdb1                  | SET domain, bifurcated 1                                                         | 4.92E-03 | NM_001163641 /// NM_001163642 /// NM_018877                         |
| 2685 | Rbm22                   | RNA binding motif protein 22                                                     | 4.92E-03 | NM_025776                                                           |
| 2686 | Map3k12                 | mitogen-activated protein kinase kinase kinase 12                                | 4.92E-03 | NM_001163643 /// NM_009582                                          |
| 2687 | Eif4ebp2                | eukaryotic translation initiation factor 4E binding protein 2                    | 4.92E-03 | NM_010124                                                           |
| 2688 | Dyrk3                   | dual-specificity tyrosine-(Y)-phosphorylation regulated kinase 3                 | 4.93E-03 | NM_145508                                                           |
| 2689 | Ap2b1                   | adaptor-related protein complex 2, beta 1 subunit                                | 4.93E-03 | NM_001035854 /// NM_027915                                          |
| 2690 | Tlr7                    | toll-like receptor 7                                                             | 4.94E-03 | NM_133211                                                           |
| 2691 | Dhx9                    | DEAH (Asp-Glu-Ala-His) box polypeptide 9                                         | 4.96E-03 | NM_007842                                                           |
| 2692 | Igh-6                   | Immunoglobulin heavy chain 6 (heavy chain of IgM)                                | 4.96E-03 | ---                                                                 |
| 2693 | Cnm2                    | cyclin M2                                                                        | 4.96E-03 | NM_001102471 /// NM_033569                                          |
| 2694 | Marveld3                | MARVEL (membrane-associating) domain containing 3                                | 4.97E-03 | NM_028584 /// NM_212447                                             |
| 2695 | Tep1                    | telomerase associated protein 1                                                  | 4.97E-03 | NM_009351                                                           |
| 2696 | Stk16                   | serine/threonine kinase 16                                                       | 4.98E-03 | NM_011494                                                           |
| 2697 | LOC100045999 /// Ran    | similar to RAN, member RAS oncogene family /// RAN, member RAS oncogene famil    | 4.99E-03 | NM_009391 /// XM_001475422                                          |
| 2698 | Gltp                    | glycolipid transfer protein                                                      | 4.99E-03 | NM_019821                                                           |
| 2699 | Zfp790                  | zinc finger protein 790                                                          | 5.00E-03 | NM_001145880 /// NM_146185                                          |
| 2700 | Mff                     | mitochondrial fission factor                                                     | 5.00E-03 | NM_029409                                                           |
| 2701 | Pkd1                    | polycystic kidney disease 1 homolog                                              | 5.01E-03 | NM_013630                                                           |
| 2702 | Mcm4                    | minichromosome maintenance deficient 4 homolog (S. cerevisiae)                   | 5.02E-03 | NM_008565                                                           |
| 2703 | Ss18                    | synovial sarcoma translocation, Chromosome 18                                    | 5.02E-03 | NM_001161369 /// NM_001161370 /// NM_001161371 /// NM_009280        |
| 2704 | Rbm16                   | RNA binding motif protein 16                                                     | 5.02E-03 | NM_134123 /// XM_619423 /// XM_918778                               |
| 2705 | Rnf114                  | ring finger protein 114                                                          | 5.02E-03 | NM_030743                                                           |
| 2706 | Arfp2                   | ADP-ribosylation factor interacting protein 2                                    | 5.02E-03 | NM_029802                                                           |
| 2707 | Dnajb6 /// LOC100048324 | DnaJ (Hsp40) homolog, subfamily B, member 6 /// similar to DnaJ (Hsp40) homolog  | 5.04E-03 | NM_001037940 /// NM_001037941 /// NM_001127367 /// NM_011847 /// XM |
| 2708 | Tmem159                 | transmembrane protein 159                                                        | 5.04E-03 | NM_145586                                                           |
| 2709 | Adamts1                 | a disintegrin-like and metallopeptidase (reprolysin type) with thrombospondin ty | 5.05E-03 | NM_009621                                                           |
| 2710 | Psm6                    | proteasome (prosome, macropain) 26S subunit, non-ATPase, 6                       | 5.06E-03 | NM_025550                                                           |
| 2711 | LOC100047393 /// Nae1   | similar to Amyloid beta precursor protein binding protein 1 /// NEDD8 activating | 5.07E-03 | NM_144931 /// XM_001478170                                          |

|      |                             |                                                                         |          |                                                              |
|------|-----------------------------|-------------------------------------------------------------------------|----------|--------------------------------------------------------------|
| 2712 | Myh6                        | myosin, heavy polypeptide 6, cardiac muscle, alpha                      | 5.07E-03 | NM_001164171 /// NM_010856                                   |
| 2713 | Glx2                        | glutaredoxin 2 (thioltransferase)                                       | 5.07E-03 | NM_001038592 /// NM_001038593 /// NM_001038594 /// NM_023505 |
| 2714 | Tcea1                       | transcription elongation factor A (SII) 1                               | 5.07E-03 | NM_001159750 /// NM_001159751 /// NM_011541                  |
| 2715 | Cyb5                        | cytochrome b-5                                                          | 5.08E-03 | NM_025797                                                    |
| 2716 | Polr1a                      | polymerase (RNA) I polypeptide A                                        | 5.08E-03 | NM_009088                                                    |
| 2717 | Tipr1                       | TIP41, TOR signalling pathway regulator-like (S. cerevisiae)            | 5.08E-03 | NM_145513                                                    |
| 2718 | C79407                      | expressed sequence C79407                                               | 5.09E-03 | NM_172578                                                    |
| 2719 | Atp11a                      | ATPase, class VI, type 11A                                              | 5.09E-03 | NM_015804                                                    |
| 2720 | Itk                         | IL2-inducible T-cell kinase                                             | 5.10E-03 | NM_010583                                                    |
| 2721 | Mospd2                      | motile sperm domain containing 2                                        | 5.10E-03 | NM_029730                                                    |
| 2722 | Saps2                       | SAPS domain family, member 2                                            | 5.10E-03 | NM_026813 /// NM_027805                                      |
| 2723 | Epb4.1l2                    | erythrocyte protein band 4.1-like 2                                     | 5.11E-03 | NM_013511                                                    |
| 2724 | Tyms                        | thymidylate synthase                                                    | 5.12E-03 | NM_021288                                                    |
| 2725 | Abhd4                       | abhydrolase domain containing 4                                         | 5.13E-03 | NM_134076                                                    |
| 2726 | Gapdh                       | glyceraldehyde-3-phosphate dehydrogenase                                | 5.14E-03 | NM_008084                                                    |
| 2727 | 1810019J16Rik               | RIKEN cDNA 1810019J16 gene                                              | 5.14E-03 | NM_001083916 /// NM_133707                                   |
| 2728 | Phpp1                       | PH domain and leucine rich repeat protein phosphatase 1                 | 5.15E-03 | NM_133821 /// XM_001475839 /// XM_129968                     |
| 2729 | Egfl7                       | EGF-like domain 7                                                       | 5.15E-03 | NM_001164564 /// NM_178444 /// NM_198724 /// NM_198725       |
| 2730 | Snx16                       | sorting nexin 16                                                        | 5.15E-03 | NM_001127191 /// NM_029068                                   |
| 2731 | Galm                        | galactose mutarotase                                                    | 5.17E-03 | NM_176963                                                    |
| 2732 | Cib1                        | calcium and integrin binding 1 (calmyrin)                               | 5.17E-03 | NM_011870                                                    |
| 2733 | Pisd-ps3                    | phosphatidylserine decarboxylase, pseudogene 3                          | 5.18E-03 | NR_003518                                                    |
| 2734 | Cpeb4                       | cytoplasmic polyadenylation element binding protein 4                   | 5.19E-03 | NM_026252                                                    |
| 2735 | Smr2                        | submaxillary gland androgen regulated protein 2                         | 5.19E-03 | NM_021289                                                    |
| 2736 | 4932425I24Rik               | RIKEN cDNA 4932425I24 gene                                              | 5.19E-03 | NM_001081025                                                 |
| 2737 | Rabif                       | RAB interacting factor                                                  | 5.19E-03 | NM_145510                                                    |
| 2738 | Clns1a                      | chloride channel, nucleotide-sensitive, 1A                              | 5.20E-03 | NM_023671                                                    |
| 2739 | Fkbp1a                      | FK506 binding protein 1a                                                | 5.20E-03 | NM_008019                                                    |
| 2740 | Ltbp3                       | latent transforming growth factor beta binding protein 3                | 5.22E-03 | NM_008520                                                    |
| 2741 | Rnpc3                       | RNA-binding region (RNP1, RRM) containing 3                             | 5.22E-03 | NM_001038696 /// NM_026043                                   |
| 2742 | Gtf2f1                      | general transcription factor IIF, polypeptide 1                         | 5.23E-03 | NM_133801                                                    |
| 2743 | Cmtm8                       | CKLF-like MARVEL transmembrane domain containing 8                      | 5.23E-03 | NM_027294                                                    |
| 2744 | St13                        | Suppression of tumorigenicity 13                                        | 5.23E-03 | NM_133726                                                    |
| 2745 | Map3k8                      | mitogen-activated protein kinase kinase kinase 8                        | 5.24E-03 | NM_007746                                                    |
| 2746 | Parp6                       | poly (ADP-ribose) polymerase family, member 6                           | 5.24E-03 | NM_029922                                                    |
| 2747 | Dclk1                       | doublecortin-like kinase 1                                              | 5.25E-03 | NM_001111051 /// NM_001111052 /// NM_001111053 /// NM_019978 |
| 2748 | Acp6                        | acid phosphatase 6, lysophosphatidic                                    | 5.26E-03 | NM_019800                                                    |
| 2749 | LOC100046746 /// Smap1      | similar to SMAP1 /// stromal membrane-associated protein 1              | 5.26E-03 | NM_028534 /// XM_001476743                                   |
| 2750 | Hmgcs2                      | 3-hydroxy-3-methylglutaryl-Coenzyme A synthase 2                        | 5.27E-03 | NM_008256                                                    |
| 2751 | Pxn                         | paxillin                                                                | 5.28E-03 | NM_011223 /// NM_133915                                      |
| 2752 | Sifn4                       | schlafen 4                                                              | 5.29E-03 | NM_011410                                                    |
| 2753 | Elk3                        | ELK3, member of ETS oncogene family                                     | 5.30E-03 | NM_013508 /// NM_205536                                      |
| 2754 | 6720487G11Rik /// Zfp71-rs1 | RIKEN cDNA 6720487G11 gene /// zinc finger protein 71, related sequence | 5.30E-03 | XM_620861 /// XM_990694                                      |
| 2755 | Galr2                       | galanin receptor 2                                                      | 5.31E-03 | NM_010254                                                    |
| 2756 | Efnb2                       | ephrin B2                                                               | 5.32E-03 | NM_010111                                                    |
| 2757 | Cast                        | calpastatin                                                             | 5.32E-03 | NM_009817                                                    |

|      |               |                                                                         |          |                                                              |
|------|---------------|-------------------------------------------------------------------------|----------|--------------------------------------------------------------|
| 2758 | Cdkn2c        | cyclin-dependent kinase inhibitor 2C (p18, inhibits CDK4)               | 5.33E-03 | NM_007671                                                    |
| 2759 | Zfand2a       | zinc finger, AN1-type domain 2A                                         | 5.33E-03 | NM_001159908 /// NM_133349                                   |
| 2760 | Cks2          | CDC28 protein kinase regulatory subunit 2                               | 5.33E-03 | NM_025415                                                    |
| 2761 | Gap43         | growth associated protein 43                                            | 5.35E-03 | NM_008083                                                    |
| 2762 | Pcsk5         | proprotein convertase subtilisin/kexin type 5                           | 5.35E-03 | NM_001163144 /// XM_129214 /// XM_987372                     |
| 2763 | Tspan3        | tetraspanin 3                                                           | 5.36E-03 | NM_019793                                                    |
| 2764 | Mrps9         | mitochondrial ribosomal protein S9                                      | 5.36E-03 | NM_023514                                                    |
| 2765 | Myst3         | MYST histone acetyltransferase (monocytic leukemia) 3                   | 5.36E-03 | NM_001081149                                                 |
| 2766 | Traf3ip2      | TRAF3 interacting protein 2                                             | 5.38E-03 | NM_134000                                                    |
| 2767 | Bcl2l14       | BCL2-like 14 (apoptosis facilitator)                                    | 5.38E-03 | NM_025778                                                    |
| 2768 | Zfp296        | zinc finger protein 296                                                 | 5.38E-03 | NM_022409                                                    |
| 2769 | Igkv15-103    | immunoglobulin kappa chain variable 15-103                              | 5.39E-03 | XM_001476407                                                 |
| 2770 | Trem3         | triggering receptor expressed on myeloid cells 3                        | 5.41E-03 | NM_021407                                                    |
| 2771 | DXErttd223e   | DNA segment, Chr X, ERATO Doi 223, expressed                            | 5.41E-03 | ---                                                          |
| 2772 | Add3          | adducin 3 (gamma)                                                       | 5.43E-03 | NM_001164099 /// NM_001164100 /// NM_001164101 /// NM_013758 |
| 2773 | Kctd9         | potassium channel tetramerisation domain containing 9                   | 5.43E-03 | NM_001111028 /// NM_134073                                   |
| 2774 | Ctr9          | Ctr9, Paf1/RNA polymerase II complex component, homolog (S. cerevisiae) | 5.44E-03 | NM_009431                                                    |
| 2775 | Pou2f1        | POU domain, class 2, transcription factor 1                             | 5.44E-03 | NM_011137 /// NM_198932 /// NM_198933 /// NM_198934          |
| 2776 | Shmt2         | serine hydroxymethyltransferase 2 (mitochondrial)                       | 5.44E-03 | NM_028230                                                    |
| 2777 | Slc20a1       | solute carrier family 20, member 1                                      | 5.45E-03 | NM_001159593 /// NM_015747                                   |
| 2778 | Ldlrap1       | low density lipoprotein receptor adaptor protein 1                      | 5.45E-03 | NM_145554                                                    |
| 2779 | Gadd45b       | growth arrest and DNA-damage-inducible 45 beta                          | 5.45E-03 | NM_008655                                                    |
| 2780 | Htatsf1       | HIV TAT specific factor 1                                               | 5.45E-03 | NM_028242                                                    |
| 2781 | D030029J20Rik | RIKEN cDNA D030029J20 gene                                              | 5.45E-03 | ---                                                          |
| 2782 | Pgp           | phosphoglycolate phosphatase                                            | 5.46E-03 | NM_025954                                                    |
| 2783 | Masp2         | mannan-binding lectin serine peptidase 2                                | 5.46E-03 | NM_001003893 /// NM_010767                                   |
| 2784 | Nat6          | N-acetyltransferase 6                                                   | 5.47E-03 | NM_019750                                                    |
| 2785 | Rab31         | RAB31, member RAS oncogene family                                       | 5.48E-03 | NM_133685                                                    |
| 2786 | Prkar1b       | protein kinase, cAMP dependent regulatory, type I beta                  | 5.49E-03 | NM_008923                                                    |
| 2787 | Tmem38a       | transmembrane protein 38A                                               | 5.49E-03 | NM_144534                                                    |
| 2788 | Arhgef16      | Rho guanine nucleotide exchange factor (GEF) 16                         | 5.50E-03 | NM_001112744 /// XM_149562 /// XM_902459                     |
| 2789 | Unc50         | unc-50 homolog (C. elegans)                                             | 5.50E-03 | NM_026123                                                    |
| 2790 | Amdhd1        | amidohydrolase domain containing 1                                      | 5.51E-03 | NM_027908 /// XM_125854 /// XM_990660                        |
| 2791 | Nap113        | nucleosome assembly protein 1-like 3                                    | 5.53E-03 | NM_138742                                                    |
| 2792 | Prkd1         | protein kinase D1                                                       | 5.54E-03 | NM_008858                                                    |
| 2793 | Plscr1        | phospholipid scramblase 1                                               | 5.54E-03 | NM_011636                                                    |
| 2794 | 1100001G20Rik | RIKEN cDNA 1100001G20 gene                                              | 5.55E-03 | NM_183249                                                    |
| 2795 | Sgpl1         | sphingosine phosphate lyase 1                                           | 5.57E-03 | NM_009163                                                    |
| 2796 | Ipk6k1        | inositol hexaphosphate kinase 1                                         | 5.57E-03 | NM_013785                                                    |
| 2797 | Pts           | 6-pyruvoyl-tetrahydropterin synthase                                    | 5.58E-03 | NM_011220                                                    |
| 2798 | Ube2e3        | ubiquitin-conjugating enzyme E2E 3, UBC4/5 homolog (yeast)              | 5.58E-03 | NM_009454                                                    |
| 2799 | Tpp2          | tripeptidyl peptidase II                                                | 5.59E-03 | NM_009418                                                    |
| 2800 | BC022687      | cDNA sequence BC022687                                                  | 5.60E-03 | NM_145450                                                    |
| 2801 | Cldn1         | claudin 1                                                               | 5.60E-03 | NM_016674                                                    |
| 2802 | Lims1         | LIM and senescent cell antigen-like domains 1                           | 5.61E-03 | NM_026148                                                    |
| 2803 | Pafah2        | platelet-activating factor acetylhydrolase 2                            | 5.61E-03 | NM_133880                                                    |

|      |                            |                                                                                  |          |                                                                       |
|------|----------------------------|----------------------------------------------------------------------------------|----------|-----------------------------------------------------------------------|
| 2804 | Ccr4                       | chemokine (C-C motif) receptor 4                                                 | 5.61E-03 | NM_009916                                                             |
| 2805 | Tjp2                       | tight junction protein 2                                                         | 5.61E-03 | NM_011597                                                             |
| 2806 | Smn1                       | survival motor neuron 1                                                          | 5.62E-03 | NM_011420                                                             |
| 2807 | Prss23                     | protease, serine, 23                                                             | 5.62E-03 | NM_029614                                                             |
| 2808 | Gm8203 /// H2afz           | predicted gene 8203 /// H2A histone family, member Z                             | 5.63E-03 | NM_016750 /// XM_001000460 /// XM_001480384                           |
| 2809 | Serpib9                    | serine (or cysteine) peptidase inhibitor, clade B, member 9                      | 5.64E-03 | NM_009256                                                             |
| 2810 | Lym5                       | LYR motif containing 5                                                           | 5.65E-03 | NM_001163628 /// NM_133688                                            |
| 2811 | Gm5806 /// Gm9855 /// Tdg  | predicted gene 5806 /// predicted gene 9855 /// thymine DNA glycosylase          | 5.66E-03 | NM_011561 /// NM_172552 /// XM_001479614 /// XM_001479618 /// XM_619  |
| 2812 | Clip4                      | CAP-GLY domain containing linker protein family, member 4                        | 5.67E-03 | NM_030179 /// NM_175378                                               |
| 2813 | Gorasp2                    | golgi reassembly stacking protein 2                                              | 5.69E-03 | NM_027352 /// NR_027343                                               |
| 2814 | Pdgfa                      | platelet derived growth factor, alpha                                            | 5.69E-03 | NM_008808                                                             |
| 2815 | Oas1a                      | 2'-5' oligoadenylate synthetase 1A                                               | 5.69E-03 | NM_145211                                                             |
| 2816 | Col22a1                    | collagen, type XXII, alpha 1                                                     | 5.70E-03 | NM_027174 /// XM_907370 /// XM_981889                                 |
| 2817 | Lsm3                       | LSM3 homolog, U6 small nuclear RNA associated (S. cerevisiae)                    | 5.71E-03 | NM_026309                                                             |
| 2818 | Acbd6                      | acyl-Coenzyme A binding domain containing 6                                      | 5.71E-03 | NM_001145781 /// NM_026683 /// NM_028250                              |
| 2819 | Fgl2                       | fibrinogen-like protein 2                                                        | 5.71E-03 | NM_008013                                                             |
| 2820 | Crip1                      | cysteine-rich protein 1 (intestinal)                                             | 5.72E-03 | NM_007763                                                             |
| 2821 | Vopp1                      | vesicular, overexpressed in cancer, prosurvival protein 1                        | 5.72E-03 | NM_146168                                                             |
| 2822 | Twf1                       | twinfilin, actin-binding protein, homolog 1 (Drosophila)                         | 5.73E-03 | NM_008971                                                             |
| 2823 | Snrnp48                    | small nuclear ribonucleoprotein 48 (U11/U12)                                     | 5.73E-03 | NM_026382                                                             |
| 2824 | Sh3bgrl                    | SH3-binding domain glutamic acid-rich protein like                               | 5.73E-03 | NM_019989                                                             |
| 2825 | 1200009O22Rik              | RIKEN cDNA 1200009O22 gene                                                       | 5.73E-03 | NM_025817                                                             |
| 2826 | Id3                        | inhibitor of DNA binding 3                                                       | 5.73E-03 | NM_008321                                                             |
| 2827 | Cdc37                      | cell division cycle 37 homolog (S. cerevisiae)                                   | 5.75E-03 | NM_016742                                                             |
| 2828 | Tbc1d23                    | TBC1 domain family, member 23                                                    | 5.75E-03 | NM_026254                                                             |
| 2829 | Tmem186                    | transmembrane protein 186                                                        | 5.76E-03 | NM_025708                                                             |
| 2830 | Fkbp1b                     | FK506 binding protein 1b                                                         | 5.76E-03 | NM_016863                                                             |
| 2831 | Urm1                       | ubiquitin related modifier 1 homolog (S. cerevisiae)                             | 5.77E-03 | NM_026615                                                             |
| 2832 | Rundc3a                    | RUN domain containing 3A                                                         | 5.78E-03 | NM_016759                                                             |
| 2833 | Gm9706 /// Isg15           | predicted gene 9706 /// ISG15 ubiquitin-like modifier                            | 5.78E-03 | NM_015783 /// XM_001471685 /// XM_001471686 /// XR_005074 /// XR_034  |
| 2834 | Pppde2                     | PPPDE peptidase domain containing 2                                              | 5.79E-03 | NM_134095                                                             |
| 2835 | Tmem51                     | transmembrane protein 51                                                         | 5.79E-03 | NM_145402                                                             |
| 2836 | Fkbp3                      | FK506 binding protein 3                                                          | 5.80E-03 | NM_013902                                                             |
| 2837 | Hus1                       | Hus1 homolog (S. pombe)                                                          | 5.80E-03 | NM_008316                                                             |
| 2838 | Gda                        | guanine deaminase                                                                | 5.81E-03 | NM_010266                                                             |
| 2839 | Ugdh                       | UDP-glucose dehydrogenase                                                        | 5.81E-03 | NM_009466                                                             |
| 2840 | Nupl2                      | nucleoporin like 2                                                               | 5.82E-03 | NM_153092                                                             |
| 2841 | Baz2a                      | bromodomain adjacent to zinc finger domain, 2A                                   | 5.83E-03 | NM_054078                                                             |
| 2842 | Cwf19l1                    | CWF19-like 1, cell cycle control (S. pombe)                                      | 5.83E-03 | NM_001081077                                                          |
| 2843 | Reep1                      | receptor accessory protein 1                                                     | 5.84E-03 | NM_178608                                                             |
| 2844 | Cmb1                       | carboxymethylenebutenolidase-like (Pseudomonas)                                  | 5.84E-03 | NM_181588                                                             |
| 2845 | Adamts5 /// LOC100048332   | a disintegrin-like and metallopeptidase (reprolysin type) with thrombospondin ty | 5.85E-03 | NM_011782 /// XM_001480027                                            |
| 2846 | Gm11663 /// Gm2992 /// Gm7 | predicted gene 11663 /// predicted gene 2992 /// predicted gene 7862 /// high mo | 5.85E-03 | NM_008251 /// XR_032169 /// XR_032491 /// XR_032933 /// XR_033818 /// |
| 2847 | Gbf1                       | golgi-specific brefeldin A-resistance factor 1                                   | 5.85E-03 | NM_178930                                                             |
| 2848 | Slc25a38                   | solute carrier family 25, member 38                                              | 5.85E-03 | NM_144793                                                             |
| 2849 | Ckmt2                      | creatine kinase, mitochondrial 2                                                 | 5.85E-03 | NM_198415                                                             |

|      |                             |                                                                                  |          |                                                                     |
|------|-----------------------------|----------------------------------------------------------------------------------|----------|---------------------------------------------------------------------|
| 2850 | Pcyox1                      | prenylcysteine oxidase 1                                                         | 5.86E-03 | NM_025823                                                           |
| 2851 | Mapk1                       | mitogen-activated protein kinase 1                                               | 5.87E-03 | NM_001038663 /// NM_011949                                          |
| 2852 | C1qbp                       | complement component 1, q subcomponent binding protein                           | 5.87E-03 | NM_007573                                                           |
| 2853 | Map1lc3b                    | microtubule-associated protein 1 light chain 3 beta                              | 5.87E-03 | NM_026160                                                           |
| 2854 | Myt1l                       | myelin transcription factor 1-like                                               | 5.87E-03 | NM_001093775 /// NM_001093776 /// NM_001093777 /// NM_008666 /// XM |
| 2855 | Lrrk1                       | leucine-rich repeat kinase 1                                                     | 5.88E-03 | NM_146191                                                           |
| 2856 | Scn3a                       | sodium channel, voltage-gated, type III, alpha                                   | 5.88E-03 | NM_018732                                                           |
| 2857 | Syncrip                     | synaptotagmin binding, cytoplasmic RNA interacting protein                       | 5.88E-03 | NM_019666 /// NM_019796                                             |
| 2858 | Ccnd3                       | cyclin D3                                                                        | 5.89E-03 | NM_001081635 /// NM_001081636 /// NM_007632                         |
| 2859 | Cdc73                       | cell division cycle 73, Paf1/RNA polymerase II complex component, homolog (S. ce | 5.89E-03 | NM_145991                                                           |
| 2860 | Slc25a39                    | solute carrier family 25, member 39                                              | 5.89E-03 | NM_026542                                                           |
| 2861 | LOC631302 /// Pqbp1         | similar to polyglutamine binding protein 1 /// polyglutamine binding protein 1   | 5.90E-03 | NM_019478 /// XM_919383                                             |
| 2862 | Errf1                       | ERBB receptor feedback inhibitor 1                                               | 5.90E-03 | NM_133753                                                           |
| 2863 | 1110059G10Rik               | RIKEN cDNA 1110059G10 gene                                                       | 5.90E-03 | NM_025419                                                           |
| 2864 | 4933411G06Rik               | RIKEN cDNA 4933411G06 gene                                                       | 5.90E-03 | XM_621219 /// XM_911175                                             |
| 2865 | Cnn3 /// LOC100047856       | calponin 3, acidic /// similar to calponin 3, acidic                             | 5.92E-03 | NM_028044 /// XM_001479297                                          |
| 2866 | Vrk3                        | vaccinia related kinase 3                                                        | 5.92E-03 | NM_133945                                                           |
| 2867 | Ipo4                        | importin 4                                                                       | 5.93E-03 | NM_024267                                                           |
| 2868 | Bcat1                       | branched chain aminotransferase 1, cytosolic                                     | 5.93E-03 | NM_001024468 /// NM_007532                                          |
| 2869 | Plod2                       | procollagen lysine, 2-oxoglutarate 5-dioxygenase 2                               | 5.94E-03 | NM_001142916 /// NM_011961                                          |
| 2870 | Emp1                        | epithelial membrane protein 1                                                    | 5.94E-03 | NM_010128                                                           |
| 2871 | Matn4                       | matrilin 4                                                                       | 5.95E-03 | NM_013592                                                           |
| 2872 | Inpp5b                      | inositol polyphosphate-5-phosphatase B                                           | 5.96E-03 | NM_008385                                                           |
| 2873 | Acbd3                       | acyl-Coenzyme A binding domain containing 3                                      | 5.96E-03 | NM_133225                                                           |
| 2874 | Sae1                        | SUMO1 activating enzyme subunit 1                                                | 5.97E-03 | NM_019748                                                           |
| 2875 | Guca1a                      | guanylate cyclase activator 1a (retina)                                          | 5.97E-03 | NM_008189                                                           |
| 2876 | Myoc                        | myocilin                                                                         | 5.98E-03 | NM_010865                                                           |
| 2877 | Thoc3                       | THO complex 3                                                                    | 5.98E-03 | NM_028597                                                           |
| 2878 | Pitpnc1                     | phosphatidylinositol transfer protein, cytoplasmic 1                             | 5.99E-03 | NM_145823                                                           |
| 2879 | Pros1                       | protein S (alpha)                                                                | 6.00E-03 | NM_011173                                                           |
| 2880 | Matn2                       | matrilin 2                                                                       | 6.00E-03 | NM_016762                                                           |
| 2881 | Ilfg1                       | integrin alpha FG-GAP repeat containing 1                                        | 6.01E-03 | NM_028007                                                           |
| 2882 | Usp24                       | ubiquitin specific peptidase 24                                                  | 6.01E-03 | XM_001473472 /// XM_001479517 /// XM_001481281 /// XM_915524        |
| 2883 | Fzd7                        | frizzled homolog 7 (Drosophila)                                                  | 6.02E-03 | NM_008057                                                           |
| 2884 | Kctd20                      | potassium channel tetramerisation domain containing 20                           | 6.04E-03 | NM_025888                                                           |
| 2885 | Mtap4                       | microtubule-associated protein 4                                                 | 6.05E-03 | NM_008633                                                           |
| 2886 | Kif1b                       | kinesin family member 1B                                                         | 6.06E-03 | NM_008441 /// NM_207682                                             |
| 2887 | Mfsd5                       | major facilitator superfamily domain containing 5                                | 6.07E-03 | NM_134100                                                           |
| 2888 | Cox7c /// Gm10012 /// Gm338 | cytochrome c oxidase, subunit VIIc /// cytochrome c oxidase, subunit VIIc pseudo | 6.07E-03 | NM_007749 /// NR_028042 /// XM_001477253 /// XM_001477263 /// XM_00 |
| 2889 | LOC100047619 /// Slc7a5     | similar to solute carrier family 7 (cationic amino acid transporter, y+ system), | 6.08E-03 | NM_011404 /// XR_033736                                             |
| 2890 | Vps11                       | vacuolar protein sorting 11 (yeast)                                              | 6.11E-03 | NM_027889                                                           |
| 2891 | LOC100047492 /// Stk11ip    | similar to serine/threonine kinase 11 interacting protein /// serine/threonine k | 6.13E-03 | NM_027886 /// XM_001478275                                          |
| 2892 | Syngn2                      | synaptogyrin 2                                                                   | 6.13E-03 | NM_009304                                                           |
| 2893 | Irf6                        | interferon regulatory factor 6                                                   | 6.14E-03 | NM_016851                                                           |
| 2894 | Nrip1                       | nuclear receptor interacting protein 1                                           | 6.14E-03 | NM_173440                                                           |
| 2895 | Hlnfp /// LOC100045760      | histone H4 transcription factor /// similar to MBD2-Interacting zinc finger      | 6.15E-03 | NM_172162 /// XM_001474880                                          |

|      |                         |                                                                                  |          |                                                           |
|------|-------------------------|----------------------------------------------------------------------------------|----------|-----------------------------------------------------------|
| 2896 | Havcr2                  | hepatitis A virus cellular receptor 2                                            | 6.16E-03 | NM_134250                                                 |
| 2897 | Tpi1                    | triosephosphate isomerase 1                                                      | 6.17E-03 | NM_009415                                                 |
| 2898 | Sfpq                    | splicing factor proline/glutamine rich (polypyrimidine tract binding protein ass | 6.18E-03 | NM_023603                                                 |
| 2899 | Rpgrip1                 | retinitis pigmentosa GTPase regulator interacting protein 1                      | 6.18E-03 | NM_023879                                                 |
| 2900 | Ccl11                   | chemokine (C-C motif) ligand 11                                                  | 6.18E-03 | NM_011330                                                 |
| 2901 | Thoc2                   | THO complex 2                                                                    | 6.19E-03 | NM_001033422                                              |
| 2902 | Ptprk                   | protein tyrosine phosphatase, receptor type, K                                   | 6.19E-03 | NM_008983                                                 |
| 2903 | Mettl6                  | methyltransferase like 6                                                         | 6.19E-03 | NM_025907                                                 |
| 2904 | ---                     | ---                                                                              | 6.19E-03 | ---                                                       |
| 2905 | Grtp1                   | GH regulated TBC protein 1                                                       | 6.19E-03 | NM_025768                                                 |
| 2906 | Hmgcl                   | 3-hydroxy-3-methylglutaryl-Coenzyme A lyase                                      | 6.20E-03 | NM_008254                                                 |
| 2907 | Gh                      | growth hormone                                                                   | 6.23E-03 | NM_008117                                                 |
| 2908 | Ola1                    | Obg-like ATPase 1                                                                | 6.23E-03 | NM_025942 /// NM_030091                                   |
| 2909 | Sntb2                   | syntrophin, basic 2                                                              | 6.23E-03 | NM_009229                                                 |
| 2910 | Adi1                    | acireductone dioxygenase 1                                                       | 6.24E-03 | NM_134052                                                 |
| 2911 | Clptm1l                 | CLPTM1-like                                                                      | 6.24E-03 | NM_146047                                                 |
| 2912 | Hsd17b2                 | hydroxysteroid (17-beta) dehydrogenase 2                                         | 6.25E-03 | NM_008290                                                 |
| 2913 | Mrpl18                  | mitochondrial ribosomal protein L18                                              | 6.26E-03 | NM_026310                                                 |
| 2914 | Snap23                  | synaptosomal-associated protein 23                                               | 6.26E-03 | NM_009222                                                 |
| 2915 | Gmppa                   | GDP-mannose pyrophosphorylase A                                                  | 6.27E-03 | NM_133708                                                 |
| 2916 | Psrc1                   | proline/serine-rich coiled-coil 1                                                | 6.27E-03 | NM_019976                                                 |
| 2917 | Snx15                   | sorting nexin 15                                                                 | 6.27E-03 | NM_026912                                                 |
| 2918 | Mia3                    | melanoma inhibitory activity 3                                                   | 6.27E-03 | NM_177389                                                 |
| 2919 | AA408650                | expressed sequence AA408650                                                      | 6.27E-03 | ---                                                       |
| 2920 | Creg1                   | cellular repressor of E1A-stimulated genes 1                                     | 6.28E-03 | NM_011804                                                 |
| 2921 | Ptp4a1                  | protein tyrosine phosphatase 4a1                                                 | 6.28E-03 | NM_011200                                                 |
| 2922 | Limd2                   | LIM domain containing 2                                                          | 6.28E-03 | NM_172397                                                 |
| 2923 | Ranbp10                 | RAN binding protein 10                                                           | 6.29E-03 | NM_145824                                                 |
| 2924 | LOC100046080 /// Spin1  | similar to Spindlin 1 /// spindlin 1                                             | 6.30E-03 | NM_011462 /// NM_146043 /// XM_001475418 /// XM_001475434 |
| 2925 | Fam103a1                | family with sequence similarity 103, member A1                                   | 6.30E-03 | NM_025997                                                 |
| 2926 | Trim32                  | tripartite motif-containing 32                                                   | 6.30E-03 | NM_001161782 /// NM_053084                                |
| 2927 | Gngt1                   | guanine nucleotide binding protein (G protein), gamma transducing activity polyp | 6.31E-03 | NM_010314                                                 |
| 2928 | Dio2                    | deiodinase, iodothyronine, type II                                               | 6.32E-03 | NM_010050                                                 |
| 2929 | Mapre3                  | microtubule-associated protein, RP/EB family, member 3                           | 6.32E-03 | NM_133350                                                 |
| 2930 | Sf3b1                   | splicing factor 3b, subunit 1                                                    | 6.32E-03 | NM_031179                                                 |
| 2931 | Thoc1                   | THO complex 1                                                                    | 6.33E-03 | NM_153552                                                 |
| 2932 | Shoc2                   | soc-2 (suppressor of clear) homolog (C. elegans)                                 | 6.33E-03 | NM_019658                                                 |
| 2933 | Midn                    | midnolin                                                                         | 6.34E-03 | NM_021565                                                 |
| 2934 | A030009H04Rik           | RIKEN cDNA A030009H04 gene                                                       | 6.34E-03 | NM_020591 /// NR_027827                                   |
| 2935 | ---                     | ---                                                                              | 6.34E-03 | ---                                                       |
| 2936 | Pdlim5                  | PDZ and LIM domain 5                                                             | 6.35E-03 | NM_019808 /// NM_019809 /// NM_022554                     |
| 2937 | LOC100047046 /// Mogat1 | similar to monoacylglycerol O-acyltransferase 1 /// monoacylglycerol O-acyltrans | 6.35E-03 | NM_026713 /// XM_001477283                                |
| 2938 | Zeb1                    | zinc finger E-box binding homeobox 1                                             | 6.36E-03 | NM_011546                                                 |
| 2939 | Yipf2                   | Yip1 domain family, member 2                                                     | 6.36E-03 | NM_138303                                                 |
| 2940 | Slc39a11                | solute carrier family 39 (metal ion transporter), member 11                      | 6.36E-03 | NM_027216                                                 |
| 2941 | Erap1                   | endoplasmic reticulum aminopeptidase 1                                           | 6.36E-03 | NM_030711                                                 |



|      |                        |                                                                                |          |                                                                     |
|------|------------------------|--------------------------------------------------------------------------------|----------|---------------------------------------------------------------------|
| 2942 | Pla1a                  | phospholipase A1 member A                                                      | 6.37E-03 | NM_134102                                                           |
| 2943 | Ptprb                  | protein tyrosine phosphatase, receptor type, B                                 | 6.38E-03 | NM_029928                                                           |
| 2944 | Arih1                  | ariadne ubiquitin-conjugating enzyme E2 binding protein homolog 1 (Drosophila) | 6.41E-03 | NM_019927                                                           |
| 2945 | Hcfc1r1                | host cell factor C1 regulator 1 (XPO1-dependent)                               | 6.41E-03 | NM_181821                                                           |
| 2946 | Cxcl10                 | chemokine (C-X-C motif) ligand 10                                              | 6.41E-03 | NM_021274                                                           |
| 2947 | Nr4a2                  | nuclear receptor subfamily 4, group A, member 2                                | 6.41E-03 | NM_001139509 /// NM_013613                                          |
| 2948 | Camk1                  | calcium/calmodulin-dependent protein kinase I                                  | 6.43E-03 | NM_133926                                                           |
| 2949 | Aebp1                  | AE binding protein 1                                                           | 6.43E-03 | NM_009636                                                           |
| 2950 | Lrrc51                 | Leucine rich repeat containing 51                                              | 6.44E-03 | NM_001162973 /// NM_001162974 /// NM_027053 /// XM_890234 /// XM_90 |
| 2951 | Suv420h1               | suppressor of variegation 4-20 homolog 1 (Drosophila)                          | 6.44E-03 | NM_144871                                                           |
| 2952 | 2810449G22Rik          | RIKEN cDNA 2810449G22 gene                                                     | 6.44E-03 | ---                                                                 |
| 2953 | Hexb                   | hexosaminidase B                                                               | 6.45E-03 | NM_010422                                                           |
| 2954 | Mlx                    | MAX-like protein X                                                             | 6.45E-03 | NM_001159384 /// NM_001159385 /// NM_011550                         |
| 2955 | ---                    | ---                                                                            | 6.46E-03 | ---                                                                 |
| 2956 | Mapre1                 | microtubule-associated protein, RP/EB family, member 1                         | 6.47E-03 | NM_007896                                                           |
| 2957 | LOC100046746 /// Smap1 | similar to SMAP1 /// stromal membrane-associated protein 1                     | 6.48E-03 | NM_028534 /// XM_001476743                                          |
| 2958 | Ppp2r4                 | protein phosphatase 2A, regulatory subunit B (PR 53)                           | 6.49E-03 | NM_138748                                                           |
| 2959 | Rpl7l1                 | ribosomal protein L7-like 1                                                    | 6.50E-03 | NM_025433                                                           |
| 2960 | Gabbr1                 | gamma-aminobutyric acid (GABA) B receptor, 1                                   | 6.51E-03 | NM_019439                                                           |
| 2961 | C1qc                   | complement component 1, q subcomponent, C chain                                | 6.51E-03 | NM_007574                                                           |
| 2962 | Usp16                  | ubiquitin specific peptidase 16                                                | 6.52E-03 | NM_024258                                                           |
| 2963 | Unc119b                | unc-119 homolog B (C. elegans)                                                 | 6.52E-03 | NM_175352                                                           |

**Table S2.** Differentially expressed genes in Study 1 PC samples revealed by BETR

| No. | Gene Symbol           | Gene Title                                                                       | RefSeq ID                                                                     |
|-----|-----------------------|----------------------------------------------------------------------------------|-------------------------------------------------------------------------------|
| 1   | 1190002H23RIK         | :RIKEN cDNA 1190002H23 gene                                                      | NM_025427                                                                     |
| 2   | 1810009A15RIK         | :RIKEN cDNA 1810009A15 gene                                                      | NM_025463                                                                     |
| 3   | 2010107G23RIK         | :RIKEN cDNA 2010107G23 gene                                                      | NM_027251                                                                     |
| 4   | 2310061J03RIK         | :RIKEN cDNA 2310061J03 gene                                                      | NM_133677 /// NR_027965                                                       |
| 5   | 2610018G03RIK         | :RIKEN cDNA 2610018G03 gene                                                      | NM_133729                                                                     |
| 6   | 5730403B10RIK         | :RIKEN cDNA 5730403B10 gene                                                      | NM_025670                                                                     |
| 7   | 5730403B10RIK         | :RIKEN cDNA 5730403B10 gene                                                      | NM_025670                                                                     |
| 8   | 6720475J19RIK         | :RIKEN cDNA 6720475J19 gene                                                      | XM_001474896 /// XM_001481296                                                 |
| 9   | 9530028C05            | :hypothetical protein 9530028C05                                                 | ---                                                                           |
| 10  | Abca8b                | :ATP-binding cassette, sub-family A (ABC1), member 8b                            | NM_013851                                                                     |
| 11  | Abhd14a               | :abhydrolase domain containing 14A                                               | NM_001110271 /// NM_001110272 /// NM_145919                                   |
| 12  | Acs1l                 | :acyl-CoA synthetase long-chain family member 1                                  | NM_007981                                                                     |
| 13  | Adpgk                 | :ADP-dependent glucokinase                                                       | NM_028121                                                                     |
| 14  | Aldh1a2               | :aldehyde dehydrogenase family 1, subfamily A2                                   | NM_009022                                                                     |
| 15  | Antxr2                | :anthrax toxin receptor 2                                                        | NM_133738                                                                     |
| 16  | Arhgap6               | :Rho GTPase activating protein 6                                                 | NM_009707 /// NM_178754                                                       |
| 17  | Asb4                  | :ankyrin repeat and SOCS box-containing 4                                        | NM_023048                                                                     |
| 18  | Asb4                  | :ankyrin repeat and SOCS box-containing 4                                        | NM_023048                                                                     |
| 19  | Bcl11a                | :B-cell CLL/lymphoma 11A (zinc finger protein)                                   | NM_001159289 /// NM_001159290 /// NM_016707                                   |
| 20  | Bcl2l1                | :BCL2-like 1                                                                     | NM_009743                                                                     |
| 21  | C1s /// LOC100044326  | :complement component 1, s subcomponent /// similar to Complement component 1, s | NM_001097617 /// NM_144938 /// XR_030514                                      |
| 22  | C3                    | :complement component 3                                                          | NM_009778                                                                     |
| 23  | C4bp                  | :complement component 4 binding protein                                          | NM_007576                                                                     |
| 24  | Car15                 | :carbonic anhydrase 15                                                           | NM_030558                                                                     |
| 25  | Car3                  | :carbonic anhydrase 3                                                            | NM_007606                                                                     |
| 26  | Cat                   | :catalase                                                                        | NM_009804                                                                     |
| 27  | Cbr2                  | :carbonyl reductase 2                                                            | NM_007621                                                                     |
| 28  | Cbx1                  | :chromobox homolog 1 (Drosophila HP1 beta)                                       | NM_007622                                                                     |
| 29  | Cbx1                  | :chromobox homolog 1 (Drosophila HP1 beta)                                       | NM_007622                                                                     |
| 30  | Ccdc23                | :coiled-coil domain containing 23                                                | NM_001038998 /// NM_024462                                                    |
| 31  | Ccdc80                | :coiled-coil domain containing 80                                                | NM_026439                                                                     |
| 32  | Ccl8                  | :chemokine (C-C motif) ligand 8                                                  | NM_021443 /// XM_001480890                                                    |
| 33  | Ccl9                  | :chemokine (C-C motif) ligand 9                                                  | NM_011338                                                                     |
| 34  | Ccp1                  | :cell cycle progression 1                                                        | NM_001114328 /// NM_028181                                                    |
| 35  | Cd163                 | :CD163 antigen                                                                   | NM_053094                                                                     |
| 36  | Cd36                  | :CD36 antigen                                                                    | NM_001159555 /// NM_001159556 /// NM_001159557 /// NM_001159558 /// NM_007643 |
| 37  | Cd36                  | :CD36 antigen                                                                    | NM_001159555 /// NM_001159556 /// NM_001159557 /// NM_001159558 /// NM_007643 |
| 38  | Cd47                  | :CD47 antigen (Rh-related antigen, integrin-associated signal transducer)        | NM_010581                                                                     |
| 39  | Cdcp1                 | :CUB domain containing protein 1                                                 | NM_133974                                                                     |
| 40  | Ch25h                 | :cholesterol 25-hydroxylase                                                      | NM_009890                                                                     |
| 41  | Cklf                  | :chemokine-like factor                                                           | NM_001037841 /// NM_029295                                                    |
| 42  | Cnn3 /// LOC100047856 | :calponin 3, acidic /// similar to calponin 3, acidic                            | NM_028044 /// XM_001479297                                                    |
| 43  | Col14a1               | :collagen, type XIV, alpha 1                                                     | NM_181277                                                                     |

|    |                                  |                                                                                   |                                                        |
|----|----------------------------------|-----------------------------------------------------------------------------------|--------------------------------------------------------|
| 44 | Col3a1                           | :collagen, type III, alpha 1                                                      | NM_009930                                              |
| 45 | Col6a1                           | :collagen, type VI, alpha 1                                                       | NM_009933                                              |
| 46 | Col6a2                           | :collagen, type VI, alpha 2                                                       | NM_146007                                              |
| 47 | Colec12                          | :collectin sub-family member 12                                                   | NM_130449                                              |
| 48 | Ctsb                             | :cathepsin B                                                                      | NM_007798                                              |
| 49 | Ctsc                             | :cathepsin C                                                                      | NM_009982                                              |
| 50 | Ctse                             | :cathepsin E                                                                      | NM_007799                                              |
| 51 | Cxcl12                           | :chemokine (C-X-C motif) ligand 12                                                | NM_001012477 /// NM_013655 /// NM_021704               |
| 52 | Cxcl12                           | :chemokine (C-X-C motif) ligand 12                                                | NM_001012477 /// NM_013655 /// NM_021704               |
| 53 | Cxxc5                            | :CXXC finger 5                                                                    | NM_133687                                              |
| 54 | Cxxc5                            | :CXXC finger 5                                                                    | NM_133687                                              |
| 55 | Cyp1b1                           | :cytochrome P450, family 1, subfamily b, polypeptide 1                            | NM_009994                                              |
| 56 | Cyp27a1                          | :cytochrome P450, family 27, subfamily a, polypeptide 1                           | NM_024264                                              |
| 57 | Cyp2b10                          | :cytochrome P450, family 2, subfamily b, polypeptide 10                           | NM_009998 /// NM_009999                                |
| 58 | Cyp4v3                           | :cytochrome P450, family 4, subfamily v, polypeptide 3                            | NM_133969                                              |
| 59 | Dap                              | :death-associated protein                                                         | NM_146057                                              |
| 60 | Dcn                              | :decorin                                                                          | NM_007833                                              |
| 61 | Degs1                            | :degenerative spermatocyte homolog 1 (Drosophila)                                 | NM_007853                                              |
| 62 | Degs1                            | :degenerative spermatocyte homolog 1 (Drosophila)                                 | NM_007853                                              |
| 63 | Dek                              | :DEK oncogene (DNA binding)                                                       | NM_025900                                              |
| 64 | Dnmt3a                           | :DNA methyltransferase 3A                                                         | NM_007872 /// NM_153743                                |
| 65 | Dpt                              | :dermatopontin                                                                    | NM_019759                                              |
| 66 | Dsp                              | :desmoplakin                                                                      | NM_023842 /// XM_001481272 /// XM_621314 /// XM_896350 |
| 67 | Dyrk1a                           | :dual-specificity tyrosine-(Y)-phosphorylation regulated kinase 1a                | NM_001113389 /// NM_007890                             |
| 68 | Ear1 /// Ear12 /// Ear2 /// Ear3 | :eosinophil-associated, ribonuclease A family, member 1 /// eosinophil-associated | NM_001012766 /// NM_007894 /// NM_007895 /// NM_017388 |
| 69 | Ear2                             | :eosinophil-associated, ribonuclease A family, member 2                           | NM_007895                                              |
| 70 | Efemp1                           | :epidermal growth factor-containing fibulin-like extracellular matrix protein 1   | NM_146015                                              |
| 71 | Egln1                            | :EGL nine homolog 1 (C. elegans)                                                  | NM_053207                                              |
| 72 | Elf4e3                           | :eukaryotic translation initiation factor 4E member 3                             | NM_025829                                              |
| 73 | Emb                              | :embigin                                                                          | NM_010330                                              |
| 74 | Emb                              | :embigin                                                                          | NM_010330                                              |
| 75 | Enpp2                            | :ectonucleotide pyrophosphatase/phosphodiesterase 2                               | NM_001136077 /// NM_015744                             |
| 76 | Entpd1                           | :ectonucleoside triphosphate diphosphohydrolase 1                                 | NM_009848                                              |
| 77 | Epha8                            | :Eph receptor A8                                                                  | NM_007939                                              |
| 78 | Extl2                            | :exostoses (multiple)-like 2                                                      | NM_001163514 /// NM_001163515 /// NM_021388            |
| 79 | Extl2                            | :exostoses (multiple)-like 2                                                      | NM_001163514 /// NM_001163515 /// NM_021388            |
| 80 | F13a1                            | :coagulation factor XIII, A1 subunit                                              | NM_028784                                              |
| 81 | Fabp4                            | :fatty acid binding protein 4, adipocyte                                          | NM_024406                                              |
| 82 | Fabp4                            | :fatty acid binding protein 4, adipocyte                                          | NM_024406                                              |
| 83 | Fbn1                             | :fibrillin 1                                                                      | NM_007993                                              |
| 84 | Fbxo28                           | :F-box protein 28                                                                 | NM_175127                                              |
| 85 | Fcgr3                            | :Fc receptor, IgG, low affinity III                                               | NM_010188                                              |
| 86 | Fhl1                             | :four and a half LIM domains 1                                                    | NM_001077361 /// NM_001077362 /// NM_010211            |
| 87 | Fmod                             | :fibromodulin                                                                     | NM_021355                                              |
| 88 | Frmd6                            | :FERM domain containing 6                                                         | NM_028127                                              |
| 89 | G0s2                             | :G0/G1 switch gene 2                                                              | NM_008059                                              |

|     |                                         |                                                                                              |                                                                                  |
|-----|-----------------------------------------|----------------------------------------------------------------------------------------------|----------------------------------------------------------------------------------|
| 90  | Gbp2                                    | :guanylate binding protein 2                                                                 | NM_010260                                                                        |
| 91  | Gbp2                                    | :guanylate binding protein 2                                                                 | NM_010260                                                                        |
| 92  | Gfra3 /// LOC100045484                  | :glial cell line derived neurotrophic factor family receptor alpha 3 /// similar             | NM_010280 /// XM_001474380                                                       |
| 93  | Gm11793 /// Hnrnpf                      | :predicted gene 11793 /// heterogeneous nuclear ribonucleoprotein F                          | NM_133834 /// XR_002079 /// XR_034451                                            |
| 94  | Gm5529 /// Gm5560 /// Gm6159            | :predicted gene 5529 /// predicted gene 5560 /// predicted gene 6425 /// predicted gene 6159 | NM_001081233 /// NM_007451 /// XM_484885 /// XM_887851 /// XM_904056 /// XM_9076 |
| 95  | Gm5560 /// Gm8429 /// Slc22a1           | :predicted gene 5560 /// predicted gene 8429 /// solute carrier family 25 (mitochondrial)    | NM_001081233 /// NM_007451 /// XR_033177                                         |
| 96  | Gm6159 /// Hnrnpf                       | :predicted gene 6159 /// heterogeneous nuclear ribonucleoprotein R                           | NM_028871 /// XR_030753                                                          |
| 97  | Gm9844 /// Tmsb10                       | :predicted gene 9844 /// thymosin, beta 10                                                   | NM_001039392 /// NM_025284 /// XM_001478515 /// XM_001480801                     |
| 98  | Gnai1                                   | :guanine nucleotide binding protein (G protein), alpha inhibiting 1                          | NM_010305                                                                        |
| 99  | Gns                                     | :glucosamine (N-acetyl)-6-sulfatase                                                          | NM_029364                                                                        |
| 100 | Golm1                                   | :golgi membrane protein 1                                                                    | NM_001035122 /// NM_027307                                                       |
| 101 | Gp49a /// Liltrb4                       | :glycoprotein 49 A /// leukocyte immunoglobulin-like receptor, subfamily B, member 4         | NM_008147 /// NM_013532                                                          |
| 102 | Gpatch8                                 | :G patch domain containing 8                                                                 | NM_001159492 /// XM_152907 /// XM_895150 /// XM_903059 /// XM_903060 /// XM_9030 |
| 103 | Gpnmb                                   | :glycoprotein (transmembrane) nmb                                                            | NM_053110                                                                        |
| 104 | Gpr137b                                 | :G protein-coupled receptor 137B                                                             | NM_031999                                                                        |
| 105 | Gpr137b /// Gpr137b-ps /// LOC100045484 | :G protein-coupled receptor 137B /// G protein-coupled receptor 137B, pseudogene             | NM_031999 /// NR_003568 /// XM_001473441 /// XR_001658                           |
| 106 | Gpr137b-ps                              | :G protein-coupled receptor 137B, pseudogene                                                 | NR_003568 /// XR_001658                                                          |
| 107 | Gpr19                                   | :G protein-coupled receptor 19                                                               | NM_008157                                                                        |
| 108 | Gpx8                                    | :glutathione peroxidase 8 (putative)                                                         | NM_027127                                                                        |
| 109 | Grem2                                   | :gremlin 2 homolog, cysteine knot superfamily (Xenopus laevis)                               | NM_011825                                                                        |
| 110 | Gsn                                     | :gelsolin                                                                                    | NM_146120                                                                        |
| 111 | Gsn                                     | :gelsolin                                                                                    | NM_146120                                                                        |
| 112 | Gsp12                                   | :G1 to S phase transition 2                                                                  | NM_008179                                                                        |
| 113 | Gsta4                                   | :glutathione S-transferase, alpha 4                                                          | NM_010357                                                                        |
| 114 | Gstt1                                   | :glutathione S-transferase, theta 1                                                          | NM_008185                                                                        |
| 115 | Hells                                   | :helicase, lymphoid specific                                                                 | NM_008234                                                                        |
| 116 | Hmgn3                                   | :high mobility group nucleosomal binding domain 3                                            | NM_026122 /// NM_175074                                                          |
| 117 | Hnrnpu                                  | :heterogeneous nuclear ribonucleoprotein U                                                   | NM_016805                                                                        |
| 118 | Hoxc4                                   | :homeo box C4                                                                                | NM_013553                                                                        |
| 119 | Hrh1 /// LOC100041871                   | :histamine receptor H1 /// similar to histamine receptor H1                                  | NM_008285 /// XR_031594                                                          |
| 120 | Htra1                                   | :HtrA serine peptidase 1                                                                     | NM_019564                                                                        |
| 121 | Ica1                                    | :islet cell autoantigen 1                                                                    | NM_010492                                                                        |
| 122 | Ick                                     | :intestinal cell kinase                                                                      | NM_001163780 /// NM_019987                                                       |
| 123 | Ifi203                                  | :interferon activated gene 203                                                               | NM_001045481 /// NM_008328                                                       |
| 124 | Ifi203                                  | :interferon activated gene 203                                                               | NM_001045481 /// NM_008328                                                       |
| 125 | Ifi205 /// Mnda                         | :interferon activated gene 205 /// myeloid cell nuclear differentiation antigen              | NM_001033450 /// NM_172648                                                       |
| 126 | Igf1                                    | :insulin-like growth factor 1                                                                | NM_001111274 /// NM_001111275 /// NM_001111276 /// NM_010512 /// NM_184052       |
| 127 | Igf1                                    | :insulin-like growth factor 1                                                                | NM_001111274 /// NM_001111275 /// NM_001111276 /// NM_010512 /// NM_184052       |
| 128 | Igh /// Ighg                            | :immunoglobulin heavy chain complex /// Immunoglobulin heavy chain (gamma polypeptide)       | XM_001472541                                                                     |
| 129 | Igh-6                                   | :immunoglobulin heavy chain 6 (heavy chain of IgM)                                           | ---                                                                              |
| 130 | Igh-6                                   | :immunoglobulin heavy chain 6 (heavy chain of IgM)                                           | ---                                                                              |
| 131 | Igk-V1                                  | :immunoglobulin kappa chain variable 1 (V1)                                                  | ---                                                                              |
| 132 | Igl-V1                                  | :immunoglobulin lambda chain, variable 1                                                     | ---                                                                              |
| 133 | Il2rg                                   | :interleukin 2 receptor, gamma chain                                                         | NM_013563                                                                        |
| 134 | Il7r                                    | :interleukin 7 receptor                                                                      | NM_008372                                                                        |
| 135 | Impad1                                  | :inositol monophosphatase domain containing 1                                                | NM_177730                                                                        |

|     |                           |                                                                                   |                                                                                 |
|-----|---------------------------|-----------------------------------------------------------------------------------|---------------------------------------------------------------------------------|
| 136 | Itga6                     | :integrin alpha 6                                                                 | NM_008397                                                                       |
| 137 | Itga9                     | :integrin alpha 9                                                                 | NM_001113514 /// NM_133721                                                      |
| 138 | Itih5                     | :inter-alpha (globulin) inhibitor H5                                              | NM_172471                                                                       |
| 139 | Jund                      | :Jun proto-oncogene related gene d                                                | NM_010592                                                                       |
| 140 | Kdm5b                     | :lysine (K)-specific demethylase 5B                                               | NM_152895                                                                       |
| 141 | Klhl13                    | :kelch-like 13 (Drosophila)                                                       | NM_026167                                                                       |
| 142 | Klhl22                    | :kelch-like 22 (Drosophila)                                                       | NM_145479 /// XM_001475578 /// XM_001478907                                     |
| 143 | Klk1                      | :kallikrein 1                                                                     | NM_010639                                                                       |
| 144 | Klk1                      | :kallikrein 1                                                                     | NM_010639                                                                       |
| 145 | Klk1b22 /// Klk1b9        | :kallikrein 1-related peptidase b22 /// kallikrein 1-related peptidase b9         | NM_010114 /// NM_010116                                                         |
| 146 | Klra17                    | :killer cell lectin-like receptor, subfamily A, member 17                         | NM_133203                                                                       |
| 147 | Lcp1                      | :lymphocyte cytosolic protein 1                                                   | NM_008879                                                                       |
| 148 | Lgals3                    | :lectin, galactose binding, soluble 3                                             | NM_001145953 /// NM_010705                                                      |
| 149 | Lifr                      | :leukemia inhibitory factor receptor                                              | NM_001113386 /// NM_013584                                                      |
| 150 | LOC100038746              | :hypothetical LOC100038746                                                        | ---                                                                             |
| 151 | LOC100045999 /// LOC64020 | :similar to RAN, member RAS oncogene family /// similar to RAN, member RAS oncoge | NM_009391 /// XM_001475422 /// XR_034742                                        |
| 152 | LOC664787                 | :similar to Sp110 nuclear body protein                                            | XR_030524                                                                       |
| 153 | Lpl                       | :lipoprotein lipase                                                               | NM_008509                                                                       |
| 154 | Lrrrip1                   | :leucine rich repeat (in FLII) interacting protein 1                              | NM_001111311 /// NM_001111312 /// NM_008515                                     |
| 155 | Ly6d                      | :lymphocyte antigen 6 complex, locus D                                            | NM_010742                                                                       |
| 156 | Lyz2                      | :lysozyme 2                                                                       | NM_017372                                                                       |
| 157 | Man1a2                    | :mannosidase, alpha, class 1A, member 2                                           | NM_010763                                                                       |
| 158 | Map4k4                    | :mitogen-activated protein kinase kinase kinase 4                                 | NM_008696                                                                       |
| 159 | Mat2a                     | :methionine adenosyltransferase II, alpha                                         | NM_145569                                                                       |
| 160 | Matn2                     | :matrilin 2                                                                       | NM_016762                                                                       |
| 161 | Meg3                      | :maternally expressed 3                                                           | NR_003633 /// NR_027651 /// NR_027652 /// XR_035480 /// XR_035483 /// XR_035484 |
| 162 | Metap2                    | :methionine aminopeptidase 2                                                      | NM_019648                                                                       |
| 163 | Mfsd4                     | :major facilitator superfamily domain containing 4                                | NM_001114662 /// NM_172510                                                      |
| 164 | Mgst1                     | :microsomal glutathione S-transferase 1                                           | NM_019946                                                                       |
| 165 | Mpeg1                     | :macrophage expressed gene 1                                                      | NM_010821                                                                       |
| 166 | Mrc1                      | :mannose receptor, C type 1                                                       | NM_008625                                                                       |
| 167 | Ms4a6d                    | :membrane-spanning 4-domains, subfamily A, member 6D                              | NM_026835                                                                       |
| 168 | Nav2                      | :neuron navigator 2                                                               | NM_001111016 /// NM_175272                                                      |
| 169 | Ndn                       | :necdin                                                                           | NM_010882                                                                       |
| 170 | Ndn                       | :necdin                                                                           | NM_010882                                                                       |
| 171 | Ndn                       | :necdin                                                                           | NM_010882                                                                       |
| 172 | Ndn                       | :necdin                                                                           | NM_010882                                                                       |
| 173 | Ndst1                     | :N-deacetylase/N-sulfotransferase (heparan glucosaminyl) 1                        | NM_008306                                                                       |
| 174 | Ndufa5                    | :NADH dehydrogenase (ubiquinone) 1 alpha subcomplex, 5                            | NM_026614                                                                       |
| 175 | Ndufv3                    | :NADH dehydrogenase (ubiquinone) flavoprotein 3                                   | NM_001083891 /// NM_030087                                                      |
| 176 | Nek7                      | :NIMA (never in mitosis gene a)-related expressed kinase 7                        | NM_021605                                                                       |
| 177 | Neurog3                   | :neurogenin 3                                                                     | NM_009719                                                                       |
| 178 | Nrp1                      | :neuropilin 1                                                                     | NM_008737                                                                       |
| 179 | Nrp1                      | :neuropilin 1                                                                     | NM_008737                                                                       |
| 180 | Nts                       | :neurotensin                                                                      | NM_024435                                                                       |
| 181 | Nucb2                     | :nucleobindin 2                                                                   | NM_001130479 /// NM_016773                                                      |

|     |          |                                                                                   |                                                                                  |
|-----|----------|-----------------------------------------------------------------------------------|----------------------------------------------------------------------------------|
| 182 | Ogn      | :osteoglycin                                                                      | NM_008760                                                                        |
| 183 | Orc6l    | :origin recognition complex, subunit 6-like (S. cerevisiae)                       | NM_001163791 /// NM_019716 /// NR_028268                                         |
| 184 | Osbpl1a  | :oxysterol binding protein-like 1A                                                | NM_207530                                                                        |
| 185 | Osbpl1a  | :oxysterol binding protein-like 1A                                                | NM_207530                                                                        |
| 186 | Pcolce   | :procollagen C-endopeptidase enhancer protein                                     | NM_008788                                                                        |
| 187 | Pdgfra   | :platelet derived growth factor receptor, alpha polypeptide                       | NM_001083316 /// NM_011058                                                       |
| 188 | PF4      | :platelet factor 4                                                                | NM_019932                                                                        |
| 189 | Pfn2     | :profilin 2                                                                       | NM_019410                                                                        |
| 190 | Pip5k1b  | :phosphatidylinositol-4-phosphate 5-kinase, type 1 beta                           | NM_008846                                                                        |
| 191 | Pitrm1   | :pitrilysin metallopeptidase 1                                                    | NM_145131                                                                        |
| 192 | Pkp4     | :plakophilin 4                                                                    | NM_026361 /// NM_175464                                                          |
| 193 | Plin2    | :perilipin 2                                                                      | NM_007408                                                                        |
| 194 | Postn    | :periostin, osteoblast specific factor                                            | NM_015784                                                                        |
| 195 | Ppap2a   | :phosphatidic acid phosphatase type 2A                                            | NM_008247 /// NM_008903                                                          |
| 196 | Ppap2a   | :phosphatidic acid phosphatase type 2A                                            | NM_008247 /// NM_008903                                                          |
| 197 | Ppap2b   | :phosphatidic acid phosphatase type 2B                                            | NM_080555                                                                        |
| 198 | Prdx6    | :peroxiredoxin 6                                                                  | NM_007453                                                                        |
| 199 | Prkcz    | :protein kinase C, zeta                                                           | NM_001039079 /// NM_008860                                                       |
| 200 | Prpf19   | :PRP19/PSO4 pre-mRNA processing factor 19 homolog (S. cerevisiae)                 | NM_134129                                                                        |
| 201 | Prpf19   | :PRP19/PSO4 pre-mRNA processing factor 19 homolog (S. cerevisiae)                 | NM_134129                                                                        |
| 202 | Ptger4   | :prostaglandin E receptor 4 (subtype EP4)                                         | NM_001136079 /// NM_008965                                                       |
| 203 | Ptpn20   | :protein tyrosine phosphatase, non-receptor type 20                               | NM_008978                                                                        |
| 204 | Ptpn4    | :protein tyrosine phosphatase, non-receptor type 4                                | NM_019933                                                                        |
| 205 | Rdx      | :radixin                                                                          | NM_001104616 /// NM_001104617 /// NM_009041                                      |
| 206 | Rdx      | :radixin                                                                          | NM_001104616 /// NM_001104617 /// NM_009041                                      |
| 207 | Rdx      | :radixin                                                                          | NM_001104616 /// NM_001104617 /// NM_009041                                      |
| 208 | Ripply3  | :rippy3 homolog (zebrafish)                                                       | NM_133229                                                                        |
| 209 | Rnase4   | :ribonuclease, RNase A family 4                                                   | NM_021472 /// NM_201239                                                          |
| 210 | Robo1    | :roundabout homolog 1 (Drosophila)                                                | NM_019413                                                                        |
| 211 | Rpn1     | :ribophorin I                                                                     | NM_133933                                                                        |
| 212 | Rpn1     | :ribophorin I                                                                     | NM_133933                                                                        |
| 213 | S100a10  | :S100 calcium binding protein A10 (calpactin)                                     | NM_009112                                                                        |
| 214 | Sash1    | :SAM and SH3 domain containing 1                                                  | NM_175155                                                                        |
| 215 | Sdpr     | :serum deprivation response                                                       | NM_138741                                                                        |
| 216 | Sel1l    | :sel-1 suppressor of lin-12-like (C. elegans)                                     | NM_001039089 /// NM_011344                                                       |
| 217 | Sema3f   | :sema domain, immunoglobulin domain (Ig), short basic domain, secreted, (semaphor | NM_011349                                                                        |
| 218 | Serpini1 | :serine (or cysteine) peptidase inhibitor, clade I, member 1                      | NM_009250                                                                        |
| 219 | Sgk1     | :serum/glucocorticoid regulated kinase 1                                          | NM_001161845 /// NM_001161847 /// NM_001161848 /// NM_001161849 /// NM_001161850 |
| 220 | Sgpp1    | :sphingosine-1-phosphate phosphatase 1                                            | NM_030750                                                                        |
| 221 | Sh3kbp1  | :SH3-domain kinase binding protein 1                                              | NM_001135727 /// NM_001135728 /// NM_021389                                      |
| 222 | Sil1     | :endoplasmic reticulum chaperone SIL1 homolog (S. cerevisiae)                     | NM_030749                                                                        |
| 223 | Slamf9   | :SLAM family member 9                                                             | NM_029612                                                                        |
| 224 | Slc12a8  | :solute carrier family 12 (potassium/chloride transporters), member 8             | NM_001083902 /// NM_134251                                                       |
| 225 | Slc1a1   | :solute carrier family 1 (neuronal/epithelial high affinity glutamate transporter | NM_009199                                                                        |
| 226 | Slc25a4  | :solute carrier family 25 (mitochondrial carrier, adenine nucleotide translocator | NM_007450                                                                        |
| 227 | Slc25a4  | :solute carrier family 25 (mitochondrial carrier, adenine nucleotide translocator | NM_007450                                                                        |

|     |                                |                                                                                   |                                                                                 |
|-----|--------------------------------|-----------------------------------------------------------------------------------|---------------------------------------------------------------------------------|
| 228 | Slc25a4                        | :solute carrier family 25 (mitochondrial carrier, adenine nucleotide translocator | NM_007450                                                                       |
| 229 | Slit3                          | :Slit homolog 3 (Drosophila)                                                      | NM_011412                                                                       |
| 230 | Smad7                          | :MAD homolog 7 (Drosophila)                                                       | NM_001042660                                                                    |
| 231 | Smoc1                          | :SPARC related modular calcium binding 1                                          | NM_001146217 /// NM_022316                                                      |
| 232 | Smyd2                          | :SET and MYND domain containing 2                                                 | NM_026796                                                                       |
| 233 | Snrpn /// Snurf                | :small nuclear ribonucleoprotein N /// SNRPN upstream reading frame               | NM_001082961 /// NM_001082962 /// NM_013670 /// NM_033174                       |
| 234 | Sntg2                          | :syntrophin, gamma 2                                                              | NM_172951                                                                       |
| 235 | Sod1                           | :superoxide dismutase 1, soluble                                                  | NM_011434                                                                       |
| 236 | Spats2                         | :spermatogenesis associated, serine-rich 2                                        | NM_139140                                                                       |
| 237 | Spp1                           | :secreted phosphoprotein 1                                                        | NM_009263                                                                       |
| 238 | Srgn                           | :serglycin                                                                        | NM_011157                                                                       |
| 239 | Stab1                          | :stabilin 1                                                                       | NM_138672                                                                       |
| 240 | Steap4                         | :STEAP family member 4                                                            | NM_054098                                                                       |
| 241 | Tgfb2                          | :transforming growth factor, beta 2                                               | NM_009367                                                                       |
| 242 | Tgfb2                          | :transforming growth factor, beta 2                                               | NM_009367                                                                       |
| 243 | Tgfb1                          | :transforming growth factor, beta induced                                         | NM_009369                                                                       |
| 244 | Timp2                          | :tissue inhibitor of metalloproteinase 2                                          | NM_011594                                                                       |
| 245 | Tmeff2                         | :transmembrane protein with EGF-like and two follistatin-like domains 2           | NM_019790                                                                       |
| 246 | Tmem176a                       | :transmembrane protein 176A                                                       | NM_001098271 /// NM_025326                                                      |
| 247 | Tnfsf10                        | :tumor necrosis factor (ligand) superfamily, member 10                            | NM_009425                                                                       |
| 248 | Trpc1                          | :transient receptor potential cation channel, subfamily C, member 1               | NM_011643                                                                       |
| 249 | Tshz1                          | :teashirt zinc finger family member 1                                             | NM_001081300                                                                    |
| 250 | Tspan15                        | :tetraspanin 15                                                                   | NM_197996                                                                       |
| 251 | Ttc39b                         | :tetratricopeptide repeat domain 39B                                              | NM_027238                                                                       |
| 252 | Ttc8                           | :tetratricopeptide repeat domain 8                                                | NM_029553 /// NM_198311                                                         |
| 253 | Ubl5                           | :ubiquitin-like 5                                                                 | NM_025401                                                                       |
| 254 | Ugt1a1 /// Ugt1a10 /// Ugt1a11 | :UDP glucuronosyltransferase 1 family, polypeptide A1 /// UDP glycosyltransferase | NM_013701 /// NM_145079 /// NM_201410 /// NM_201641 /// NM_201642 /// NM_201643 |
| 255 | Uhrf1bp1l                      | :UHRF1 (ICBP90) binding protein 1-like                                            | NM_029166                                                                       |
| 256 | Usp2                           | :ubiquitin specific peptidase 2                                                   | NM_016808 /// NM_198091 /// NM_198092                                           |
| 257 | Usp2                           | :ubiquitin specific peptidase 2                                                   | NM_016808 /// NM_198091 /// NM_198092                                           |
| 258 | Usp3                           | :ubiquitin specific peptidase 3                                                   | NM_144937                                                                       |
| 259 | Usp3                           | :ubiquitin specific peptidase 3                                                   | NM_144937                                                                       |
| 260 | Vim                            | :vimentin                                                                         | NM_011701                                                                       |
| 261 | Wdr45                          | :WD repeat domain 45                                                              | NM_172372                                                                       |
| 262 | Wdr81                          | :WD repeat domain 81                                                              | NM_138950 /// XM_001002633 /// XM_911699                                        |
| 263 | Wwp1                           | :WW domain containing E3 ubiquitin protein ligase 1                               | NM_177327                                                                       |
| 264 | Zadh2                          | :zinc binding alcohol dehydrogenase, domain containing 2                          | NM_146090                                                                       |
| 265 | ---                            | ---                                                                               | ---                                                                             |
| 266 | ---                            | ---                                                                               | ---                                                                             |

**Table S3.** Differentially expressed genes in Study 1 OG samples revealed by ANOVA

| No. | Gene Symbol                 | Gene Title                                                                    | p-value  | RefSeq ID                                |
|-----|-----------------------------|-------------------------------------------------------------------------------|----------|------------------------------------------|
| 1   | Igh /// Igh-2 /// Igh-VJ558 | immunoglobulin heavy chain complex /// immunoglobulin heavy chain 2 (ser      | 9.97E-09 | ---                                      |
| 2   | Slpi                        | secretory leukocyte peptidase inhibitor                                       | 6.76E-07 | NM_011414                                |
| 3   | Hpgd                        | hydroxyprostaglandin dehydrogenase 15 (NAD)                                   | 2.22E-06 | NM_008278                                |
| 4   | Col14a1                     | collagen, type XIV, alpha 1                                                   | 2.38E-06 | NM_181277                                |
| 5   | Igh /// Igh-2 /// Igh-VJ558 | immunoglobulin heavy chain complex /// immunoglobulin heavy chain 2 (ser      | 2.58E-06 | ---                                      |
| 6   | Gm5560 /// Gm8429 /// Slc2  | predicted gene 5560 /// predicted gene 8429 /// solute carrier family 25 (mit | 2.85E-06 | NM_001081233 /// NM_007451 /// XR_033177 |
| 7   | Gpx1                        | glutathione peroxidase 1                                                      | 4.02E-06 | NM_008160                                |
| 8   | Cdc42se2                    | CDC42 small effector 2                                                        | 4.08E-06 | NM_178626                                |
| 9   | Ramp2                       | receptor (calcitonin) activity modifying protein 2                            | 4.15E-06 | NM_019444                                |
| 10  | Ddx26b                      | DEAD/H (Asp-Glu-Ala-Asp/His) box polypeptide 26B                              | 4.27E-06 | NM_172779                                |
| 11  | Pwp1                        | PWP1 homolog (S. cerevisiae)                                                  | 4.92E-06 | NM_133993                                |
| 12  | Ltbp2                       | latent transforming growth factor beta binding protein 2                      | 5.07E-06 | NM_013589                                |
| 13  | Tram1                       | translocating chain-associating membrane protein 1                            | 9.53E-06 | NM_028173                                |
| 14  | Col6a3                      | collagen, type VI, alpha 3                                                    | 9.62E-06 | XM_001474562 /// XM_897036               |
| 15  | Edem1                       | ER degradation enhancer, mannosidase alpha-like 1                             | 1.03E-05 | NM_138677                                |
| 16  | Rbbp7                       | retinoblastoma binding protein 7                                              | 1.06E-05 | NM_009031                                |
| 17  | Ero1lb                      | ERO1-like beta (S. cerevisiae)                                                | 1.37E-05 | NM_026184                                |
| 18  | Atxn7                       | ataxin 7                                                                      | 1.46E-05 | NM_139227                                |
| 19  | Igj                         | immunoglobulin joining chain                                                  | 1.48E-05 | NM_152839                                |
| 20  | Reln                        | reelin                                                                        | 1.61E-05 | NM_011261                                |
| 21  | Rbbp7                       | retinoblastoma binding protein 7                                              | 2.05E-05 | NM_009031                                |
| 22  | Postn                       | periostin, osteoblast specific factor                                         | 2.19E-05 | NM_015784                                |
| 23  | Mbd1                        | methyl-CpG binding domain protein 1                                           | 2.38E-05 | NM_013594                                |
| 24  | Dusp18                      | dual specificity phosphatase 18                                               | 2.54E-05 | NM_173745                                |
| 25  | Lama2                       | laminin, alpha 2                                                              | 2.58E-05 | NM_008481                                |
| 26  | Ear1                        | eosinophil-associated, ribonuclease A family, member 1                        | 2.68E-05 | NM_007894                                |
| 27  | Nr4a1                       | nuclear receptor subfamily 4, group A, member 1                               | 2.82E-05 | NM_010444                                |
| 28  | RP23-195K8.6                | hypothetical protein LOC622404                                                | 2.95E-05 | NM_001037913                             |
| 29  | Sel1l                       | sel-1 suppressor of lin-12-like (C. elegans)                                  | 3.40E-05 | NM_001039089 /// NM_011344               |
| 30  | Sel1l                       | sel-1 suppressor of lin-12-like (C. elegans)                                  | 3.49E-05 | NM_001039089 /// NM_011344               |
| 31  | Elmo1                       | engulfment and cell motility 1, ced-12 homolog (C. elegans)                   | 3.54E-05 | NM_080288 /// NM_198093                  |
| 32  | Col14a1                     | collagen, type XIV, alpha 1                                                   | 3.60E-05 | NM_181277                                |



|    |                             |                                                                                    |          |                                             |
|----|-----------------------------|------------------------------------------------------------------------------------|----------|---------------------------------------------|
| 33 | Stard5                      | STAR-related lipid transfer (START) domain containing 5                            | 3.71E-05 | NM_023377                                   |
| 34 | Nfkbiz                      | nuclear factor of kappa light polypeptide gene enhancer in B-cells inhibitor, zeta | 3.74E-05 | NM_001159394 /// NM_001159395 /// NM_030612 |
| 35 | Slco2a1                     | solute carrier organic anion transporter family, member 2a1                        | 3.78E-05 | NM_033314                                   |
| 36 | Ube2d3                      | ubiquitin-conjugating enzyme E2D 3 (UBC4/5 homolog, yeast)                         | 3.90E-05 | NM_025356                                   |
| 37 | Acaa1a /// Acaa1b           | acetyl-Coenzyme A acyltransferase 1A /// acetyl-Coenzyme A acyltransferase         | 4.08E-05 | NM_130864 /// NM_146230                     |
| 38 | Svep1                       | sushi, von Willebrand factor type A, EGF and pentraxin domain containing 1         | 4.11E-05 | NM_022814                                   |
| 39 | Il1rl1                      | interleukin 1 receptor-like 1                                                      | 4.11E-05 | NM_001025602 /// NM_010743                  |
| 40 | Irf3                        | interferon regulatory factor 3                                                     | 4.28E-05 | NM_016849                                   |
| 41 | Ica1                        | islet cell autoantigen 1                                                           | 4.29E-05 | NM_010492                                   |
| 42 | Gabpa                       | GA repeat binding protein, alpha                                                   | 4.68E-05 | NM_008065                                   |
| 43 | Dnajc3                      | DnaJ (Hsp40) homolog, subfamily C, member 3                                        | 5.16E-05 | NM_008929                                   |
| 44 | Zfp521                      | zinc finger protein 521                                                            | 5.25E-05 | NM_145492 /// NM_181326                     |
| 45 | 1500031L02Rik               | RIKEN cDNA 1500031L02 gene                                                         | 5.37E-05 | NM_025892                                   |
| 46 | Itsn2                       | intersectin 2                                                                      | 5.66E-05 | NM_011365                                   |
| 47 | Mosc2                       | MOCO sulphurase C-terminal domain containing 2                                     | 5.88E-05 | NM_133684                                   |
| 48 | Pgam1                       | phosphoglycerate mutase 1                                                          | 5.88E-05 | NM_023418                                   |
| 49 | Scara5                      | scavenger receptor class A, member 5 (putative)                                    | 6.01E-05 | NM_028903                                   |
| 50 | Lifr                        | leukemia inhibitory factor receptor                                                | 6.47E-05 | NM_001113386 /// NM_013584                  |
| 51 | Avpi1                       | arginine vasopressin-induced 1                                                     | 7.04E-05 | NM_027106                                   |
| 52 | Igh /// LOC631129 /// LOC67 | immunoglobulin heavy chain complex /// similar to Ig heavy chain V-III region      | 7.15E-05 | XM_984967 /// XR_031667 /// XR_034099       |
| 53 | Gorasp2                     | golgi reassembly stacking protein 2                                                | 8.00E-05 | NM_027352 /// NR_027343                     |
| 54 | Fos                         | FBJ osteosarcoma oncogene                                                          | 8.00E-05 | NM_010234                                   |
| 55 | Cand1                       | cullin associated and neddylation disassociated 1                                  | 8.93E-05 | NM_027994 /// XM_125901 /// XM_904108       |
| 56 | Prr13                       | proline rich 13                                                                    | 8.97E-05 | NM_025385                                   |
| 57 | Ptgs2                       | prostaglandin-endoperoxide synthase 2                                              | 9.23E-05 | NM_011198                                   |
| 58 | Gpnmb                       | glycoprotein (transmembrane) nmb                                                   | 9.25E-05 | NM_053110                                   |
| 59 | Ccl11                       | chemokine (C-C motif) ligand 11                                                    | 9.26E-05 | NM_011330                                   |
| 60 | Tm2d2                       | TM2 domain containing 2                                                            | 9.66E-05 | NM_027194                                   |
| 61 | Pim3                        | proviral integration site 3                                                        | 9.86E-05 | NM_145478                                   |
| 62 | Ythdf2                      | YTH domain family 2                                                                | 9.87E-05 | NM_145393                                   |
| 63 | Trmt2a                      | TRM2 tRNA methyltransferase 2 homolog A (S. cerevisiae)                            | 1.01E-04 | NM_001080999 /// NM_001081000 /// NM_008307 |
| 64 | Ck1f                        | chemokine-like factor                                                              | 1.01E-04 | NM_001037841 /// NM_029295                  |
| 65 | Abat                        | 4-aminobutyrate aminotransferase                                                   | 1.03E-04 | NM_172961                                   |
| 66 | Aldoa /// Aldoart1          | aldolase A, fructose-bisphosphate /// aldolase 1, A isoform, retrogene 1           | 1.03E-04 | NM_007438                                   |
| 67 | Iars2                       | isoleucine-tRNA synthetase 2, mitochondrial                                        | 1.04E-04 | NM_198653                                   |

|     |                                  |                                                                                  |          |                                                        |
|-----|----------------------------------|----------------------------------------------------------------------------------|----------|--------------------------------------------------------|
| 68  | LOC100047222 /// LOC67619        | similar to anti-glycoprotein-B of human Cytomegalovirus immunoglobulin VI c      | 1.05E-04 | XM_001477680 /// XM_988029                             |
| 69  | Txndc16                          | thioredoxin domain containing 16                                                 | 1.07E-04 | NM_172597                                              |
| 70  | 1110008F13Rik                    | RIKEN cDNA 1110008F13 gene                                                       | 1.07E-04 | NM_026124                                              |
| 71  | PsmA6                            | proteasome (prosome, macropain) subunit, alpha type 6                            | 1.18E-04 | NM_011968                                              |
| 72  | Ctsc                             | cathepsin C                                                                      | 1.20E-04 | NM_009982                                              |
| 73  | 2310044G17Rik                    | RIKEN cDNA 2310044G17 gene                                                       | 1.21E-04 | NM_173735                                              |
| 74  | Fh1                              | fumarate hydratase 1                                                             | 1.24E-04 | NM_010209                                              |
| 75  | Brpf1                            | bromodomain and PHD finger containing, 1                                         | 1.27E-04 | NM_030178                                              |
| 76  | H2-Ke6                           | H2-K region expressed gene 6                                                     | 1.30E-04 | NM_013543                                              |
| 77  | Wac                              | WW domain containing adaptor with coiled-coil                                    | 1.34E-04 | NM_001146298 /// NM_153085 /// NR_027465               |
| 78  | Fastkd2                          | FAST kinase domains 2                                                            | 1.34E-04 | NM_172422                                              |
| 79  | Arf6                             | ADP-ribosylation factor 6                                                        | 1.34E-04 | NM_007481                                              |
| 80  | Ear1 /// Ear12 /// Ear2 /// Ear3 | eosinophil-associated, ribonuclease A family, member 1 /// eosinophil-associated | 1.35E-04 | NM_001012766 /// NM_007894 /// NM_007895 /// NM_017388 |
| 81  | Antxr1                           | anthrax toxin receptor 1                                                         | 1.35E-04 | NM_054041                                              |
| 82  | Pik3cg                           | phosphoinositide-3-kinase, catalytic, gamma polypeptide                          | 1.41E-04 | NM_001146200 /// NM_001146201 /// NM_020272            |
| 83  | Cma1                             | chymase 1, mast cell                                                             | 1.51E-04 | NM_010780                                              |
| 84  | Chd4                             | chromodomain helicase DNA binding protein 4                                      | 1.53E-04 | NM_145979                                              |
| 85  | Wipi1                            | WD repeat domain, phosphoinositide interacting 1                                 | 1.54E-04 | NM_145940                                              |
| 86  | Baz2a                            | bromodomain adjacent to zinc finger domain, 2A                                   | 1.57E-04 | NM_054078                                              |
| 87  | Grem2                            | gremlin 2 homolog, cysteine knot superfamily (Xenopus laevis)                    | 1.57E-04 | NM_011825                                              |
| 88  | Pole2                            | polymerase (DNA directed), epsilon 2 (p59 subunit)                               | 1.57E-04 | NM_011133                                              |
| 89  | B9d2                             | B9 protein domain 2                                                              | 1.59E-04 | NM_172148                                              |
| 90  | Ptger4                           | prostaglandin E receptor 4 (subtype EP4)                                         | 1.62E-04 | NM_001136079 /// NM_008965                             |
| 91  | Igfbp1                           | insulin-like growth factor binding protein 1                                     | 1.62E-04 | NM_008341                                              |
| 92  | Emr1                             | EGF-like module containing, mucin-like, hormone receptor-like sequence 1         | 1.62E-04 | NM_010130                                              |
| 93  | Idh3a                            | isocitrate dehydrogenase 3 (NAD+) alpha                                          | 1.63E-04 | NM_029573                                              |
| 94  | Ogt                              | O-linked N-acetylglucosamine (GlcNAc) transferase (UDP-N-acetylglucosamin        | 1.64E-04 | NM_139144                                              |
| 95  | Thbs3                            | thrombospondin 3                                                                 | 1.64E-04 | NM_013691                                              |
| 96  | Comp                             | cartilage oligomeric matrix protein                                              | 1.69E-04 | NM_016685                                              |
| 97  | Tfpt                             | TCF3 (E2A) fusion partner                                                        | 1.73E-04 | NM_023524                                              |
| 98  | ---                              | ---                                                                              | 1.73E-04 | ---                                                    |
| 99  | Clip1                            | CAP-GLY domain containing linker protein 1                                       | 1.80E-04 | NM_019765                                              |
| 100 | Star                             | steroidogenic acute regulatory protein                                           | 1.86E-04 | NM_011485                                              |
| 101 | Blk                              | B lymphoid kinase                                                                | 1.87E-04 | NM_007549                                              |
| 102 | Dnajc1                           | DnaJ (Hsp40) homolog, subfamily C, member 1                                      | 1.96E-04 | NM_007869                                              |

|     |                           |                                                                               |          |                                                                 |
|-----|---------------------------|-------------------------------------------------------------------------------|----------|-----------------------------------------------------------------|
| 103 | Clec2g                    | C-type lectin domain family 2, member g                                       | 1.98E-04 | NM_027562                                                       |
| 104 | Egfl7                     | EGF-like domain 7                                                             | 2.06E-04 | NM_001164564 /// NM_178444 /// NM_198724 /// NM_198725          |
| 105 | Dnajc8                    | DnaJ (Hsp40) homolog, subfamily C, member 8                                   | 2.09E-04 | NM_172400                                                       |
| 106 | Nes                       | nestin                                                                        | 2.09E-04 | NM_016701                                                       |
| 107 | Tfpi2                     | tissue factor pathway inhibitor 2                                             | 2.13E-04 | NM_009364                                                       |
| 108 | Robo4                     | roundabout homolog 4 (Drosophila)                                             | 2.20E-04 | NM_028783                                                       |
| 109 | Pld4                      | phospholipase D family, member 4                                              | 2.25E-04 | NM_178911                                                       |
| 110 | Tmem109                   | transmembrane protein 109                                                     | 2.29E-04 | NM_134142                                                       |
| 111 | 2010205A11Rik /// Gm10883 | RIKEN cDNA 2010205A11 gene /// predicted gene 10883 /// predicted gene        | 2.29E-04 | XM_001476664 /// XM_001476679 /// XM_001476703                  |
| 112 | Agpat5                    | 1-acylglycerol-3-phosphate O-acyltransferase 5 (lysophosphatidic acid acyltra | 2.29E-04 | NM_026792                                                       |
| 113 | Cd38                      | CD38 antigen                                                                  | 2.35E-04 | NM_007646                                                       |
| 114 | Id1                       | inhibitor of DNA binding 1                                                    | 2.36E-04 | NM_010495                                                       |
| 115 | Ncam1                     | neural cell adhesion molecule 1                                               | 2.37E-04 | NM_001081445 /// NM_001113204 /// NM_010875                     |
| 116 | Chrnb1                    | cholinergic receptor, nicotinic, beta polypeptide 1 (muscle)                  | 2.39E-04 | NM_009601                                                       |
| 117 | Derl3                     | Der1-like domain family, member 3                                             | 2.42E-04 | NM_024440                                                       |
| 118 | Cyb5d1 /// Gm6685         | cytochrome b5 domain containing 1 /// cytochrome b5 domain containing 1 p     | 2.43E-04 | NM_001045525 /// XM_484000 /// XM_901734 /// XM_904084 /// XM_9 |
| 119 | Psat1                     | phosphoserine aminotransferase 1                                              | 2.46E-04 | NM_177420                                                       |
| 120 | Pak2                      | p21 protein (Cdc42/Rac)-activated kinase 2                                    | 2.47E-04 | NM_177326                                                       |
| 121 | Ddx19a                    | DEAD (Asp-Glu-Ala-Asp) box polypeptide 19a                                    | 2.56E-04 | NM_007916                                                       |
| 122 | Rars2                     | arginyl-tRNA synthetase 2, mitochondrial                                      | 2.56E-04 | NM_181406                                                       |
| 123 | Fibp                      | fibroblast growth factor (acidic) intracellular binding protein               | 2.58E-04 | NM_021438                                                       |
| 124 | Cpa3                      | carboxypeptidase A3, mast cell                                                | 2.59E-04 | NM_007753                                                       |
| 125 | Ube2b                     | ubiquitin-conjugating enzyme E2B, RAD6 homology (S. cerevisiae)               | 2.60E-04 | NM_009458                                                       |
| 126 | Gzma                      | granzyme A                                                                    | 2.67E-04 | NM_010370                                                       |
| 127 | Lysmd2                    | LysM, putative peptidoglycan-binding, domain containing 2                     | 2.68E-04 | NM_027309                                                       |
| 128 | Tes                       | testis derived transcript                                                     | 2.72E-04 | NM_011570 /// NM_207176                                         |
| 129 | Dgka                      | diacylglycerol kinase, alpha                                                  | 2.73E-04 | NM_016811 /// XM_001475744 /// XM_001480976                     |
| 130 | Atp6v0c                   | ATPase, H+ transporting, lysosomal V0 subunit C                               | 2.75E-04 | NM_009729                                                       |
| 131 | Metap1                    | methionine aminopeptidase-like 1                                              | 2.79E-04 | NM_025633                                                       |
| 132 | Itm2a                     | integral membrane protein 2A                                                  | 2.84E-04 | NM_008409                                                       |
| 133 | Cnot4                     | CCR4-NOT transcription complex, subunit 4                                     | 2.85E-04 | NM_001164411 /// NM_001164412 /// NM_001164413 /// NM_0011644   |
| 134 | Gramd3                    | GRAM domain containing 3                                                      | 2.90E-04 | NM_026240                                                       |
| 135 | Egr1                      | early growth response 1                                                       | 2.90E-04 | NM_007913                                                       |
| 136 | Psmb4                     | proteasome (prosome, macropain) subunit, beta type 4                          | 2.97E-04 | NM_008945                                                       |

**Table S4.** Differentially expressed genes in Study 1 OG samples revealed by BETR

| No. | Gene Symbol             | Gene Title                                                                       | RefSeq ID                    | Pathway                                                 |
|-----|-------------------------|----------------------------------------------------------------------------------|------------------------------|---------------------------------------------------------|
| 1   | 1100001G20Rik           | RIKEN cDNA 1100001G20 gene                                                       | NM_183249                    | ---                                                     |
| 2   | 1110057K04Rik           | RIKEN cDNA 1110057K04 gene                                                       | NM_172401                    | ---                                                     |
| 3   | 1810020D17Rik           | RIKEN cDNA 1810020D17 gene                                                       | NM_183251                    | ---                                                     |
| 4   | A530016L24Rik           | RIKEN cDNA A530016L24 gene                                                       | NM_177039                    | ---                                                     |
| 5   | Abat                    | 4-aminobutyrate aminotransferase                                                 | NM_172961                    | ---                                                     |
| 6   | Acly                    | ATP citrate lyase                                                                | NM_134037                    | Fatty_Acid_Synthesis // GenMAPP                         |
| 7   | Ada                     | adenosine deaminase                                                              | NM_007398                    | ---                                                     |
| 8   | Adamts1                 | a disintegrin-like and metallopeptidase (reprolysin type) with thrombospondin ty | NM_009621                    | ---                                                     |
| 9   | Adh1                    | alcohol dehydrogenase 1 (class I)                                                | NM_007409                    | ---                                                     |
| 10  | Adora1                  | adenosine A1 receptor                                                            | NM_001008533 // NM_001008533 | GPCRDB_Other // GenMAPP /// Nucleotide_GPCRs // GenMAPP |
| 11  | AI324046                | expressed sequence AI324046                                                      | ---                          | ---                                                     |
| 12  | Antxr1                  | anthrax toxin receptor 1                                                         | NM_054041                    | ---                                                     |
| 13  | Apccd1                  | adenomatosis polyposis coli down-regulated 1                                     | NM_133237                    | ---                                                     |
| 14  | Btg2                    | B-cell translocation gene 2, anti-proliferative                                  | NM_007570                    | ---                                                     |
| 15  | Bub1b                   | budding uninhibited by benzimidazoles 1 homolog, beta (S. cerevisiae)            | NM_009773                    | Cell_Cycle_KEGG // GenMAPP                              |
| 16  | Ccl11                   | chemokine (C-C motif) ligand 11                                                  | NM_011330                    | ---                                                     |
| 17  | Ccnl1                   | cyclin L1                                                                        | NM_019937                    | ---                                                     |
| 18  | Cd163                   | CD163 antigen                                                                    | NM_053094                    | ---                                                     |
| 19  | Chpt1                   | choline phosphotransferase 1                                                     | NM_001146690 // NM_001146690 | ---                                                     |
| 20  | Cma1                    | chymase 1, mast cell                                                             | NM_010780                    | ---                                                     |
| 21  | Col14a1                 | collagen, type XIV, alpha 1                                                      | NM_181277                    | ---                                                     |
| 22  | Col14a1                 | collagen, type XIV, alpha 1                                                      | NM_181277                    | ---                                                     |
| 23  | Col6a3                  | collagen, type VI, alpha 3                                                       | XM_001474562 // XM_001474562 | ---                                                     |
| 24  | Cpa3                    | carboxypeptidase A3, mast cell                                                   | NM_007753                    | ---                                                     |
| 25  | Cspg4                   | chondroitin sulfate proteoglycan 4                                               | NM_139001                    | ---                                                     |
| 26  | Ctse                    | cathepsin E                                                                      | NM_007799                    | ---                                                     |
| 27  | Cyr61                   | cysteine rich protein 61                                                         | NM_010516                    | ---                                                     |
| 28  | Cyr61                   | cysteine rich protein 61                                                         | NM_010516                    | ---                                                     |
| 29  | Decr1                   | 2,4-dienoyl CoA reductase 1, mitochondrial                                       | NM_026172                    | ---                                                     |
| 30  | Derl3                   | Der1-like domain family, member 3                                                | NM_024440                    | ---                                                     |
| 31  | Dhx32                   | DEAH (Asp-Glu-Ala-His) box polypeptide 32                                        | NM_133941                    | ---                                                     |
| 32  | Dnajc3                  | DnaJ (Hsp40) homolog, subfamily C, member 3                                      | NM_008929                    | ---                                                     |
| 33  | Dpysl3                  | dihydropyrimidinase-like 3                                                       | NM_001136086 // NM_001136086 | ---                                                     |
| 34  | Ear1                    | eosinophil-associated, ribonuclease A family, member 1                           | NM_007894                    | ---                                                     |
| 35  | Ear1 /// Ear12 /// Ear2 | eosinophil-associated, ribonuclease A family, member 1 /// eosinophil-associated | NM_001012766 // NM_001012766 | ---                                                     |
| 36  | Ear2                    | eosinophil-associated, ribonuclease A family, member 2                           | NM_007895                    | ---                                                     |
| 37  | Edem1                   | ER degradation enhancer, mannosidase alpha-like 1                                | NM_138677                    | ---                                                     |
| 38  | Egr1                    | early growth response 1                                                          | NM_007913                    | Ovarian_Infertility_Genes // GenMAPP                    |
| 39  | Egr2                    | early growth response 2                                                          | NM_010118                    | ---                                                     |
| 40  | Elmo1                   | engulfment and cell motility 1, ced-12 homolog (C. elegans)                      | NM_080288 // NM_080288       | ---                                                     |
| 41  | Emr1                    | EGF-like module containing, mucin-like, hormone receptor-like sequence 1         | NM_010130                    | GPCRDB_Class_B_Secretin-like // GenMAPP                 |
| 42  | Ero1b                   | ERO1-like beta (S. cerevisiae)                                                   | NM_026184                    | ---                                                     |
| 43  | Errfi1                  | ERBB receptor feedback inhibitor 1                                               | NM_133753                    | ---                                                     |

|    |                           |                                                                                  |                     |                                                                     |
|----|---------------------------|----------------------------------------------------------------------------------|---------------------|---------------------------------------------------------------------|
| 44 | F13a1                     | coagulation factor XIII, A1 subunit                                              | NM_028784           | ---                                                                 |
| 45 | Fbln5                     | fibulin 5                                                                        | NM_011812           | ---                                                                 |
| 46 | Fkbp11                    | FK506 binding protein 11                                                         | NM_024169           | ---                                                                 |
| 47 | Fos                       | FBJ osteosarcoma oncogene                                                        | NM_010234           | Smooth_muscle_contraction // GenMAPP /// TGF_Beta_Signaling_Path    |
| 48 | Gem                       | GTP binding protein (gene overexpressed in skeletal muscle)                      | NM_010276           | ---                                                                 |
| 49 | Gm5560 /// Gm8429 ///     | predicted gene 5560 /// predicted gene 8429 /// solute carrier family 25 (mitoch | NM_001081233 /// NM | Electron_Transport_Chain // GenMAPP                                 |
| 50 | Gpc3                      | glypican 3                                                                       | NM_016697           | ---                                                                 |
| 51 | Gpnmb                     | glycoprotein (transmembrane) nmb                                                 | NM_053110           | ---                                                                 |
| 52 | Grem2                     | gremlin 2 homolog, cysteine knot superfamily (Xenopus laevis)                    | NM_011825           | ---                                                                 |
| 53 | Has1                      | hyaluronan synthase1                                                             | NM_008215           | ---                                                                 |
| 54 | Hbb-b1 /// Hbb-b2         | hemoglobin, beta adult major chain /// hemoglobin, beta adult minor chain        | NM_008220 /// NM_0  | Calcium_regulation_in_cardiac_cells // GenMAPP /// G_Protein_Signal |
| 55 | Hpgd                      | hydroxyprostaglandin dehydrogenase 15 (NAD)                                      | NM_008278           | Prostaglandin_synthesis_regulation // GenMAPP                       |
| 56 | Id3                       | inhibitor of DNA binding 3                                                       | NM_008321           | ---                                                                 |
| 57 | Igh                       | immunoglobulin heavy chain complex                                               | ---                 | ---                                                                 |
| 58 | Igh                       | immunoglobulin heavy chain complex                                               | ---                 | ---                                                                 |
| 59 | Igh /// Igh-2 /// Igh-VJ5 | immunoglobulin heavy chain complex /// immunoglobulin heavy chain 2 (serum IgA)  | ---                 | ---                                                                 |
| 60 | Igh /// Igh-2 /// Igh-VJ5 | immunoglobulin heavy chain complex /// immunoglobulin heavy chain 2 (serum IgA)  | ---                 | ---                                                                 |
| 61 | Igh /// Ighg1             | immunoglobulin heavy chain complex /// immunoglobulin heavy constant gamma 1 (G1 | ---                 | ---                                                                 |
| 62 | Igh /// LOC631129 /// L   | immunoglobulin heavy chain complex /// similar to Ig heavy chain V-III region J6 | XM_984967 /// XR_0  | ---                                                                 |
| 63 | Igk-V19-14                | Immunoglobulin kappa chain variable 19 (V19)-14                                  | ---                 | ---                                                                 |
| 64 | Il1rl1                    | interleukin 1 receptor-like 1                                                    | NM_001025602 /// NM | ---                                                                 |
| 65 | Il27ra                    | interleukin 27 receptor, alpha                                                   | NM_016671           | ---                                                                 |
| 66 | Kcnk2                     | potassium channel, subfamily K, member 2                                         | NM_001159850 /// NM | ---                                                                 |
| 67 | Klf4                      | Kruppel-like factor 4 (gut)                                                      | NM_010637           | ---                                                                 |
| 68 | Klk8                      | kallikrein related-peptidase 8                                                   | NM_008940           | ---                                                                 |
| 69 | Lama2                     | laminin, alpha 2                                                                 | NM_008481           | ---                                                                 |
| 70 | Lamb1-1                   | laminin B1 subunit 1                                                             | NM_008482           | Inflammatory_Response_Pathway // GenMAPP                            |
| 71 | Ldlr                      | low density lipoprotein receptor                                                 | NM_010700           | Statin_Pathway_PharmGKB // GenMAPP /// Wnt_Signaling // GenMAP      |
| 72 | LOC100045982 /// Mosc     | similar to MOSC domain-containing protein 1, mitochondrial /// MOCO sulphurase C | NM_001081361 /// XM | ---                                                                 |
| 73 | LOC100046643 /// Spry     | similar to sprouty 1 /// sprouty homolog 1 (Drosophila)                          | NM_011896 /// XM_0  | ---                                                                 |
| 74 | LOC100047162 /// LOC      | similar to immunoglobulin kappa-chain /// similar to Ig kappa chain V-V region M | XM_001477552 /// XM | ---                                                                 |
| 75 | LOC100047222 /// LOC      | similar to anti-glycoprotein-B of human Cytomegalovirus immunoglobulin VI chain  | XM_001477680 /// XM | ---                                                                 |
| 76 | Ltbp2                     | latent transforming growth factor beta binding protein 2                         | NM_013589           | ---                                                                 |
| 77 | Lyplal1                   | lysophospholipase-like 1                                                         | NM_146106           | ---                                                                 |
| 78 | Matn2                     | matrilin 2                                                                       | NM_016762           | ---                                                                 |
| 79 | Mbd1                      | methyl-CpG binding domain protein 1                                              | NM_013594           | ---                                                                 |
| 80 | Meg3                      | maternally expressed 3                                                           | NR_003633 /// NR_0  | ---                                                                 |
| 81 | Mfap5                     | microfibrillar associated protein 5                                              | NM_015776           | ---                                                                 |
| 82 | Mgst2                     | microsomal glutathione S-transferase 2                                           | NM_174995           | ---                                                                 |
| 83 | Mt1                       | metallothionein 1                                                                | NM_013602           | ---                                                                 |
| 84 | Mtap                      | methylthioadenosine phosphorylase                                                | NM_024433           | ---                                                                 |
| 85 | Nacc2                     | nucleus accumbens associated 2, BEN and BTB (POZ) domain containing              | NM_001037098 /// NM | ---                                                                 |
| 86 | Ncam1                     | neural cell adhesion molecule 1                                                  | NM_001081445 /// NM | ---                                                                 |
| 87 | Ndn                       | necdin                                                                           | NM_010882           | ---                                                                 |
| 88 | Nov                       | nephroblastoma overexpressed gene                                                | NM_010930           | ---                                                                 |
| 89 | Nr4a1                     | nuclear receptor subfamily 4, group A, member 1                                  | NM_010444           | Nuclear_Receptors // GenMAPP                                        |

|     |          |                                                                                  |                     |                                                                     |
|-----|----------|----------------------------------------------------------------------------------|---------------------|---------------------------------------------------------------------|
| 90  | Odz3     | odd Oz/ten-m homolog 3 (Drosophila)                                              | NM_001145937 /// NM | ---                                                                 |
| 91  | Pcolce2  | procollagen C-endopeptidase enhancer 2                                           | NM_029620           | ---                                                                 |
| 92  | Postn    | periostin, osteoblast specific factor                                            | NM_015784           | ---                                                                 |
| 93  | Psat1    | phosphoserine aminotransferase 1                                                 | NM_177420           | ---                                                                 |
| 94  | Ptger3   | prostaglandin E receptor 3 (subtype EP3)                                         | NM_011196           | GPCRDB_Class_A_Rhodopsin-like // GenMAPP /// Prostaglandin_synth    |
| 95  | Ptgs2    | prostaglandin-endoperoxide synthase 2                                            | NM_011198           | Eicosanoid_Synthesis // GenMAPP /// Prostaglandin_synthesis_regulat |
| 96  | Ptprd    | protein tyrosine phosphatase, receptor type, D                                   | NM_001014288 /// NM | ---                                                                 |
| 97  | Pvr12    | poliovirus receptor-related 2                                                    | NM_001159724 /// NM | ---                                                                 |
| 98  | Pxmp2    | peroxisomal membrane protein 2                                                   | NM_008993           | ---                                                                 |
| 99  | Ramp2    | receptor (calcitonin) activity modifying protein 2                               | NM_019444           | Smooth_muscle_contraction // GenMAPP                                |
| 100 | Rdh10    | retinol dehydrogenase 10 (all-trans)                                             | NM_133832           | ---                                                                 |
| 101 | Rein     | reelin                                                                           | NM_011261           | ---                                                                 |
| 102 | Scara5   | scavenger receptor class A, member 5 (putative)                                  | NM_028903           | ---                                                                 |
| 103 | Sdpr     | serum deprivation response                                                       | NM_138741           | ---                                                                 |
| 104 | Sel1l    | sel-1 suppressor of lin-12-like (C. elegans)                                     | NM_001039089 /// NM | ---                                                                 |
| 105 | Sel1l    | sel-1 suppressor of lin-12-like (C. elegans)                                     | NM_001039089 /// NM | ---                                                                 |
| 106 | Selk     | selenoprotein K                                                                  | NM_019979           | ---                                                                 |
| 107 | Sema5a   | sema domain, seven thrombospondin repeats (type 1 and type 1-like), transmembran | NM_009154           | ---                                                                 |
| 108 | Sipi     | secretory leukocyte peptidase inhibitor                                          | NM_011414           | ---                                                                 |
| 109 | Star     | steroidogenic acute regulatory protein                                           | NM_011485           | ---                                                                 |
| 110 | Stbd1    | starch binding domain 1                                                          | NM_175096           | Circadian_Exercise // GenMAPP                                       |
| 111 | Svep1    | sushi, von Willebrand factor type A, EGF and pentraxin domain containing 1       | NM_022814           | ---                                                                 |
| 112 | Tfpi2    | tissue factor pathway inhibitor 2                                                | NM_009364           | ---                                                                 |
| 113 | Tmem109  | transmembrane protein 109                                                        | NM_134142           | ---                                                                 |
| 114 | Tnfrsf17 | tumor necrosis factor receptor superfamily, member 17                            | NM_011608           | ---                                                                 |
| 115 | Txndc5   | thioredoxin domain containing 5                                                  | NM_145367           | ---                                                                 |
| 116 | Vcan     | versican                                                                         | NM_001081249 /// NM | ---                                                                 |
| 117 | Zfp521   | zinc finger protein 521                                                          | NM_145492 /// NM_1  | ---                                                                 |

**Table S5.** Differentially expressed genes in Study 2 PC samples revealed by ANOVA

| No. | Gene Symbol           | Gene Title                                                         | p-value  | RefSeq ID                                                    |
|-----|-----------------------|--------------------------------------------------------------------|----------|--------------------------------------------------------------|
| 1   | Gaa                   | glucosidase, alpha, acid                                           | 4.93E-10 | NM_001159324 /// NM_008064                                   |
| 2   | Entpd1                | ectonucleoside triphosphate diphosphohydrolase 1                   | 2.29E-09 | NM_009848                                                    |
| 3   | Smc6                  | structural maintenance of chromosomes 6                            | 4.95E-09 | NM_025695                                                    |
| 4   | Clcn5                 | chloride channel 5                                                 | 6.66E-09 | NM_016691                                                    |
| 5   | Nbea                  | neurobeachin                                                       | 8.98E-09 | NM_030595                                                    |
| 6   | Extl2                 | exostosins (multiple)-like 2                                       | 1.73E-08 | NM_001163514 /// NM_001163515 /// NM_021388                  |
| 7   | Osbpl1a               | oxysterol binding protein-like 1A                                  | 2.51E-08 | NM_207530                                                    |
| 8   | Ero1l                 | ERO1-like (S. cerevisiae)                                          | 3.26E-08 | NM_015774                                                    |
| 9   | Cd163                 | CD163 antigen                                                      | 3.90E-08 | NM_053094                                                    |
| 10  | Gjc1                  | gap junction protein, gamma 1                                      | 4.03E-08 | NM_001159382 /// NM_001159383 /// NM_008122                  |
| 11  | Sel1l                 | sel-1 suppressor of lin-12-like (C. elegans)                       | 4.77E-08 | NM_001039089 /// NM_011344                                   |
| 12  | Smc1a                 | structural maintenance of chromosomes 1A                           | 7.09E-08 | NM_019710                                                    |
| 13  | Ebf2                  | early B-cell factor 2                                              | 8.18E-08 | NM_010095                                                    |
| 14  | Fzd4                  | frizzled homolog 4 (Drosophila)                                    | 8.58E-08 | NM_008055                                                    |
| 15  | Plbd2                 | phospholipase B domain containing 2                                | 1.01E-07 | NM_023625                                                    |
| 16  | Enah                  | enabled homolog (Drosophila)                                       | 1.13E-07 | NM_001083120 /// NM_001083121 /// NM_008680 /// NM_010135    |
| 17  | Tubb2b                | tubulin, beta 2B                                                   | 1.27E-07 | NM_023716                                                    |
| 18  | Ssr1                  | signal sequence receptor, alpha                                    | 1.29E-07 | NM_025965                                                    |
| 19  | Gdap2                 | ganglioside-induced differentiation-associated-protein 2           | 1.40E-07 | NM_010269                                                    |
| 20  | Rgs4                  | regulator of G-protein signaling 4                                 | 1.47E-07 | NM_009062                                                    |
| 21  | Tshz1                 | teashirt zinc finger family member 1                               | 1.53E-07 | NM_001081300                                                 |
| 22  | ---                   | ---                                                                | 1.63E-07 | ---                                                          |
| 23  | Tmem134               | transmembrane protein 134                                          | 1.66E-07 | NM_001078649 /// NM_025889                                   |
| 24  | Serbp1                | serpine1 mRNA binding protein 1                                    | 1.68E-07 | NM_001113564 /// NM_001113565 /// NM_001113566 /// NM_025814 |
| 25  | Gipc1                 | GIPC PDZ domain containing family, member 1                        | 1.84E-07 | NM_018771                                                    |
| 26  | Phf17                 | PHD finger protein 17                                              | 1.88E-07 | NM_001130184 /// NM_001130185 /// NM_001130186 /// NM_172303 |
| 27  | Elf2ak3               | eukaryotic translation initiation factor 2 alpha kinase 3          | 1.92E-07 | NM_010121                                                    |
| 28  | Rock2                 | Rho-associated coiled-coil containing protein kinase 2             | 1.92E-07 | NM_009072                                                    |
| 29  | Usp34                 | ubiquitin specific peptidase 34                                    | 2.18E-07 | XM_483996                                                    |
| 30  | B3gat3                | beta-1,3-glucuronyltransferase 3 (glucuronosyltransferase I)       | 2.18E-07 | NM_024256                                                    |
| 31  | Wnk1                  | WNK lysine deficient protein kinase 1                              | 2.29E-07 | NM_198703                                                    |
| 32  | Cep290                | centrosomal protein 290                                            | 2.39E-07 | NM_146009                                                    |
| 33  | Lpp                   | LIM domain containing preferred translocation partner in lipoma    | 2.42E-07 | NM_001145952 /// NM_001145954 /// NM_178665                  |
| 34  | Rsrc2                 | arginine/serine-rich coiled-coil 2                                 | 2.67E-07 | NM_001005523 /// NM_001005525 /// NM_025438                  |
| 35  | Mela                  | melanoma antigen                                                   | 2.72E-07 | NM_008581                                                    |
| 36  | Nol3                  | nucleolar protein 3 (apoptosis repressor with CARD domain)         | 2.75E-07 | NM_030152                                                    |
| 37  | LOC100048413 /// Mlf2 | similar to Myeloid leukemia factor 2 /// myeloid leukemia factor 2 | 2.84E-07 | NM_145385 /// XM_001480186                                   |
| 38  | Klra17                | killer cell lectin-like receptor, subfamily A, member 17           | 3.09E-07 | NM_133203                                                    |
| 39  | AA517023              | expressed sequence AA517023                                        | 3.17E-07 | ---                                                          |
| 40  | Serpini1              | serine (or cysteine) peptidase inhibitor, clade I, member 1        | 3.22E-07 | NM_009250                                                    |
| 41  | Carhsp1               | calcium regulated heat stable protein 1                            | 3.24E-07 | NM_025821                                                    |
| 42  | Dclk1                 | doublecortin-like kinase 1                                         | 3.68E-07 | NM_001111051 /// NM_001111052 /// NM_001111053 /// NM_019978 |
| 43  | Hist1h3d              | histone cluster 1, H3d                                             | 4.10E-07 | NM_178204                                                    |

|    |                                |                                                                                  |          |                                                              |
|----|--------------------------------|----------------------------------------------------------------------------------|----------|--------------------------------------------------------------|
| 44 | Usp14                          | ubiquitin specific peptidase 14                                                  | 4.29E-07 | NM_001038589 /// NM_021522                                   |
| 45 | Hlcs                           | holocarboxylase synthetase (biotin- [propionyl-Coenzyme A-carboxylase (ATP-hydro | 4.45E-07 | NM_139145                                                    |
| 46 | Akap12                         | A kinase (PRKA) anchor protein (gravin) 12                                       | 4.58E-07 | NM_031185                                                    |
| 47 | Atf7                           | activating transcription factor 7                                                | 4.72E-07 | NM_146065                                                    |
| 48 | Dok3                           | docking protein 3                                                                | 4.73E-07 | NM_013739                                                    |
| 49 | LOC100047840 /// Stap1         | similar to stem cell adaptor protein STAP-1 /// signal transducing adaptor famil | 4.77E-07 | NM_019992 /// XM_001479407 /// XM_001479415                  |
| 50 | Rab25                          | RAB25, member RAS oncogene family                                                | 5.19E-07 | NM_016899                                                    |
| 51 | Gnai1                          | guanine nucleotide binding protein (G protein), alpha inhibiting 1               | 5.44E-07 | NM_010305                                                    |
| 52 | Edem2                          | ER degradation enhancer, mannosidase alpha-like 2                                | 5.88E-07 | NM_145537                                                    |
| 53 | Neu1                           | neuraminidase 1                                                                  | 7.57E-07 | NM_010893                                                    |
| 54 | 2310061J03Rik                  | RIKEN cDNA 2310061J03 gene                                                       | 7.99E-07 | NM_133677 /// NR_027965                                      |
| 55 | Alpl                           | alkaline phosphatase, liver/bone/kidney                                          | 8.49E-07 | NM_007431                                                    |
| 56 | Atrx                           | alpha thalassemia/mental retardation syndrome X-linked homolog (human)           | 8.51E-07 | NM_009530                                                    |
| 57 | Elf2ak3 /// LOC100047634       | eukaryotic translation initiation factor 2 alpha kinase 3 /// similar to Eukaryo | 8.96E-07 | NM_010121 /// XR_032896                                      |
| 58 | Ssx2ip                         | synovial sarcoma, X breakpoint 2 interacting protein                             | 8.96E-07 | NM_138744                                                    |
| 59 | Tanc1                          | tetratricopeptide repeat, ankyrin repeat and coiled-coil containing 1            | 9.87E-07 | NM_198294                                                    |
| 60 | Usf1                           | upstream transcription factor 1                                                  | 9.99E-07 | NM_009480                                                    |
| 61 | Nedd4                          | neural precursor cell expressed, developmentally down-regulated 4                | 1.00E-06 | NM_010890                                                    |
| 62 | Pdik11                         | PDLIM1 interacting kinase 1 like                                                 | 1.05E-06 | NM_001163794 /// NM_146156                                   |
| 63 | Trib2                          | tribbles homolog 2 (Drosophila)                                                  | 1.24E-06 | NM_144551 /// XM_001474232 /// XM_001480364                  |
| 64 | Mela                           | Melanoma antigen                                                                 | 1.24E-06 | NM_008581                                                    |
| 65 | Nap113                         | nucleosome assembly protein 1-like 3                                             | 1.32E-06 | NM_138742                                                    |
| 66 | Rfc1                           | replication factor C (activator 1) 1                                             | 1.43E-06 | NM_011258                                                    |
| 67 | Abcg2                          | ATP-binding cassette, sub-family G (WHITE), member 2                             | 1.48E-06 | NM_011920                                                    |
| 68 | Mtf2                           | metal response element binding transcription factor 2                            | 1.93E-06 | NM_013827                                                    |
| 69 | Rab3d                          | RAB3D, member RAS oncogene family                                                | 1.94E-06 | NM_031874                                                    |
| 70 | Enah                           | enabled homolog (Drosophila)                                                     | 1.96E-06 | NM_001083120 /// NM_001083121 /// NM_008680 /// NM_010135    |
| 71 | Cpsf2                          | cleavage and polyadenylation specific factor 2                                   | 2.02E-06 | NM_016856                                                    |
| 72 | Dclk1                          | doublecortin-like kinase 1                                                       | 2.08E-06 | NM_001111051 /// NM_001111052 /// NM_001111053 /// NM_019978 |
| 73 | Atg4d                          | autophagy-related 4D (yeast)                                                     | 2.10E-06 | NM_153583                                                    |
| 74 | ---                            | ---                                                                              | 2.15E-06 | ---                                                          |
| 75 | Commd5                         | COMM domain containing 5                                                         | 2.24E-06 | NM_025536                                                    |
| 76 | Cdc5l                          | cell division cycle 5-like (S. pombe)                                            | 2.37E-06 | NM_152810                                                    |
| 77 | Bzw2                           | basic leucine zipper and W2 domains 2                                            | 2.37E-06 | NM_025840                                                    |
| 78 | Kdm5a                          | lysine (K)-specific demethylase 5A                                               | 2.65E-06 | NM_145997 /// XM_359326 /// XM_925213 /// XM_979596          |
| 79 | Lipt1                          | lipoyltransferase 1                                                              | 2.81E-06 | NM_001037918                                                 |
| 80 | Lamc1                          | laminin, gamma 1                                                                 | 2.90E-06 | NM_010683                                                    |
| 81 | Txnrd1                         | thioredoxin reductase 1                                                          | 2.97E-06 | NM_001042513 /// NM_001042514 /// NM_001042523 /// NM_015762 |
| 82 | Ccng2                          | cyclin G2                                                                        | 3.00E-06 | NM_007635                                                    |
| 83 | Xiap                           | X-linked inhibitor of apoptosis                                                  | 3.08E-06 | NM_009688                                                    |
| 84 | P2ry14                         | purinergic receptor P2Y, G-protein coupled, 14                                   | 3.11E-06 | NM_001008497 /// NM_133200                                   |
| 85 | Birc6                          | baculoviral IAP repeat-containing 6                                              | 3.18E-06 | NM_007566                                                    |
| 86 | Tmem9                          | transmembrane protein 9                                                          | 3.24E-06 | NM_001160145 /// NM_001160146 /// NM_025439                  |
| 87 | 1190002N15Rik /// LOC100044725 | RIKEN cDNA 1190002N15 gene /// hypothetical protein LOC100044725                 | 3.50E-06 | NM_001033145 /// XM_001472923                                |
| 88 | Cited2                         | Cbp/p300-interacting transactivator, with Glu/Asp-rich carboxy-terminal domain,  | 3.60E-06 | NM_010828                                                    |
| 89 | Cbx5                           | chromobox homolog 5 (Drosophila HP1a)                                            | 3.63E-06 | NM_001076789 /// NM_001110216 /// NM_007626                  |



|     |                      |                                                                                  |          |                                             |
|-----|----------------------|----------------------------------------------------------------------------------|----------|---------------------------------------------|
| 90  | Serf1                | small EDRK-rich factor 1                                                         | 3.73E-06 | NM_011353                                   |
| 91  | Ccr9                 | chemokine (C-C motif) receptor 9                                                 | 4.05E-06 | NM_009913                                   |
| 92  | Mela                 | melanoma antigen                                                                 | 4.09E-06 | NM_008581                                   |
| 93  | Arsg                 | arylsulfatase G                                                                  | 4.10E-06 | NM_028710                                   |
| 94  | Snx18                | sorting nexin 18                                                                 | 4.14E-06 | NM_130796                                   |
| 95  | Bmi1                 | Bmi1 polycomb ring finger oncogene                                               | 4.65E-06 | NM_007552                                   |
| 96  | Hdac11               | histone deacetylase 11                                                           | 4.80E-06 | NM_144919                                   |
| 97  | Usp5                 | ubiquitin specific peptidase 5 (isopeptidase T)                                  | 5.05E-06 | NM_013700                                   |
| 98  | Ptrh1                | peptidyl-tRNA hydrolase 1 homolog (S. cerevisiae)                                | 5.18E-06 | NM_178595                                   |
| 99  | Elf2                 | E74-like factor 2                                                                | 5.23E-06 | NM_023502                                   |
| 100 | Chac2                | ChaC, cation transport regulator homolog 2 (E. coli)                             | 5.51E-06 | NM_026527                                   |
| 101 | ---                  | ---                                                                              | 5.54E-06 | ---                                         |
| 102 | Kcnn4                | potassium intermediate/small conductance calcium-activated channel, subfamily N, | 5.80E-06 | NM_001163510 /// NM_008433                  |
| 103 | Pgs1                 | phosphatidylglycerophosphate synthase 1                                          | 6.61E-06 | NM_133757                                   |
| 104 | A230046K03Rik        | RIKEN cDNA A230046K03 gene                                                       | 6.73E-06 | NM_001033375                                |
| 105 | Ebf3                 | early B-cell factor 3                                                            | 7.11E-06 | NM_001113414 /// NM_001113415 /// NM_010096 |
| 106 | Ckap4                | cytoskeleton-associated protein 4                                                | 7.25E-06 | NM_175451                                   |
| 107 | Jam2                 | junction adhesion molecule 2                                                     | 7.39E-06 | NM_023844                                   |
| 108 | Spint2               | serine protease inhibitor, Kunitz type 2                                         | 7.46E-06 | NM_001082548 /// NM_011464                  |
| 109 | Cbl /// LOC100048010 | Casitas B-lineage lymphoma /// similar to Casitas B-lineage lymphoma             | 7.65E-06 | NM_007619 /// XR_034155                     |
| 110 | Rbx1                 | ring-box 1                                                                       | 7.79E-06 | NM_019712                                   |
| 111 | Ndn                  | necdin                                                                           | 7.89E-06 | NM_010882                                   |
| 112 | Derl2                | Der1-like domain family, member 2                                                | 7.93E-06 | NM_033562                                   |
| 113 | Stxbp2               | syntaxin binding protein 2                                                       | 8.05E-06 | NM_011503                                   |
| 114 | Rap2b                | RAP2B, member of RAS oncogene family                                             | 8.06E-06 | NM_028712                                   |
| 115 | Rnf38                | ring finger protein 38                                                           | 8.14E-06 | NM_001038993 /// NM_175201                  |
| 116 | 3830406C13Rik        | RIKEN cDNA 3830406C13 gene                                                       | 8.36E-06 | NM_146051 /// NM_178141                     |
| 117 | Emb                  | embigin                                                                          | 8.72E-06 | NM_010330                                   |
| 118 | Wdr54                | WD repeat domain 54                                                              | 9.09E-06 | NM_023790                                   |
| 119 | Zfp148               | zinc finger protein 148                                                          | 9.26E-06 | NM_011749                                   |
| 120 | Ppp1r2               | protein phosphatase 1, regulatory (inhibitor) subunit 2                          | 9.30E-06 | NM_025800                                   |
| 121 | Fam20b               | family with sequence similarity 20, member B                                     | 9.33E-06 | NM_145413                                   |
| 122 | Ttc14                | tetratricopeptide repeat domain 14                                               | 9.42E-06 | NM_025978 /// NM_027619                     |
| 123 | Jmjd6                | jumonji domain containing 6                                                      | 1.00E-05 | NM_033398                                   |
| 124 | Kif16b               | kinesin family member 16B                                                        | 1.01E-05 | NM_001081133                                |
| 125 | Ncln                 | nicalin homolog (zebrafish)                                                      | 1.02E-05 | NM_134009                                   |
| 126 | Fam98c               | family with sequence similarity 98, member C                                     | 1.03E-05 | NM_001146023 /// NM_028661                  |
| 127 | Csnk1e               | casein kinase 1, epsilon                                                         | 1.04E-05 | NM_013767                                   |
| 128 | Sdc4                 | syndecan 4                                                                       | 1.04E-05 | NM_011521                                   |
| 129 | 4732418C07Rik        | RIKEN cDNA 4732418C07 gene                                                       | 1.07E-05 | NM_172698                                   |
| 130 | Kif16b               | kinesin family member 16B                                                        | 1.10E-05 | NM_001081133                                |
| 131 | Gtpbp4               | GTP binding protein 4                                                            | 1.12E-05 | NM_027000                                   |
| 132 | Vpreb3               | pre-B lymphocyte gene 3                                                          | 1.13E-05 | NM_009514                                   |
| 133 | D6Wsu116e            | DNA segment, Chr 6, Wayne State University 116, expressed                        | 1.16E-05 | NM_026585                                   |
| 134 | Diap2                | diaphanous homolog 2 (Drosophila)                                                | 1.16E-05 | NM_017398 /// NM_172493                     |
| 135 | 1810063B05Rik        | RIKEN cDNA 1810063B05 gene                                                       | 1.17E-05 | NM_174987                                   |

|     |                        |                                                                                  |          |                                                                 |
|-----|------------------------|----------------------------------------------------------------------------------|----------|-----------------------------------------------------------------|
| 136 | Snap23                 | synaptosomal-associated protein 23                                               | 1.18E-05 | NM_009222                                                       |
| 137 | Ahcy1                  | S-adenosylhomocysteine hydrolase-like 1                                          | 1.22E-05 | NM_145542                                                       |
| 138 | Sptlc1                 | serine palmitoyltransferase, long chain base subunit 1                           | 1.23E-05 | NM_009269                                                       |
| 139 | BC013529               | cDNA sequence BC013529                                                           | 1.24E-05 | NM_145418                                                       |
| 140 | ---                    | ---                                                                              | 1.25E-05 | ---                                                             |
| 141 | Drap1                  | Dr1 associated protein 1 (negative cofactor 2 alpha)                             | 1.25E-05 | NM_024176                                                       |
| 142 | Cldn6                  | claudin 6                                                                        | 1.28E-05 | NM_018777                                                       |
| 143 | Mgat2                  | mannoside acetylglucosaminyltransferase 2                                        | 1.31E-05 | NM_146035                                                       |
| 144 | Ppil2                  | peptidylprolyl isomerase (cyclophilin)-like 2                                    | 1.32E-05 | NM_144954                                                       |
| 145 | Dedd2                  | death effector domain-containing DNA binding protein 2                           | 1.32E-05 | NM_207677                                                       |
| 146 | Tmem49                 | transmembrane protein 49                                                         | 1.35E-05 | NM_029478                                                       |
| 147 | ---                    | ---                                                                              | 1.40E-05 | ---                                                             |
| 148 | Tor2a                  | torsin family 2, member A                                                        | 1.42E-05 | NM_152800                                                       |
| 149 | Cd36                   | CD36 antigen                                                                     | 1.46E-05 | NM_001159555 /// NM_001159556 /// NM_001159557 /// NM_001159558 |
| 150 | Ssx2ip                 | synovial sarcoma, X breakpoint 2 interacting protein                             | 1.55E-05 | NM_138744                                                       |
| 151 | Scrn2                  | secernin 2                                                                       | 1.57E-05 | NM_146027                                                       |
| 152 | Clec14a                | C-type lectin domain family 14, member a                                         | 1.59E-05 | NM_025809                                                       |
| 153 | Farp2                  | FERM, RhoGEF and pleckstrin domain protein 2                                     | 1.60E-05 | NM_145519                                                       |
| 154 | Plxnc1                 | plexin C1                                                                        | 1.61E-05 | NM_018797                                                       |
| 155 | BC003940               | cDNA sequence BC003940                                                           | 1.63E-05 | NM_001033231                                                    |
| 156 | Sf3a3                  | splicing factor 3a, subunit 3                                                    | 1.71E-05 | NM_029157                                                       |
| 157 | Ndn                    | necdin                                                                           | 1.72E-05 | NM_010882                                                       |
| 158 | Limch1                 | LIM and calponin homology domains 1                                              | 1.74E-05 | NM_001001980                                                    |
| 159 | Thoc2                  | THO complex 2                                                                    | 1.75E-05 | NM_001033422                                                    |
| 160 | Tspyl1                 | testis-specific protein, Y-encoded-like 1                                        | 1.83E-05 | NM_009433                                                       |
| 161 | Tpp2                   | tripeptidyl peptidase II                                                         | 1.86E-05 | NM_009418                                                       |
| 162 | Igh-6                  | immunoglobulin heavy chain 6 (heavy chain of IgM)                                | 1.87E-05 | ---                                                             |
| 163 | Csnk1d                 | casein kinase 1, delta                                                           | 1.92E-05 | NM_027874 /// NM_139059                                         |
| 164 | Clcn5                  | chloride channel 5                                                               | 1.94E-05 | NM_016691                                                       |
| 165 | Comm5                  | COMM domain containing 5                                                         | 2.04E-05 | NM_025536                                                       |
| 166 | Swap70                 | SWA-70 protein                                                                   | 2.05E-05 | NM_009302                                                       |
| 167 | Agap3                  | ArfGAP with GTPase domain, ankyrin repeat and PH domain 3                        | 2.06E-05 | NM_139153                                                       |
| 168 | Gba                    | glucosidase, beta, acid                                                          | 2.07E-05 | NM_001077411 /// NM_008094                                      |
| 169 | Rabggta                | Rab geranylgeranyl transferase, a subunit                                        | 2.07E-05 | NM_019519                                                       |
| 170 | Lig12 /// LOC100047332 | lethal giant larvae homolog 2 (Drosophila) /// similar to Lethal giant larvae ho | 2.07E-05 | NM_145438 /// XR_033868                                         |
| 171 | Gnb3                   | guanine nucleotide binding protein (G protein), beta 3                           | 2.13E-05 | NM_013530                                                       |
| 172 | Tek                    | endothelial-specific receptor tyrosine kinase                                    | 2.15E-05 | NM_013690                                                       |
| 173 | Epha8                  | Eph receptor A8                                                                  | 2.19E-05 | NM_007939                                                       |
| 174 | Apbb2                  | amyloid beta (A4) precursor protein-binding, family B, member 2                  | 2.19E-05 | NM_009686                                                       |
| 175 | Ttyh2                  | tweety homolog 2 (Drosophila)                                                    | 2.20E-05 | NM_053273                                                       |
| 176 | Eprs                   | glutamyl-prolyl-tRNA synthetase                                                  | 2.28E-05 | NM_029735                                                       |
| 177 | Fermt2                 | fermitin family homolog 2 (Drosophila)                                           | 2.32E-05 | NM_146054                                                       |
| 178 | Amz2                   | archaealysin family metallopeptidase 2                                           | 2.34E-05 | NM_025275                                                       |
| 179 | Igf2r                  | insulin-like growth factor 2 receptor                                            | 2.34E-05 | NM_010515                                                       |
| 180 | 1810044D09RIK          | RIKEN cDNA 1810044D09 gene                                                       | 2.38E-05 | ---                                                             |
| 181 | Foxj3                  | forkhead box J3                                                                  | 2.40E-05 | NM_172699                                                       |

|     |                       |                                                                                  |          |                                             |
|-----|-----------------------|----------------------------------------------------------------------------------|----------|---------------------------------------------|
| 182 | Thns12                | threonine synthase-like 2 (bacterial)                                            | 2.46E-05 | NM_001033929 /// NM_178413                  |
| 183 | Zeb1                  | zinc finger E-box binding homeobox 1                                             | 2.46E-05 | NM_011546                                   |
| 184 | Med27                 | mediator complex subunit 27                                                      | 2.50E-05 | NM_026896                                   |
| 185 | Pkp3                  | plakophilin 3                                                                    | 2.50E-05 | NM_001162924 /// NM_019762                  |
| 186 | Psrc1                 | proline/serine-rich coiled-coil 1                                                | 2.50E-05 | NM_019976                                   |
| 187 | Trim24                | tripartite motif-containing 24                                                   | 2.50E-05 | NM_145076                                   |
| 188 | Tmem106b              | transmembrane protein 106B                                                       | 2.58E-05 | NM_027992                                   |
| 189 | Zfp740                | zinc finger protein 740                                                          | 2.58E-05 | NM_153194                                   |
| 190 | Cdc42se2              | CDC42 small effector 2                                                           | 2.60E-05 | NM_178626                                   |
| 191 | 2810021G02Rik         | RIKEN cDNA 2810021G02 gene                                                       | 2.62E-05 | NM_001162922 /// XR_030794 /// XR_032954    |
| 192 | Fzd6                  | frizzled homolog 6 (Drosophila)                                                  | 2.65E-05 | NM_001162494 /// NM_008056                  |
| 193 | Spred1                | sprouty protein with EVH-1 domain 1, related sequence                            | 2.72E-05 | NM_033524                                   |
| 194 | Sfrs2ip               | splicing factor, arginine/serine-rich 2, interacting protein                     | 2.72E-05 | NM_028148                                   |
| 195 | Hnrnp                 | heterogeneous nuclear ribonucleoprotein R                                        | 2.73E-05 | NM_028871                                   |
| 196 | Spata5                | spermatogenesis associated 5                                                     | 2.73E-05 | NM_001163511 /// NM_021343                  |
| 197 | Ddx6                  | DEAD (Asp-Glu-Ala-Asp) box polypeptide 6                                         | 2.82E-05 | NM_001110826 /// NM_007841 /// NM_181324    |
| 198 | Wdly3                 | WD repeat and FYVE domain containing 3                                           | 2.85E-05 | NM_172882                                   |
| 199 | Pcd6ip                | programmed cell death 6 interacting protein                                      | 2.87E-05 | NM_011052                                   |
| 200 | Copg2as2              | coatamer protein complex, subunit gamma 2, antisense 2                           | 2.96E-05 | NR_002845 /// XM_001471930                  |
| 201 | MacroD2               | MACRO domain containing 2                                                        | 3.01E-05 | NM_001013802 /// NM_028387                  |
| 202 | Tfrc                  | transferrin receptor                                                             | 3.14E-05 | NM_011638                                   |
| 203 | Chid1                 | chitinase domain containing 1                                                    | 3.17E-05 | NM_001142681 /// NM_026522                  |
| 204 | Nup155                | nucleoporin 155                                                                  | 3.22E-05 | NM_133227                                   |
| 205 | Mphosph9              | M-phase phosphoprotein 9                                                         | 3.22E-05 | NM_001081323                                |
| 206 | Frdm6                 | FERM domain containing 6                                                         | 3.26E-05 | NM_028127                                   |
| 207 | Ankrd40               | ankyrin repeat domain 40                                                         | 3.27E-05 | NM_027799 /// NM_146024                     |
| 208 | Fkbp8                 | FK506 binding protein 8                                                          | 3.32E-05 | NM_001111066 /// NM_010223                  |
| 209 | Gna13                 | guanine nucleotide binding protein, alpha 13                                     | 3.33E-05 | NM_010303                                   |
| 210 | Abca8a                | ATP-binding cassette, sub-family A (ABC1), member 8a                             | 3.39E-05 | NM_153145                                   |
| 211 | Tusc2                 | tumor suppressor candidate 2                                                     | 3.43E-05 | NM_019742                                   |
| 212 | Prkcz                 | protein kinase C, zeta                                                           | 3.50E-05 | NM_001039079 /// NM_008860                  |
| 213 | Art3                  | ADP-ribosyltransferase 3                                                         | 3.56E-05 | NM_181728                                   |
| 214 | LOC100043998 /// Tpr  | similar to nuclear pore complex-associated intranuclear coiled-coil protein TPR  | 3.58E-05 | NM_133780 /// XM_001474137                  |
| 215 | Ppt1                  | palmitoyl-protein thioesterase 1                                                 | 3.63E-05 | NM_008917                                   |
| 216 | 2610101N10Rik         | RIKEN cDNA 2610101N10 gene                                                       | 3.67E-05 | NM_001114977 /// NM_026476                  |
| 217 | Emb                   | embigin                                                                          | 3.67E-05 | NM_010330                                   |
| 218 | Tnfrsf13c             | tumor necrosis factor receptor superfamily, member 13c                           | 3.73E-05 | NM_028075                                   |
| 219 | Kdm5c                 | lysine (K)-specific demethylase 5C                                               | 3.76E-05 | NM_013668                                   |
| 220 | Amfr /// LOC100046262 | autocrine motility factor receptor /// similar to Autocrine motility factor rece | 3.80E-05 | NM_011787 /// XM_001475898                  |
| 221 | Aoc3                  | amine oxidase, copper containing 3                                               | 3.80E-05 | NM_009675                                   |
| 222 | Tgfb2                 | transforming growth factor, beta receptor II                                     | 3.97E-05 | NM_009371 /// NM_029575                     |
| 223 | Smc1a                 | structural maintenance of chromosomes 1A                                         | 3.97E-05 | NM_019710                                   |
| 224 | Myo1b                 | myosin IB                                                                        | 4.00E-05 | NM_001161817 /// NM_010863                  |
| 225 | Colec12               | collectin sub-family member 12                                                   | 4.01E-05 | NM_130449                                   |
| 226 | Taok1                 | TAO kinase 1                                                                     | 4.06E-05 | NM_144825                                   |
| 227 | Cbx5                  | chromobox homolog 5 (Drosophila HP1a)                                            | 4.12E-05 | NM_001076789 /// NM_001110216 /// NM_007626 |

|     |                        |                                                                           |          |                                                              |
|-----|------------------------|---------------------------------------------------------------------------|----------|--------------------------------------------------------------|
| 228 | Klc1                   | kinesin light chain 1                                                     | 4.13E-05 | NM_001025360 /// NM_001081959 /// NM_008450                  |
| 229 | Entpd2                 | ectonucleoside triphosphate diphosphohydrolase 2                          | 4.14E-05 | NM_009849                                                    |
| 230 | Rchy1                  | ring finger and CHY zinc finger domain containing 1                       | 4.16E-05 | NM_026557                                                    |
| 231 | Rffl                   | ring finger and FYVE like domain containing protein                       | 4.18E-05 | NM_001007465 /// NM_026097                                   |
| 232 | MacroD1                | MACRO domain containing 1                                                 | 4.25E-05 | NM_134147                                                    |
| 233 | Metrn                  | meteorin, glial cell differentiation regulator                            | 4.38E-05 | NM_133719                                                    |
| 234 | Cno                    | cappuccino                                                                | 4.39E-05 | NM_133724                                                    |
| 235 | Nle1                   | notchless homolog 1 (Drosophila)                                          | 4.44E-05 | NM_145431                                                    |
| 236 | Enah                   | enabled homolog (Drosophila)                                              | 4.45E-05 | NM_001083120 /// NM_001083121 /// NM_008680 /// NM_010135    |
| 237 | Tpp2                   | tripeptidyl peptidase II                                                  | 4.51E-05 | NM_009418                                                    |
| 238 | Arsg                   | arylsulfatase G                                                           | 4.57E-05 | NM_028710                                                    |
| 239 | Itsn2                  | intersectin 2                                                             | 4.73E-05 | NM_011365                                                    |
| 240 | Tbc1d15                | TBC1 domain family, member 15                                             | 4.73E-05 | NM_025706                                                    |
| 241 | Ccdc77                 | coiled-coil domain containing 77                                          | 4.80E-05 | NM_026028                                                    |
| 242 | Entpd1                 | ectonucleoside triphosphate diphosphohydrolase 1                          | 4.88E-05 | NM_009848                                                    |
| 243 | Zfp53                  | zinc finger protein 53                                                    | 4.91E-05 | NM_013843                                                    |
| 244 | Luzp1                  | leucine zipper protein 1                                                  | 5.04E-05 | NM_024452                                                    |
| 245 | Ttc3                   | tetratricopeptide repeat domain 3                                         | 5.04E-05 | NM_009441                                                    |
| 246 | Ttc8                   | tetratricopeptide repeat domain 8                                         | 5.09E-05 | NM_029553 /// NM_198311                                      |
| 247 | Adam8                  | a disintegrin and metallopeptidase domain 8                               | 5.16E-05 | NM_007403                                                    |
| 248 | Mapk11                 | mitogen-activated protein kinase 11                                       | 5.18E-05 | NM_011161                                                    |
| 249 | LOC100046080 /// Spin1 | similar to Spindlin 1 /// spindlin 1                                      | 5.23E-05 | NM_011462 /// NM_146043 /// XM_001475418 /// XM_001475434    |
| 250 | Mphosph9               | M-phase phosphoprotein 9                                                  | 5.27E-05 | NM_001081323                                                 |
| 251 | Gpr172b                | G protein-coupled receptor 172B                                           | 5.28E-05 | NM_029643                                                    |
| 252 | Ppargc1b               | peroxisome proliferative activated receptor, gamma, coactivator 1 beta    | 5.34E-05 | NM_133249                                                    |
| 253 | Serpini1               | serine (or cysteine) peptidase inhibitor, clade I, member 1               | 5.35E-05 | NM_009250                                                    |
| 254 | Csnk1e                 | casein kinase 1, epsilon                                                  | 5.38E-05 | NM_013767                                                    |
| 255 | Spata13                | spermatogenesis associated 13                                             | 5.47E-05 | NM_001033272 /// XM_901902 /// XM_923227                     |
| 256 | 9130213B05Rik          | RIKEN cDNA 9130213B05 gene                                                | 5.48E-05 | NM_145562                                                    |
| 257 | Slc39a3                | solute carrier family 39 (zinc transporter), member 3                     | 5.52E-05 | NM_134135                                                    |
| 258 | Dclre1b                | DNA cross-link repair 1B, PSO2 homolog (S. cerevisiae)                    | 5.57E-05 | NM_001025312 /// NM_133865                                   |
| 259 | Add3                   | adducin 3 (gamma)                                                         | 5.58E-05 | NM_001164099 /// NM_001164100 /// NM_001164101 /// NM_013758 |
| 260 | Orc2l                  | origin recognition complex, subunit 2-like (S. cerevisiae)                | 5.71E-05 | NM_001025378 /// NM_008765                                   |
| 261 | Taf8                   | TAF8 RNA polymerase II, TATA box binding protein (TBP)-associated factorq | 5.78E-05 | NM_022015                                                    |
| 262 | Crif1                  | cytokine receptor-like factor 1                                           | 5.83E-05 | NM_018827                                                    |
| 263 | Sh3tc1                 | SH3 domain and tetratricopeptide repeats 1                                | 5.84E-05 | NM_194344                                                    |
| 264 | Gmppa                  | GDP-mannose pyrophosphorylase A                                           | 6.07E-05 | NM_133708                                                    |
| 265 | Tmem192                | transmembrane protein 192                                                 | 6.21E-05 | NM_001163747 /// NM_028427                                   |
| 266 | Notch3                 | Notch gene homolog 3 (Drosophila)                                         | 6.23E-05 | NM_008716                                                    |
| 267 | Thrap3                 | thyroid hormone receptor associated protein 3                             | 6.29E-05 | NM_146153                                                    |
| 268 | Crat                   | carnitine acetyltransferase                                               | 6.31E-05 | NM_007760                                                    |
| 269 | Cenpb                  | centromere protein B                                                      | 6.37E-05 | NM_007682                                                    |
| 270 | Sdpr                   | serum deprivation response                                                | 6.39E-05 | NM_138741                                                    |
| 271 | Gclc                   | glutamate-cysteine ligase, catalytic subunit                              | 6.41E-05 | NM_010295                                                    |
| 272 | Rasal2                 | RAS protein activator like 2                                              | 6.47E-05 | NM_177644                                                    |
| 273 | Gpnmb                  | glycoprotein (transmembrane) nmb                                          | 6.60E-05 | NM_053110                                                    |

|     |                          |                                                                                  |          |                                                                 |
|-----|--------------------------|----------------------------------------------------------------------------------|----------|-----------------------------------------------------------------|
| 274 | Ehmt2                    | euchromatic histone lysine N-methyltransferase 2                                 | 6.72E-05 | NM_145830 /// NM_147151                                         |
| 275 | Socs2                    | suppressor of cytokine signaling 2                                               | 6.73E-05 | NM_007706                                                       |
| 276 | Spry2                    | sprouty homolog 2 (Drosophila)                                                   | 6.86E-05 | NM_011897                                                       |
| 277 | Robo1                    | roundabout homolog 1 (Drosophila)                                                | 6.86E-05 | NM_019413                                                       |
| 278 | Btbd3                    | BTB (POZ) domain containing 3                                                    | 6.86E-05 | NM_001025431 /// NM_145534                                      |
| 279 | Hltf                     | helicase-like transcription factor                                               | 6.98E-05 | NM_009210 /// NM_144959                                         |
| 280 | Spna2                    | spectrin alpha 2                                                                 | 7.12E-05 | NM_001076554                                                    |
| 281 | Pcyt2                    | phosphate cytidyltransferase 2, ethanolamine                                     | 7.14E-05 | NM_024229                                                       |
| 282 | Spep                     | SPEG complex locus                                                               | 7.23E-05 | NM_001085370 /// NM_001085371 /// NM_007463                     |
| 283 | Arfgap3 /// LOC100045474 | ADP-ribosylation factor GTPase activating protein 3 /// similar to ADP-ribosylat | 7.31E-05 | NM_025445 /// XR_032156                                         |
| 284 | Cd34                     | CD34 antigen                                                                     | 7.36E-05 | NM_001111059 /// NM_133654                                      |
| 285 | Pdc61p                   | programmed cell death 6 interacting protein                                      | 7.41E-05 | NM_011052                                                       |
| 286 | Atp2a3                   | ATPase, Ca++ transporting, ubiquitous                                            | 7.43E-05 | NM_001163336 /// NM_001163337 /// NM_016745                     |
| 287 | Scand1                   | SCAN domain-containing 1                                                         | 7.50E-05 | NM_020255                                                       |
| 288 | 2610002J02Rik            | RIKEN cDNA 2610002J02 gene                                                       | 7.50E-05 | NM_001033134                                                    |
| 289 | Jak1                     | Janus kinase 1                                                                   | 7.52E-05 | NM_146145                                                       |
| 290 | Wbp1                     | WW domain binding protein 1                                                      | 7.53E-05 | NM_001083922 /// NM_001083923 /// NM_016757                     |
| 291 | Rps6ka2                  | ribosomal protein S6 kinase, polypeptide 2                                       | 7.60E-05 | NM_011299                                                       |
| 292 | Hoxd8                    | homeo box D8                                                                     | 7.81E-05 | NM_008276                                                       |
| 293 | Rnf167                   | ring finger protein 167                                                          | 7.88E-05 | NM_027445 /// XM_001471737                                      |
| 294 | Med23                    | mediator complex subunit 23                                                      | 7.89E-05 | NM_027347                                                       |
| 295 | Syncrip                  | synaptotagmin binding, cytoplasmic RNA interacting protein                       | 7.90E-05 | NM_019666 /// NM_019796                                         |
| 296 | LOC100047864 /// Snx6    | similar to sorting nexin 6 /// sorting nexin 6                                   | 8.05E-05 | NM_026998 /// XM_001479028                                      |
| 297 | Sharpin                  | SHANK-associated RH domain interacting protein                                   | 8.10E-05 | NM_025340                                                       |
| 298 | Mef2c                    | myocyte enhancer factor 2C                                                       | 8.23E-05 | NM_025282                                                       |
| 299 | Dicer1                   | Dicer1, Dcr-1 homolog (Drosophila)                                               | 8.24E-05 | NM_148948                                                       |
| 300 | Igh-6                    | immunoglobulin heavy chain 6 (heavy chain of IgM)                                | 8.27E-05 | ---                                                             |
| 301 | Rab30                    | RAB30, member RAS oncogene family                                                | 8.37E-05 | NM_029494                                                       |
| 302 | Aspm                     | asp (abnormal spindle)-like, microcephaly associated (Drosophila)                | 8.38E-05 | NM_009791                                                       |
| 303 | Ttc39b                   | tetratricopeptide repeat domain 39B                                              | 8.47E-05 | NM_027238                                                       |
| 304 | G6pc3                    | glucose 6 phosphatase, catalytic, 3                                              | 8.54E-05 | NM_175935                                                       |
| 305 | Eltf1                    | EGF, latrophilin seven transmembrane domain containing 1                         | 8.61E-05 | NM_133222                                                       |
| 306 | Ankrd40                  | ankyrin repeat domain 40                                                         | 8.76E-05 | NM_027799 /// NM_146024                                         |
| 307 | Pfkf1                    | PFTAIRE protein kinase 1                                                         | 8.77E-05 | NM_011074                                                       |
| 308 | Cnot4                    | CCR4-NOT transcription complex, subunit 4                                        | 8.77E-05 | NM_001164411 /// NM_001164412 /// NM_001164413 /// NM_001164414 |
| 309 | Atrx                     | alpha thalassemia/mental retardation syndrome X-linked homolog (human)           | 8.95E-05 | NM_009530                                                       |
| 310 | Sema3f                   | sema domain, immunoglobulin domain (Ig), short basic domain, secreted, (semapho  | 9.02E-05 | NM_011349                                                       |
| 311 | Asb3                     | ankyrin repeat and SOCS box-containing 3                                         | 9.04E-05 | NM_023906                                                       |
| 312 | Sp1                      | trans-acting transcription factor 1                                              | 9.05E-05 | NM_013672                                                       |
| 313 | Nr2f6                    | nuclear receptor subfamily 2, group F, member 6                                  | 9.06E-05 | NM_010150                                                       |
| 314 | Rasa1                    | RAS p21 protein activator 1                                                      | 9.09E-05 | NM_145452                                                       |
| 315 | Klc3                     | kinesin light chain 3                                                            | 9.15E-05 | NM_146182                                                       |
| 316 | Kif4                     | kinesin family member 4                                                          | 9.17E-05 | NM_008446                                                       |
| 317 | Praf2                    | PRA1 domain family 2                                                             | 9.26E-05 | NM_138602                                                       |
| 318 | Stub1                    | STIP1 homology and U-Box containing protein 1                                    | 9.31E-05 | NM_019719                                                       |
| 319 | Akt1                     | thymoma viral proto-oncogene 1                                                   | 9.42E-05 | NM_009652                                                       |

|     |                         |                                                                                   |          |                                                                 |
|-----|-------------------------|-----------------------------------------------------------------------------------|----------|-----------------------------------------------------------------|
| 320 | Tnrc6a                  | trinucleotide repeat containing 6a                                                | 9.46E-05 | NM_144925                                                       |
| 321 | Rell1                   | RELT-like 1                                                                       | 9.48E-05 | NM_145923                                                       |
| 322 | Hsd3b3                  | hydroxy-delta-5-steroid dehydrogenase, 3 beta- and steroid delta-isomerase 3      | 9.56E-05 | NM_001012306 /// NM_001161742 /// NM_001161743 /// NM_001161744 |
| 323 | Arhgap6                 | Rho GTPase activating protein 6                                                   | 9.89E-05 | NM_009707 /// NM_178754                                         |
| 324 | Ap3b1                   | adaptor-related protein complex 3, beta 1 subunit                                 | 9.91E-05 | NM_009680                                                       |
| 325 | C030006K11Rik           | RIKEN cDNA C030006K11 gene                                                        | 9.95E-05 | NM_145472 /// NM_176828                                         |
| 326 | Nfib                    | nuclear factor I/B                                                                | 1.01E-04 | NM_001113209 /// NM_001113210 /// NM_008687                     |
| 327 | Pus3                    | pseudouridine synthase 3                                                          | 1.03E-04 | NM_023292                                                       |
| 328 | Cebpz                   | CCAAT/enhancer binding protein zeta                                               | 1.03E-04 | NM_001024806                                                    |
| 329 | Klk1b21                 | kallikrein 1-related peptidase b21                                                | 1.03E-04 | NM_010642                                                       |
| 330 | Naglu                   | alpha-N-acetylglucosaminidase (Sanfilippo disease IIIB)                           | 1.05E-04 | NM_013792                                                       |
| 331 | Gpr137b-ps              | G protein-coupled receptor 137B, pseudogene                                       | 1.06E-04 | NR_003568 /// XR_001658                                         |
| 332 | LOC100270747            | hypothetical LOC100270747                                                         | 1.06E-04 | ---                                                             |
| 333 | D1Ert75e                | DNA segment, Chr 1, ERATO Doi 75, expressed                                       | 1.06E-04 | ---                                                             |
| 334 | Il7r                    | interleukin 7 receptor                                                            | 1.09E-04 | NM_008372                                                       |
| 335 | Pex13                   | peroxisomal biogenesis factor 13                                                  | 1.10E-04 | NM_023651                                                       |
| 336 | Galnt2                  | UDP-N-acetyl-alpha-D-galactosamine: polypeptide N-acetylgalactosaminyltransferase | 1.11E-04 | NM_139272                                                       |
| 337 | Gna13                   | guanine nucleotide binding protein, alpha 13                                      | 1.11E-04 | NM_010303                                                       |
| 338 | Pik3ca                  | phosphatidylinositol 3-kinase, catalytic, alpha polypeptide                       | 1.12E-04 | NM_008839                                                       |
| 339 | Rgs3                    | regulator of G-protein signaling 3                                                | 1.14E-04 | NM_001081650 /// NM_019492 /// NM_134257                        |
| 340 | Hipk1                   | homeodomain interacting protein kinase 1                                          | 1.15E-04 | NM_010432                                                       |
| 341 | Eif3a                   | eukaryotic translation initiation factor 3, subunit A                             | 1.18E-04 | NM_010123                                                       |
| 342 | Zfp518b                 | zinc finger protein 518B                                                          | 1.18E-04 | NM_001081144                                                    |
| 343 | Nrp1                    | neuropilin 1                                                                      | 1.18E-04 | NM_008737                                                       |
| 344 | Ctdsp2 /// Gm9770       | CTD (carboxy-terminal domain, RNA polymerase II, polypeptide A) small phosphatase | 1.21E-04 | NM_001113470 /// NM_146012 /// XR_032943 /// XR_034953          |
| 345 | Cpeb3                   | cytoplasmic polyadenylation element binding protein 3                             | 1.22E-04 | NM_198300                                                       |
| 346 | Clcn3                   | chloride channel 3                                                                | 1.23E-04 | NM_007711 /// NM_173873 /// NM_173874 /// NM_173876             |
| 347 | Tram2                   | translocating chain-associating membrane protein 2                                | 1.24E-04 | NM_133252 /// NM_177409                                         |
| 348 | Mapk8                   | mitogen-activated protein kinase 8                                                | 1.26E-04 | NM_016700                                                       |
| 349 | Gab1                    | growth factor receptor bound protein 2-associated protein 1                       | 1.26E-04 | NM_021356                                                       |
| 350 | Ralb                    | v-ras simian leukemia viral oncogene homolog B (ras related)                      | 1.28E-04 | NM_022327                                                       |
| 351 | Flt1                    | FMS-like tyrosine kinase 1                                                        | 1.29E-04 | NM_010228                                                       |
| 352 | Gnai1                   | guanine nucleotide binding protein (G protein), alpha inhibiting 1                | 1.30E-04 | NM_010305                                                       |
| 353 | Tfpi                    | tissue factor pathway inhibitor                                                   | 1.31E-04 | NM_011576                                                       |
| 354 | Fubp1                   | far upstream element (FUSE) binding protein 1                                     | 1.32E-04 | NM_057172                                                       |
| 355 | Gpr137b /// LOC10004497 | G protein-coupled receptor 137B /// similar to Gpr137b protein                    | 1.33E-04 | NM_031999 /// XM_001473441                                      |
| 356 | Usp14                   | ubiquitin specific peptidase 14                                                   | 1.33E-04 | NM_001038589 /// NM_021522                                      |
| 357 | ---                     | ---                                                                               | 1.33E-04 | ---                                                             |
| 358 | Chm                     | choroideremia                                                                     | 1.33E-04 | NM_018818                                                       |
| 359 | Efr3a                   | EFR3 homolog A (S. cerevisiae)                                                    | 1.33E-04 | NM_133766                                                       |
| 360 | Apaf1                   | apoptotic peptidase activating factor 1                                           | 1.35E-04 | NM_001042558 /// NM_009684                                      |
| 361 | B3gnt9                  | UDP-GlcNAc:betaGal beta-1,3-N-acetylglucosaminyltransferase 9                     | 1.37E-04 | NM_178879                                                       |
| 362 | Lpp                     | LIM domain containing preferred translocation partner in lipoma                   | 1.37E-04 | NM_001145952 /// NM_001145954 /// NM_178665                     |
| 363 | Zmym4                   | zinc finger, MYM-type 4                                                           | 1.39E-04 | NM_001114399 /// XM_355521                                      |
| 364 | Slc12a2                 | solute carrier family 12, member 2                                                | 1.39E-04 | NM_009194                                                       |
| 365 | Grhpr                   | glyoxylate reductase/hydroxypyruvate reductase                                    | 1.39E-04 | NM_080289                                                       |

|     |                                       |                                                                                  |          |                                                                   |
|-----|---------------------------------------|----------------------------------------------------------------------------------|----------|-------------------------------------------------------------------|
| 366 | Rnf145                                | ring finger protein 145                                                          | 1.40E-04 | NM_028862                                                         |
| 367 | Slc39a11                              | solute carrier family 39 (metal ion transporter), member 11                      | 1.41E-04 | NM_027216                                                         |
| 368 | Ctr9                                  | Ctr9, Paf1/RNA polymerase II complex component, homolog (S. cerevisiae)          | 1.42E-04 | NM_009431                                                         |
| 369 | Adamts5 /// LOC10004833               | a disintegrin-like and metallopeptidase (repolysin type) with thrombospondin ty  | 1.45E-04 | NM_011782 /// XM_001480027                                        |
| 370 | Dhrs3                                 | dehydrogenase/reductase (SDR family) member 3                                    | 1.46E-04 | NM_011303                                                         |
| 371 | Ggta1                                 | glycoprotein galactosyltransferase alpha 1, 3                                    | 1.46E-04 | NM_001145821 /// NM_010283                                        |
| 372 | Dclre1a                               | DNA cross-link repair 1A, PSO2 homolog (S. cerevisiae)                           | 1.47E-04 | NM_018831                                                         |
| 373 | Ncapg                                 | non-SMC condensin I complex, subunit G                                           | 1.47E-04 | NM_019438 /// XM_485604                                           |
| 374 | Brd8                                  | bromodomain containing 8                                                         | 1.47E-04 | NM_030147                                                         |
| 375 | Gzmb                                  | granzyme B                                                                       | 1.47E-04 | NM_013542                                                         |
| 376 | Phtf2                                 | putative homeodomain transcription factor 2                                      | 1.48E-04 | NM_172992                                                         |
| 377 | Pawr                                  | PRKC, apoptosis, WT1, regulator                                                  | 1.48E-04 | NM_054056                                                         |
| 378 | Pla2g6                                | phospholipase A2, group VI                                                       | 1.48E-04 | NM_016915                                                         |
| 379 | Boc                                   | biregional cell adhesion molecule-related/down-regulated by oncogenes (Cdon) bin | 1.48E-04 | NM_172506                                                         |
| 380 | Prkd3                                 | protein kinase D3                                                                | 1.48E-04 | NM_029239                                                         |
| 381 | Thrap3                                | thyroid hormone receptor associated protein 3                                    | 1.49E-04 | NM_146153                                                         |
| 382 | Airn                                  | antisense Igf2r RNA                                                              | 1.50E-04 | NR_002853 /// NR_027772 /// NR_027773 /// NR_027784               |
| 383 | Tcf25                                 | transcription factor 25 (basic helix-loop-helix)                                 | 1.51E-04 | NM_001037877 /// NM_001037878 /// NM_025804                       |
| 384 | Dstyk                                 | dual serine/threonine and tyrosine protein kinase                                | 1.51E-04 | NM_172516                                                         |
| 385 | Ghr                                   | growth hormone receptor                                                          | 1.51E-04 | NM_001048147 /// NM_001048178 /// NM_010284                       |
| 386 | BC017643                              | cDNA sequence BC017643                                                           | 1.52E-04 | NM_144832                                                         |
| 387 | Mdk                                   | midkine                                                                          | 1.53E-04 | NM_001012335 /// NM_001012336 /// NM_010784                       |
| 388 | Gsn                                   | gelsolin                                                                         | 1.53E-04 | NM_146120                                                         |
| 389 | Tmc6                                  | transmembrane channel-like gene family 6                                         | 1.54E-04 | NM_145439 /// NM_181321                                           |
| 390 | Cox4i2                                | cytochrome c oxidase subunit IV isoform 2                                        | 1.54E-04 | NM_053091                                                         |
| 391 | Ugt1a1 /// Ugt1a10 /// Ugt1a11        | UDP glucuronosyltransferase 1 family, polypeptide A1 /// UDP glycosyltransferase | 1.54E-04 | NM_013701 /// NM_145079 /// NM_201410 /// NM_201641 /// NM_201642 |
| 392 | Nbn                                   | nibrin                                                                           | 1.55E-04 | NM_013752                                                         |
| 393 | Dtx2                                  | deltex 2 homolog (Drosophila)                                                    | 1.55E-04 | NM_023742                                                         |
| 394 | Tnrc6a                                | trinucleotide repeat containing 6a                                               | 1.55E-04 | NM_144925                                                         |
| 395 | Hey1                                  | hairy/enhancer-of-split related with YRPW motif 1                                | 1.56E-04 | NM_010423                                                         |
| 396 | Ncbp1                                 | nuclear cap binding protein subunit 1                                            | 1.58E-04 | NM_001033201                                                      |
| 397 | Zc3h12c                               | zinc finger CCCH type containing 12C                                             | 1.60E-04 | NM_001162921 /// XM_146893 /// XM_917341                          |
| 398 | Postn                                 | periostin, osteoblast specific factor                                            | 1.60E-04 | NM_015784                                                         |
| 399 | Gsn                                   | gelsolin                                                                         | 1.61E-04 | NM_146120                                                         |
| 400 | Csk                                   | c-src tyrosine kinase                                                            | 1.64E-04 | NM_007783                                                         |
| 401 | Pdgfrb                                | platelet derived growth factor receptor, beta polypeptide                        | 1.65E-04 | NM_001146268 /// NM_008809                                        |
| 402 | Luzp1                                 | leucine zipper protein 1                                                         | 1.65E-04 | NM_024452                                                         |
| 403 | Galnt7                                | UDP-N-acetyl-alpha-D-galactosamine: polypeptide N-acetylgalactosaminyltransferas | 1.65E-04 | NM_144731                                                         |
| 404 | Ctsb                                  | cathepsin B                                                                      | 1.66E-04 | NM_007798                                                         |
| 405 | Dgcr14                                | DiGeorge syndrome critical region gene 14                                        | 1.67E-04 | NM_001081633 /// NM_022408                                        |
| 406 | Tubgcp5                               | tubulin, gamma complex associated protein 5                                      | 1.67E-04 | NM_146190                                                         |
| 407 | Hist1h2ad /// Hist1h2an /// Hist1h2af | histone cluster 1, H2ad /// histone cluster 1, H2an /// histone cluster 2, H2aa1 | 1.68E-04 | NM_013549 /// NM_019469 /// NM_175662 /// NM_178184 /// NM_178185 |
| 408 | Pcbp4                                 | poly(rC) binding protein 4                                                       | 1.69E-04 | NM_021567                                                         |
| 409 | Elf2s2                                | eukaryotic translation initiation factor 2, subunit 2 (beta)                     | 1.70E-04 | NM_026030                                                         |
| 410 | Ubtf                                  | upstream binding transcription factor, RNA polymerase I                          | 1.70E-04 | NM_001044383 /// NM_011551                                        |
| 411 | Ttc39b                                | tetratricopeptide repeat domain 39B                                              | 1.70E-04 | NM_027238                                                         |

|     |                             |                                                                                  |          |                                                                 |
|-----|-----------------------------|----------------------------------------------------------------------------------|----------|-----------------------------------------------------------------|
| 412 | Phf17                       | PHD finger protein 17                                                            | 1.71E-04 | NM_001130184 /// NM_001130185 /// NM_001130186 /// NM_172303    |
| 413 | Syngn1                      | synaptogyrin 1                                                                   | 1.71E-04 | NM_009303 /// NM_207708                                         |
| 414 | Repn1                       | replication initiator 1                                                          | 1.71E-04 | NM_001079901 /// NM_001079902 /// NM_001079903 /// NM_001079904 |
| 415 | Sel1l                       | sel-1 suppressor of lin-12-like (C. elegans)                                     | 1.73E-04 | NM_001039089 /// NM_011344                                      |
| 416 | Flad1                       | RFad1, flavin adenine dinucleotide synthetase, homolog (yeast)                   | 1.73E-04 | NM_177041                                                       |
| 417 | 1110032E23Rik               | RIKEN cDNA 1110032E23 gene                                                       | 1.74E-04 | NM_133187                                                       |
| 418 | Igf1                        | insulin-like growth factor 1                                                     | 1.75E-04 | NM_001111274 /// NM_001111275 /// NM_001111276 /// NM_010512 /  |
| 419 | Ccdc6                       | coiled-coil domain containing 6                                                  | 1.76E-04 | NM_001111121 /// XM_618775 /// XM_908442                        |
| 420 | Sec14l2                     | SEC14-like 2 (S. cerevisiae)                                                     | 1.77E-04 | NM_144520                                                       |
| 421 | Cenpe                       | centromere protein E                                                             | 1.77E-04 | NM_173762                                                       |
| 422 | Sipa1l2                     | signal-induced proliferation-associated 1 like 2                                 | 1.78E-04 | NM_001081337                                                    |
| 423 | Tspan6                      | tetraspanin 6                                                                    | 1.79E-04 | NM_019656                                                       |
| 424 | Huwe1                       | HECT, UBA and WWE domain containing 1                                            | 1.80E-04 | NM_021523                                                       |
| 425 | Bzw1                        | basic leucine zipper and W2 domains 1                                            | 1.81E-04 | NM_025824                                                       |
| 426 | Cadm1                       | cell adhesion molecule 1                                                         | 1.82E-04 | NM_001025600 /// NM_018770 /// NM_207675 /// NM_207676          |
| 427 | Ssrp1                       | structure specific recognition protein 1                                         | 1.83E-04 | NM_001136081 /// NM_182990                                      |
| 428 | Ear1 /// Ear12 /// Ear2 /// | eosinophil-associated, ribonuclease A family, member 1 /// eosinophil-associated | 1.84E-04 | NM_001012766 /// NM_007894 /// NM_007895 /// NM_017388          |
| 429 | Sorbs1                      | sorbin and SH3 domain containing 1                                               | 1.87E-04 | NM_001034962 /// NM_001034963 /// NM_001034964 /// NM_009166 /  |
| 430 | Rgs14                       | regulator of G-protein signaling 14                                              | 1.88E-04 | NM_016758                                                       |
| 431 | Syncrip                     | synaptotagmin binding, cytoplasmic RNA interacting protein                       | 1.89E-04 | NM_019666 /// NM_019796                                         |
| 432 | Sec63                       | SEC63-like (S. cerevisiae)                                                       | 1.92E-04 | NM_153055                                                       |
| 433 | Chmp1b                      | chromatin modifying protein 1B                                                   | 1.93E-04 | NM_024190                                                       |
| 434 | Arg2                        | arginase type II                                                                 | 1.94E-04 | NM_009705                                                       |
| 435 | Nt5c3l                      | 5'-nucleotidase, cytosolic III-like                                              | 1.97E-04 | NM_001102650 /// NM_026561                                      |
| 436 | Igfbp3                      | insulin-like growth factor binding protein 3                                     | 1.98E-04 | NM_008343                                                       |
| 437 | Prrx1                       | paired related homeobox 1                                                        | 1.99E-04 | NM_001025570 /// NM_011127 /// NM_175686                        |
| 438 | Jak1                        | Janus kinase 1                                                                   | 1.99E-04 | NM_146145                                                       |
| 439 | Ifngr2                      | interferon gamma receptor 2                                                      | 2.02E-04 | NM_008338                                                       |
| 440 | 1200009O22Rik               | RIKEN cDNA 1200009O22 gene                                                       | 2.02E-04 | NM_025817                                                       |
| 441 | 6820431F20Rik               | RIKEN cDNA 6820431F20 gene                                                       | 2.05E-04 | XM_001481304                                                    |
| 442 | ---                         | ---                                                                              | 2.07E-04 | ---                                                             |
| 443 | Pofut2                      | protein O-fucosyltransferase 2                                                   | 2.08E-04 | NM_030262                                                       |
| 444 | Trps1                       | trichorhinophalangeal syndrome I (human)                                         | 2.09E-04 | NM_032000                                                       |
| 445 | Impad1                      | inositol monophosphatase domain containing 1                                     | 2.12E-04 | NM_177730                                                       |
| 446 | Sfpq                        | splicing factor proline/glutamine rich (polypyrimidine tract binding protein ass | 2.15E-04 | NM_023603                                                       |
| 447 | Phlda1                      | pleckstrin homology-like domain, family A, member 1                              | 2.16E-04 | NM_009344                                                       |
| 448 | Itih5                       | inter-alpha (globulin) inhibitor H5                                              | 2.16E-04 | NM_172471                                                       |
| 449 | Fam100b                     | family with sequence similarity 100, member B                                    | 2.17E-04 | NM_176902                                                       |
| 450 | Tnfsf10                     | tumor necrosis factor (ligand) superfamily, member 10                            | 2.21E-04 | NM_009425                                                       |
| 451 | Tex261                      | testis expressed gene 261                                                        | 2.23E-04 | NM_009357                                                       |
| 452 | Pvr13                       | poliovirus receptor-related 3                                                    | 2.23E-04 | NM_021495 /// NM_021496 /// NM_021497                           |
| 453 | Gbas                        | glioblastoma amplified sequence                                                  | 2.25E-04 | NM_008095                                                       |
| 454 | Abcb1a                      | ATP-binding cassette, sub-family B (MDR/TAP), member 1A                          | 2.25E-04 | NM_011076                                                       |
| 455 | Nfyb                        | nuclear transcription factor-Y beta                                              | 2.25E-04 | NM_010914                                                       |
| 456 | Zfand6                      | zinc finger, AN1-type domain 6                                                   | 2.28E-04 | NM_022985                                                       |
| 457 | A130022J15Rik               | RIKEN cDNA A130022J15 gene                                                       | 2.31E-04 | NM_175313                                                       |



|     |                         |                                                                                  |          |                                                                 |
|-----|-------------------------|----------------------------------------------------------------------------------|----------|-----------------------------------------------------------------|
| 458 | Btbd2                   | BTB (POZ) domain containing 2                                                    | 2.31E-04 | NM_145361 /// XM_001000710 /// XM_910826                        |
| 459 | Cbx1                    | chromobox homolog 1 (Drosophila HP1 beta)                                        | 2.36E-04 | NM_007622                                                       |
| 460 | Snrnp48                 | small nuclear ribonucleoprotein 48 (U11/U12)                                     | 2.39E-04 | NM_026382                                                       |
| 461 | Nrarp                   | Notch-regulated ankyrin repeat protein                                           | 2.41E-04 | NM_025980                                                       |
| 462 | Polr3g                  | polymerase (RNA) III (DNA directed) polypeptide G                                | 2.43E-04 | NM_001081176                                                    |
| 463 | Bbc3                    | BCL2 binding component 3                                                         | 2.44E-04 | NM_133234                                                       |
| 464 | Tmem38b                 | transmembrane protein 38B                                                        | 2.46E-04 | NM_028053                                                       |
| 465 | Kif5b                   | kinesin family member 5B                                                         | 2.49E-04 | NM_008448                                                       |
| 466 | Irak1                   | interleukin-1 receptor-associated kinase 1                                       | 2.49E-04 | NM_008363                                                       |
| 467 | Bptf                    | bromodomain PHD finger transcription factor                                      | 2.50E-04 | NM_176850                                                       |
| 468 | Cyp27a1                 | cytochrome P450, family 27, subfamily a, polypeptide 1                           | 2.51E-04 | NM_024264                                                       |
| 469 | Wac                     | WW domain containing adaptor with coiled-coil                                    | 2.52E-04 | NM_001146298 /// NM_153085 /// NR_027465                        |
| 470 | Ndn                     | necdin                                                                           | 2.52E-04 | NM_010882                                                       |
| 471 | Bscl2                   | Bernardinelli-Seip congenital lipodystrophy 2 homolog (human)                    | 2.54E-04 | NM_001136064 /// NM_008144                                      |
| 472 | Ndn                     | necdin                                                                           | 2.54E-04 | NM_010882                                                       |
| 473 | Tada3l                  | transcriptional adaptor 3 (NGG1 homolog, yeast)-like                             | 2.58E-04 | NM_133932                                                       |
| 474 | Spp1                    | secreted phosphoprotein 1                                                        | 2.60E-04 | NM_009263                                                       |
| 475 | Ash1l                   | ash1 (absent, small, or homeotic)-like (Drosophila)                              | 2.60E-04 | NM_138679                                                       |
| 476 | Cd36                    | CD36 antigen                                                                     | 2.60E-04 | NM_001159555 /// NM_001159556 /// NM_001159557 /// NM_001159558 |
| 477 | Vrk1                    | vaccinia related kinase 1                                                        | 2.61E-04 | NM_001029843 /// NM_001029844 /// NM_011705                     |
| 478 | Stk4                    | serine/threonine kinase 4                                                        | 2.66E-04 | NM_021420                                                       |
| 479 | Chd4                    | chromodomain helicase DNA binding protein 4                                      | 2.66E-04 | NM_145979                                                       |
| 480 | Psd3                    | pleckstrin and Sec7 domain containing 3                                          | 2.67E-04 | NM_027626 /// NM_030263 /// NM_177698                           |
| 481 | Fam63a                  | family with sequence similarity 63, member A                                     | 2.68E-04 | NM_133858                                                       |
| 482 | Pde7a                   | phosphodiesterase 7A                                                             | 2.70E-04 | NM_001122759 /// NM_008802                                      |
| 483 | 2610507B11Rik           | RIKEN cDNA 2610507B11 gene                                                       | 2.70E-04 | NM_001002004                                                    |
| 484 | Nr2f2                   | nuclear receptor subfamily 2, group F, member 2                                  | 2.73E-04 | NM_009697 /// NM_183261                                         |
| 485 | Ift80                   | intraflagellar transport 80 homolog (Chlamydomonas)                              | 2.74E-04 | NM_026641                                                       |
| 486 | Tnrc6a                  | trinucleotide repeat containing 6a                                               | 2.74E-04 | NM_144925                                                       |
| 487 | AI314976                | expressed sequence AI314976                                                      | 2.77E-04 | NM_207219                                                       |
| 488 | Gdap10                  | ganglioside-induced differentiation-associated-protein 10                        | 2.77E-04 | XM_895068                                                       |
| 489 | Taok1                   | TAO kinase 1                                                                     | 2.78E-04 | NM_144825                                                       |
| 490 | Elmod3 /// LOC100047355 | ELMO/CED-12 domain containing 3 /// similar to RNA binding motif and ELMO domain | 2.80E-04 | NM_144917 /// XM_001477967                                      |
| 491 | Rab3d                   | RAB3D, member RAS oncogene family                                                | 2.86E-04 | NM_031874                                                       |
| 492 | 2310001A20Rik           | RIKEN cDNA 2310001A20 gene                                                       | 2.87E-04 | NM_027977                                                       |
| 493 | Nsun4                   | NOL1/NOP2/Sun domain family, member 4                                            | 2.88E-04 | NM_028142                                                       |
| 494 | Fbn1                    | fibrillin 1                                                                      | 2.88E-04 | NM_007993                                                       |
| 495 | Gab1                    | growth factor receptor bound protein 2-associated protein 1                      | 2.88E-04 | NM_021356                                                       |
| 496 | Sulf2                   | sulfatase 2                                                                      | 2.90E-04 | NM_028072                                                       |
| 497 | Atp7a                   | ATPase, Cu++ transporting, alpha polypeptide                                     | 2.91E-04 | NM_001109757 /// NM_009726                                      |
| 498 | Stl7l                   | suppression of tumorigenicity 7-like                                             | 2.91E-04 | NM_153091                                                       |
| 499 | Prkd3                   | protein kinase D3                                                                | 2.92E-04 | NM_029239                                                       |
| 500 | Dgcr6                   | DIGeorge syndrome critical region gene 6                                         | 2.92E-04 | NM_010047                                                       |
| 501 | Uxs1                    | UDP-glucuronate decarboxylase 1                                                  | 2.93E-04 | NM_026430                                                       |
| 502 | a                       | nonagouti                                                                        | 2.95E-04 | NM_015770                                                       |
| 503 | Dnpep                   | aspartyl aminopeptidase                                                          | 2.96E-04 | NM_001110831 /// NM_016878                                      |

|     |                            |                                                                                  |          |                                                                 |
|-----|----------------------------|----------------------------------------------------------------------------------|----------|-----------------------------------------------------------------|
| 504 | ---                        | ---                                                                              | 2.96E-04 | ---                                                             |
| 505 | Gstt1                      | glutathione S-transferase, theta 1                                               | 2.98E-04 | NM_008185                                                       |
| 506 | Zfp426                     | zinc finger protein 426                                                          | 2.98E-04 | NM_001110309 /// NM_146221                                      |
| 507 | Tmem189                    | transmembrane protein 189                                                        | 3.01E-04 | NM_145538                                                       |
| 508 | Use1                       | unconventional SNARE in the ER 1 homolog (S. cerevisiae)                         | 3.02E-04 | NM_001145780 /// NM_025917 /// NM_029768                        |
| 509 | Gpr137b /// Gpr137b-ps /// | G protein-coupled receptor 137B /// G protein-coupled receptor 137B, pseudogene  | 3.02E-04 | NM_031999 /// NR_003568 /// XM_001473441 /// XR_001658          |
| 510 | Sos2                       | son of sevenless homolog 2 (Drosophila)                                          | 3.04E-04 | NM_001135559 /// XM_127051 /// XM_916574                        |
| 511 | B230308N11Rik              | RIKEN cDNA B230308N11 gene                                                       | 3.05E-04 | ---                                                             |
| 512 | Purb                       | purine rich element binding protein B                                            | 3.08E-04 | NM_011221                                                       |
| 513 | Zfand2b                    | zinc finger, AN1 type domain 2B                                                  | 3.08E-04 | NM_001159905 /// NM_001159906 /// NM_026846                     |
| 514 | Trim23                     | tripartite motif-containing 23                                                   | 3.09E-04 | NM_030731                                                       |
| 515 | Kcnn4                      | potassium intermediate/small conductance calcium-activated channel, subfamily N, | 3.09E-04 | NM_001163510 /// NM_008433                                      |
| 516 | ---                        | ---                                                                              | 3.10E-04 | ---                                                             |
| 517 | Trim47                     | tripartite motif-containing 47                                                   | 3.10E-04 | NM_172570                                                       |
| 518 | Baz2a                      | bromodomain adjacent to zinc finger domain, 2A                                   | 3.11E-04 | NM_054078                                                       |
| 519 | Fam111a                    | family with sequence similarity 111, member A                                    | 3.16E-04 | NM_026640                                                       |
| 520 | Pcmt2                      | protein-L-isoaspartate (D-aspartate) O-methyltransferase domain containing 2     | 3.17E-04 | NM_153594                                                       |
| 521 | Mea1                       | male enhanced antigen 1                                                          | 3.17E-04 | NM_010787                                                       |
| 522 | Jak3                       | Janus kinase 3                                                                   | 3.17E-04 | NM_010589                                                       |
| 523 | Golm4                      | golgi integral membrane protein 4                                                | 3.20E-04 | NM_175193                                                       |
| 524 | Elf4g1                     | eukaryotic translation initiation factor 4, gamma 1                              | 3.23E-04 | NM_001005331 /// NM_145941                                      |
| 525 | Tpr                        | translocated promoter region                                                     | 3.23E-04 | NM_133780                                                       |
| 526 | Rnasel                     | ribonuclease L (2', 5'-oligoadenylate synthetase-dependent)                      | 3.24E-04 | NM_011882                                                       |
| 527 | Rapgef3                    | Rap guanine nucleotide exchange factor (GEF) 3                                   | 3.27E-04 | NM_144850                                                       |
| 528 | 28104740I9Rik              | RIKEN cDNA 28104740I9 gene                                                       | 3.28E-04 | NM_026054                                                       |
| 529 | Rbm5                       | RNA binding motif protein 5                                                      | 3.28E-04 | NM_148930                                                       |
| 530 | Trim44                     | tripartite motif-containing 44                                                   | 3.30E-04 | NM_020267                                                       |
| 531 | Cpeb3                      | cytoplasmic polyadenylation element binding protein 3                            | 3.30E-04 | NM_198300                                                       |
| 532 | Nln                        | neurolysin (metallopeptidase M3 family)                                          | 3.31E-04 | NM_029447                                                       |
| 533 | Elt1                       | EGF, latrophilin seven transmembrane domain containing 1                         | 3.34E-04 | NM_133222                                                       |
| 534 | Abtb1                      | ankyrin repeat and BTB (POZ) domain containing 1                                 | 3.36E-04 | NM_030251                                                       |
| 535 | Plagl2                     | pleiomorphic adenoma gene-like 2                                                 | 3.36E-04 | NM_018807                                                       |
| 536 | Nrtn                       | neurturin                                                                        | 3.37E-04 | NM_008738                                                       |
| 537 | Rundc3a                    | RUN domain containing 3A                                                         | 3.37E-04 | NM_016759                                                       |
| 538 | Cdk2ap2                    | CDK2-associated protein 2                                                        | 3.38E-04 | NM_026373                                                       |
| 539 | Erf                        | Ets2 repressor factor                                                            | 3.38E-04 | NM_010155                                                       |
| 540 | Cramp1l                    | Crm, cramped-like (Drosophila)                                                   | 3.39E-04 | NM_020608 /// XM_001005194 /// XM_484614 /// XM_904007 /// XM_9 |
| 541 | Hnmt                       | histamine N-methyltransferase                                                    | 3.40E-04 | NM_080462                                                       |
| 542 | Magohb                     | mago-nashi homolog B (Drosophila)                                                | 3.40E-04 | NM_025564                                                       |
| 543 | Npl                        | N-acetylneuraminate pyruvate lyase                                               | 3.42E-04 | NM_028749                                                       |
| 544 | Tmem38b                    | transmembrane protein 38B                                                        | 3.43E-04 | NM_028053                                                       |
| 545 | Ifngr2                     | interferon gamma receptor 2                                                      | 3.43E-04 | NM_008338                                                       |
| 546 | Phax                       | phosphorylated adaptor for RNA export                                            | 3.44E-04 | NM_001162989 /// NM_019996                                      |
| 547 | Prpf40a                    | PRP40 pre-mRNA processing factor 40 homolog A (yeast)                            | 3.45E-04 | NM_018785                                                       |
| 548 | Cpeb3                      | cytoplasmic polyadenylation element binding protein 3                            | 3.45E-04 | NM_198300                                                       |
| 549 | Qser1                      | glutamine and serine rich 1                                                      | 3.45E-04 | NM_001123327 /// XM_001479246 /// XM_001479250 /// XM_916928    |

|     |                       |                                                                                  |          |                                             |
|-----|-----------------------|----------------------------------------------------------------------------------|----------|---------------------------------------------|
| 550 | Phip                  | pleckstrin homology domain interacting protein                                   | 3.45E-04 | NM_001081216                                |
| 551 | Rnasel                | ribonuclease L (2', 5'-oligoadenylate synthetase-dependent)                      | 3.46E-04 | NM_011882                                   |
| 552 | Cnot6l                | CCR4-NOT transcription complex, subunit 6-like                                   | 3.46E-04 | NM_144910 /// NM_178854                     |
| 553 | B3galt6               | UDP-Gal:betaGal beta 1,3-galactosyltransferase, polypeptide 6                    | 3.47E-04 | NM_080445                                   |
| 554 | Pam                   | peptidylglycine alpha-amidating monooxygenase                                    | 3.49E-04 | NM_013626                                   |
| 555 | Copg2as2              | coatomer protein complex, subunit gamma 2, antisense 2                           | 3.51E-04 | NR_002845 /// XM_001471930                  |
| 556 | ---                   | ---                                                                              | 3.52E-04 | ---                                         |
| 557 | Tjp2                  | tight junction protein 2                                                         | 3.53E-04 | NM_011597                                   |
| 558 | Nfib                  | nuclear factor I/B                                                               | 3.55E-04 | NM_001113209 /// NM_001113210 /// NM_008687 |
| 559 | Cbx1                  | chromobox homolog 1 (Drosophila HP1 beta)                                        | 3.56E-04 | NM_007622                                   |
| 560 | Plaur                 | plasminogen activator, urokinase receptor                                        | 3.58E-04 | NM_011113                                   |
| 561 | Amz2                  | archaealysin family metallopeptidase 2                                           | 3.60E-04 | NM_025275                                   |
| 562 | Nr3c1                 | nuclear receptor subfamily 3, group C, member 1                                  | 3.60E-04 | NM_008173                                   |
| 563 | Klra5                 | killer cell lectin-like receptor, subfamily A, member 5                          | 3.64E-04 | NM_008463                                   |
| 564 | Ankrd49               | ankyrin repeat domain 49                                                         | 3.65E-04 | NM_019683                                   |
| 565 | Pdpx                  | pyridoxal (pyridoxine, vitamin B6) phosphatase                                   | 3.66E-04 | NM_020271                                   |
| 566 | 2610028A01Rik         | RIKEN cDNA 2610028A01 gene                                                       | 3.67E-04 | NM_028228                                   |
| 567 | Csnk2a2               | casein kinase 2, alpha prime polypeptide                                         | 3.68E-04 | NM_009974                                   |
| 568 | Pip5k1b               | phosphatidylinositol-4-phosphate 5-kinase, type 1 beta                           | 3.69E-04 | NM_008846                                   |
| 569 | Jam2                  | junction adhesion molecule 2                                                     | 3.70E-04 | NM_023844                                   |
| 570 | Zfand2b               | zinc finger, AN1 type domain 2B                                                  | 3.70E-04 | NM_001159905 /// NM_001159906 /// NM_026846 |
| 571 | Lama4                 | laminin, alpha 4                                                                 | 3.72E-04 | NM_010681                                   |
| 572 | Itga6                 | integrin alpha 6                                                                 | 3.73E-04 | NM_008397                                   |
| 573 | Tnrc6a                | trinucleotide repeat containing 6a                                               | 3.76E-04 | NM_144925                                   |
| 574 | Stx17                 | syntaxin 17                                                                      | 3.76E-04 | NM_026343                                   |
| 575 | Nfkbib                | nuclear factor of kappa light polypeptide gene enhancer in B-cells inhibitor, be | 3.79E-04 | NM_010908                                   |
| 576 | P4ha2                 | procollagen-proline, 2-oxoglutarate 4-dioxygenase (proline 4-hydroxylase), alpha | 3.83E-04 | NM_001136076 /// NM_011031                  |
| 577 | Cbr4 /// LOC100046395 | carbonyl reductase 4 /// similar to carbonic reductase 4                         | 3.83E-04 | NM_145595 /// XR_032392                     |
| 578 | Insl3 /// Jak3        | insulin-like 3 /// Janus kinase 3                                                | 3.84E-04 | NM_010589 /// NM_013564                     |
| 579 | Pdrg1                 | p53 and DNA damage regulated 1                                                   | 3.85E-04 | NM_178939                                   |
| 580 | Dom3z                 | DOM-3 homolog Z (C. elegans)                                                     | 3.86E-04 | NM_001163770 /// NM_033613                  |
| 581 | Usp34                 | ubiquitin specific peptidase 34                                                  | 3.89E-04 | XM_483996                                   |
| 582 | Chmp4b /// LOC674706  | chromatin modifying protein 4B /// similar to zinc finger protein 341            | 3.89E-04 | NM_029362 /// XM_976559                     |
| 583 | 2610002J02Rik         | RIKEN cDNA 2610002J02 gene                                                       | 3.92E-04 | NM_001033134                                |
| 584 | Sbno1                 | sno, strawberry notch homolog 1 (Drosophila)                                     | 3.94E-04 | NM_001081203                                |
| 585 | Rnf25                 | ring finger protein 25                                                           | 3.94E-04 | NM_021313                                   |
| 586 | LOC100045546          | similar to Id4                                                                   | 4.00E-04 | XM_001474498                                |
| 587 | Cacnb3                | calcium channel, voltage-dependent, beta 3 subunit                               | 4.01E-04 | NM_001044741 /// NM_007581                  |
| 588 | Wdr45                 | WD repeat domain 45                                                              | 4.07E-04 | NM_172372                                   |
| 589 | Wwc2                  | WW, C2 and coiled-coil domain containing 2                                       | 4.08E-04 | NM_133791                                   |
| 590 | Grb10                 | growth factor receptor bound protein 10                                          | 4.08E-04 | NM_010345                                   |
| 591 | Rab22a                | RAB22A, member RAS oncogene family                                               | 4.10E-04 | NM_024436                                   |
| 592 | AA409749              | expressed sequence AA409749                                                      | 4.10E-04 | ---                                         |
| 593 | Ppp1r1a               | protein phosphatase 1, regulatory (inhibitor) subunit 1A                         | 4.13E-04 | NM_021391                                   |
| 594 | Mettl8                | methyltransferase like 8                                                         | 4.14E-04 | NM_001110512 /// NM_145524                  |
| 595 | Acp2                  | acid phosphatase 2, lysosomal                                                    | 4.14E-04 | NM_007387                                   |

|     |                             |                                                                              |          |                                                                 |
|-----|-----------------------------|------------------------------------------------------------------------------|----------|-----------------------------------------------------------------|
| 596 | Reep3                       | receptor accessory protein 3                                                 | 4.17E-04 | NM_178606                                                       |
| 597 | Msl2                        | male-specific lethal 2 homolog (Drosophila)                                  | 4.18E-04 | NM_001100451 /// XM_150227 /// XM_907909                        |
| 598 | Adh1                        | alcohol dehydrogenase 1 (class I)                                            | 4.18E-04 | NM_007409                                                       |
| 599 | Uhrf1bp1l                   | UHRF1 (ICBP90) binding protein 1-like                                        | 4.22E-04 | NM_029166                                                       |
| 600 | Ets1                        | E26 avian leukemia oncogene 1, 5' domain                                     | 4.24E-04 | NM_001038642 /// NM_011808                                      |
| 601 | Pnrc2                       | proline-rich nuclear receptor coactivator 2                                  | 4.26E-04 | NM_026383                                                       |
| 602 | Pla1a                       | phospholipase A1 member A                                                    | 4.30E-04 | NM_134102                                                       |
| 603 | Malat1                      | metastasis associated lung adenocarcinoma transcript 1 (non-coding RNA)      | 4.34E-04 | NR_002847                                                       |
| 604 | Prdm4                       | PR domain containing 4                                                       | 4.39E-04 | NM_181650                                                       |
| 605 | Vps41                       | vacuolar protein sorting 41 (yeast)                                          | 4.39E-04 | NM_172120                                                       |
| 606 | Ndn                         | necdin                                                                       | 4.42E-04 | NM_010882                                                       |
| 607 | Slc6a8                      | solute carrier family 6 (neurotransmitter transporter, creatine), member 8   | 4.47E-04 | NM_001142809 /// NM_001142810 /// NM_133987                     |
| 608 | ---                         | ---                                                                          | 4.47E-04 | ---                                                             |
| 609 | Bxdc1                       | brix domain containing 1                                                     | 4.51E-04 | NM_001042556 /// NM_023323                                      |
| 610 | Gpx8                        | glutathione peroxidase 8 (putative)                                          | 4.52E-04 | NM_027127                                                       |
| 611 | Parp10                      | poly (ADP-ribose) polymerase family, member 10                               | 4.54E-04 | NM_001163575 /// NM_001163576 /// XM_001476518 /// XM_00147653  |
| 612 | Lsr                         | lipolysis stimulated lipoprotein receptor                                    | 4.56E-04 | NM_001164184 /// NM_001164185 /// NM_017405                     |
| 613 | Pds5a                       | PDS5, regulator of cohesion maintenance, homolog A (S. cerevisiae)           | 4.58E-04 | NM_001081321                                                    |
| 614 | Gas5                        | growth arrest specific 5                                                     | 4.58E-04 | NR_002840                                                       |
| 615 | Grem2                       | gremlin 2 homolog, cysteine knot superfamily (Xenopus laevis)                | 4.59E-04 | NM_011825                                                       |
| 616 | Lmf1                        | lipase maturation factor 1                                                   | 4.60E-04 | NM_029624                                                       |
| 617 | Cln8                        | ceroid-lipofuscinosis, neuronal 8                                            | 4.61E-04 | NM_012000                                                       |
| 618 | AU040320                    | expressed sequence AU040320                                                  | 4.65E-04 | NM_001035525 /// NM_001035526 /// NM_133886                     |
| 619 | Slc43a3                     | solute carrier family 43, member 3                                           | 4.67E-04 | NM_021398                                                       |
| 620 | Aldh7a1                     | aldehyde dehydrogenase family 7, member A1                                   | 4.67E-04 | NM_001127338 /// NM_138600                                      |
| 621 | Zeb2                        | zinc finger E-box binding homeobox 2                                         | 4.68E-04 | NM_015753                                                       |
| 622 | Mpp7                        | membrane protein, palmitoylated 7 (MAGUK p55 subfamily member 7)             | 4.72E-04 | NM_001081287 /// NM_001161620                                   |
| 623 | Pkn1 /// Ptger1             | protein kinase N1 /// prostaglandin E receptor 1 (subtype EP1)               | 4.73E-04 | NM_013641 /// NM_177262                                         |
| 624 | Smc3                        | structural maintenance of chromosomes 3                                      | 4.76E-04 | NM_007790                                                       |
| 625 | Matk                        | megakaryocyte-associated tyrosine kinase                                     | 4.80E-04 | NM_010768                                                       |
| 626 | Ccnb1 /// Gm5593 /// Gm8416 | cyclin B1 /// predicted gene 5593 /// predicted gene 8416                    | 4.81E-04 | NM_172301 /// XM_001005050 /// XM_485921 /// XM_900988 /// XR_0 |
| 627 | Man1a2                      | mannosidase, alpha, class 1A, member 2                                       | 4.83E-04 | NM_010763                                                       |
| 628 | Comm9                       | COMM domain containing 9                                                     | 4.87E-04 | NM_029635                                                       |
| 629 | Bmpr2                       | bone morphogenic protein receptor, type II (serine/threonine kinase)         | 4.89E-04 | NM_007561                                                       |
| 630 | Nop56                       | NOP56 ribonucleoprotein homolog (yeast)                                      | 4.91E-04 | NM_024193                                                       |
| 631 | Aspscr1                     | alveolar soft part sarcoma chromosome region, candidate 1 (human)            | 4.93E-04 | NM_001164224 /// NM_026877 /// NM_198223                        |
| 632 | Rnf160                      | ring finger protein 160                                                      | 4.94E-04 | NM_001081068                                                    |
| 633 | Cpa3                        | carboxypeptidase A3, mast cell                                               | 4.94E-04 | NM_007753                                                       |
| 634 | 1700124K17Rik /// Arid2     | RIKEN cDNA 1700124K17 gene /// AT rich interactive domain 2 (ARID, RFX-like) | 4.97E-04 | NM_175251                                                       |
| 635 | BC037034                    | cDNA sequence BC037034                                                       | 5.00E-04 | NM_001115015 /// NM_153161                                      |
| 636 | Plekhf1                     | pleckstrin homology domain containing, family F (with FYVE domain) member 1  | 5.00E-04 | NM_024413                                                       |
| 637 | Exoc1                       | exocyst complex component 1                                                  | 5.04E-04 | NM_027270                                                       |
| 638 | Tspan9                      | tetraspanin 9                                                                | 5.05E-04 | NM_175414                                                       |
| 639 | Taok1                       | TAO kinase 1                                                                 | 5.07E-04 | NM_144825                                                       |
| 640 | Sfrs2ip                     | splicing factor, arginine/serine-rich 2, interacting protein                 | 5.10E-04 | NM_028148                                                       |
| 641 | Stk11                       | serine/threonine kinase 11                                                   | 5.12E-04 | NM_011492                                                       |

|     |                        |                                                                                  |          |                                                                            |
|-----|------------------------|----------------------------------------------------------------------------------|----------|----------------------------------------------------------------------------|
| 642 | LOC100046232 /// Nfil3 | similar to NFIL3/E4BP4 transcription factor /// nuclear factor, interleukin 3, r | 5.12E-04 | NM_017373 /// XM_001475817                                                 |
| 643 | Pigs                   | phosphatidylinositol glycan anchor biosynthesis, class S                         | 5.13E-04 | NM_201406                                                                  |
| 644 | Brwd1                  | bromodomain and WD repeat domain containing 1                                    | 5.13E-04 | NM_001103179 /// NM_145125 /// NM_176928                                   |
| 645 | Asb5                   | ankyrin repeat and SOCs box-containing 5                                         | 5.14E-04 | NM_029569                                                                  |
| 646 | Senp2                  | SUMO/sentrin specific peptidase 2                                                | 5.17E-04 | NM_029457 /// NR_027488                                                    |
| 647 | Tardbp                 | TAR DNA binding protein                                                          | 5.19E-04 | NM_001003898 /// NM_001003899 /// NM_001008545 /// NM_001008546            |
| 648 | Igf2                   | insulin-like growth factor 2                                                     | 5.21E-04 | NM_001122736 /// NM_001122737 /// NM_010514                                |
| 649 | ---                    | ---                                                                              | 5.24E-04 | ---                                                                        |
| 650 | Mmp3                   | matrix metallopeptidase 3                                                        | 5.25E-04 | NM_010809                                                                  |
| 651 | Zscan21                | zinc finger and SCAN domain containing 21                                        | 5.27E-04 | NM_001044703 /// NM_001044704 /// NM_001044705 /// NM_011757               |
| 652 | Kif1b                  | kinesin family member 1B                                                         | 5.28E-04 | NM_008441 /// NM_207682                                                    |
| 653 | BC018101 /// Zfp97     | cDNA sequence BC018101 /// zinc finger protein 97                                | 5.28E-04 | NM_001005358 /// NM_001163919 /// NM_011765                                |
| 654 | Cnot8                  | CCR4-NOT transcription complex, subunit 8                                        | 5.30E-04 | NM_026949                                                                  |
| 655 | Utrn                   | utrophin                                                                         | 5.33E-04 | NM_011682                                                                  |
| 656 | Cadm1                  | cell adhesion molecule 1                                                         | 5.34E-04 | NM_001025600 /// NM_018770 /// NM_207675 /// NM_207676                     |
| 657 | Gucy1a3                | guanylate cyclase 1, soluble, alpha 3                                            | 5.35E-04 | NM_021896                                                                  |
| 658 | Hipk1                  | homeodomain interacting protein kinase 1                                         | 5.36E-04 | NM_010432                                                                  |
| 659 | Bmi1                   | Bmi1 polycomb ring finger oncogene                                               | 5.38E-04 | NM_007552                                                                  |
| 660 | Plxnc1                 | plexin C1                                                                        | 5.38E-04 | NM_018797                                                                  |
| 661 | O610037L13Rik          | RIKEN cDNA O610037L13 gene                                                       | 5.43E-04 | NM_028754                                                                  |
| 662 | Pnkd                   | paroxysmal nonkinesinogenic dyskinesia                                           | 5.43E-04 | NM_001039509 /// NM_019999 /// NM_025580                                   |
| 663 | Pdlim5                 | PDZ and LIM domain 5                                                             | 5.45E-04 | NM_019808 /// NM_019809 /// NM_022554                                      |
| 664 | ---                    | ---                                                                              | 5.49E-04 | ---                                                                        |
| 665 | Ncl                    | nucleolin                                                                        | 5.51E-04 | NM_010880                                                                  |
| 666 | Crk                    | v-crk sarcoma virus CT10 oncogene homolog (avian)                                | 5.52E-04 | NM_133656                                                                  |
| 667 | Fam86                  | family with sequence similarity 86                                               | 5.55E-04 | NM_027446                                                                  |
| 668 | Lpp                    | LIM domain containing preferred translocation partner in lipoma                  | 5.56E-04 | NM_001145952 /// NM_001145954 /// NM_178665                                |
| 669 | Lyst                   | lysosomal trafficking regulator                                                  | 5.62E-04 | NM_010748                                                                  |
| 670 | Enpep                  | glutamyl aminopeptidase                                                          | 5.64E-04 | NM_007934                                                                  |
| 671 | Dnmt3a                 | DNA methyltransferase 3A                                                         | 5.65E-04 | NM_007872 /// NM_153743                                                    |
| 672 | Srp54a /// Srp54b      | signal recognition particle 54a /// signal recognition particle 54b              | 5.66E-04 | NM_001100109 /// NM_011899 /// XM_001479059 /// XM_976391                  |
| 673 | Ube2d2                 | ubiquitin-conjugating enzyme E2D 2                                               | 5.66E-04 | NM_019912                                                                  |
| 674 | Asb6                   | ankyrin repeat and SOCS box-containing 6                                         | 5.70E-04 | NM_133346                                                                  |
| 675 | LOC674195 /// Usp48    | hypothetical protein LOC674195 /// ubiquitin specific peptidase 48               | 5.73E-04 | NM_130879 /// XM_001052064                                                 |
| 676 | Herc2                  | hect (homologous to the E6-AP (UBE3A) carboxyl terminus) domain and RCC1 (CHC1)  | 5.77E-04 | NM_010418                                                                  |
| 677 | Ergic3                 | ERGIC and golgi 3                                                                | 5.77E-04 | NM_025516                                                                  |
| 678 | Klhl7                  | kelch-like 7 (Drosophila)                                                        | 5.78E-04 | NM_001161800 /// NM_026448                                                 |
| 679 | Fance                  | Fanconi anemia, complementation group E                                          | 5.79E-04 | NM_001163819 /// NM_001163820 /// NR_028296 /// NR_028297 /// NM_001163821 |
| 680 | Tnk2                   | tyrosine kinase, non-receptor, 2                                                 | 5.82E-04 | NM_001110147 /// NM_016788                                                 |
| 681 | Znrf1                  | zinc and ring finger 1                                                           | 5.82E-04 | NM_133206                                                                  |
| 682 | Pttg1                  | pituitary tumor-transforming gene 1                                              | 5.84E-04 | NM_001131054 /// NM_013917                                                 |
| 683 | Lama4                  | laminin, alpha 4                                                                 | 5.88E-04 | NM_010681                                                                  |
| 684 | Rbm5                   | RNA binding motif protein 5                                                      | 5.89E-04 | NM_148930                                                                  |
| 685 | Csnk2a1 /// Gm10031    | casein kinase 2, alpha 1 polypeptide /// predicted gene 10031                    | 5.90E-04 | NM_007788 /// XM_001472047                                                 |
| 686 | Podxl                  | podocalyxin-like                                                                 | 5.93E-04 | NM_013723                                                                  |
| 687 | Pcmt1                  | protein-L-isospartate (D-aspartate) O-methyltransferase domain containing 1      | 5.93E-04 | NM_183028                                                                  |

|     |                         |                                                                                  |          |                                                                         |
|-----|-------------------------|----------------------------------------------------------------------------------|----------|-------------------------------------------------------------------------|
| 688 | Lgals3bp                | lectin, galactoside-binding, soluble, 3 binding protein                          | 5.98E-04 | NM_011150                                                               |
| 689 | Fads2                   | fatty acid desaturase 2                                                          | 5.98E-04 | NM_019699                                                               |
| 690 | Gtrgeo22                | gene trap ROSA b-geo 22                                                          | 6.01E-04 | NM_148934                                                               |
| 691 | Foxp1                   | forkhead box P1                                                                  | 6.04E-04 | NM_053202                                                               |
| 692 | Trmt1                   | TRM1 tRNA methyltransferase 1 homolog (S. cerevisiae)                            | 6.08E-04 | NM_001164559 /// NM_001164560 /// NM_198020                             |
| 693 | Bace1                   | beta-site APP cleaving enzyme 1                                                  | 6.11E-04 | NM_001145947 /// NM_011792                                              |
| 694 | Tjp2                    | tight junction protein 2                                                         | 6.12E-04 | NM_011597                                                               |
| 695 | Kpna1                   | karyopherin (Importin) alpha 1                                                   | 6.13E-04 | NM_008465                                                               |
| 696 | 2510006D16Rik           | RIKEN cDNA 2510006D16 gene                                                       | 6.18E-04 | NM_029748                                                               |
| 697 | Frmd8                   | FERM domain containing 8                                                         | 6.22E-04 | NM_026169                                                               |
| 698 | Tnxb                    | tenascin XB                                                                      | 6.23E-04 | NM_031176                                                               |
| 699 | Hnrnpu                  | heterogeneous nuclear ribonucleoprotein U                                        | 6.24E-04 | NM_016805                                                               |
| 700 | Gmppa                   | GDP-mannose pyrophosphorylase A                                                  | 6.24E-04 | NM_133708                                                               |
| 701 | Txn1                    | thioredoxin 1                                                                    | 6.28E-04 | NM_011660                                                               |
| 702 | Dpysl3                  | dihydropyrimidinase-like 3                                                       | 6.30E-04 | NM_001136086 /// NM_009468                                              |
| 703 | Igf1                    | insulin-like growth factor 1                                                     | 6.33E-04 | NM_001111274 /// NM_001111275 /// NM_001111276 /// NM_010512 /          |
| 704 | Ssbp3                   | single-stranded DNA binding protein 3                                            | 6.33E-04 | NM_023672 /// NM_198438                                                 |
| 705 | Son                     | Son DNA binding protein                                                          | 6.35E-04 | NM_019973 /// NM_178880                                                 |
| 706 | Fmo5                    | flavin containing monooxygenase 5                                                | 6.41E-04 | NM_001161763 /// NM_001161765 /// NM_010232                             |
| 707 | Hsbp1                   | heat shock factor binding protein 1                                              | 6.42E-04 | NM_024219                                                               |
| 708 | Aup1                    | ancient ubiquitous protein 1                                                     | 6.48E-04 | NM_007517                                                               |
| 709 | Snap23                  | synaptosomal-associated protein 23                                               | 6.51E-04 | NM_009222                                                               |
| 710 | Chd4                    | chromodomain helicase DNA binding protein 4                                      | 6.56E-04 | NM_145979                                                               |
| 711 | Fam63a                  | family with sequence similarity 63, member A                                     | 6.56E-04 | NM_133858                                                               |
| 712 | Neurog3                 | neurogenin 3                                                                     | 6.60E-04 | NM_009719                                                               |
| 713 | Xdh                     | xanthine dehydrogenase                                                           | 6.63E-04 | NM_011723                                                               |
| 714 | Pcbp4                   | poly(rC) binding protein 4                                                       | 6.64E-04 | NM_021567                                                               |
| 715 | Gsn                     | gelsolin                                                                         | 6.71E-04 | NM_146120                                                               |
| 716 | Zfp106                  | zinc finger protein 106                                                          | 6.71E-04 | NM_011743                                                               |
| 717 | Fam36a                  | family with sequence similarity 36, member A                                     | 6.71E-04 | NM_025511                                                               |
| 718 | Rlan                    | RNA imprinted and accumulated in nucleus                                         | 6.75E-04 | NR_028261 /// XM_901568 /// XM_922645                                   |
| 719 | Baz2b                   | bromodomain adjacent to zinc finger domain, 2B                                   | 6.76E-04 | NM_001001182                                                            |
| 720 | Cux2                    | cut-like homeobox 2                                                              | 6.77E-04 | NM_007804                                                               |
| 721 | Cluap1                  | clusterin associated protein 1                                                   | 6.78E-04 | NM_029738                                                               |
| 722 | D2Wsu81e                | DNA segment, Chr 2, Wayne State University 81, expressed                         | 6.85E-04 | NM_172660                                                               |
| 723 | Stxbp2                  | syntaxin binding protein 2                                                       | 6.86E-04 | NM_011503                                                               |
| 724 | Preli1                  | PRELI domain containing 1                                                        | 6.88E-04 | NM_025596                                                               |
| 725 | Ccdc92                  | coiled-coil domain containing 92                                                 | 6.89E-04 | NM_144819                                                               |
| 726 | Map3k7                  | mitogen-activated protein kinase kinase kinase 7                                 | 6.94E-04 | NM_009316 /// NM_172688                                                 |
| 727 | Rnf11                   | ring finger protein 11                                                           | 6.96E-04 | NM_013876                                                               |
| 728 | NIK                     | nemo like kinase                                                                 | 6.96E-04 | NM_008702                                                               |
| 729 | Rbm25                   | RNA binding motif protein 25                                                     | 6.97E-04 | NM_025930 /// NM_027349                                                 |
| 730 | Cd80                    | CD80 antigen                                                                     | 7.00E-04 | NM_009855                                                               |
| 731 | Tcf2a                   | transcription factor E2a                                                         | 7.02E-04 | NM_001164147 /// NM_001164148 /// NM_001164149 /// NM_001164150         |
| 732 | 0610010B08Rik /// Gm142 | RIKEN cDNA 0610010B08 gene /// predicted gene 14295 /// similar to zinc finger p | 7.04E-04 | XM_001472180 /// XM_001472314 /// XM_895085 /// XM_902617 /// XM_902618 |
| 733 | C630004H02Rik           | RIKEN cDNA C630004H02 gene                                                       | 7.07E-04 | NM_175454                                                               |

|     |                         |                                                                                  |          |                                                                 |
|-----|-------------------------|----------------------------------------------------------------------------------|----------|-----------------------------------------------------------------|
| 734 | Ctsw                    | cathepsin W                                                                      | 7.12E-04 | NM_009985                                                       |
| 735 | Tbl1xr1                 | transducin (beta)-like 1X-linked receptor 1                                      | 7.13E-04 | NM_030732                                                       |
| 736 | Anapc4                  | anaphase promoting complex subunit 4                                             | 7.15E-04 | NM_024213                                                       |
| 737 | Enpp4                   | ectonucleotide pyrophosphatase/phosphodiesterase 4                               | 7.18E-04 | NM_199016                                                       |
| 738 | Chst1                   | carbohydrate (keratan sulfate Gal-6) sulfotransferase 1                          | 7.20E-04 | NM_023850                                                       |
| 739 | Slc35c2                 | solute carrier family 35, member C2                                              | 7.27E-04 | NM_144893                                                       |
| 740 | Shmt1                   | serine hydroxymethyltransferase 1 (soluble)                                      | 7.36E-04 | NM_009171                                                       |
| 741 | Smarcc1                 | SWI/SNF related, matrix associated, actin dependent regulator of chromatin, subf | 7.36E-04 | NM_009211                                                       |
| 742 | 2310001A20Rik           | RIKEN cDNA 2310001A20 gene                                                       | 7.36E-04 | NM_027977                                                       |
| 743 | Gzma                    | granzyme A                                                                       | 7.37E-04 | NM_010370                                                       |
| 744 | Lima1                   | LIM domain and actin binding 1                                                   | 7.38E-04 | NM_001113545 /// NM_023063                                      |
| 745 | Asna1                   | arsA arsenite transporter, ATP-binding, homolog 1 (bacterial)                    | 7.44E-04 | NM_019652                                                       |
| 746 | Cav2                    | caveolin 2                                                                       | 7.46E-04 | NM_016900                                                       |
| 747 | Lamb1-1                 | laminin B1 subunit 1                                                             | 7.49E-04 | NM_008482                                                       |
| 748 | Nasp                    | nuclear autoantigenic sperm protein (histone-binding)                            | 7.49E-04 | NM_001081475 /// NM_016777                                      |
| 749 | Igh                     | Immunoglobulin heavy chain complex                                               | 7.51E-04 | ---                                                             |
| 750 | Mut                     | methylmalonyl-Coenzyme A mutase                                                  | 7.53E-04 | NM_008650                                                       |
| 751 | Suv420h1                | suppressor of variegation 4-20 homolog 1 (Drosophila)                            | 7.63E-04 | NM_144871                                                       |
| 752 | Endod1                  | endonuclease domain containing 1                                                 | 7.63E-04 | NM_028013                                                       |
| 753 | Fxc1                    | fractured callus expressed transcript 1                                          | 7.65E-04 | NM_019502                                                       |
| 754 | F8a                     | factor 8-associated gene A                                                       | 7.66E-04 | NM_007978                                                       |
| 755 | Siah2                   | seven in absentia 2                                                              | 7.66E-04 | NM_009174                                                       |
| 756 | Gm5529 /// Gm5560 /// G | predicted gene 5529 /// predicted gene 5560 /// predicted gene 6425 /// predicte | 7.72E-04 | NM_001081233 /// NM_007451 /// XM_484885 /// XM_887851 /// XM_9 |
| 757 | Mus81                   | MUS81 endonuclease homolog (yeast)                                               | 7.72E-04 | NM_027877                                                       |
| 758 | Rgs5                    | regulator of G-protein signaling 5                                               | 7.73E-04 | NM_009063                                                       |
| 759 | 2900073G15Rik           | RIKEN cDNA 2900073G15 gene                                                       | 7.74E-04 | NM_026064                                                       |
| 760 | Lamb1-1                 | laminin B1 subunit 1                                                             | 7.76E-04 | NM_008482                                                       |
| 761 | Ddhd2                   | DDHD domain containing 2                                                         | 7.77E-04 | NM_028102 /// XM_356065 /// XM_911470 /// XM_983745             |
| 762 | Klf7                    | Kruppel-like factor 7 (ubiquitous)                                               | 7.78E-04 | NM_033563                                                       |
| 763 | Itpr3                   | inositol 1,4,5-triphosphate receptor 3                                           | 7.80E-04 | NM_080553                                                       |
| 764 | Srrm1                   | serine/arginine repetitive matrix 1                                              | 7.81E-04 | NM_001130477 /// NM_016799                                      |
| 765 | Nfatc3                  | nuclear factor of activated T-cells, cytoplasmic, calcineurin-dependent 3        | 7.81E-04 | NM_010901                                                       |
| 766 | Pnpla7                  | patatin-like phospholipase domain containing 7                                   | 7.82E-04 | NM_146251                                                       |
| 767 | Elp2                    | elongation protein 2 homolog (S. cerevisiae)                                     | 7.85E-04 | NM_021448                                                       |
| 768 | Cdh2                    | cadherin 2                                                                       | 7.86E-04 | NM_007664                                                       |
| 769 | Ciz1                    | CDKN1A interacting zinc finger protein 1                                         | 7.86E-04 | NM_028412                                                       |
| 770 | Ncstn                   | nicastrin                                                                        | 7.90E-04 | NM_021607                                                       |
| 771 | Nudt7                   | nudix (nucleoside diphosphate linked moiety X)-type motif 7                      | 7.93E-04 | NM_024437 /// NM_024446                                         |
| 772 | Nlgn2                   | neuroligin 2                                                                     | 7.93E-04 | NM_198862                                                       |
| 773 | Hrk                     | harakiri, BCL2 interacting protein (contains only BH3 domain)                    | 7.96E-04 | NM_007545                                                       |
| 774 | Mbtps1                  | membrane-bound transcription factor peptidase, site 1                            | 7.97E-04 | NM_019709                                                       |
| 775 | Gna11                   | guanine nucleotide binding protein, alpha 11                                     | 7.98E-04 | NM_010301                                                       |
| 776 | ---                     | ---                                                                              | 8.01E-04 | ---                                                             |
| 777 | Pdcl                    | phosducin-like                                                                   | 8.03E-04 | NM_026176                                                       |
| 778 | Gm2648 /// Gm5481 /// G | ribosomal protein L30 pseudogene /// predicted gene 5481 /// predicted gene 6109 | 8.05E-04 | NM_001163485 /// NM_009083 /// XM_001474827 /// XM_001475086 // |
| 779 | ---                     | ---                                                                              | 8.07E-04 | ---                                                             |

|     |                           |                                                                                  |          |                                                                 |
|-----|---------------------------|----------------------------------------------------------------------------------|----------|-----------------------------------------------------------------|
| 780 | Rgs5                      | regulator of G-protein signaling 5                                               | 8.07E-04 | NM_009063                                                       |
| 781 | Atf6b                     | activating transcription factor 6 beta                                           | 8.08E-04 | NM_017406                                                       |
| 782 | Rab7                      | RAB7, member RAS oncogene family                                                 | 8.16E-04 | NM_009005                                                       |
| 783 | Inpp5k                    | inositol polyphosphate 5-phosphatase K                                           | 8.21E-04 | NM_008916                                                       |
| 784 | Elf5b                     | eukaryotic translation initiation factor 5B                                      | 8.21E-04 | NM_198303                                                       |
| 785 | Ift172                    | intraflagellar transport 172 homolog (Chlamydomonas)                             | 8.21E-04 | NM_026298                                                       |
| 786 | Foxp1                     | Forkhead box P1                                                                  | 8.26E-04 | NM_053202                                                       |
| 787 | Kank2                     | KN motif and ankyrin repeat domains 2                                            | 8.29E-04 | NM_145611                                                       |
| 788 | Zmynd11                   | zinc finger, MYND domain containing 11                                           | 8.30E-04 | NM_144516                                                       |
| 789 | Tjp2                      | tight junction protein 2                                                         | 8.35E-04 | NM_011597                                                       |
| 790 | Plt1pnb                   | phosphatidylinositol transfer protein, beta                                      | 8.43E-04 | NM_019640                                                       |
| 791 | Gck                       | glucokinase                                                                      | 8.45E-04 | NM_010292                                                       |
| 792 | Pdcd6ip                   | Programmed cell death 6 interacting protein                                      | 8.46E-04 | NM_011052                                                       |
| 793 | Clcn7                     | chloride channel 7                                                               | 8.47E-04 | NM_011930                                                       |
| 794 | Tm7sf3                    | transmembrane 7 superfamily member 3                                             | 8.52E-04 | NM_026281 /// XM_001475674                                      |
| 795 | Rest                      | RE1-silencing transcription factor                                               | 8.55E-04 | NM_011263                                                       |
| 796 | Csnk1d                    | casein kinase 1, delta                                                           | 8.56E-04 | NM_027874 /// NM_139059                                         |
| 797 | Mrps23                    | mitochondrial ribosomal protein S23                                              | 8.58E-04 | NM_024174                                                       |
| 798 | 2010107G23Rik             | RIKEN cDNA 2010107G23 gene                                                       | 8.64E-04 | NM_027251                                                       |
| 799 | Gas5                      | growth arrest specific 5                                                         | 8.64E-04 | NR_002840                                                       |
| 800 | Lyrm2                     | LYR motif containing 2                                                           | 8.64E-04 | NM_175364                                                       |
| 801 | Wars                      | tryptophanyl-tRNA synthetase                                                     | 8.65E-04 | NM_001164314 /// NM_001164488 /// NM_011710                     |
| 802 | Zfyve21                   | zinc finger, FYVE domain containing 21                                           | 8.69E-04 | NM_026752                                                       |
| 803 | Hmgb2                     | high mobility group box 2                                                        | 8.71E-04 | NM_008252                                                       |
| 804 | Kpna1                     | karyopherin (importin) alpha 1                                                   | 8.75E-04 | NM_008465                                                       |
| 805 | Cyfp2                     | cytoplasmic FMR1 interacting protein 2                                           | 8.77E-04 | NM_133769                                                       |
| 806 | Rbbp8                     | retinoblastoma binding protein 8                                                 | 8.80E-04 | NM_001081223                                                    |
| 807 | Spats2                    | spermatogenesis associated, serine-rich 2                                        | 8.82E-04 | NM_139140                                                       |
| 808 | Tomm7                     | translocase of outer mitochondrial membrane 7 homolog (yeast)                    | 8.82E-04 | NM_025394                                                       |
| 809 | Stard8                    | START domain containing 8                                                        | 8.88E-04 | NM_199018                                                       |
| 810 | Fam101b                   | family with sequence similarity 101, member B                                    | 8.89E-04 | XM_893392 /// XM_983541                                         |
| 811 | Fus                       | fusion, derived from t(12;16) malignant liposarcoma (human)                      | 8.89E-04 | NM_139149                                                       |
| 812 | Tnrc6a                    | trinucleotide repeat containing 6a                                               | 8.90E-04 | NM_144925                                                       |
| 813 | Ogt                       | O-linked N-acetylglucosamine (GlcNAc) transferase (UDP-N-acetylglucosamine:poly  | 8.90E-04 | NM_139144                                                       |
| 814 | 1100001G20Rik             | RIKEN cDNA 1100001G20 gene                                                       | 8.91E-04 | NM_183249                                                       |
| 815 | Zfp275                    | zinc finger protein 275                                                          | 8.92E-04 | NM_001160229 /// NM_031494                                      |
| 816 | Ing3                      | inhibitor of growth family, member 3                                             | 8.95E-04 | NM_023626                                                       |
| 817 | Rnf185                    | ring finger protein 185                                                          | 8.98E-04 | NM_145355                                                       |
| 818 | Sel1l                     | sel-1 suppressor of lin-12-like (C. elegans)                                     | 8.99E-04 | NM_001039089 /// NM_011344                                      |
| 819 | Luc7l                     | Luc7 homolog (S. cerevisiae)-like                                                | 8.99E-04 | NM_025881 /// NM_028190                                         |
| 820 | Traf6                     | TNF receptor-associated factor 6                                                 | 8.99E-04 | NM_009424 /// XM_001479093 /// XM_001479837                     |
| 821 | Sertad2                   | SERTA domain containing 2                                                        | 9.01E-04 | NM_001038625 /// NM_021372                                      |
| 822 | C1gal1                    | core 1 synthase, glycoprotein-N-acetylgalactosamine 3-beta-galactosyltransferase | 9.08E-04 | NM_052993                                                       |
| 823 | Clcn3                     | chloride channel 3                                                               | 9.10E-04 | NM_007711 /// NM_173873 /// NM_173874 /// NM_173876             |
| 824 | Xlr3a /// Xlr3b /// Xlr3c | X-linked lymphocyte-regulated 3A /// X-linked lymphocyte-regulated 3B /// X-link | 9.11E-04 | NM_001081643 /// NM_001110784 /// NM_011726 /// NM_011727 /// X |
| 825 | Hemk1                     | HemK methyltransferase family member 1                                           | 9.17E-04 | NM_133984                                                       |



|     |                               |                                                                                  |          |                                                                            |
|-----|-------------------------------|----------------------------------------------------------------------------------|----------|----------------------------------------------------------------------------|
| 826 | Sirt7                         | sirtuin 7 (silent mating type information regulation 2, homolog) 7 (S. cerevisia | 9.19E-04 | NM_153056                                                                  |
| 827 | Rock2                         | Rho-associated coiled-coil containing protein kinase 2                           | 9.23E-04 | NM_009072                                                                  |
| 828 | Gpr177                        | G protein-coupled receptor 177                                                   | 9.24E-04 | NM_026582                                                                  |
| 829 | Cd320                         | CD320 antigen                                                                    | 9.26E-04 | NM_019421                                                                  |
| 830 | Ralgps2                       | Ral GEF with PH domain and SH3 binding motif 2                                   | 9.28E-04 | NM_001159965 /// NM_001159966 /// NM_001159967 /// NM_001159968            |
| 831 | Kcmf1                         | potassium channel modulatory factor 1                                            | 9.33E-04 | NM_019715 /// XM_001477544                                                 |
| 832 | Rbm7                          | RNA binding motif protein 7                                                      | 9.35E-04 | NM_144948                                                                  |
| 833 | Acp1                          | acid phosphatase 1, soluble                                                      | 9.36E-04 | NM_001110239 /// NM_021330                                                 |
| 834 | Rere                          | arginine glutamic acid dipeptide (RE) repeats                                    | 9.38E-04 | NM_001085492 /// XM_204015 /// XM_907824                                   |
| 835 | D0H4S114                      | DNA segment, human D4S114                                                        | 9.38E-04 | NM_001109988 /// NM_001109989 /// NM_001109990 /// NM_053078               |
| 836 | Zfp790                        | zinc finger protein 790                                                          | 9.40E-04 | NM_001145880 /// NM_146185                                                 |
| 837 | Trappc6a                      | trafficking protein particle complex 6A                                          | 9.44E-04 | NM_025960                                                                  |
| 838 | Ttc14                         | tetratricopeptide repeat domain 14                                               | 9.48E-04 | NM_025978 /// NM_027619                                                    |
| 839 | A1428936                      | expressed sequence A1428936                                                      | 9.48E-04 | NM_153577                                                                  |
| 840 | Slc25a39                      | Solute carrier family 25, member 39                                              | 9.56E-04 | NM_026542                                                                  |
| 841 | Zfp148                        | zinc finger protein 148                                                          | 9.56E-04 | NM_011749                                                                  |
| 842 | Pdlim5                        | PDZ and LIM domain 5                                                             | 9.59E-04 | NM_019808 /// NM_019809 /// NM_022554                                      |
| 843 | Lepre1                        | leprecan 1                                                                       | 9.61E-04 | NM_001042411 /// NM_019782 /// NM_019783                                   |
| 844 | Scpep1                        | serine carboxypeptidase 1                                                        | 9.66E-04 | NM_029023                                                                  |
| 845 | Ube3a                         | ubiquitin protein ligase E3A                                                     | 9.67E-04 | NM_001033962 /// NM_011668 /// NM_173010                                   |
| 846 | 1300001101Rik                 | RIKEN cDNA 1300001101 gene                                                       | 9.67E-04 | NM_001081158                                                               |
| 847 | Slc44a2                       | solute carrier family 44, member 2                                               | 9.68E-04 | NM_152808                                                                  |
| 848 | Fbxo36                        | F-box protein 36                                                                 | 9.70E-04 | NM_025386                                                                  |
| 849 | Cckbr                         | cholecystokinin B receptor                                                       | 9.70E-04 | NM_007627                                                                  |
| 850 | Pik3r1                        | phosphatidylinositol 3-kinase, regulatory subunit, polypeptide 1 (p85 alpha)     | 9.72E-04 | NM_001024955 /// NM_001077495                                              |
| 851 | Csf3r                         | colony stimulating factor 3 receptor (granulocyte)                               | 9.75E-04 | NM_007782                                                                  |
| 852 | Procr                         | protein C receptor, endothelial                                                  | 9.79E-04 | NM_011171                                                                  |
| 853 | Ubr7                          | ubiquitin protein ligase E3 component n-recogin 7 (putative)                     | 9.83E-04 | NM_025666                                                                  |
| 854 | Ctcf                          | CCCTC-binding factor                                                             | 9.92E-04 | NM_007794 /// NM_181322                                                    |
| 855 | Elf3c                         | eukaryotic translation initiation factor 3, subunit C                            | 9.96E-04 | NM_146200                                                                  |
| 856 | Vps72                         | vacuolar protein sorting 72 (yeast)                                              | 9.97E-04 | NM_009336                                                                  |
| 857 | Hgs                           | HGF-regulated tyrosine kinase substrate                                          | 1.00E-03 | NM_001159328 /// NM_008244                                                 |
| 858 | Mapre1                        | microtubule-associated protein, RP/EB family, member 1                           | 1.00E-03 | NM_007896                                                                  |
| 859 | Cox7c /// Gm10012 /// Gm10013 | cytochrome c oxidase, subunit VIIc /// cytochrome c oxidase, subunit VIIc pseudo | 1.00E-03 | NM_007749 /// NR_028042 /// XM_001477253 /// XM_001477263 /// XM_001477273 |
| 860 | Ero1lb                        | ERO1-like beta (S. cerevisiae)                                                   | 1.00E-03 | NM_026184                                                                  |
| 861 | Got1                          | glutamate oxaloacetate transaminase 1, soluble                                   | 1.01E-03 | NM_010324                                                                  |
| 862 | Nudt22                        | nudix (nucleoside diphosphate linked moiety X)-type motif 22                     | 1.01E-03 | NM_026675                                                                  |
| 863 | Mtm1                          | X-linked myotubular myopathy gene 1                                              | 1.02E-03 | NM_001164190 /// NM_001164191 /// NM_001164192 /// NM_001164193            |
| 864 | Zfp161                        | zinc finger protein 161                                                          | 1.02E-03 | NM_009547                                                                  |
| 865 | Ero1l                         | ERO1-like (S. cerevisiae)                                                        | 1.03E-03 | NM_015774                                                                  |
| 866 | Htr2b                         | 5-hydroxytryptamine (serotonin) receptor 2B                                      | 1.03E-03 | NM_008311                                                                  |
| 867 | Kat2a                         | K(lysine) acetyltransferase 2A                                                   | 1.03E-03 | NM_001038010 /// NM_020004                                                 |
| 868 | Scube1                        | signal peptide, CUB domain, EGF-like 1                                           | 1.03E-03 | NM_022723                                                                  |
| 869 | Tbc1d19                       | TBC1 domain family, member 19                                                    | 1.04E-03 | NM_144517                                                                  |
| 870 | Ugg1                          | UDP-glucose glycoprotein glucosyltransferase 1                                   | 1.05E-03 | NM_198899                                                                  |
| 871 | Ptcd1                         | tetratricopeptide repeat domain 1                                                | 1.05E-03 | NM_133735                                                                  |

|     |                                    |                                                                                     |          |                                                                   |
|-----|------------------------------------|-------------------------------------------------------------------------------------|----------|-------------------------------------------------------------------|
| 872 | Gng12                              | guanine nucleotide binding protein (G protein), gamma 12                            | 1.05E-03 | NM_025278                                                         |
| 873 | 2600001M11RIK                      | RIKEN cDNA 2600001M11 gene                                                          | 1.06E-03 | ---                                                               |
| 874 | Mttr2                              | myotubularin related protein 2                                                      | 1.06E-03 | NM_023858 /// NR_024025                                           |
| 875 | Rpl17                              | ribosomal protein L17                                                               | 1.06E-03 | NM_001002239                                                      |
| 876 | Srprb                              | signal recognition particle receptor, B subunit                                     | 1.06E-03 | NM_009275                                                         |
| 877 | Cdkn1b                             | cyclin-dependent kinase inhibitor 1B                                                | 1.07E-03 | NM_009875                                                         |
| 878 | Bcl7c                              | B-cell CLL/lymphoma 7C                                                              | 1.07E-03 | NM_009746                                                         |
| 879 | Synrg                              | synergin, gamma                                                                     | 1.07E-03 | NM_001115009 /// NM_194341                                        |
| 880 | Gpr137b                            | G protein-coupled receptor 137B                                                     | 1.07E-03 | NM_031999                                                         |
| 881 | Ankrd17                            | ankyrin repeat domain 17                                                            | 1.08E-03 | NM_030886 /// NM_198010                                           |
| 882 | Cdh5                               | cadherin 5                                                                          | 1.08E-03 | NM_009868                                                         |
| 883 | Wac                                | WW domain containing adaptor with coiled-coil                                       | 1.08E-03 | NM_001146298 /// NM_153085 /// NR_027465                          |
| 884 | Zfp704                             | zinc finger protein 704                                                             | 1.08E-03 | NM_133218                                                         |
| 885 | 3300001P08RIK                      | RIKEN cDNA 3300001P08 gene                                                          | 1.09E-03 | NM_026313                                                         |
| 886 | Acvr1b                             | activin A receptor, type 1B                                                         | 1.09E-03 | NM_007395                                                         |
| 887 | Gbp6                               | guanylate binding protein 6                                                         | 1.09E-03 | NM_001083312 /// NM_145545                                        |
| 888 | 1200009O22RIK                      | RIKEN cDNA 1200009O22 gene                                                          | 1.09E-03 | NM_025817                                                         |
| 889 | Il1rl1                             | interleukin 1 receptor-like 1                                                       | 1.09E-03 | NM_001025602 /// NM_010743                                        |
| 890 | Zfp445                             | zinc finger protein 445                                                             | 1.09E-03 | NM_173364                                                         |
| 891 | Ltb4r1                             | leukotriene B4 receptor 1                                                           | 1.10E-03 | NM_008519                                                         |
| 892 | B4galt7                            | xylosylprotein beta1,4-galactosyltransferase, polypeptide 7 (galactosyltransferase) | 1.10E-03 | NM_146045                                                         |
| 893 | 2310075K07RIK                      | RIKEN cDNA 2310075K07 gene                                                          | 1.11E-03 | ---                                                               |
| 894 | Stx18                              | syntaxin 18                                                                         | 1.11E-03 | NM_026959                                                         |
| 895 | Spg7                               | spastic paraplegia 7 homolog (human)                                                | 1.11E-03 | NM_153176                                                         |
| 896 | Cpd                                | carboxypeptidase D                                                                  | 1.11E-03 | NM_007754                                                         |
| 897 | Zdhhc4                             | zinc finger, DHHC domain containing 4                                               | 1.11E-03 | NM_028379                                                         |
| 898 | Prrg2                              | proline-rich Gla (G-carboxyglutamic acid) polypeptide 2                             | 1.12E-03 | NM_022999                                                         |
| 899 | Glce                               | glucuronyl C5-epimerase                                                             | 1.12E-03 | NM_033320                                                         |
| 900 | Arl2                               | ADP-ribosylation factor-like 2                                                      | 1.13E-03 | NM_019722                                                         |
| 901 | Mxd4                               | Max dimerization protein 4                                                          | 1.13E-03 | NM_010753                                                         |
| 902 | Elk3                               | ELK3, member of ETS oncogene family                                                 | 1.15E-03 | NM_013508 /// NM_205536                                           |
| 903 | Shroom3                            | shroom family member 3                                                              | 1.15E-03 | NM_001077595 /// NM_001077596 /// NM_015756                       |
| 904 | Pfdn1                              | prefoldin 1                                                                         | 1.16E-03 | NM_026027                                                         |
| 905 | Cmpk2                              | cytidine monophosphate (UMP-CMP) kinase 2, mitochondrial                            | 1.16E-03 | NM_020557                                                         |
| 906 | Speer4f                            | spermatogenesis associated glutamate (E)-rich protein 4f                            | 1.16E-03 | NM_027609                                                         |
| 907 | Vapb                               | vesicle-associated membrane protein, associated protein B and C                     | 1.17E-03 | NM_019806                                                         |
| 908 | Tsn                                | translin                                                                            | 1.17E-03 | NM_011650                                                         |
| 909 | Pank1                              | pantothenate kinase 1                                                               | 1.17E-03 | NM_001114339 /// NM_023792                                        |
| 910 | Rab22a                             | RAB22A, member RAS oncogene family                                                  | 1.18E-03 | NM_024436                                                         |
| 911 | Dab2                               | disabled homolog 2 (Drosophila)                                                     | 1.18E-03 | NM_001008702 /// NM_001037905 /// NM_001102400 /// NM_023118      |
| 912 | Rbp1                               | retinol binding protein 1, cellular                                                 | 1.18E-03 | NM_011254 /// XM_001473622                                        |
| 913 | S1pr1                              | sphingosine-1-phosphate receptor 1                                                  | 1.18E-03 | NM_007901                                                         |
| 914 | Cysltr1                            | cysteiny leukotriene receptor 1                                                     | 1.18E-03 | NM_021476                                                         |
| 915 | Hist1h3a /// Hist1h3b /// Hist1h3c | histone cluster 1, H3a /// histone cluster 1, H3b /// histone cluster 1, H3c ///    | 1.18E-03 | NM_013548 /// NM_013550 /// NM_019469 /// NM_054045 /// NM_145011 |
| 916 | Clock                              | circadian locomotor output cycles kaput                                             | 1.19E-03 | NM_007715                                                         |
| 917 | Rheb1                              | Ras homolog enriched in brain like 1                                                | 1.19E-03 | NM_026967                                                         |

|     |                            |                                                                                  |          |                                                                 |
|-----|----------------------------|----------------------------------------------------------------------------------|----------|-----------------------------------------------------------------|
| 918 | Brunol4                    | bruno-like 4, RNA binding protein (Drosophila)                                   | 1.20E-03 | NM_001146292 /// NM_001146293 /// NM_001146294 /// NM_001146295 |
| 919 | Polr1b                     | polymerase (RNA) I polypeptide B                                                 | 1.20E-03 | NM_009086                                                       |
| 920 | Plekhj1                    | pleckstrin homology domain containing, family J member 1                         | 1.20E-03 | NM_023900                                                       |
| 921 | Napa                       | N-ethylmaleimide sensitive fusion protein attachment protein alpha               | 1.20E-03 | NM_025898                                                       |
| 922 | Gmfb                       | glia maturation factor, beta                                                     | 1.21E-03 | NM_022023                                                       |
| 923 | Prpf40a                    | PRP40 pre-mRNA processing factor 40 homolog A (yeast)                            | 1.21E-03 | NM_018785                                                       |
| 924 | Ehd1                       | EH-domain containing 1                                                           | 1.22E-03 | NM_010119                                                       |
| 925 | Rapgef3                    | Rap guanine nucleotide exchange factor (GEF) 3                                   | 1.22E-03 | NM_144850                                                       |
| 926 | Foxp1                      | forkhead box P1                                                                  | 1.23E-03 | NM_053202                                                       |
| 927 | Gfm1                       | G elongation factor, mitochondrial 1                                             | 1.23E-03 | NM_138591                                                       |
| 928 | Lztr1                      | leucine-zipper-like transcriptional regulator, 1                                 | 1.24E-03 | NM_025808                                                       |
| 929 | Cyhr1                      | cysteine and histidine rich 1                                                    | 1.24E-03 | NM_019396 /// NM_180962                                         |
| 930 | Ric8                       | resistance to inhibitors of cholinesterase 8 homolog (C. elegans)                | 1.24E-03 | NM_053194                                                       |
| 931 | Hps1                       | Hermansky-Pudlak syndrome 1 homolog (human)                                      | 1.24E-03 | NM_019424                                                       |
| 932 | Rap1gap                    | Rap1 GTPase-activating protein                                                   | 1.24E-03 | NM_001081155                                                    |
| 933 | Brms1                      | breast cancer metastasis-suppressor 1                                            | 1.24E-03 | NM_134155                                                       |
| 934 | Aftph                      | aftiphilin                                                                       | 1.25E-03 | NM_181411                                                       |
| 935 | 2210016L21Rik              | RIKEN cDNA 2210016L21 gene                                                       | 1.26E-03 | NM_028211                                                       |
| 936 | App1                       | adaptor protein, phosphotyrosine interaction, PH domain and leucine zipper conta | 1.26E-03 | NM_145221                                                       |
| 937 | Ccdc93                     | coiled-coil domain containing 93                                                 | 1.26E-03 | NM_001025156 /// NM_027567 /// NM_029955                        |
| 938 | Bclaf1                     | BCL2-associated transcription factor 1                                           | 1.27E-03 | NM_001025392 /// NM_001025393 /// NM_153787                     |
| 939 | Fdft1                      | farnesyl diphosphate farnesyl transferase 1                                      | 1.27E-03 | NM_010191                                                       |
| 940 | Il4ra                      | interleukin 4 receptor, alpha                                                    | 1.28E-03 | NM_001008700                                                    |
| 941 | Elf3a                      | eukaryotic translation initiation factor 3, subunit A                            | 1.28E-03 | NM_010123                                                       |
| 942 | Akr7a5                     | aldo-keto reductase family 7, member A5 (aflatoxin aldehyde reductase)           | 1.28E-03 | NM_025337                                                       |
| 943 | Zadh2                      | zinc binding alcohol dehydrogenase, domain containing 2                          | 1.28E-03 | NM_146090                                                       |
| 944 | Dph5                       | DPH5 homolog (S. cerevisiae)                                                     | 1.28E-03 | NM_027193                                                       |
| 945 | Nek6                       | NIMA (never in mitosis gene a)-related expressed kinase 6                        | 1.28E-03 | NM_001159631 /// NM_021606                                      |
| 946 | Tcerg1                     | transcription elongation regulator 1 (CA150)                                     | 1.29E-03 | NM_001039474                                                    |
| 947 | Bmp6                       | bone morphogenetic protein 6                                                     | 1.29E-03 | NM_007556                                                       |
| 948 | Arg2                       | arginase type II                                                                 | 1.30E-03 | NM_009705                                                       |
| 949 | Ly6d                       | lymphocyte antigen 6 complex, locus D                                            | 1.30E-03 | NM_010742                                                       |
| 950 | Usp2                       | ubiquitin specific peptidase 2                                                   | 1.31E-03 | NM_016808 /// NM_198091 /// NM_198092                           |
| 951 | Pvt1                       | plasmacytoma variant translocation 1                                             | 1.31E-03 | NR_003368                                                       |
| 952 | Gpr137b /// Gpr137b-ps /// | G protein-coupled receptor 137B /// G protein-coupled receptor 137B, pseudogene  | 1.31E-03 | NM_031999 /// NR_003568 /// XM_001473441 /// XR_001658          |
| 953 | Irf5                       | interferon regulatory factor 5                                                   | 1.32E-03 | NM_012057                                                       |
| 954 | Parva                      | parvin, alpha                                                                    | 1.32E-03 | NM_020606                                                       |
| 955 | Enpp2                      | ectonucleotide pyrophosphatase/phosphodiesterase 2                               | 1.34E-03 | NM_001136077 /// NM_015744                                      |
| 956 | Taf7                       | TAF7 RNA polymerase II, TATA box binding protein (TBP)-associated factor         | 1.35E-03 | NM_011901 /// NM_175770                                         |
| 957 | Ptplad2                    | protein tyrosine phosphatase-like A domain containing 2                          | 1.36E-03 | NM_025760                                                       |
| 958 | G0s2                       | G0/G1 switch gene 2                                                              | 1.36E-03 | NM_008059                                                       |
| 959 | ---                        | ---                                                                              | 1.37E-03 | ---                                                             |
| 960 | Rnf157                     | ring finger protein 157                                                          | 1.37E-03 | NM_027258 /// XM_001003576 /// XM_001003581 /// XM_126776       |
| 961 | Acacb /// LOC100047358     | acetyl-Coenzyme A carboxylase beta /// similar to acetyl-Coenzyme A carboxylase  | 1.37E-03 | NM_133904 /// XR_033562                                         |
| 962 | Klf13                      | Kruppel-like factor 13                                                           | 1.37E-03 | NM_021366                                                       |
| 963 | Gm2382 /// Mthfs           | predicted gene 2382 /// 5, 10-methenyltetrahydrofolate synthetase                | 1.37E-03 | NM_001128601 /// NM_026829 /// XM_001473273                     |

|      |                          |                                                                                  |          |                                                                  |
|------|--------------------------|----------------------------------------------------------------------------------|----------|------------------------------------------------------------------|
| 964  | ---                      | ---                                                                              | 1.38E-03 | ---                                                              |
| 965  | Ascc1                    | activating signal cointegrator 1 complex subunit 1                               | 1.38E-03 | NM_026937                                                        |
| 966  | Plxdc2                   | plexin domain containing 2                                                       | 1.40E-03 | NM_026162                                                        |
| 967  | 2210419D22Rik            | RIKEN cDNA 2210419D22 gene                                                       | 1.40E-03 | ---                                                              |
| 968  | Ak3                      | adenylate kinase 3                                                               | 1.41E-03 | NM_021299                                                        |
| 969  | Wwc2                     | WW, C2 and coiled-coil domain containing 2                                       | 1.41E-03 | NM_133791                                                        |
| 970  | Ifitm1                   | interferon induced transmembrane protein 1                                       | 1.41E-03 | NM_001112715 /// NM_026820                                       |
| 971  | Tesk1                    | testis specific protein kinase 1                                                 | 1.41E-03 | NM_011571                                                        |
| 972  | Tradd                    | TNFRSF1A-associated via death domain                                             | 1.42E-03 | NM_001033161                                                     |
| 973  | Ccdc132                  | coiled-coil domain containing 132                                                | 1.42E-03 | NM_024260                                                        |
| 974  | Tnfrsf13b                | tumor necrosis factor receptor superfamily, member 13b                           | 1.42E-03 | NM_021349                                                        |
| 975  | Rbm5                     | RNA binding motif protein 5                                                      | 1.42E-03 | NM_148930                                                        |
| 976  | Cebpd                    | CCAAT/enhancer binding protein (C/EBP), delta                                    | 1.42E-03 | NM_007679                                                        |
| 977  | Pde6d                    | phosphodiesterase 6D, cGMP-specific, rod, delta                                  | 1.42E-03 | NM_008801                                                        |
| 978  | Igf2as                   | insulin-like growth factor 2, antisense                                          | 1.42E-03 | NR_002855                                                        |
| 979  | Trim54                   | tripartite motif-containing 54                                                   | 1.43E-03 | NM_021447                                                        |
| 980  | Vamp1                    | vesicle-associated membrane protein 1                                            | 1.43E-03 | NM_001080557 /// NM_009496                                       |
| 981  | Nomo1                    | nodal modulator 1                                                                | 1.43E-03 | NM_153057                                                        |
| 982  | Clock                    | circadian locomotor output cycles kaput                                          | 1.44E-03 | NM_007715                                                        |
| 983  | Nop58                    | NOP58 ribonucleoprotein homolog (yeast)                                          | 1.44E-03 | NM_018868                                                        |
| 984  | Dgkz                     | diacylglycerol kinase zeta                                                       | 1.44E-03 | NM_138306                                                        |
| 985  | Serp1nb1a                | serine (or cysteine) peptidase inhibitor, clade B, member 1a                     | 1.45E-03 | NM_025429                                                        |
| 986  | Slamf9                   | SLAM family member 9                                                             | 1.45E-03 | NM_029612                                                        |
| 987  | Wwtr1                    | WW domain containing transcription regulator 1                                   | 1.45E-03 | NM_133784                                                        |
| 988  | Itpr1                    | inositol 1,4,5-triphosphate receptor 1                                           | 1.46E-03 | NM_010585                                                        |
| 989  | Gm11560 /// Gm6540 /// L | CCAAT-binding protein /// predicted gene 6540 /// similar to transcription facto | 1.46E-03 | NM_011732 /// XM_001473821 /// XR_001819 /// XR_030657 /// XR_03 |
| 990  | Phip                     | pleckstrin homology domain interacting protein                                   | 1.46E-03 | NM_001081216                                                     |
| 991  | 6720475J19Rik            | RIKEN cDNA 6720475J19 gene                                                       | 1.47E-03 | XM_001474896 /// XM_001481296                                    |
| 992  | Gne                      | glucosamine                                                                      | 1.47E-03 | NM_015828                                                        |
| 993  | D0H4S114                 | DNA segment, human D4S114                                                        | 1.47E-03 | NM_001109988 /// NM_001109989 /// NM_001109990 /// NM_053078     |
| 994  | Dctn6                    | dynactin 6                                                                       | 1.47E-03 | NM_011722                                                        |
| 995  | Glul                     | glutamate-ammonia ligase (glutamine synthetase)                                  | 1.48E-03 | NM_008131                                                        |
| 996  | Ftsj3                    | FtsJ homolog 3 (E. coli)                                                         | 1.48E-03 | NM_025310                                                        |
| 997  | Plk2                     | PTK2 protein tyrosine kinase 2                                                   | 1.49E-03 | NM_001130409 /// NM_007982                                       |
| 998  | Refbp2 /// Thoc4         | RNA and export factor binding protein 2 /// THO complex 4                        | 1.49E-03 | NM_011568 /// NM_019484                                          |
| 999  | Selm                     | selenoprotein M                                                                  | 1.50E-03 | NM_053267                                                        |
| 1000 | Acad10                   | acyl-Coenzyme A dehydrogenase family, member 10                                  | 1.50E-03 | NM_028037                                                        |
| 1001 | Ier3                     | immediate early response 3                                                       | 1.51E-03 | NM_133662                                                        |
| 1002 | A1413582                 | expressed sequence A1413582                                                      | 1.51E-03 | NM_001002895                                                     |
| 1003 | Ubp1                     | upstream binding protein 1                                                       | 1.51E-03 | NM_001083319 /// NM_013699                                       |
| 1004 | Ms4a4c                   | membrane-spanning 4-domains, subfamily A, member 4C                              | 1.52E-03 | NM_029499                                                        |
| 1005 | Dsn1                     | DSN1, MIND kinetochore complex component, homolog (S. cerevisiae)                | 1.52E-03 | NM_025853                                                        |
| 1006 | Sepn1                    | selenoprotein N, 1                                                               | 1.52E-03 | NM_029100                                                        |
| 1007 | Ppp2ca                   | protein phosphatase 2 (formerly 2A), catalytic subunit, alpha isoform            | 1.53E-03 | NM_019411                                                        |
| 1008 | Scel                     | sciellin                                                                         | 1.54E-03 | NM_022886                                                        |
| 1009 | Kdm4b                    | lysine (K)-specific demethylase 4B                                               | 1.54E-03 | NM_172132                                                        |

|      |                           |                                                                                  |          |                                                              |
|------|---------------------------|----------------------------------------------------------------------------------|----------|--------------------------------------------------------------|
| 1010 | Supt16h                   | suppressor of Ty 16 homolog ( <i>S. cerevisiae</i> )                             | 1.56E-03 | NM_033618                                                    |
| 1011 | Osr1                      | odd-skipped related 1 ( <i>Drosophila</i> )                                      | 1.56E-03 | NM_011859                                                    |
| 1012 | Cd84                      | CD84 antigen                                                                     | 1.56E-03 | NM_013489                                                    |
| 1013 | LOC100046746 /// Smap1    | similar to SMAP1 /// stromal membrane-associated protein 1                       | 1.56E-03 | NM_028534 /// XM_001476743                                   |
| 1014 | Arl6ip1                   | ADP-ribosylation factor-like 6 interacting protein 1                             | 1.57E-03 | NM_019419                                                    |
| 1015 | Glc1c1 /// Gm5815 /// LOC | glucocorticoid induced transcript 1 /// predicted gene 5815 /// similar to gluco | 1.57E-03 | NM_133236 /// XM_001475372 /// XM_619479 /// XM_914705       |
| 1016 | Arid5b /// LOC100044968   | AT rich interactive domain 5B (MRF1-like) /// similar to modulator recognition f | 1.57E-03 | NM_023598 /// XM_001473421                                   |
| 1017 | Ick                       | intestinal cell kinase                                                           | 1.57E-03 | NM_001163780 /// NM_019987                                   |
| 1018 | 8-Sep                     | septin 8                                                                         | 1.58E-03 | NM_033144                                                    |
| 1019 | Mier2                     | mesoderm induction early response 1, family member 2                             | 1.58E-03 | NM_027422                                                    |
| 1020 | Sel1l                     | sel-1 suppressor of lin-12-like ( <i>C. elegans</i> )                            | 1.58E-03 | NM_001039089 /// NM_011344                                   |
| 1021 | Plxdc1                    | plexin domain containing 1                                                       | 1.59E-03 | NM_001163608 /// NM_028199                                   |
| 1022 | Zc3hc1                    | zinc finger, C3HC type 1                                                         | 1.59E-03 | NM_172735                                                    |
| 1023 | Prr5                      | proline rich 5 (renal)                                                           | 1.60E-03 | NM_146061                                                    |
| 1024 | Pck2                      | phosphoenolpyruvate carboxykinase 2 (mitochondrial)                              | 1.61E-03 | NM_028994                                                    |
| 1025 | Kpna1                     | karyopherin (importin) alpha 1                                                   | 1.61E-03 | NM_008465                                                    |
| 1026 | Rtt1                      | rotatin                                                                          | 1.62E-03 | NM_175542                                                    |
| 1027 | Wsb2                      | WD repeat and SOCS box-containing 2                                              | 1.63E-03 | NM_021539                                                    |
| 1028 | Fbn1                      | fibrillin 1                                                                      | 1.63E-03 | NM_007993                                                    |
| 1029 | 4-Sep                     | septin 4                                                                         | 1.63E-03 | NM_011129                                                    |
| 1030 | Ankzf1                    | ankyrin repeat and zinc finger domain containing 1                               | 1.63E-03 | NM_026187                                                    |
| 1031 | Rps4y2                    | ribosomal protein S4, Y-linked 2                                                 | 1.63E-03 | NR_003634 /// XR_035148 /// XR_035151                        |
| 1032 | Bcl2l1                    | BCL2-like 1                                                                      | 1.64E-03 | NM_009743                                                    |
| 1033 | Tpm3                      | tropomyosin 3, gamma                                                             | 1.64E-03 | NM_022314                                                    |
| 1034 | Tm2d1                     | TM2 domain containing 1                                                          | 1.65E-03 | NM_053157                                                    |
| 1035 | Dnajc1                    | DnaJ (Hsp40) homolog, subfamily C, member 1                                      | 1.65E-03 | NM_007869                                                    |
| 1036 | Abhd6                     | abhydrolase domain containing 6                                                  | 1.66E-03 | NM_025341                                                    |
| 1037 | Zbp1                      | Z-DNA binding protein 1                                                          | 1.66E-03 | NM_001139519 /// NM_021394                                   |
| 1038 | Ddx42                     | DEAD (Asp-Glu-Ala-Asp) box polypeptide 42                                        | 1.66E-03 | NM_028074                                                    |
| 1039 | Zfx                       | zinc finger protein X-linked                                                     | 1.66E-03 | NM_001044386 /// NM_011768                                   |
| 1040 | Its1                      | intersectin 1 (SH3 domain protein 1A)                                            | 1.66E-03 | NM_001110275 /// NM_001110276 /// NM_010587                  |
| 1041 | Ehbp111                   | EH domain binding protein 1-like 1                                               | 1.67E-03 | NM_001114595 /// NM_001114596 /// NM_001114597 /// NM_053252 |
| 1042 | D2Erttd391e               | DNA segment, Chr 2, ERATO Doi 391, expressed                                     | 1.68E-03 | NM_145528                                                    |
| 1043 | Zfp444                    | zinc finger protein 444                                                          | 1.68E-03 | NM_001146024 /// NM_028316                                   |
| 1044 | Ncaph                     | non-SMC condensin I complex, subunit H                                           | 1.68E-03 | NM_144818                                                    |
| 1045 | Sbno1                     | sno, strawberry notch homolog 1 ( <i>Drosophila</i> )                            | 1.68E-03 | NM_001081203                                                 |
| 1046 | Plprm                     | protein tyrosine phosphatase, receptor type, M                                   | 1.69E-03 | NM_008984                                                    |
| 1047 | Acp1                      | acid phosphatase 1, soluble                                                      | 1.69E-03 | NM_001110239 /// NM_021330                                   |
| 1048 | Serf1                     | small EDRK-rich factor 1                                                         | 1.69E-03 | NM_011353                                                    |
| 1049 | Adam15                    | a disintegrin and metallopeptidase domain 15 (metargidin)                        | 1.70E-03 | NM_001037722 /// NM_009614                                   |
| 1050 | Dna2                      | DNA replication helicase 2 homolog (yeast)                                       | 1.70E-03 | NM_177372                                                    |
| 1051 | Cd93                      | CD93 antigen                                                                     | 1.70E-03 | NM_010740                                                    |
| 1052 | Unc45a                    | Unc-45 homolog A ( <i>C. elegans</i> )                                           | 1.71E-03 | NM_133952                                                    |
| 1053 | Serpinf1                  | serine (or cysteine) peptidase inhibitor, clade F, member 1                      | 1.71E-03 | NM_011340                                                    |
| 1054 | Map2k7                    | mitogen-activated protein kinase kinase 7                                        | 1.71E-03 | NM_001042557 /// NM_001164172 /// NM_011944                  |
| 1055 | Maea                      | macrophage erythroblast attacher                                                 | 1.71E-03 | NM_021500                                                    |

|      |               |                                                                            |          |                                             |
|------|---------------|----------------------------------------------------------------------------|----------|---------------------------------------------|
| 1056 | Ccnd2         | cyclin D2                                                                  | 1.71E-03 | NM_009829                                   |
| 1057 | Fzd8          | frizzled homolog 8 (Drosophila)                                            | 1.71E-03 | NM_008058                                   |
| 1058 | Itga9         | integrin alpha 9                                                           | 1.73E-03 | NM_001113514 /// NM_133721                  |
| 1059 | Ccl11         | chemokine (C-C motif) ligand 11                                            | 1.73E-03 | NM_011330                                   |
| 1060 | ---           | ---                                                                        | 1.73E-03 | ---                                         |
| 1061 | Grb2          | growth factor receptor bound protein 2                                     | 1.73E-03 | NM_008163                                   |
| 1062 | Gpr19         | G protein-coupled receptor 19                                              | 1.75E-03 | NM_008157                                   |
| 1063 | Kdm6a         | 4lysine (K)-specific demethylase 6A                                        | 1.75E-03 | NM_009483                                   |
| 1064 | Tmco4         | transmembrane and coiled-coil domains 4                                    | 1.77E-03 | NM_029857                                   |
| 1065 | Sh3glb2       | SH3-domain GRB2-like endophilin B2                                         | 1.77E-03 | NM_139302                                   |
| 1066 | Kitl          | kit ligand                                                                 | 1.77E-03 | NM_013598                                   |
| 1067 | Pptc7         | PTC7 protein phosphatase homolog (S. cerevisiae)                           | 1.77E-03 | NM_177242                                   |
| 1068 | Arhgap6       | Rho GTPase activating protein 6                                            | 1.78E-03 | NM_009707 /// NM_178754                     |
| 1069 | Smc4          | structural maintenance of chromosomes 4                                    | 1.79E-03 | NM_133786                                   |
| 1070 | Tex10         | testis expressed gene 10                                                   | 1.79E-03 | NM_172304                                   |
| 1071 | Cd80          | CD80 antigen                                                               | 1.80E-03 | NM_009855                                   |
| 1072 | Tiparp        | TCDD-inducible poly(ADP-ribose) polymerase                                 | 1.81E-03 | NM_178892                                   |
| 1073 | Mettl6        | methyltransferase like 6                                                   | 1.82E-03 | NM_025907                                   |
| 1074 | Mta3          | metastasis associated 3                                                    | 1.82E-03 | NM_054082                                   |
| 1075 | Seh1l         | SEH1-like (S. cerevisiae)                                                  | 1.82E-03 | NM_001039088 /// NM_028112                  |
| 1076 | Fkbp9         | FK506 binding protein 9                                                    | 1.83E-03 | NM_012056                                   |
| 1077 | Ereg          | epiregulin                                                                 | 1.83E-03 | NM_007950                                   |
| 1078 | Smc6          | structural maintenance of chromosomes 6                                    | 1.83E-03 | NM_025695                                   |
| 1079 | Sash3         | SAM and SH3 domain containing 3                                            | 1.83E-03 | NM_028773                                   |
| 1080 | Slc6a8        | solute carrier family 6 (neurotransmitter transporter, creatine), member 8 | 1.84E-03 | NM_001142809 /// NM_001142810 /// NM_133987 |
| 1081 | O610007P08RIK | RIKEN cDNA O610007P08 gene                                                 | 1.84E-03 | NM_001013608 /// NM_023507                  |
| 1082 | Spint2        | serine protease inhibitor, Kunitz type 2                                   | 1.84E-03 | NM_001082548 /// NM_011464                  |
| 1083 | Ptprk         | protein tyrosine phosphatase, receptor type, K                             | 1.84E-03 | NM_008983                                   |
| 1084 | Cyp4b1        | cytochrome P450, family 4, subfamily b, polypeptide 1                      | 1.84E-03 | NM_007823                                   |
| 1085 | Luc7l2        | LUC7-like 2 (S. cerevisiae)                                                | 1.85E-03 | NM_138680                                   |
| 1086 | Dpysl3        | dihydropyrimidinase-like 3                                                 | 1.85E-03 | NM_001136086 /// NM_009468                  |
| 1087 | Arsa          | arylsulfatase A                                                            | 1.85E-03 | NM_009713                                   |
| 1088 | Ttc1          | tetratricopeptide repeat domain 1                                          | 1.87E-03 | NM_133795                                   |
| 1089 | Papss2        | 3'-phosphoadenosine 5'-phosphosulfate synthase 2                           | 1.87E-03 | NM_011864                                   |
| 1090 | Sh2d1b1       | SH2 domain protein 1B1                                                     | 1.88E-03 | NM_012009                                   |
| 1091 | Abcc5         | ATP-binding cassette, sub-family C (CFTR/MRP), member 5                    | 1.89E-03 | NM_013790 /// NM_176839                     |
| 1092 | Rgs17         | regulator of G-protein signaling 17                                        | 1.89E-03 | NM_001161822 /// NM_019958                  |
| 1093 | Otub1         | OTU domain, ubiquitin aldehyde binding 1                                   | 1.89E-03 | NM_134150                                   |
| 1094 | Rbm25         | RNA binding motif protein 25                                               | 1.89E-03 | NM_025930 /// NM_027349                     |
| 1095 | Timm17b       | translocase of inner mitochondrial membrane 17b                            | 1.90E-03 | NM_011591                                   |
| 1096 | Exosc5        | exosome component 5                                                        | 1.92E-03 | NM_138586                                   |
| 1097 | Xrcc5         | X-ray repair complementing defective repair in Chinese hamster cells 5     | 1.92E-03 | NM_009533                                   |
| 1098 | Cspp1         | centrosome and spindle pole associated protein 1                           | 1.94E-03 | NM_026493                                   |
| 1099 | Malat1        | metastasis associated lung adenocarcinoma transcript 1 (non-coding RNA)    | 1.95E-03 | NR_002847                                   |
| 1100 | Myst4         | MYST histone acetyltransferase monocytic leukemia 4                        | 1.95E-03 | NM_017479                                   |
| 1101 | Pplg          | peptidyl-prolyl isomerase G (cyclophilin G)                                | 1.95E-03 | NM_001081086                                |

|      |                      |                                                                                  |          |                                                                 |
|------|----------------------|----------------------------------------------------------------------------------|----------|-----------------------------------------------------------------|
| 1102 | 2610030H06Rik        | RIKEN cDNA 2610030H06 gene                                                       | 1.96E-03 | NM_001081356                                                    |
| 1103 | Nab2                 | Ngfi-A binding protein 2                                                         | 1.97E-03 | NM_001122895 /// NM_008668                                      |
| 1104 | Suv420h1             | suppressor of variegation 4-20 homolog 1 (Drosophila)                            | 1.97E-03 | NM_144871                                                       |
| 1105 | Dock1                | dedicator of cytokinesis 1                                                       | 1.98E-03 | NM_001033420                                                    |
| 1106 | Kpna4                | karyopherin (importin) alpha 4                                                   | 1.98E-03 | NM_008467                                                       |
| 1107 | Smarca5              | SWI/SNF related, matrix associated, actin dependent regulator of chromatin, subf | 1.98E-03 | NM_053124                                                       |
| 1108 | Fas                  | Fas (TNF receptor superfamily member 6)                                          | 1.98E-03 | NM_001146708 /// NM_007987                                      |
| 1109 | 1810063B05Rik        | RIKEN cDNA 1810063B05 gene                                                       | 1.99E-03 | NM_174987                                                       |
| 1110 | Asl                  | argininosuccinate lyase                                                          | 1.99E-03 | NM_133768                                                       |
| 1111 | Trmt1                | TRM1 tRNA methyltransferase 1 homolog (S. cerevisiae)                            | 1.99E-03 | NM_001164559 /// NM_001164560 /// NM_198020                     |
| 1112 | Serinc1              | serine incorporator 1                                                            | 1.99E-03 | NM_019760                                                       |
| 1113 | Scrn2                | secernin 2                                                                       | 1.99E-03 | NM_146027                                                       |
| 1114 | Cd200r1              | CD200 receptor 1                                                                 | 2.00E-03 | NM_021325                                                       |
| 1115 | Irs1                 | insulin receptor substrate 1                                                     | 2.01E-03 | NM_010570                                                       |
| 1116 | Mbtd1                | mbt domain containing 1                                                          | 2.01E-03 | NM_134012                                                       |
| 1117 | Secisbp2l            | SECIS binding protein 2-like                                                     | 2.01E-03 | NM_177608                                                       |
| 1118 | Elp4                 | elongation protein 4 homolog (S. cerevisiae)                                     | 2.01E-03 | NM_023876                                                       |
| 1119 | Rabepk               | Rab9 effector protein with kelch motifs                                          | 2.01E-03 | NM_145522                                                       |
| 1120 | Ssb                  | Sjogren syndrome antigen B                                                       | 2.02E-03 | NM_001110145 /// NM_009278                                      |
| 1121 | Atg5                 | autophagy-related 5 (yeast)                                                      | 2.02E-03 | NM_053069                                                       |
| 1122 | Orc4l                | origin recognition complex, subunit 4-like (S. cerevisiae)                       | 2.02E-03 | NM_011958                                                       |
| 1123 | Cfh /// LOC100048018 | complement component factor h /// similar to complement component factor H       | 2.03E-03 | NM_009888 /// XM_001479650                                      |
| 1124 | Fam160b1             | family with sequence similarity 160, member B1                                   | 2.03E-03 | NM_145505                                                       |
| 1125 | Gucy2e               | guanylate cyclase 2e                                                             | 2.03E-03 | NM_008192                                                       |
| 1126 | Atp5s                | ATP synthase, H+ transporting, mitochondrial F0 complex, subunit s               | 2.04E-03 | NM_026536                                                       |
| 1127 | Scy1l                | SCY1-like 1 (S. cerevisiae)                                                      | 2.04E-03 | NM_023912                                                       |
| 1128 | Extl2                | exostosins (multiple)-like 2                                                     | 2.04E-03 | NM_001163514 /// NM_001163515 /// NM_021388                     |
| 1129 | Aldoc                | aldolase C, fructose-bisphosphate                                                | 2.05E-03 | NM_009657                                                       |
| 1130 | Pmvk                 | phosphomevalonate kinase                                                         | 2.05E-03 | NM_026784 /// NM_027348                                         |
| 1131 | A930001N09Rik        | RIKEN cDNA A930001N09 gene                                                       | 2.06E-03 | NM_029870                                                       |
| 1132 | Grina                | glutamate receptor, ionotropic, N-methyl D-aspartate-associated protein 1 (gluta | 2.06E-03 | NM_023168                                                       |
| 1133 | Tiparp               | TCDD-inducible poly(ADP-ribose) polymerase                                       | 2.07E-03 | NM_178892                                                       |
| 1134 | Scara3               | scavenger receptor class A, member 3                                             | 2.07E-03 | NM_172604                                                       |
| 1135 | Mlycd                | malonyl-CoA decarboxylase                                                        | 2.08E-03 | NM_019966                                                       |
| 1136 | Cand1                | cullin associated and neddylation disassociated 1                                | 2.08E-03 | NM_027994 /// XM_125901 /// XM_904108                           |
| 1137 | Tpcn2                | two pore segment channel 2                                                       | 2.08E-03 | NM_146206                                                       |
| 1138 | Ccdc77               | coiled-coil domain containing 77                                                 | 2.08E-03 | NM_026028                                                       |
| 1139 | Ihh                  | Indian hedgehog                                                                  | 2.08E-03 | NM_010544                                                       |
| 1140 | Cd36                 | CD36 antigen                                                                     | 2.08E-03 | NM_001159555 /// NM_001159556 /// NM_001159557 /// NM_001159558 |
| 1141 | Eprs                 | glutamyl-prolyl-tRNA synthetase                                                  | 2.09E-03 | NM_029735                                                       |
| 1142 | Atoh8                | atonal homolog 8 (Drosophila)                                                    | 2.09E-03 | NM_153778                                                       |
| 1143 | Bod1l                | bioorientation of chromosomes in cell division 1-like                            | 2.10E-03 | NM_001081422                                                    |
| 1144 | Acs1l                | acyl-CoA synthetase long-chain family member 1                                   | 2.11E-03 | NM_007981                                                       |
| 1145 | Dcun1d1              | DCN1, defective in cullin neddylation 1, domain containing 1 (S. cerevisiae)     | 2.11E-03 | NM_033623                                                       |
| 1146 | Pnn                  | pinin                                                                            | 2.12E-03 | NM_008891                                                       |
| 1147 | Bxdc5                | brix domain containing 5                                                         | 2.13E-03 | NM_027332 /// NM_027371                                         |

|      |                          |                                                                                  |          |                            |
|------|--------------------------|----------------------------------------------------------------------------------|----------|----------------------------|
| 1148 | Solh                     | small optic lobes homolog (Drosophila)                                           | 2.13E-03 | NM_015830                  |
| 1149 | Cp                       | ceruloplasmin                                                                    | 2.14E-03 | NM_001042611 /// NM_007752 |
| 1150 | Arid1a                   | AT rich interactive domain 1A (SWI-like)                                         | 2.14E-03 | NM_001080819               |
| 1151 | Rlf                      | rearranged L-myc fusion sequence                                                 | 2.14E-03 | NM_001081013               |
| 1152 | Trim62                   | tripartite motif-containing 62                                                   | 2.15E-03 | NM_178110                  |
| 1153 | Camkk2                   | calcium/calmodulin-dependent protein kinase kinase 2, beta                       | 2.16E-03 | NM_145358                  |
| 1154 | Nov                      | nephroblastoma overexpressed gene                                                | 2.16E-03 | NM_010930                  |
| 1155 | Ippk                     | inositol 1,3,4,5,6-pentakisphosphate 2-kinase                                    | 2.17E-03 | NM_199056                  |
| 1156 | Stk19                    | serine/threonine kinase 19                                                       | 2.17E-03 | NM_019442                  |
| 1157 | Skp2                     | S-phase kinase-associated protein 2 (p45)                                        | 2.17E-03 | NM_013787 /// NM_145468    |
| 1158 | 2010111101RIK            | RIKEN cDNA 2010111101 gene                                                       | 2.18E-03 | NM_028079                  |
| 1159 | Eomes                    | eomesodermin homolog (Xenopus laevis)                                            | 2.18E-03 | NM_010136                  |
| 1160 | Spon2                    | spondin 2, extracellular matrix protein                                          | 2.19E-03 | NM_133903                  |
| 1161 | D9Erttd306e              | DNA segment, Chr 9, ERATO Doi 306, expressed                                     | 2.20E-03 | ---                        |
| 1162 | Apcdd1                   | adenomatosis polyposis coli down-regulated 1                                     | 2.20E-03 | NM_133237                  |
| 1163 | Pip5K1b                  | phosphatidylinositol-4-phosphate 5-kinase, type 1 beta                           | 2.20E-03 | NM_008846                  |
| 1164 | Pias1                    | protein inhibitor of activated STAT 1                                            | 2.20E-03 | NM_019663                  |
| 1165 | Me2                      | malic enzyme 2, NAD(+)-dependent, mitochondrial                                  | 2.20E-03 | NM_145494                  |
| 1166 | Ccnh                     | cyclin H                                                                         | 2.21E-03 | NM_023243                  |
| 1167 | Zfp622                   | zinc finger protein 622                                                          | 2.21E-03 | NM_144523                  |
| 1168 | Mfhas1                   | malignant fibrous histiocytoma amplified sequence 1                              | 2.21E-03 | NM_001081279               |
| 1169 | Meis1                    | Meis homeobox 1                                                                  | 2.21E-03 | NM_010789                  |
| 1170 | Pros1                    | protein S (alpha)                                                                | 2.22E-03 | NM_011173                  |
| 1171 | Phf23                    | PHD finger protein 23                                                            | 2.24E-03 | NM_030064                  |
| 1172 | Ptges                    | prostaglandin E synthase                                                         | 2.24E-03 | NM_022415                  |
| 1173 | Vangl1                   | vang-like 1 (van gogh, Drosophila)                                               | 2.24E-03 | NM_177545                  |
| 1174 | Fabp4                    | fatty acid binding protein 4, adipocyte                                          | 2.24E-03 | NM_024406                  |
| 1175 | Edf1                     | endothelial differentiation-related factor 1                                     | 2.25E-03 | NM_021519                  |
| 1176 | Sparcl1                  | SPARC-like 1                                                                     | 2.26E-03 | NM_010097                  |
| 1177 | Vps41                    | vacuolar protein sorting 41 (yeast)                                              | 2.26E-03 | NM_172120                  |
| 1178 | LOC100046775 /// Slc35a1 | similar to CMP-sialic acid transporter /// solute carrier family 35 (CMP-sialic  | 2.26E-03 | NM_011895 /// XM_001476786 |
| 1179 | Clstn1                   | calyntenin 1                                                                     | 2.26E-03 | NM_023051                  |
| 1180 | Wipi1                    | WD repeat domain, phosphoinositide interacting 1                                 | 2.27E-03 | NM_145940                  |
| 1181 | Pitpnc1                  | phosphatidylinositol transfer protein, cytoplasmic 1                             | 2.27E-03 | NM_145823                  |
| 1182 | Nav2                     | neuron navigator 2                                                               | 2.27E-03 | NM_001111016 /// NM_175272 |
| 1183 | Sfmbt2                   | Scm-like with four mbt domains 2                                                 | 2.27E-03 | NM_177386                  |
| 1184 | Nfkbie                   | nuclear factor of kappa light polypeptide gene enhancer in B-cells inhibitor, ep | 2.28E-03 | NM_008690                  |
| 1185 | Ypel5                    | yippee-like 5 (Drosophila)                                                       | 2.28E-03 | NM_027166                  |
| 1186 | Kif5b                    | kinesin family member 5B                                                         | 2.28E-03 | NM_008448                  |
| 1187 | Faah                     | fatty acid amide hydrolase                                                       | 2.28E-03 | NM_010173                  |
| 1188 | Slain1                   | SLAIN motif family, member 1                                                     | 2.30E-03 | NM_198014                  |
| 1189 | Igfbp5                   | insulin-like growth factor binding protein 5                                     | 2.30E-03 | NM_010518                  |
| 1190 | Atp6v1e1                 | ATPase, H+ transporting, lysosomal V1 subunit E1                                 | 2.30E-03 | NM_007510                  |
| 1191 | Arl6ip6                  | ADP-ribosylation factor-like 6 interacting protein 6                             | 2.31E-03 | NM_022989                  |
| 1192 | Ccnb1                    | cyclin B1                                                                        | 2.31E-03 | NM_172301                  |
| 1193 | Tmlhe                    | trimethyllysine hydroxylase, epsilon                                             | 2.32E-03 | NM_138758                  |



|      |                  |                                                                                  |          |                                                                 |
|------|------------------|----------------------------------------------------------------------------------|----------|-----------------------------------------------------------------|
| 1194 | Gm6563 /// Sarnp | SAP domain containing ribonucleoprotein pseudogene /// SAP domain containing rib | 2.32E-03 | NM_025364 /// XM_001478220 /// XM_001479601 /// XM_899946 /// X |
| 1195 | LOC677213        | similar to U2AF homology motif (UHM) kinase 1                                    | 2.33E-03 | XM_001001408                                                    |
| 1196 | Dhx36            | DEAH (Asp-Glu-Ala-His) box polypeptide 36                                        | 2.34E-03 | NM_028136                                                       |
| 1197 | Pitpnc1          | phosphatidylinositol transfer protein, cytoplasmic 1                             | 2.34E-03 | NM_145823                                                       |
| 1198 | Hsp90aa1         | heat shock protein 90, alpha (cytosolic), class A member 1                       | 2.35E-03 | NM_010480                                                       |
| 1199 | A230050P20Rik    | RIKEN cDNA A230050P20 gene                                                       | 2.35E-03 | NM_175687                                                       |
| 1200 | 1300018I05RIK    | RIKEN cDNA 1300018I05 gene                                                       | 2.35E-03 | NM_028791                                                       |
| 1201 | Srr              | serine racemase                                                                  | 2.35E-03 | NM_001163311 /// NM_013761                                      |
| 1202 | Rbp7             | retinol binding protein 7, cellular                                              | 2.35E-03 | NM_022020                                                       |
| 1203 | Eefsec           | eukaryotic elongation factor, selenocysteine-tRNA-specific                       | 2.36E-03 | NM_023060                                                       |
| 1204 | Rock1            | Rho-associated coiled-coil containing protein kinase 1                           | 2.37E-03 | NM_009071                                                       |
| 1205 | Mynn             | myoneurin                                                                        | 2.37E-03 | NM_030557                                                       |
| 1206 | Mlxip            | MLX interacting protein                                                          | 2.37E-03 | NM_133917 /// NM_177582                                         |
| 1207 | Dnajb2           | DnaJ (Hsp40) homolog, subfamily B, member 2                                      | 2.37E-03 | NM_001159883 /// NM_001159884 /// NM_001159885 /// NM_020266 /  |
| 1208 | Akr1b10          | aldo-keto reductase family 1, member B10 (aldose reductase)                      | 2.37E-03 | NM_172398                                                       |
| 1209 | Itgax            | integrin alpha X                                                                 | 2.37E-03 | NM_021334                                                       |
| 1210 | Dhx8             | DEAH (Asp-Glu-Ala-His) box polypeptide 8                                         | 2.38E-03 | NM_144831                                                       |
| 1211 | Egfr             | epidermal growth factor receptor                                                 | 2.38E-03 | NM_007912 /// NM_207655                                         |
| 1212 | Abhd8            | abhydrolase domain containing 8                                                  | 2.39E-03 | NM_022419                                                       |
| 1213 | Fam117a          | family with sequence similarity 117, memberA                                     | 2.40E-03 | NM_172543                                                       |
| 1214 | Tk2              | thymidine kinase 2, mitochondrial                                                | 2.40E-03 | NM_021028                                                       |
| 1215 | Tbc1d13          | TBC1 domain family, member 13                                                    | 2.40E-03 | NM_146252                                                       |
| 1216 | Stard3           | START domain containing 3                                                        | 2.40E-03 | NM_021547                                                       |
| 1217 | Rraga            | Ras-related GTP binding A                                                        | 2.42E-03 | NM_178376                                                       |
| 1218 | Ube2l            | ubiquitin-conjugating enzyme E2l                                                 | 2.43E-03 | NM_011665                                                       |
| 1219 | Ergic3           | ERGIC and golgi 3                                                                | 2.43E-03 | NM_025516                                                       |
| 1220 | Trip12           | thyroid hormone receptor interactor 12                                           | 2.43E-03 | NM_133975                                                       |
| 1221 | Plagl1           | pleiomorphic adenoma gene-like 1                                                 | 2.44E-03 | NM_009538                                                       |
| 1222 | Csnk1g2          | casein kinase 1, gamma 2                                                         | 2.44E-03 | NM_001159591 /// NM_134002                                      |
| 1223 | Usp53            | ubiquitin specific peptidase 53                                                  | 2.45E-03 | NM_133857                                                       |
| 1224 | Cask             | calcium/calmodulin-dependent serine protein kinase (MAGUK family)                | 2.45E-03 | NM_009806                                                       |
| 1225 | Stard10          | START domain containing 10                                                       | 2.45E-03 | NM_019990                                                       |
| 1226 | 2810453I06Rik    | RIKEN cDNA 2810453I06 gene                                                       | 2.46E-03 | NM_026050 /// NM_133703                                         |
| 1227 | Fam174a          | family with sequence similarity 174, member A                                    | 2.47E-03 | NM_026321                                                       |
| 1228 | Sptlc1           | serine palmitoyltransferase, long chain base subunit 1                           | 2.47E-03 | NM_009269                                                       |
| 1229 | Zbtb25           | zinc finger and BTB domain containing 25                                         | 2.47E-03 | NM_028356                                                       |
| 1230 | Zfp101           | zinc finger protein 101                                                          | 2.47E-03 | NM_009542                                                       |
| 1231 | Adhfe1           | alcohol dehydrogenase, iron containing, 1                                        | 2.47E-03 | NM_175236 /// NR_027664                                         |
| 1232 | Igfbp7           | insulin-like growth factor binding protein 7                                     | 2.48E-03 | NM_001159518 /// NM_008048                                      |
| 1233 | Ppat             | phosphoribosyl pyrophosphate amidotransferase                                    | 2.48E-03 | NM_172146 /// XM_001002879 /// XM_001002886 /// XM_896000 /// X |
| 1234 | Ankzf1           | ankyrin repeat and zinc finger domain containing 1                               | 2.49E-03 | NM_026187                                                       |
| 1235 | Vegfb            | vascular endothelial growth factor B                                             | 2.49E-03 | NM_011697                                                       |
| 1236 | Pcolce           | procollagen C-endopeptidase enhancer protein                                     | 2.50E-03 | NM_008788                                                       |
| 1237 | Tnk2             | tyrosine kinase, non-receptor, 2                                                 | 2.50E-03 | NM_001110147 /// NM_016788                                      |
| 1238 | Tspan2           | tetraspanin 2                                                                    | 2.51E-03 | NM_027533                                                       |
| 1239 | Esrra            | estrogen related receptor, alpha                                                 | 2.51E-03 | NM_007953                                                       |

|      |                          |                                                                                  |          |                                                                 |
|------|--------------------------|----------------------------------------------------------------------------------|----------|-----------------------------------------------------------------|
| 1240 | Oplah                    | 5-oxoprolinase (ATP-hydrolysing)                                                 | 2.51E-03 | NM_153122                                                       |
| 1241 | Wsb2                     | WD repeat and SOCS box-containing 2                                              | 2.51E-03 | NM_021539                                                       |
| 1242 | Osbpl5                   | oxysterol binding protein-like 5                                                 | 2.52E-03 | NM_024289                                                       |
| 1243 | Tmem30a                  | transmembrane protein 30A                                                        | 2.52E-03 | NM_133718                                                       |
| 1244 | Fcgr4                    | Fc receptor, IgG, low affinity IV                                                | 2.53E-03 | NM_144559                                                       |
| 1245 | Pqlc1                    | PQ loop repeat containing 1                                                      | 2.53E-03 | NM_001164420 /// NM_001164421 /// NM_001164422 /// NM_001164423 |
| 1246 | Dnm1                     | dynamin 1                                                                        | 2.53E-03 | NM_010065                                                       |
| 1247 | Elk4                     | ELK4, member of ETS oncogene family                                              | 2.54E-03 | NM_007923                                                       |
| 1248 | Agl                      | amylase, 1,6-glycosidase, 4-alpha-glucanotransferase                             | 2.55E-03 | NM_001081326                                                    |
| 1249 | Efnb2                    | ephrin B2                                                                        | 2.55E-03 | NM_010111                                                       |
| 1250 | Dnttip2                  | deoxynucleotidyltransferase, terminal, interacting protein 2                     | 2.55E-03 | NM_153806                                                       |
| 1251 | Pkig                     | protein kinase inhibitor, gamma                                                  | 2.55E-03 | NM_001039390 /// NM_001039391 /// NM_001164053 /// NM_001164054 |
| 1252 | Tusc4                    | tumor suppressor candidate 4                                                     | 2.57E-03 | NM_018879                                                       |
| 1253 | Slc25a38                 | solute carrier family 25, member 38                                              | 2.57E-03 | NM_144793                                                       |
| 1254 | Ppp6c                    | protein phosphatase 6, catalytic subunit                                         | 2.58E-03 | NM_024209                                                       |
| 1255 | Zkscan3                  | zinc finger with KRAB and SCAN domains 3                                         | 2.58E-03 | NM_001145778 /// NM_023685                                      |
| 1256 | Mrpl54                   | mitochondrial ribosomal protein L54                                              | 2.59E-03 | NM_025317                                                       |
| 1257 | Gsn                      | gelsolin                                                                         | 2.59E-03 | NM_146120                                                       |
| 1258 | Gm2397                   | predicted gene 2397                                                              | 2.60E-03 | XM_001473420                                                    |
| 1259 | Klc4                     | kinesin light chain 4                                                            | 2.60E-03 | NM_029091                                                       |
| 1260 | Cp                       | ceruloplasmin                                                                    | 2.60E-03 | NM_001042611 /// NM_007752                                      |
| 1261 | Ino80                    | INO80 homolog (S. cerevisiae)                                                    | 2.61E-03 | NM_026574                                                       |
| 1262 | Tmem140                  | transmembrane protein 140                                                        | 2.61E-03 | NM_197986                                                       |
| 1263 | Nid1                     | nidogen 1                                                                        | 2.61E-03 | NM_010917                                                       |
| 1264 | Hdhd3                    | haloacid dehalogenase-like hydrolase domain containing 3                         | 2.61E-03 | NM_024257                                                       |
| 1265 | Mastl                    | microtubule associated serine/threonine kinase-like                              | 2.62E-03 | NM_025979                                                       |
| 1266 | Gramd3                   | GRAM domain containing 3                                                         | 2.62E-03 | NM_026240                                                       |
| 1267 | Wwtr1                    | WW domain containing transcription regulator 1                                   | 2.62E-03 | NM_133784                                                       |
| 1268 | Ncapg                    | non-SMC condensin I complex, subunit G                                           | 2.63E-03 | NM_019438 /// XM_485604                                         |
| 1269 | Nploc4                   | nuclear protein localization 4 homolog (S. cerevisiae)                           | 2.64E-03 | NM_199469                                                       |
| 1270 | Myo1b                    | myosin IB                                                                        | 2.65E-03 | NM_001161817 /// NM_010863                                      |
| 1271 | Msh5                     | mutS homolog 5 (E. coli)                                                         | 2.65E-03 | NM_001146215 /// NM_013600                                      |
| 1272 | Usp1                     | ubiquitin specific peptidase 1                                                   | 2.65E-03 | NM_146144                                                       |
| 1273 | Atp6v0b                  | ATPase, H+ transporting, lysosomal V0 subunit B                                  | 2.65E-03 | NM_033617                                                       |
| 1274 | 9430016H08Rik            | RIKEN cDNA 9430016H08 gene                                                       | 2.65E-03 | NM_001081181 /// XM_001478981 /// XM_907464                     |
| 1275 | Ext2                     | exostoses (multiple) 2                                                           | 2.66E-03 | NM_010163                                                       |
| 1276 | Ccbl2                    | cysteine conjugate-beta lyase 2                                                  | 2.66E-03 | NM_173763                                                       |
| 1277 | Cyp4f18 /// LOC100044433 | cytochrome P450, family 4, subfamily f, polypeptide 18 /// similar to cytochrome | 2.66E-03 | NM_024444 /// XM_001472253                                      |
| 1278 | Zfp292                   | zinc finger protein 292                                                          | 2.67E-03 | NM_013889 /// XM_620009 /// XM_909747                           |
| 1279 | Ttc30a1                  | tetratricopeptide repeat domain 30A1                                             | 2.67E-03 | NM_030188                                                       |
| 1280 | Ergic3                   | ERGIC and golgi 3                                                                | 2.68E-03 | NM_025516                                                       |
| 1281 | Slc38a10                 | solute carrier family 38, member 10                                              | 2.68E-03 | NM_024249                                                       |
| 1282 | Tapbp1                   | TAP binding protein-like                                                         | 2.68E-03 | NM_145391                                                       |
| 1283 | Errfi1                   | ERBB receptor feedback inhibitor 1                                               | 2.71E-03 | NM_133753                                                       |
| 1284 | Tax1bp1                  | Tax1 (human T-cell leukemia virus type I) binding protein 1                      | 2.72E-03 | NM_025816                                                       |
| 1285 | Ttc3                     | tetratricopeptide repeat domain 3                                                | 2.72E-03 | NM_009441                                                       |

|      |                          |                                                                                  |          |                                                                |
|------|--------------------------|----------------------------------------------------------------------------------|----------|----------------------------------------------------------------|
| 1286 | Cort                     | cortistatin                                                                      | 2.73E-03 | NM_007745                                                      |
| 1287 | Cldn7                    | claudin 7                                                                        | 2.73E-03 | NM_016887                                                      |
| 1288 | Gm5560 /// Gm8429 /// Sl | predicted gene 5560 /// predicted gene 8429 /// solute carrier family 25 (mitoch | 2.73E-03 | NM_001081233 /// NM_007451 /// XR_033177                       |
| 1289 | Mef2c                    | myocyte enhancer factor 2C                                                       | 2.74E-03 | NM_025282                                                      |
| 1290 | Ddx6                     | DEAD (Asp-Glu-Ala-Asp) box polypeptide 6                                         | 2.75E-03 | NM_001110826 /// NM_007841 /// NM_181324                       |
| 1291 | Cxcl1                    | chemokine (C-X-C motif) ligand 1                                                 | 2.75E-03 | NM_008176                                                      |
| 1292 | Scrn3                    | secernin 3                                                                       | 2.76E-03 | NM_029022                                                      |
| 1293 | Tmem199                  | transmembrane protein 199                                                        | 2.76E-03 | NM_199199                                                      |
| 1294 | Baiap2                   | brain-specific angiogenesis inhibitor 1-associated protein 2                     | 2.76E-03 | NM_001037754 /// NM_001037755 /// NM_130862                    |
| 1295 | Fam20b                   | family with sequence similarity 20, member B                                     | 2.76E-03 | NM_145413                                                      |
| 1296 | Klf4                     | Kruppel-like factor 4 (gut)                                                      | 2.76E-03 | NM_010637                                                      |
| 1297 | Coq5                     | coenzyme Q5 homolog, methyltransferase (yeast)                                   | 2.77E-03 | NM_026504                                                      |
| 1298 | Csgalnact2               | chondroitin sulfate N-acetylgalactosaminyltransferase 2                          | 2.79E-03 | NM_030165                                                      |
| 1299 | Ywhab                    | tyrosine 3-monooxygenase/tryptophan 5-monooxygenase activation protein, beta po  | 2.80E-03 | NM_018753                                                      |
| 1300 | 9430015G10Rik            | RIKEN cDNA 9430015G10 gene                                                       | 2.80E-03 | NM_145557 /// NM_177205                                        |
| 1301 | 1810048J11Rik            | RIKEN cDNA 1810048J11 gene                                                       | 2.80E-03 | NM_026327                                                      |
| 1302 | 5430417L22Rik            | RIKEN cDNA 5430417L22 gene                                                       | 2.81E-03 | ---                                                            |
| 1303 | Cnpy3                    | canopy 3 homolog (zebrafish)                                                     | 2.82E-03 | NM_028065                                                      |
| 1304 | Jarid2                   | jumonji, AT rich interactive domain 2                                            | 2.83E-03 | NM_021878                                                      |
| 1305 | Pum2                     | pumilio 2 (Drosophila)                                                           | 2.83E-03 | NM_001160219 /// NM_001160220 /// NM_001160221 /// NM_0011602  |
| 1306 | Capn1                    | calpain 1                                                                        | 2.83E-03 | NM_001110504 /// NM_007600                                     |
| 1307 | Psmf1                    | proteasome (prosome, macropain) inhibitor subunit 1                              | 2.84E-03 | NM_144889 /// NM_212446                                        |
| 1308 | Aspn                     | asporin                                                                          | 2.84E-03 | NM_025711                                                      |
| 1309 | Wdr13                    | WD repeat domain 13                                                              | 2.85E-03 | NM_026137                                                      |
| 1310 | Stk16                    | serine/threonine kinase 16                                                       | 2.86E-03 | NM_011494                                                      |
| 1311 | Slc12a8                  | solute carrier family 12 (potassium/chloride transporters), member 8             | 2.86E-03 | NM_001083902 /// NM_134251                                     |
| 1312 | Sin3a                    | transcriptional regulator, SIN3A (yeast)                                         | 2.86E-03 | NM_001110350 /// NM_001110351 /// NM_011378                    |
| 1313 | Serhl                    | serine hydrolase-like                                                            | 2.86E-03 | NM_023475                                                      |
| 1314 | Sf3b2                    | splicing factor 3b, subunit 2                                                    | 2.86E-03 | NM_030109                                                      |
| 1315 | Cp                       | ceruloplasmin                                                                    | 2.87E-03 | NM_001042611 /// NM_007752                                     |
| 1316 | Il1f9                    | interleukin 1 family, member 9                                                   | 2.88E-03 | NM_153511                                                      |
| 1317 | Tnrc6a                   | trinucleotide repeat containing 6a                                               | 2.88E-03 | NM_144925                                                      |
| 1318 | Pou2f1                   | POU domain, class 2, transcription factor 1                                      | 2.89E-03 | NM_011137 /// NM_198932 /// NM_198933 /// NM_198934            |
| 1319 | Fbxo6                    | F-box protein 6                                                                  | 2.89E-03 | NM_001163704 /// NM_001163705 /// NM_001163706 /// NM_00116370 |
| 1320 | Cstb                     | cystatin B                                                                       | 2.90E-03 | NM_007793                                                      |
| 1321 | Arrdc1                   | arrestin domain containing 1                                                     | 2.90E-03 | NM_001162485 /// NM_178408 /// NR_027876                       |

**Table S6.** Differentially expressed genes in Study 2 PC samples revealed by BETR

| No. | Gene Symbol   | Gene Title                                                            | RefSeq ID                                                    |
|-----|---------------|-----------------------------------------------------------------------|--------------------------------------------------------------|
| 2   | 1810044D09Rik | RIKEN cDNA 1810044D09 gene                                            | ---                                                          |
| 3   | Cd163         | CD163 antigen                                                         | NM_053094                                                    |
| 4   | Clcn5         | chloride channel 5                                                    | NM_016691                                                    |
| 5   | Eif2ak3       | eukaryotic translation initiation factor 2 alpha kinase 3             | NM_010121                                                    |
| 6   | Enah          | enabled homolog (Drosophila)                                          | NM_001083120 /// NM_001083121 /// NM_008680 /// NM_010135    |
| 7   | Entpd1        | ectonucleoside triphosphate diphosphohydrolase 1                      | NM_009848                                                    |
| 8   | Ero1l         | ERO1-like (S. cerevisiae)                                             | NM_015774                                                    |
| 9   | Extl2         | exostosin (multiple)-like 2                                           | NM_001163514 /// NM_001163515 /// NM_021388                  |
| 10  | Gaa           | glucosidase, alpha, acid                                              | NM_001159324 /// NM_008064                                   |
| 11  | Gdap2         | ganglioside-induced differentiation-associated-protein 2              | NM_010269                                                    |
| 12  | Gpnmb         | glycoprotein (transmembrane) nmb                                      | NM_053110                                                    |
| 13  | Klra17        | killer cell lectin-like receptor, subfamily A, member 17              | NM_133203                                                    |
| 14  | Mela          | melanoma antigen                                                      | NM_008581                                                    |
| 15  | Naglu         | alpha-N-acetylglucosaminidase (Sanfilippo disease IIIB)               | NM_013792                                                    |
| 16  | Nbea          | neurobeachin                                                          | NM_030595                                                    |
| 17  | Nedd4         | neural precursor cell expressed, developmentally down-regulated 4     | NM_010890                                                    |
| 18  | Osbpl1a       | oxysterol binding protein-like 1A                                     | NM_207530                                                    |
| 19  | Rsrc2         | arginine/serine-rich coiled-coil 2                                    | NM_001005523 /// NM_001005525 /// NM_025438                  |
| 20  | Sel1l         | sel-1 suppressor of lin-12-like (C. elegans)                          | NM_001039089 /// NM_011344                                   |
| 21  | Serbp1        | serpine1 mRNA binding protein 1                                       | NM_001113564 /// NM_001113565 /// NM_001113566 /// NM_025814 |
| 22  | Serpini1      | serine (or cysteine) peptidase inhibitor, clade I, member 1           | NM_009250                                                    |
| 23  | Smc6          | structural maintenance of chromosomes 6                               | NM_025695                                                    |
| 24  | Syng1         | synaptogyrin 1                                                        | NM_009303 /// NM_207708                                      |
| 25  | Tanc1         | tetratricopeptide repeat, ankyrin repeat and coiled-coil containing 1 | NM_198294                                                    |
| 26  | Tshz1         | teashirt zinc finger family member 1                                  | NM_001081300                                                 |
| 27  | Tubb2b        | tubulin, beta 2B                                                      | NM_023716                                                    |
| 28  | Usp14         | ubiquitin specific peptidase 14                                       | NM_001038589 /// NM_021522                                   |

**Table S7.** Differentially expressed genes in Study 2 OG samples revealed by ANOVA

| No. | Gene Symbol   | Gene Title                                                                       | p-value  | RefSeq ID                                   |
|-----|---------------|----------------------------------------------------------------------------------|----------|---------------------------------------------|
| 1   | Mela          | melanoma antigen                                                                 | 4.53E-07 | NM_008581                                   |
| 2   | Mmp23         | matrix metalloproteinase 23                                                      | 5.02E-07 | NM_011985                                   |
| 3   | Mela          | melanoma antigen                                                                 | 5.93E-07 | NM_008581                                   |
| 4   | Mapk8         | mitogen-activated protein kinase 8                                               | 8.23E-07 | NM_016700                                   |
| 5   | Cldn6         | claudin 6                                                                        | 1.56E-06 | NM_018777                                   |
| 6   | Klra17        | killer cell lectin-like receptor, subfamily A, member 17                         | 2.41E-06 | NM_133203                                   |
| 7   | Cbs           | cystathionine beta-synthase                                                      | 2.75E-06 | NM_144855 /// NM_178224                     |
| 8   | Rabggta       | Rab geranylgeranyl transferase, a subunit                                        | 2.80E-06 | NM_019519                                   |
| 9   | Ppic          | peptidylprolyl isomerase C                                                       | 3.97E-06 | NM_008908                                   |
| 10  | 6720475J19Rik | RIKEN cDNA 6720475J19 gene                                                       | 4.16E-06 | XM_001474896 /// XM_001481296               |
| 11  | Arid4b        | AT rich interactive domain 4B (RBP1-like)                                        | 4.48E-06 | NM_194262 /// NM_198122                     |
| 12  | Extl2         | exostosin (multiple)-like 2                                                      | 4.61E-06 | NM_001163514 /// NM_001163515 /// NM_021388 |
| 13  | Slc12a8       | solute carrier family 12 (potassium/chloride transporters), member 8             | 5.58E-06 | NM_001083902 /// NM_134251                  |
| 14  | Tax1bp3       | Tax1 (human T-cell leukemia virus type 1) binding protein 3                      | 8.62E-06 | NM_029564                                   |
| 15  | Mmp23         | matrix metalloproteinase 23                                                      | 1.03E-05 | NM_011985                                   |
| 16  | Mela          | Melanoma antigen                                                                 | 1.09E-05 | NM_008581                                   |
| 17  | Stmn1         | stathmin 1                                                                       | 1.28E-05 | NM_019641                                   |
| 18  | Entpd1        | ectonucleoside triphosphate diphosphohydrolase 1                                 | 1.30E-05 | NM_009848                                   |
| 19  | Cpeb3         | cytoplasmic polyadenylation element binding protein 3                            | 1.32E-05 | NM_198300                                   |
| 20  | Ccl24         | chemokine (C-C motif) ligand 24                                                  | 1.56E-05 | NM_019577                                   |
| 21  | Dclre1b       | DNA cross-link repair 1B, PSO2 homolog (S. cerevisiae)                           | 1.61E-05 | NM_001025312 /// NM_133865                  |
| 22  | Mest          | mesoderm specific transcript                                                     | 1.62E-05 | NM_008590                                   |
| 23  | Tspan1        | tetraspanin 1                                                                    | 1.78E-05 | NM_133681                                   |
| 24  | 1300018I05Rik | RIKEN cDNA 1300018I05 gene                                                       | 1.83E-05 | NM_028791                                   |
| 25  | Copg2as2      | coatamer protein complex, subunit gamma 2, antisense 2                           | 1.88E-05 | NR_002845 /// XM_001471930                  |
| 26  | Opn4          | opsin 4 (melanopsin)                                                             | 1.99E-05 | NM_001128599 /// NM_013887                  |
| 27  | Soat2         | sterol O-acyltransferase 2                                                       | 2.30E-05 | NM_146064                                   |
| 28  | Tctn3         | tectonic family member 3                                                         | 2.50E-05 | NM_026260                                   |
| 29  | Trim24        | tripartite motif-containing 24                                                   | 2.60E-05 | NM_145076                                   |
| 30  | Aif1l         | allograft inflammatory factor 1-like                                             | 2.64E-05 | NM_145144                                   |
| 31  | Bmi1          | Bmi1 polycomb ring finger oncogene                                               | 3.10E-05 | NM_007552                                   |
| 32  | Enpp1         | ectonucleotide pyrophosphatase/phosphodiesterase 1                               | 3.80E-05 | NM_008813                                   |
| 33  | Rrm1          | ribonucleotide reductase M1                                                      | 3.95E-05 | NM_009103                                   |
| 34  | Chrnd         | cholinergic receptor, nicotinic, delta polypeptide                               | 4.10E-05 | NM_021600                                   |
| 35  | Prpf19        | PRP19/PSO4 pre-mRNA processing factor 19 homolog (S. cerevisiae)                 | 4.33E-05 | NM_134129                                   |
| 36  | V1rb2         | vomerolateral 1, receptor B2                                                     | 4.41E-05 | NM_011911                                   |
| 37  | Hmmr          | hyaluronan mediated motility receptor (RHAMM)                                    | 4.55E-05 | NM_013552                                   |
| 38  | Cxcl1         | chemokine (C-X-C motif) ligand 1                                                 | 4.63E-05 | NM_008176                                   |
| 39  | Spp1          | secreted phosphoprotein 1                                                        | 4.98E-05 | NM_009263                                   |
| 40  | Copg2as2      | coatamer protein complex, subunit gamma 2, antisense 2                           | 5.01E-05 | NR_002845 /// XM_001471930                  |
| 41  | Asf1b         | ASF1 anti-silencing function 1 homolog B (S. cerevisiae)                         | 5.27E-05 | NM_024184                                   |
| 42  | Apf           | apataxin and PNKP like factor                                                    | 5.65E-05 | NM_024251                                   |
| 43  | C1galt1       | core 1 synthase, glycoprotein-N-acetylgalactosamine 3-beta-galactosyltransferase | 5.65E-05 | NM_052993                                   |

|    |                         |                                                                                  |          |                                                                 |
|----|-------------------------|----------------------------------------------------------------------------------|----------|-----------------------------------------------------------------|
| 44 | Cited2                  | Cbp/p300-interacting transactivator, with Glu/Asp-rich carboxy-terminal domain,  | 6.09E-05 | NM_010828                                                       |
| 45 | Tspan13                 | tetraspanin 13                                                                   | 6.29E-05 | NM_025359                                                       |
| 46 | Gfod2                   | glucose-fructose oxidoreductase domain containing 2                              | 6.33E-05 | NM_027469                                                       |
| 47 | Rpl13 /// Tax1bp3       | ribosomal protein L13 /// Tax1 (human T-cell leukemia virus type 1) binding prot | 6.34E-05 | NM_016738 /// NM_029564                                         |
| 48 | 6720475J19RIK           | RIKEN cDNA 6720475J19 gene                                                       | 6.38E-05 | XM_001474896 /// XM_001481296                                   |
| 49 | Acaa2                   | acetyl-Coenzyme A acyltransferase 2 (mitochondrial 3-oxoacyl-Coenzyme A thiolase | 6.40E-05 | NM_177470                                                       |
| 50 | Edem1                   | ER degradation enhancer, mannosidase alpha-like 1                                | 6.77E-05 | NM_138677                                                       |
| 51 | Prr13                   | proline rich 13                                                                  | 7.28E-05 | NM_025385                                                       |
| 52 | Xrn2                    | 5'-3' exoribonuclease 2                                                          | 7.40E-05 | NM_011917                                                       |
| 53 | Igh-6                   | immunoglobulin heavy chain 6 (heavy chain of IgM)                                | 7.59E-05 | ---                                                             |
| 54 | BC004004                | cDNA sequence BC004004                                                           | 7.89E-05 | NM_030561                                                       |
| 55 | Pon3                    | paraoxonase 3                                                                    | 8.00E-05 | NM_173006                                                       |
| 56 | Hipk1                   | homeodomain interacting protein kinase 1                                         | 8.14E-05 | NM_010432                                                       |
| 57 | Adora2b /// LOC10004523 | adenosine A2b receptor /// similar to Adenosine A2b receptor                     | 8.50E-05 | NM_007413 /// XM_001473907                                      |
| 58 | Slc18a1                 | solute carrier family 18 (vesicular monoamine), member 1                         | 9.00E-05 | NM_153054                                                       |
| 59 | Brc1                    | breast cancer 1                                                                  | 9.19E-05 | NM_009764                                                       |
| 60 | Dab1                    | disabled homolog 1 (Drosophila)                                                  | 9.44E-05 | NM_010014 /// NM_177259                                         |
| 61 | Nuf2                    | NUF2, NDC80 kinetochore complex component, homolog (S. cerevisiae)               | 9.52E-05 | NM_023284                                                       |
| 62 | Jam2                    | junction adhesion molecule 2                                                     | 9.68E-05 | NM_023844                                                       |
| 63 | Prpf19                  | PRP19/PSO4 pre-mRNA processing factor 19 homolog (S. cerevisiae)                 | 9.79E-05 | NM_134129                                                       |
| 64 | Farsb                   | phenylalanyl-tRNA synthetase, beta subunit                                       | 9.91E-05 | NM_011811                                                       |
| 65 | Lpin2                   | lipin 2                                                                          | 1.04E-04 | NM_022882                                                       |
| 66 | Blzf1                   | basic leucine zipper nuclear factor 1                                            | 1.04E-04 | NM_001160208 /// NM_001160209 /// NM_025505                     |
| 67 | Cbr2                    | carbonyl reductase 2                                                             | 1.04E-04 | NM_007621                                                       |
| 68 | Clec4d                  | C-type lectin domain family 4, member d                                          | 1.07E-04 | NM_001163161 /// NM_010819                                      |
| 69 | Ppp1r3c                 | protein phosphatase 1, regulatory (inhibitor) subunit 3C                         | 1.07E-04 | NM_016854                                                       |
| 70 | Socs2                   | suppressor of cytokine signaling 2                                               | 1.07E-04 | NM_007706                                                       |
| 71 | Leprotl1                | leptin receptor overlapping transcript-like 1                                    | 1.08E-04 | NM_026609                                                       |
| 72 | Igh-6                   | immunoglobulin heavy chain 6 (heavy chain of IgM)                                | 1.08E-04 | ---                                                             |
| 73 | Btg3 /// Gm7334         | B-cell translocation gene 3 /// B-cell translocation gene 3 pseudogene           | 1.12E-04 | NM_009770 /// NR_002700                                         |
| 74 | Ttc13                   | tetratricopeptide repeat domain 13                                               | 1.12E-04 | NM_145607                                                       |
| 75 | Xrn2                    | 5'-3' exoribonuclease 2                                                          | 1.14E-04 | NM_011917                                                       |
| 76 | Faah                    | fatty acid amide hydrolase                                                       | 1.16E-04 | NM_010173                                                       |
| 77 | Nusap1                  | nucleolar and spindle associated protein 1                                       | 1.18E-04 | NM_001042652 /// NM_133851                                      |
| 78 | ---                     | ---                                                                              | 1.21E-04 | ---                                                             |
| 79 | Lgals1                  | lectin, galactose binding, soluble 1                                             | 1.22E-04 | NM_008495                                                       |
| 80 | Snord116                | small nucleolar RNA, C/D box 116 cluster                                         | 1.23E-04 | NR_002895                                                       |
| 81 | Ggta1                   | glycoprotein galactosyltransferase alpha 1, 3                                    | 1.23E-04 | NM_001145821 /// NM_010283                                      |
| 82 | Igk-V1                  | immunoglobulin kappa chain variable 1 (V1)                                       | 1.23E-04 | ---                                                             |
| 83 | Ccl2                    | chemokine (C-C motif) ligand 2                                                   | 1.26E-04 | NM_011333                                                       |
| 84 | Sepsecs                 | Sep (O-phosphoserine) tRNA:Sec (selenocysteine) tRNA synthase                    | 1.32E-04 | NM_172490                                                       |
| 85 | Ephx1                   | epoxide hydrolase 1, microsomal                                                  | 1.33E-04 | NM_010145                                                       |
| 86 | Amz2                    | archaealysin family metallopeptidase 2                                           | 1.44E-04 | NM_025275                                                       |
| 87 | Mgea5                   | meningioma expressed antigen 5 (hyaluronidase)                                   | 1.51E-04 | NM_023799                                                       |
| 88 | Socs2                   | suppressor of cytokine signaling 2                                               | 1.52E-04 | NM_007706                                                       |
| 89 | Ralgps2                 | Ral GEF with PH domain and SH3 binding motif 2                                   | 1.58E-04 | NM_001159965 /// NM_001159966 /// NM_001159967 /// NM_001159968 |

|     |                           |                                                                                 |          |                                                                 |
|-----|---------------------------|---------------------------------------------------------------------------------|----------|-----------------------------------------------------------------|
| 90  | Rab34                     | RAB34, member of RAS oncogene family                                            | 1.66E-04 | NM_001159482 /// NM_033475                                      |
| 91  | Trim47                    | tripartite motif-containing 47                                                  | 1.67E-04 | NM_172570                                                       |
| 92  | Dna2                      | DNA replication helicase 2 homolog (yeast)                                      | 1.69E-04 | NM_177372                                                       |
| 93  | Cebpd                     | CCAAT/enhancer binding protein (C/EBP), delta                                   | 1.77E-04 | NM_007679                                                       |
| 94  | Limch1                    | LIM and calponin homology domains 1                                             | 1.77E-04 | NM_001001980                                                    |
| 95  | Ypel3                     | yippee-like 3 (Drosophila)                                                      | 1.80E-04 | NM_025347 /// NM_026875                                         |
| 96  | Cmah                      | cytidine monophospho-N-acetylneuraminic acid hydroxylase                        | 1.85E-04 | NM_001111110 /// NM_007717                                      |
| 97  | Postn                     | periostin, osteoblast specific factor                                           | 1.89E-04 | NM_015784                                                       |
| 98  | Ppp1r15b                  | protein phosphatase 1, regulatory (inhibitor) subunit 15b                       | 1.92E-04 | NM_133819                                                       |
| 99  | Rpgr /// Srpx             | retinitis pigmentosa GTPase regulator /// sushi-repeat-containing protein       | 1.94E-04 | NM_011285 /// NM_016911                                         |
| 100 | Rpia                      | ribose 5-phosphate isomerase A                                                  | 2.02E-04 | NM_009075                                                       |
| 101 | Rad51                     | RAD51 homolog (S. cerevisiae)                                                   | 2.05E-04 | NM_011234                                                       |
| 102 | LOC100047238              | similar to N-deacetylase/N-sulfotransferase 4                                   | 2.09E-04 | XM_001477706                                                    |
| 103 | Esf1                      | ESF1, nucleolar pre-rRNA processing protein, homolog (S. cerevisiae)            | 2.15E-04 | NM_001081090                                                    |
| 104 | Fkbp1a                    | FK506 binding protein 1a                                                        | 2.15E-04 | NM_008019                                                       |
| 105 | Rnase4                    | ribonuclease, RNase A family 4                                                  | 2.21E-04 | NM_021472 /// NM_201239                                         |
| 106 | Nelf                      | nasal embryonic LHRH factor                                                     | 2.21E-04 | NM_001039386 /// NM_001039387 /// NM_020276                     |
| 107 | S100a16                   | S100 calcium binding protein A16                                                | 2.24E-04 | NM_026416                                                       |
| 108 | Orc1l                     | origin recognition complex, subunit 1-like (S.cerevisiae)                       | 2.29E-04 | NM_001014425 /// NM_011015                                      |
| 109 | ---                       | ---                                                                             | 2.32E-04 | ---                                                             |
| 110 | Gdap2                     | ganglioside-induced differentiation-associated-protein 2                        | 2.34E-04 | NM_010269                                                       |
| 111 | Sncg                      | synuclein, gamma                                                                | 2.36E-04 | NM_011430                                                       |
| 112 | Pnpo                      | pyridoxine 5'-phosphate oxidase                                                 | 2.39E-04 | NM_134021                                                       |
| 113 | Nup50                     | nucleoporin 50                                                                  | 2.42E-04 | NM_016714                                                       |
| 114 | Edem2                     | ER degradation enhancer, mannosidase alpha-like 2                               | 2.45E-04 | NM_145537                                                       |
| 115 | Clca2                     | chloride channel calcium activated 2                                            | 2.46E-04 | NM_030601                                                       |
| 116 | Nbea                      | neurobeachin                                                                    | 2.48E-04 | NM_030595                                                       |
| 117 | Cdca5                     | cell division cycle associated 5                                                | 2.55E-04 | NM_026410                                                       |
| 118 | Eml5                      | echinoderm microtubule associated protein like 5                                | 2.60E-04 | NM_001081191                                                    |
| 119 | Ddx52                     | DEAD (Asp-Glu-Ala-Asp) box polypeptide 52                                       | 2.60E-04 | NM_030096                                                       |
| 120 | Glce                      | glucuronyl C5-epimerase                                                         | 2.60E-04 | NM_033320                                                       |
| 121 | Inhbb /// LOC100046802    | inhibin beta-B /// similar to Inhbb protein                                     | 2.62E-04 | NM_008381 /// XM_001476835                                      |
| 122 | Tsc1                      | tuberous sclerosis 1                                                            | 2.62E-04 | NM_022887                                                       |
| 123 | Bub1                      | budding uninhibited by benzimidazoles 1 homolog (S. cerevisiae)                 | 2.62E-04 | NM_001113179 /// NM_009772                                      |
| 124 | Tmpo                      | thymopoietin                                                                    | 2.62E-04 | NM_001080129 /// NM_001080130 /// NM_001080131 /// NM_001080132 |
| 125 | 2010205A11Rik /// Gm10883 | RIKEN cDNA 2010205A11 gene /// predicted gene 10883 /// predicted gene 1420 /// | 2.62E-04 | XM_001476664 /// XM_001476679 /// XM_001476703                  |
| 126 | Gamt                      | guanidinoacetate methyltransferase                                              | 2.64E-04 | NM_010255                                                       |
| 127 | Pcdhb14                   | protocadherin beta 14                                                           | 2.71E-04 | NM_053139                                                       |
| 128 | Gstm1                     | glutathione S-transferase, mu 1                                                 | 2.74E-04 | NM_010358                                                       |
| 129 | Slamf9                    | SLAM family member 9                                                            | 2.78E-04 | NM_029612                                                       |
| 130 | Gstm2                     | glutathione S-transferase, mu 2                                                 | 2.87E-04 | NM_008183                                                       |
| 131 | Cstb                      | cystatin B                                                                      | 2.89E-04 | NM_007793                                                       |
| 132 | Rab25                     | RAB25, member RAS oncogene family                                               | 2.89E-04 | NM_016899                                                       |
| 133 | Anxa3                     | annexin A3                                                                      | 2.91E-04 | NM_013470                                                       |

**Table S8.** Differentially expressed genes in Study 2 OG samples revealed by ANOVA

| No. | Gene Symbol            | Gene Title                                                                       | RefSeq ID                                              |
|-----|------------------------|----------------------------------------------------------------------------------|--------------------------------------------------------|
| 1   | 2810432L2RIK           | RIKEN cDNA 2810432L12 gene                                                       | NM_025944                                              |
| 2   | 3632451O06RIK          | RIKEN cDNA 3632451O06 gene                                                       | NM_026142                                              |
| 3   | 6720475J19RIK          | RIKEN cDNA 6720475J19 gene                                                       | XM_001474896 /// XM_001481296                          |
| 4   | 6720475J19RIK          | RIKEN cDNA 6720475J19 gene                                                       | XM_001474896 /// XM_001481296                          |
| 5   | 9130213B05RIK          | RIKEN cDNA 9130213B05 gene                                                       | NM_145562                                              |
| 6   | Abcc9                  | ATP-binding cassette, sub-family C (CFTR/MRP), member 9                          | NM_001044720 /// NM_011511 /// NM_021041 /// NM_021042 |
| 7   | Acaa1a                 | acetyl-Coenzyme A acyltransferase 1A                                             | NM_130864                                              |
| 8   | Acaa1a /// Acaa1b      | acetyl-Coenzyme A acyltransferase 1A /// acetyl-Coenzyme A acyltransferase 1B    | NM_130864 /// NM_146230                                |
| 9   | Acaa2                  | acetyl-Coenzyme A acyltransferase 2 (mitochondrial 3-oxoacyl-Coenzyme A thiolase | NM_177470                                              |
| 10  | Ak311 /// LOC100047616 | adenylate kinase 3-like 1 /// similar to adenylate kinase 4                      | NM_009647 /// XM_001478522                             |
| 11  | Akap12                 | A kinase (PRKA) anchor protein (gravin) 12                                       | NM_031185                                              |
| 12  | Akap2                  | A kinase (PRKA) anchor protein 2                                                 | NM_001035532 /// NM_001035533 /// NM_009649            |
| 13  | Aldoa                  | aldolase A, fructose-bisphosphate                                                | NM_007438                                              |
| 14  | Armxc1                 | armadillo repeat containing, X-linked 1                                          | NM_030066                                              |
| 15  | Aspn                   | asporin                                                                          | NM_025711                                              |
| 16  | Aspn                   | asporin                                                                          | NM_025711                                              |
| 17  | Atf5                   | activating transcription factor 5                                                | NM_030693                                              |
| 18  | Bmi1                   | Bmi1 polycomb ring finger oncogene                                               | NM_007552                                              |
| 19  | Bmi1                   | Bmi1 polycomb ring finger oncogene                                               | NM_007552                                              |
| 20  | C1galt1                | core 1 synthase, glycoprotein-N-acetylgalactosamine 3-beta-galactosyltransferase | NM_052993                                              |
| 21  | Car8                   | carbonic anhydrase 8                                                             | NM_007592                                              |
| 22  | Cav2                   | caveolin 2                                                                       | NM_016900                                              |
| 23  | Cbs                    | cystathionine beta-synthase                                                      | NM_144855 /// NM_178224                                |
| 24  | Ccdc22                 | coiled-coil domain containing 22                                                 | NM_138603                                              |
| 25  | Ccl24                  | chemokine (C-C motif) ligand 24                                                  | NM_019577                                              |
| 26  | Cd151                  | CD151 antigen                                                                    | NM_001111049 /// NM_001111050 /// NM_009842            |
| 27  | Cebpd                  | CCAAT/enhancer binding protein (C/EBP), delta                                    | NM_007679                                              |
| 28  | Chrn1                  | cholinergic receptor, nicotinic, beta polypeptide 1 (muscle)                     | NM_009601                                              |
| 29  | Chrnd                  | cholinergic receptor, nicotinic, delta polypeptide                               | NM_021600                                              |
| 30  | Cited2                 | Cbp/p300-interacting transactivator, with Glu/Asp-rich carboxy-terminal domain,  | NM_010828                                              |
| 31  | Ckap2                  | cytoskeleton associated protein 2                                                | NM_001004140                                           |
| 32  | Clca2                  | chloride channel calcium activated 2                                             | NM_030601                                              |
| 33  | Cldn6                  | claudin 6                                                                        | NM_018777                                              |
| 34  | Copg2as2               | coatamer protein complex, subunit gamma 2, antisense 2                           | NR_002845 /// XM_001471930                             |
| 35  | Copg2as2               | coatamer protein complex, subunit gamma 2, antisense 2                           | NR_002845 /// XM_001471930                             |
| 36  | Cpeb3                  | cytoplasmic polyadenylation element binding protein 3                            | NM_198300                                              |
| 37  | Cryab                  | crystallin, alpha B                                                              | NM_009964                                              |
| 38  | Cspg4                  | chondroitin sulfate proteoglycan 4                                               | NM_139001                                              |
| 39  | Cwc22                  | CWC22 spliceosome-associated protein homolog (S. cerevisiae)                     | NM_030560                                              |
| 40  | Cxcl1                  | chemokine (C-X-C motif) ligand 1                                                 | NM_008176                                              |
| 41  | Cyb5r3                 | cytochrome b5 reductase 3                                                        | NM_029787                                              |
| 42  | Dclre1b                | DNA cross-link repair 1B, PSO2 homolog (S. cerevisiae)                           | NM_001025312 /// NM_133865                             |
| 43  | Ddr2                   | discoidin domain receptor family, member 2                                       | NM_022563                                              |



|    |                           |                                                                                  |                                                                    |
|----|---------------------------|----------------------------------------------------------------------------------|--------------------------------------------------------------------|
| 44 | Dkk2                      | dickkopf homolog 2 (Xenopus laevis)                                              | NM_020265                                                          |
| 45 | Edem1                     | ER degradation enhancer, mannosidase alpha-like 1                                | NM_138677                                                          |
| 46 | Emp2                      | epithelial membrane protein 2                                                    | NM_007929                                                          |
| 47 | Enpp1                     | ectonucleotide pyrophosphatase/phosphodiesterase 1                               | NM_008813                                                          |
| 48 | Entpd1                    | ectonucleoside triphosphate diphosphohydrolase 1                                 | NM_009848                                                          |
| 49 | Evi5                      | ecotropic viral integration site 5                                               | NM_007964                                                          |
| 50 | Extl2                     | exostoses (multiple)-like 2                                                      | NM_001163514 /// NM_001163515 /// NM_021388                        |
| 51 | F3                        | coagulation factor III                                                           | NM_010171                                                          |
| 52 | F5                        | coagulation factor V                                                             | NM_007976                                                          |
| 53 | F9                        | coagulation factor IX                                                            | NM_007979                                                          |
| 54 | Fabp7                     | fatty acid binding protein 7, brain                                              | NM_021272                                                          |
| 55 | Fam54b                    | family with sequence similarity 54, member B                                     | NM_029759                                                          |
| 56 | Fermt2                    | fermitin family homolog 2 (Drosophila)                                           | NM_146054                                                          |
| 57 | Fermt2                    | fermitin family homolog 2 (Drosophila)                                           | NM_146054                                                          |
| 58 | Fibin                     | fin bud initiation factor homolog (zebrafish)                                    | NM_026271                                                          |
| 59 | Fkbp1a                    | FK506 binding protein 1a                                                         | NM_008019                                                          |
| 60 | Fkbp1a                    | FK506 binding protein 1a                                                         | NM_008019                                                          |
| 61 | Fxyd1                     | FXYD domain-containing ion transport regulator 1                                 | NM_019503 /// NM_052991 /// NM_052992 /// NM_194321                |
| 62 | Fzd7                      | frizzled homolog 7 (Drosophila)                                                  | NM_008057                                                          |
| 63 | Gdap2                     | ganglioside-induced differentiation-associated-protein 2                         | NM_010269                                                          |
| 64 | Gdf3                      | growth differentiation factor 3                                                  | NM_008108                                                          |
| 65 | Gjc1                      | gap junction protein, gamma 1                                                    | NM_001159382 /// NM_001159383 /// NM_008122                        |
| 66 | Gm10080 /// Gm5526 /// Gp | predicted gene 10080 /// predicted gene 5526 /// predicted gene 8894 /// myosin, | NM_010860 /// XM_001476215 /// XM_484859 /// XM_905351 /// XM_9934 |
| 67 | Gm5560 /// Gm8429 /// Slc | predicted gene 5560 /// predicted gene 8429 /// solute carrier family 25 (mitoch | NM_001081233 /// NM_007451 /// XR_033177                           |
| 68 | Gnl2                      | guanine nucleotide binding protein-like 2 (nucleolar)                            | NM_145552                                                          |
| 69 | Gpr137b-ps                | G protein-coupled receptor 137B, pseudogene                                      | NR_003568 /// XR_001658                                            |
| 70 | Grsf1                     | G-rich RNA sequence binding factor 1                                             | NM_001098476 /// NM_178700                                         |
| 71 | Gstm1                     | glutathione S-transferase, mu 1                                                  | NM_010358                                                          |
| 72 | Gstm1                     | glutathione S-transferase, mu 1                                                  | NM_010358                                                          |
| 73 | Gstm2                     | glutathione S-transferase, mu 2                                                  | NM_008183                                                          |
| 74 | Gtf3c2                    | general transcription factor IIIC, polypeptide 2, beta                           | NM_027901                                                          |
| 75 | Hdgfrp3                   | hepatoma-derived growth factor, related protein 3                                | NM_013886                                                          |
| 76 | Hdgfrp3                   | hepatoma-derived growth factor, related protein 3                                | NM_013886                                                          |
| 77 | Hlfpk1                    | homeodomain interacting protein kinase 1                                         | NM_010432                                                          |
| 78 | Hlcs                      | holocarboxylase synthetase (biotin- [propionyl-Coenzyme A-carboxylase (ATP-hydro | NM_139145                                                          |
| 79 | Hlx                       | H2.0-like homeobox                                                               | NM_008250                                                          |
| 80 | Hoxb6                     | homeo box B6                                                                     | NM_008269                                                          |
| 81 | Htatsf1                   | HIV TAT specific factor 1                                                        | NM_028242                                                          |
| 82 | Igfbp6                    | insulin-like growth factor binding protein 6                                     | NM_008344                                                          |
| 83 | Igfbp7                    | insulin-like growth factor binding protein 7                                     | NM_001159518 /// NM_008048                                         |
| 84 | Igh-6                     | immunoglobulin heavy chain 6 (heavy chain of IgM)                                | ---                                                                |
| 85 | Igh-6                     | immunoglobulin heavy chain 6 (heavy chain of IgM)                                | ---                                                                |
| 86 | Igk-V1                    | immunoglobulin kappa chain variable 1 (V1)                                       | ---                                                                |
| 87 | Ino80e                    | INO80 complex subunit E                                                          | NM_153580                                                          |
| 88 | Jam2                      | junction adhesion molecule 2                                                     | NM_023844                                                          |
| 89 | Kcna5                     | potassium voltage-gated channel, shaker-related subfamily, member 5              | NM_145983                                                          |

|     |                         |                                                                                   |                                                                 |
|-----|-------------------------|-----------------------------------------------------------------------------------|-----------------------------------------------------------------|
| 90  | :Khdrbs3                | :KH domain containing, RNA binding, signal transduction associated 3              | NM_010158                                                       |
| 91  | :Kif5b                  | :kinesin family member 5B                                                         | NM_008448                                                       |
| 92  | :Kif5b                  | :kinesin family member 5B                                                         | NM_008448                                                       |
| 93  | :Kitl                   | :kit ligand                                                                       | NM_013598                                                       |
| 94  | :Klra17                 | :killer cell lectin-like receptor, subfamily A, member 17                         | NM_133203                                                       |
| 95  | :Las1l                  | :LAS1-like (S. cerevisiae)                                                        | NM_152822                                                       |
| 96  | :Leng1                  | :leukocyte receptor cluster (LRC) member 1                                        | NM_027203                                                       |
| 97  | :Lgals1                 | :lectin, galactose binding, soluble 1                                             | NM_008495                                                       |
| 98  | :Limch1                 | :LIM and calponin homology domains 1                                              | NM_001001980                                                    |
| 99  | :Lims2                  | :LIM and senescent cell antigen like domains 2                                    | NM_144862                                                       |
| 100 | :Lmcd1                  | :LIM and cysteine-rich domains 1                                                  | NM_144799                                                       |
| 101 | :Lmna                   | :lamin A                                                                          | NM_001002011 /// NM_001111102 /// NM_019390                     |
| 102 | :LOC100045677 /// Mcm3  | :similar to DNA replication licensing factor MCM3 (DNA polymerase alpha holoenzym | NM_008563 /// XR_031705                                         |
| 103 | :LOC100045677 /// Mcm3  | :similar to DNA replication licensing factor MCM3 (DNA polymerase alpha holoenzym | NM_008563 /// XR_031705                                         |
| 104 | :LOC100047693 /// Pvr13 | :similar to cell adhesion molecule nectin-3 beta /// poliovirus receptor-related  | NM_021495 /// NM_021496 /// NM_021497 /// XM_001478695          |
| 105 | :Lrig1                  | :leucine-rich repeats and immunoglobulin-like domains 1                           | NM_008377                                                       |
| 106 | :Lrig1                  | :leucine-rich repeats and immunoglobulin-like domains 1                           | NM_008377                                                       |
| 107 | :Lrrflp1                | :leucine rich repeat (in FLII) interacting protein 1                              | NM_001111311 /// NM_001111312 /// NM_008515                     |
| 108 | :Lxn                    | :latexin                                                                          | NM_016753                                                       |
| 109 | :Mapk8                  | :mitogen-activated protein kinase 8                                               | NM_016700                                                       |
| 110 | :Mark1                  | :MAP/microtubule affinity-regulating kinase 1                                     | NM_145515                                                       |
| 111 | :Marveld1               | :MARVEL (membrane-associating) domain containing 1                                | XR_035382 /// XR_035422                                         |
| 112 | :Meis1                  | :Meis homeobox 1                                                                  | NM_010789                                                       |
| 113 | :Meis2                  | :Meis homeobox 2                                                                  | NM_001136072 /// NM_001159567 /// NM_001159568 /// NM_001159569 |
| 114 | :Mela                   | :melanoma antigen                                                                 | NM_008581                                                       |
| 115 | :Mela                   | :melanoma antigen                                                                 | NM_008581                                                       |
| 116 | :Mela                   | :Melanoma antigen                                                                 | NM_008581                                                       |
| 117 | :Mest                   | :mesoderm specific transcript                                                     | NM_008590                                                       |
| 118 | :Mmp23                  | :matrix metallopeptidase 23                                                       | NM_011985                                                       |
| 119 | :Mmp23                  | :matrix metallopeptidase 23                                                       | NM_011985                                                       |
| 120 | :Mpdz                   | :multiple PDZ domain protein                                                      | NM_010820                                                       |
| 121 | :Mtap7d1                | :microtubule-associated protein 7 domain containing 1                             | NM_001145970 /// NM_144941                                      |
| 122 | :Ncapg                  | :non-SMC condensin I complex, subunit G                                           | NM_019438 /// XM_485604                                         |
| 123 | :Ndn                    | :necdin                                                                           | NM_010882                                                       |
| 124 | :Ndn                    | :necdin                                                                           | NM_010882                                                       |
| 125 | :Ndn                    | :necdin                                                                           | NM_010882                                                       |
| 126 | :Ndn                    | :necdin                                                                           | NM_010882                                                       |
| 127 | :Ndn                    | :necdin                                                                           | NM_010882                                                       |
| 128 | :Neddd4l                | :neural precursor cell expressed, developmentally down-regulated gene 4-like      | NM_001114386 /// NM_031881                                      |
| 129 | :Nelf                   | :nasal embryonic LHRH factor                                                      | NM_001039386 /// NM_001039387 /// NM_020276                     |
| 130 | :Nfib                   | :nuclear factor I/B                                                               | NM_001113209 /// NM_001113210 /// NM_008687                     |
| 131 | :Nolc1                  | :nucleolar and coiled-body phosphoprotein 1                                       | NM_001039351 /// NM_001039352 /// NM_001039353 /// NM_053086    |
| 132 | :Npdc1                  | :neural proliferation, differentiation and control gene 1                         | NM_008721                                                       |
| 133 | :Npnt                   | :nephronectin                                                                     | NM_001029836 /// NM_033525                                      |
| 134 | :Nupr1                  | :nuclear protein 1                                                                | NM_019738                                                       |
| 135 | :Parva                  | :parvin, alpha                                                                    | NM_020606                                                       |

|     |                   |                                                                                   |                                             |
|-----|-------------------|-----------------------------------------------------------------------------------|---------------------------------------------|
| 136 | Pcolce            | :procollagen C-endopeptidase enhancer protein                                     | NM_008788                                   |
| 137 | Pdgfa             | :platelet derived growth factor, alpha                                            | NM_008808                                   |
| 138 | Pdk4              | :pyruvate dehydrogenase kinase, isoenzyme 4                                       | NM_013743                                   |
| 139 | Pfn2              | :profilin 2                                                                       | NM_019410                                   |
| 140 | Pfn2              | :profilin 2                                                                       | NM_019410                                   |
| 141 | Plagl1            | :pleiomorphic adenoma gene-like 1                                                 | NM_009538                                   |
| 142 | Plekha2           | :pleckstrin homology domain-containing, family A (phosphoinositide binding specif | NM_031257                                   |
| 143 | Plekha5           | :pleckstrin homology domain containing, family A member 5                         | NM_144920                                   |
| 144 | Pofut2            | :protein O-fucosyltransferase 2                                                   | NM_030262                                   |
| 145 | Pofut2            | :protein O-fucosyltransferase 2                                                   | NM_030262                                   |
| 146 | Pon3              | :paraoxonase 3                                                                    | NM_173006                                   |
| 147 | Ppap2a            | :phosphatidic acid phosphatase type 2A                                            | NM_008247 /// NM_008903                     |
| 148 | Ppap2a            | :phosphatidic acid phosphatase type 2A                                            | NM_008247 /// NM_008903                     |
| 149 | Ppargc1a          | :peroxisome proliferative activated receptor, gamma, coactivator 1 alpha          | NM_008904 /// NR_027710                     |
| 150 | Ppic              | :peptidylprolyl isomerase C                                                       | NM_008908                                   |
| 151 | Ppp1r3c           | :protein phosphatase 1, regulatory (inhibitor) subunit 3C                         | NM_016854                                   |
| 152 | Prpf19            | :PRP19/PSO4 pre-mRNA processing factor 19 homolog (S. cerevisiae)                 | NM_134129                                   |
| 153 | Prpf19            | :PRP19/PSO4 pre-mRNA processing factor 19 homolog (S. cerevisiae)                 | NM_134129                                   |
| 154 | Ptgis             | :prostaglandin I2 (prostacyclin) synthase                                         | NM_008968                                   |
| 155 | Ptgs1             | :prostaglandin-endoperoxide synthase 1                                            | NM_008969                                   |
| 156 | Ptov1             | :prostate tumor over expressed gene 1                                             | NM_133949                                   |
| 157 | Pvri3             | :poliovirus receptor-related 3                                                    | NM_021495 /// NM_021496 /// NM_021497       |
| 158 | Pygb              | :brain glycogen phosphorylase                                                     | NM_153781                                   |
| 159 | Rab34             | :RAB34, member of RAS oncogene family                                             | NM_001159482 /// NM_033475                  |
| 160 | Rab34             | :RAB34, member of RAS oncogene family                                             | NM_001159482 /// NM_033475                  |
| 161 | Rabggta           | :Rab geranylgeranyl transferase, a subunit                                        | NM_019519                                   |
| 162 | Rarres2           | :retinoic acid receptor responder (tazarotene induced) 2                          | NM_027852                                   |
| 163 | Rbm19             | :RNA binding motif protein 19                                                     | NM_028762                                   |
| 164 | Rpl13 /// Tax1bp3 | :ribosomal protein L13 /// Tax1 (human T-cell leukemia virus type I) binding prot | NM_016738 /// NM_029564                     |
| 165 | Rras              | :Harvey rat sarcoma oncogene, subgroup R                                          | NM_009101                                   |
| 166 | Ryr2              | :ryanodine receptor 2, cardiac                                                    | NM_023868                                   |
| 167 | Sel1l             | :sel-1 suppressor of lin-12-like (C. elegans)                                     | NM_001039089 /// NM_011344                  |
| 168 | Sh3d19            | :SH3 domain protein D19                                                           | NM_001082414                                |
| 169 | Slc12a8           | :solute carrier family 12 (potassium/chloride transporters), member 8             | NM_001083902 /// NM_134251                  |
| 170 | Slc25a23          | :solute carrier family 25 (mitochondrial carrier; phosphate carrier), member 23   | NM_025877                                   |
| 171 | Slco5a1           | :solute carrier organic anion transporter family, member 5A1                      | NM_172841                                   |
| 172 | Smap              | :sarcolemma associated protein                                                    | NM_032008                                   |
| 173 | Smo               | :smoothened homolog (Drosophila)                                                  | NM_176996                                   |
| 174 | Sncg              | :synuclein, gamma                                                                 | NM_011430                                   |
| 175 | Soat2             | :sterol O-acyltransferase 2                                                       | NM_146064                                   |
| 176 | Socs2             | :suppressor of cytokine signaling 2                                               | NM_007706                                   |
| 177 | Socs3             | :suppressor of cytokine signaling 3                                               | NM_007707                                   |
| 178 | Sparcl1           | :SPARC-like 1                                                                     | NM_010097                                   |
| 179 | Speg              | :SPEG complex locus                                                               | NM_001085370 /// NM_001085371 /// NM_007463 |
| 180 | Spp1              | :secreted phosphoprotein 1                                                        | NM_009263                                   |
| 181 | Sqrdl             | :sulfide quinone reductase-like (yeast)                                           | NM_001162503 /// NM_021507 /// NR_027888    |

|     |           |                                                             |                               |
|-----|-----------|-------------------------------------------------------------|-------------------------------|
| 182 | Ssfa2     | sperm specific antigen 2                                    | NM_080558                     |
| 183 | Syngr1    | synaptogyrin 1                                              | NM_009303 /// NM_207708       |
| 184 | Tax1bp3   | Tax1 (human T-cell leukemia virus type I) binding protein 3 | NM_029564                     |
| 185 | Tinagl1   | tubulointerstitial nephritis antigen-like 1                 | NM_023476                     |
| 186 | Tmem161a  | transmembrane protein 161A                                  | NM_145597                     |
| 187 | Tmem192   | transmembrane protein 192                                   | NM_001163747 /// NM_028427    |
| 188 | Tnfrsf13b | tumor necrosis factor receptor superfamily, member 13b      | NM_021349                     |
| 189 | Tnfrsf13c | tumor necrosis factor receptor superfamily, member 13c      | NM_028075                     |
| 190 | Tnpo3     | transportin 3                                               | NM_177296                     |
| 191 | Trim24    | tripartite motif-containing 24                              | NM_145076                     |
| 192 | Trim47    | tripartite motif-containing 47                              | NM_172570                     |
| 193 | Tspan2    | tetraspanin 2                                               | NM_027533                     |
| 194 | Ttc13     | tetratricopeptide repeat domain 13                          | NM_145607                     |
| 195 | Tubb6     | tubulin, beta 6                                             | NM_026473                     |
| 196 | Wwtr1     | WW domain containing transcription regulator 1              | NM_133784                     |
| 197 | Wwtr1     | WW domain containing transcription regulator 1              | NM_133784                     |
| 198 | Zc3h18    | zinc finger CCCH-type containing 18                         | NM_001029993 /// NM_001029994 |
| 199 | ---       | ---                                                         | ---                           |
| 200 | ---       | ---                                                         | ---                           |

**Table S9. Number of significantly varying genes in two independent studies**

|        |          | STUDY 1 (INITIAL) |              | STUDY 2 (VALIDATION) |              |
|--------|----------|-------------------|--------------|----------------------|--------------|
| Sample | Analysis | Gene probes       | Unique Genes | Gene probes          | Unique Genes |
| PC     | ANOVA    | 2963              | 2516*        | 1321                 | 1122*        |
| OG     | ANOVA    | 136               | 132          | 133                  | 124          |
| PC     | BETR     | 266               | 241          | 28                   | 28           |
| OG     | BETR     | 117               | 113          | 200                  | 176          |

\*estimated

**Figure S1. Histology of progressing plasma cell tumors in pristane oil-treated iMyc**

**mice.** To identify and enumerate plasma cells *in situ*, paraffin-embedded formalin-fixed tissue sections of oil granulomas analyzed at early (day 7; panels A and B), middle (day 39, panels C and D) and late (day 107; panels E and F) times after ip injection of pristane were sectioned and either stained with hematoxylin and eosin (H&E; panels A, C and E) or immunolabeled with antibody to mouse immunoglobulin kappa light chains followed by counterstaining with hematoxylin (panels B, D and F). Cytoplasmic light chains were visualized using vector red (panels B and F) or diaminobenzidine (DAB; panel D) as substrates. All images were acquired with a 40X objective.

**Figure S2. Focused analysis of gene expression changes during tumor progression in**

**initial study.** Heat map of significantly changed genes during tumor progression in LMD-isolated PC samples or non-dissected whole-tissue OG samples. A total of 1385 gene probes were selected by ANOVA and subjected to unsupervised hierarchical cluster analysis.

**Figure S3. Combined analysis of gene expression changes during tumor progression**

**in initial study (Study 1) and validation study (Study 2).** Panel A depicts a heat map that resulted from unsupervised hierarchical cluster analysis of RNAs from PC and OG samples, using 5,521 variance-filtered genes (showing the top 25% variance and of which more than 20% of expression values have at least 1.5-fold change in either direction from the gene's median value). Panel B depicts the clustering of the 1205 ANOVA-revealed gene probes ( $p < 0.001$ ) that showed significant differences in the PC samples from both experiments. The samples are ordered chronologically according to the day after which PCT development had been induced by ip administration of pristane.

**Figure S4. Time courses of expression levels of five selected ANOVA-revealed OG**

**genes up- or downregulated in tissues containing frank tumor cells compared to tissues harboring premalignant tumor precursors.** Log<sub>2</sub>-transformed mean gene expression levels (horizontal lines) and individual gene expression levels (dots) at indicated times post tumor induction with pristane are plotted for Study 1 (Initial study) in the left column and Study 2 (Validation study) in the center column. The results of statistical comparisons (two-tailed t-test) of mean expression levels of combined tumor precursor samples (white columns; days 7-33 in case of Study 1 [n=9]; days 7-49 in case of Study 2 [n=12]) and tumor samples (black columns; day 104 in case of Study 1 [n=3]; day 105 in case of Study 2 [n=3]) are indicated as *p* values in the right column. *Eif2ak3*, eukaryotic translation initiation factor 2 alpha kinase 3; *Ccl11*, chemokine (C-C motif) ligand 11; *Cd36*, CD36 antigen; *Ear1*, eosinophil-associated, ribonuclease A family, member 1; *Rab34*, RAB34 member of RAS oncogene family.

**Figure S5. Genetic pathway maps implicated in PCT progression by Metacore**

**(GeneGo) analysis.** Statistically significant maps detected at a false discovery rate (FDR) of  $10^{-4}$  in the PC samples from Study 2 (n=26) and Study 1 (n=7) are presented in panels A and B, respectively. Maps are ordered from top to bottom according to level of significance, which is expressed as negative logarithmic  $p$  value. Panel C depicts the top three significant maps at FDR  $10^{-3}$  that exhibit the greatest deal of similarity between Studies 1 and 2. The maps are indicated in bright colors. Also included are three highly similar maps that are, however, not significant at FDR  $10^{-3}$  and, therefore, indicated in dull colors.

**Figure S6. Genes involved in mouse PCT progression in mouse are highly enriched in a gene set that includes human MGUS, SMM and MM).**

**A) Human Heat Map.** Heat map of significantly differentially expressed genes (FDR < 5%) in 115 cases from the Mayo Clinic Patient Dataset deposited at the Multiple Myeloma Genomics Portal (MMGP), Broad Institute, Cambridge, Massachusetts (<http://www.broadinstitute.org/mmgp/>): MGUS (n=22), SMM (n=24) and MM (n=69). RNA samples from CD138<sup>+</sup> plasma cells from patient bone marrows had been hybridized to Affymetrix U133A microarrays and gene expression determined according to established procedures. RMA-normalized data files were transferred from the MMGP website to the University of Iowa, where ANOVA analysis of the 18,737 genes that have a mouse counterpart with the identical gene name revealed 2,292 unique, annotated genes that varied significantly among the MGUS, SMM and MM groups. These genes were represented by 2,963 gene probes, which were subjected to unsupervised hierarchical cluster analysis that produced the presented heat map. Relapsed MM, which is also included in the Mayo Clinic Patient Dataset, was excluded here because of uncertainty whether gene expression changes reflected tumor progression or treatment effects.

**B) Venn diagram on the origin and number of mouse genes used for cross-species comparison with the Mayo Clinic Patient Dataset.** The mouse ANOVA-PC-gene probe sets from Study 1 and Study 2 (corrected for genes also found in OG stroma, see Figs. 2B and 3B for details) were merged to identify probes that varied significantly in the course of PCT progression in *either* Study 1 *or* Study 2 (“combined” probe set) or in *both* Study 1 *and* Study 2 (“in-common” probe set). The merged dataset was found to be populated by more than 4,000 gene probes that represented 2,218 “combined,” unique, annotated mouse genes with synonymous human counterparts. These “combined” genes were used for the statistical comparison with the Mayo Clinic Patient Dataset presented in panel C. The merged dataset also contained 386 gene probes that represented 315 “in-common,” unique, annotated mouse genes with synonymous homologues in the human genome. These “in-common” mouse genes were used for the statistical analysis of the Mayo Clinic Patient Dataset as depicted in panel D and displayed as a heat map in panel E.

**C) Statistical analysis of the enrichment of “combined” mouse PCT progression genes in the Mayo Clinic Patient Dataset.** EASE [Expression Analysis Systematic Explorer, Hosack, et al., *Genome Biol* **4**, R70 (2003)] was employed to determine whether genes that were found to be variably expressed during progression of mouse PCT were also statistically overrepresented in the human MGUS-SMM-MM dataset presented in panel A. EASE uses concepts very similar to those employed in genetic pathway enrichment analyses; it calculates  $p$  values to indicate the statistical strength of biologic associations. 294 (12.8%) of the 2,218 unique, “combined” mouse LMD-PC genes, which were shown by ANOVA to vary significantly during the course of mouse PCT progression in *either* Study 1 *or* Study 2, were also found within the set of 2,292 human genes from the Mayo Clinic. This overlap was significant ( $p = 0.00285$ ) using the EASE software tool for statistical comparison.

**D) Statistical analysis of the enrichment of “in-common” mouse PCT progression genes in the Mayo Clinic Patient Dataset.** In a more stringent statistical analysis compared to that presented in panel C, 40 (12.7%) of the 315 “in-common” mouse LMD-PC genes – revealed by ANOVA to change significantly during mouse PCT progression in *both* Study 1 *and* Study 2 – were also found within the set of 2,292 human genes from the Mayo Clinic. This overlap was highly significant ( $p = 2.05 \times 10^{-15}$ ) by EASE, in keeping with the expectation that a 12.7% overlap of a set of 315 genes with a 2,292-gene set is much less likely to occur by chance than a 12.8% overlap of a set of 2,218 genes with the same 2,292-gene set.

**E) Cross-species heat map visualizing the enrichment of “in-common” mouse PCT progression genes in the Mayo Clinic Patient Dataset.** The human counterparts of the 315 mouse genes indicated in panel D were used to re-analyze the Mayo Clinic Dataset in an attempt to reveal heretofore unknown associations in the human samples. The results of unsupervised hierarchical clustering are displayed as a heat map. Two portions of the heat map (boxed in white) are expanded on the right and demonstrate examples of apparent up-regulation of 12 unique genes in MGUS relative to SMM and MM (top right; represented by 15 gene probes) and 7 genes upregulated in SMM/MM relative to MGUS (represented by 15 gene probes; bottom right). More in-depth studies are warranted to validate these putative myeloma progression genes and understand the underlying biology.



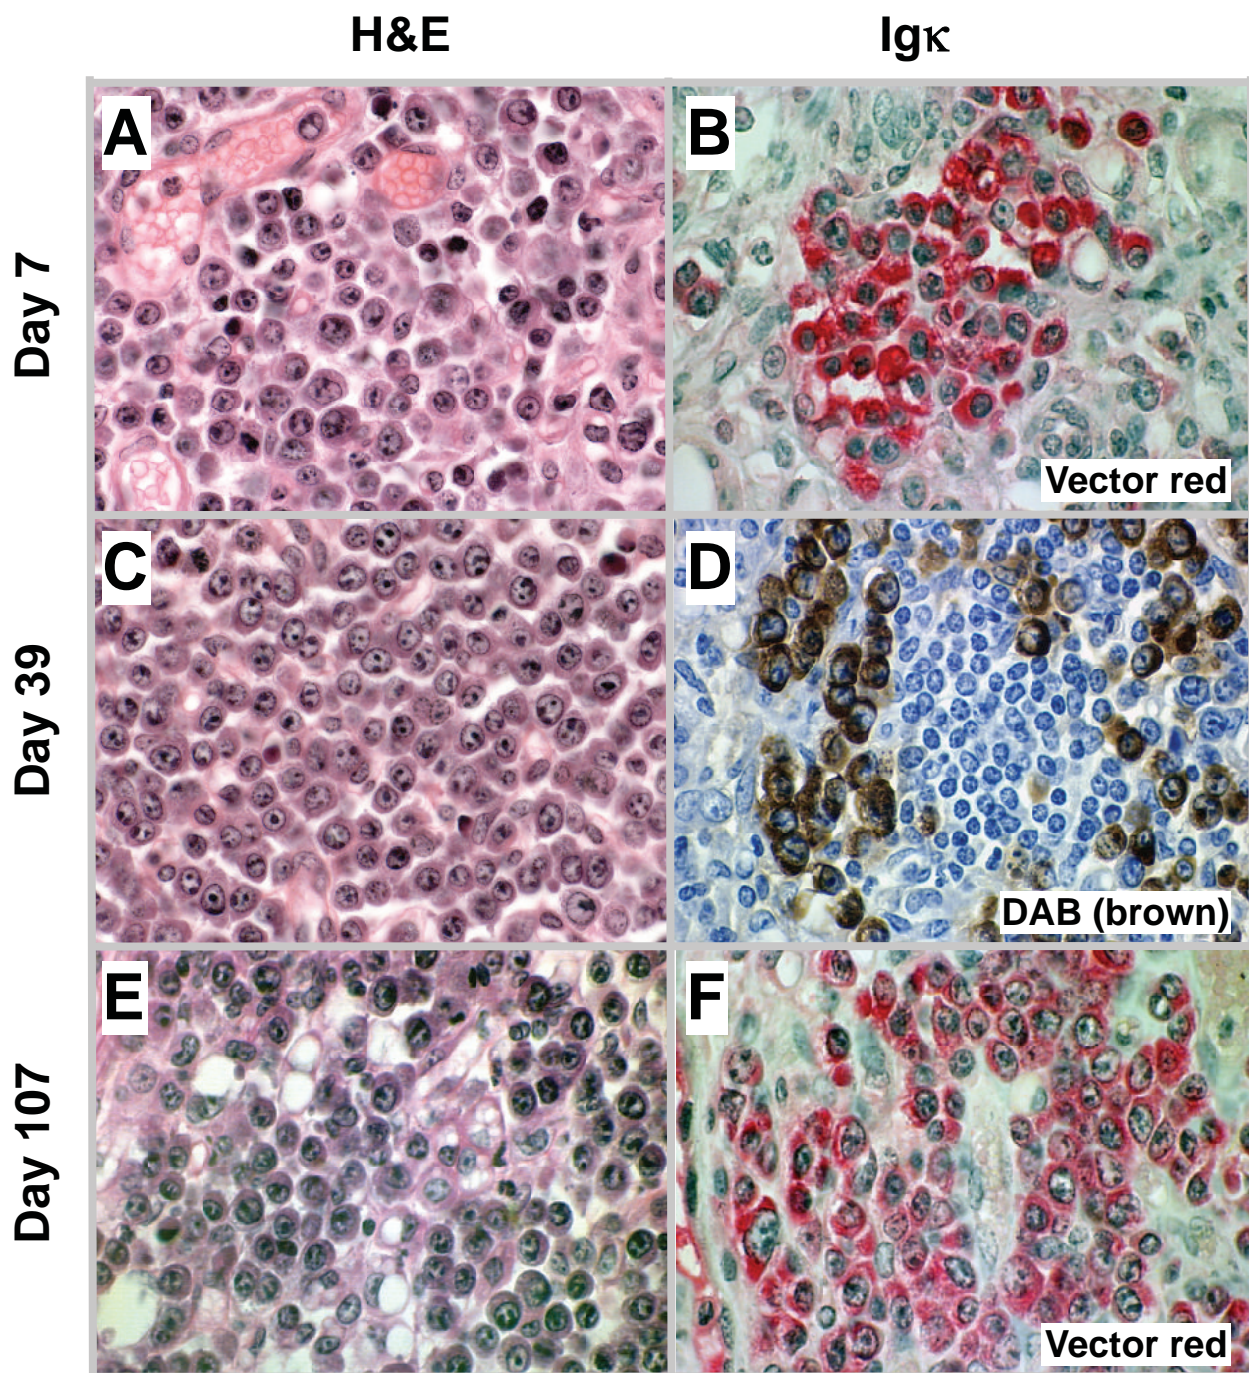

Figure S1

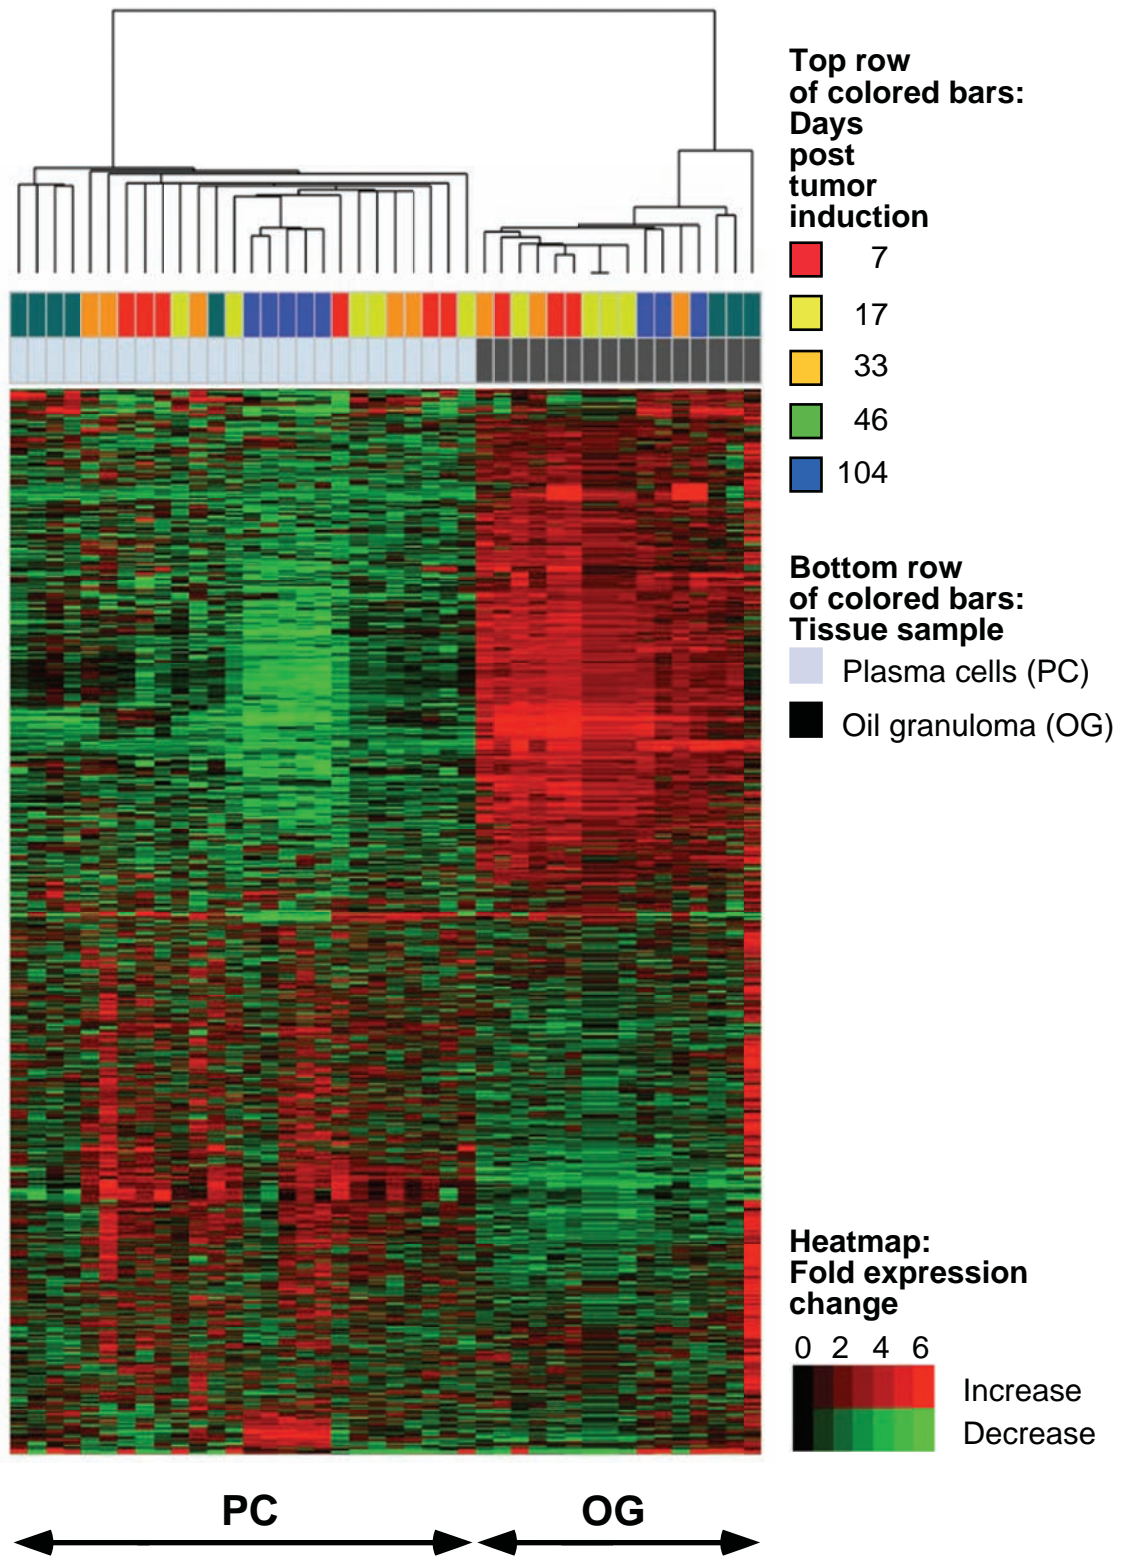

Figure S2

**A**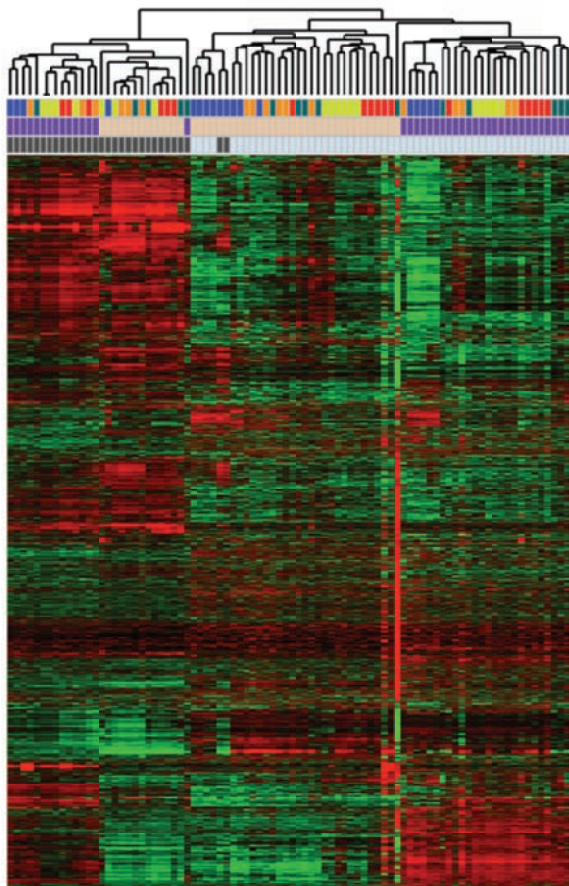

Top row of colored bars:  
Days post tumor induction

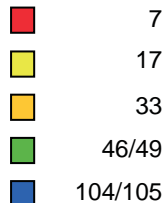

Center row of colored bars:  
Study

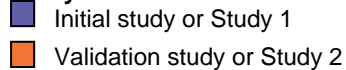

Bottom row of colored bars:  
Tissue sample

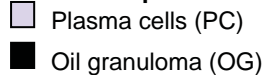

PC and OG from Studies 1 and 2

Heatmap:  
Fold expression change

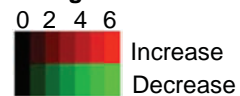**B**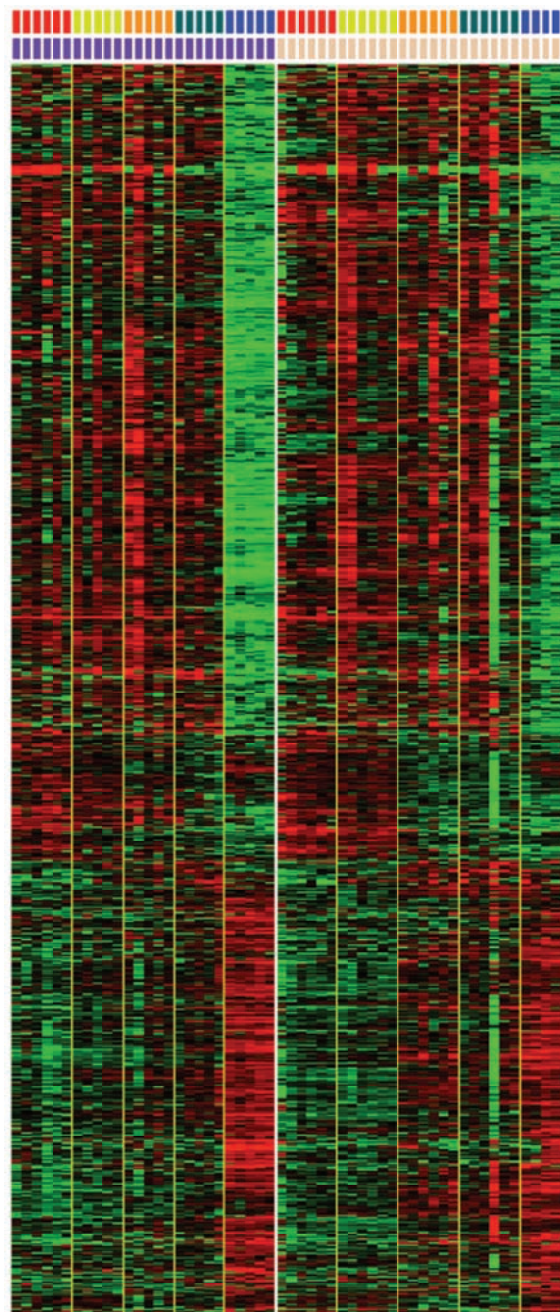

Top row of colored bars:  
Days post tumor induction

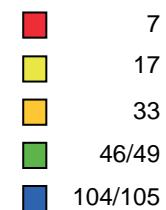

Bottom row of colored bars:  
Study

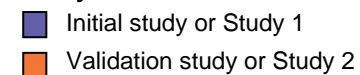

Heatmap:  
Fold expression change

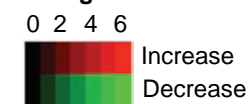

PC only (Study 1)    PC only (Study 2)

**Figure S3**

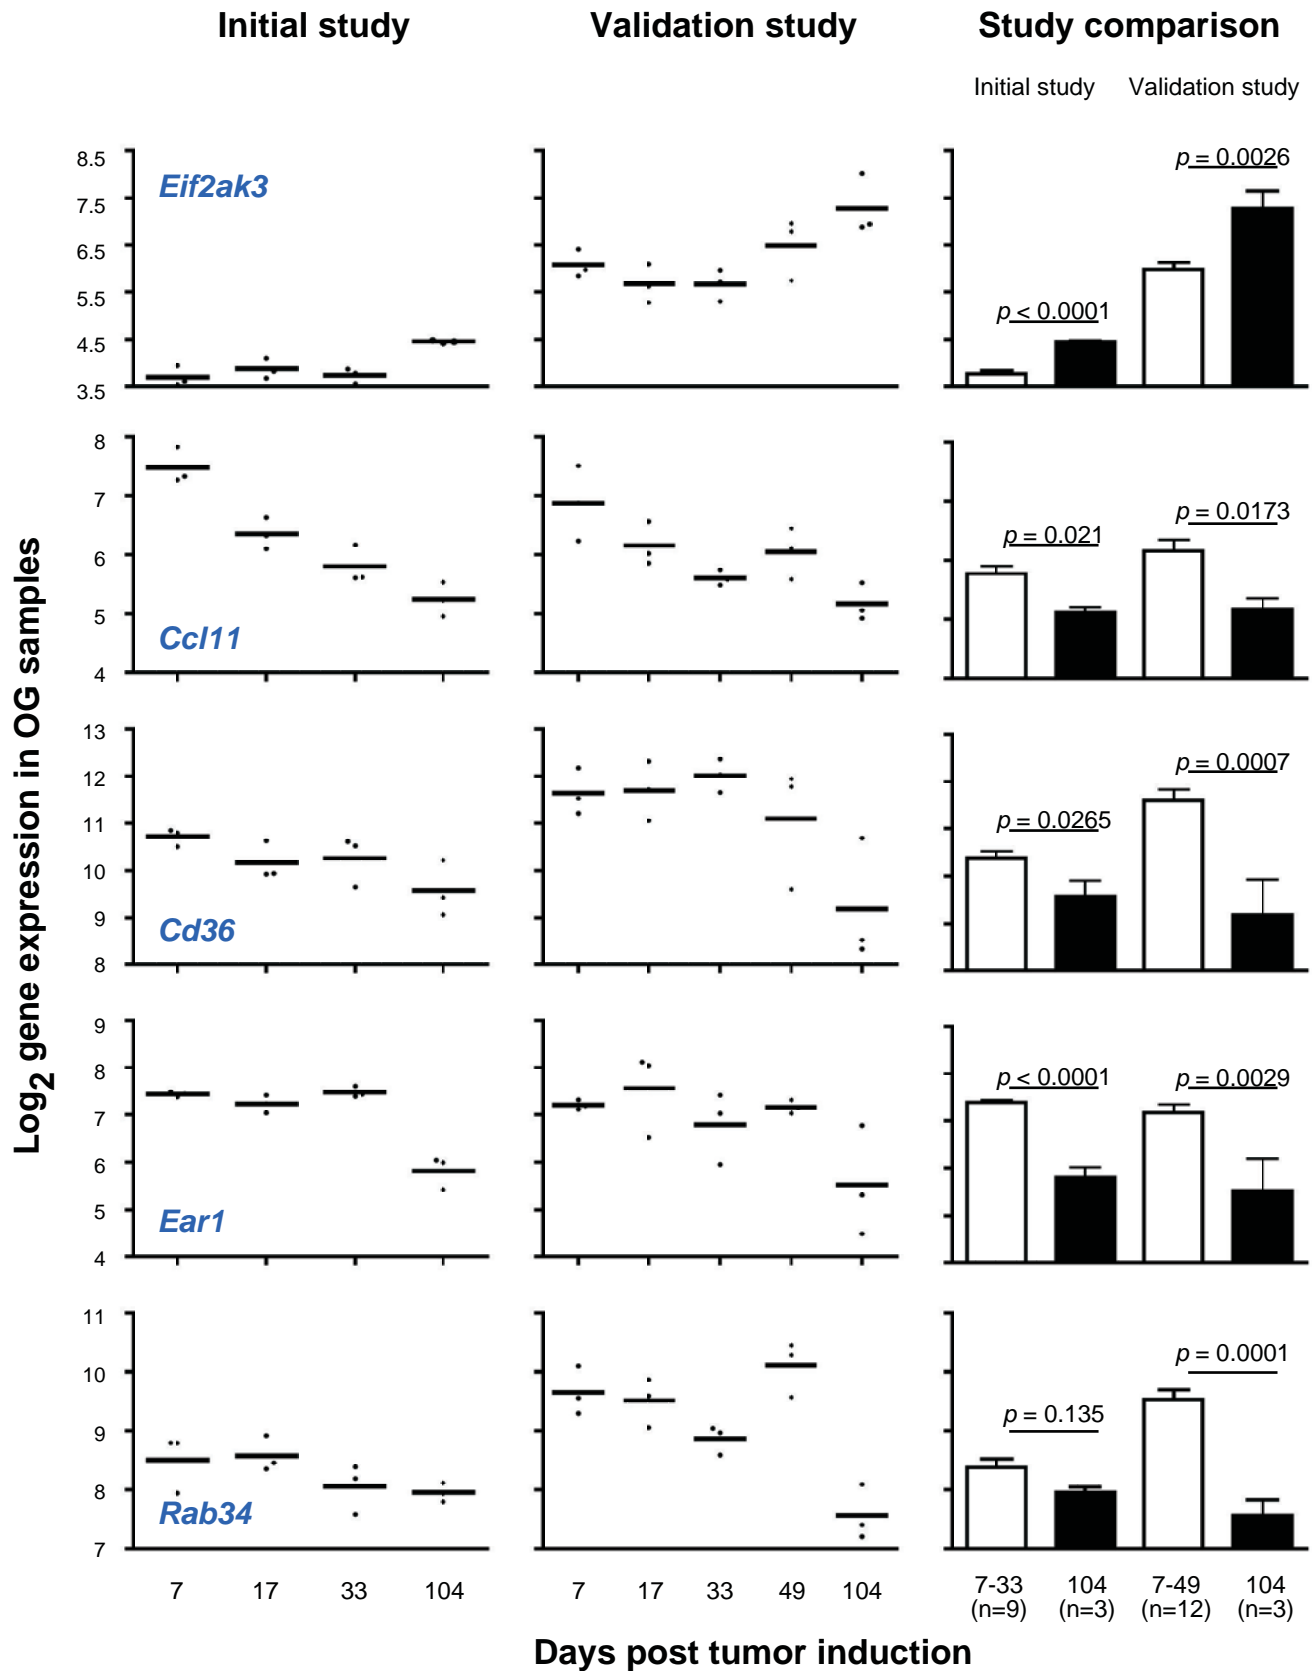

**Figure S4**

**A** GeneGo Pathway Maps  
 Statistically significant maps  
 PC w/o OG (1224 network objects)  
 Validation study (Study 2)  
 FDR 0.0001

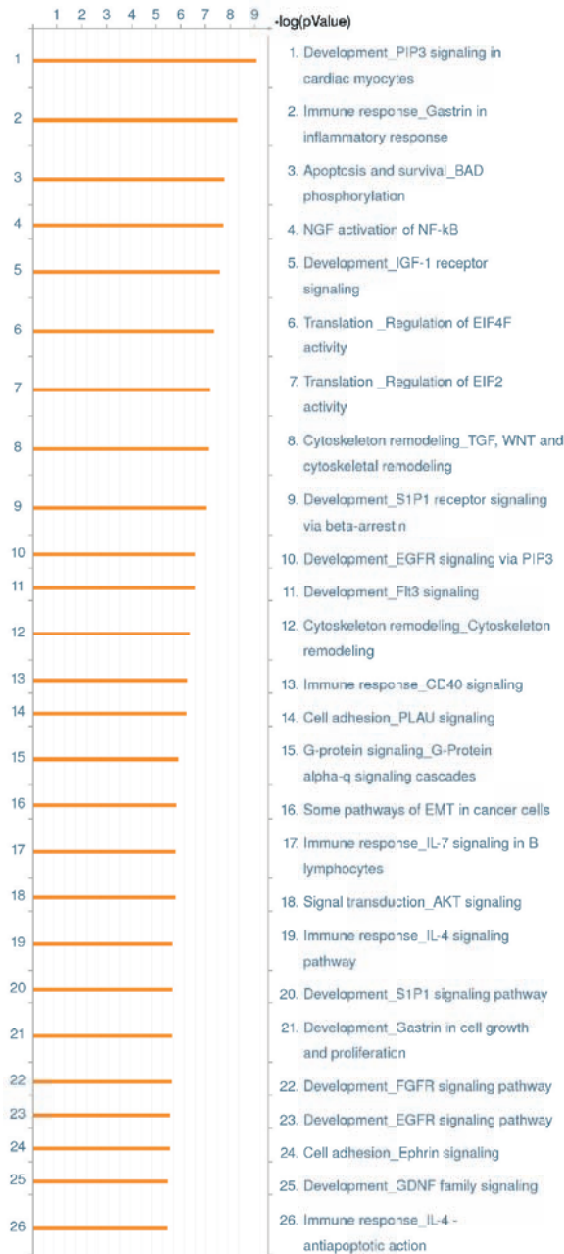

**B** GeneGo Pathway Maps  
 Statistically significant maps  
 PC w/o OG (2511 network objects)  
 Initial study (Study 1)  
 FDR 0.0001

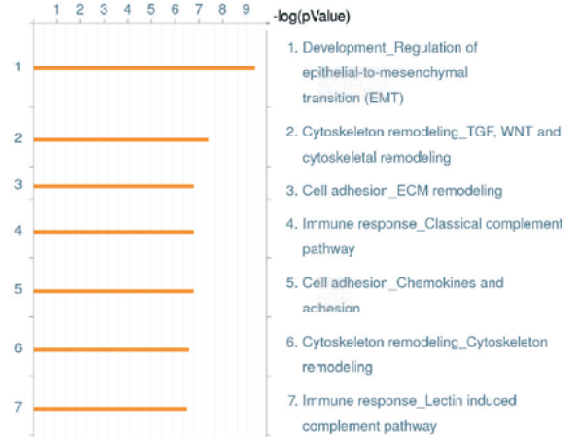

**C** GeneGo Pathway Maps  
 Similarity by maps  
 PC w/o OG  
 Comparison of Studies 1 and 2  
 FDR 0.001

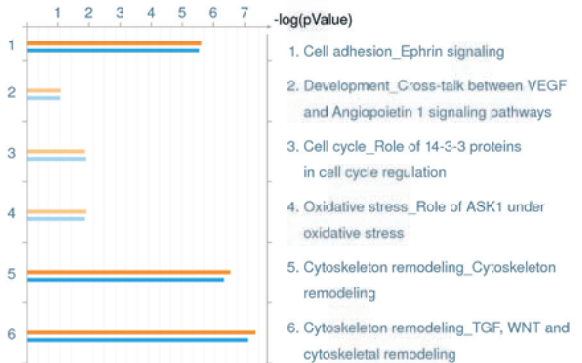

**Figure S5**

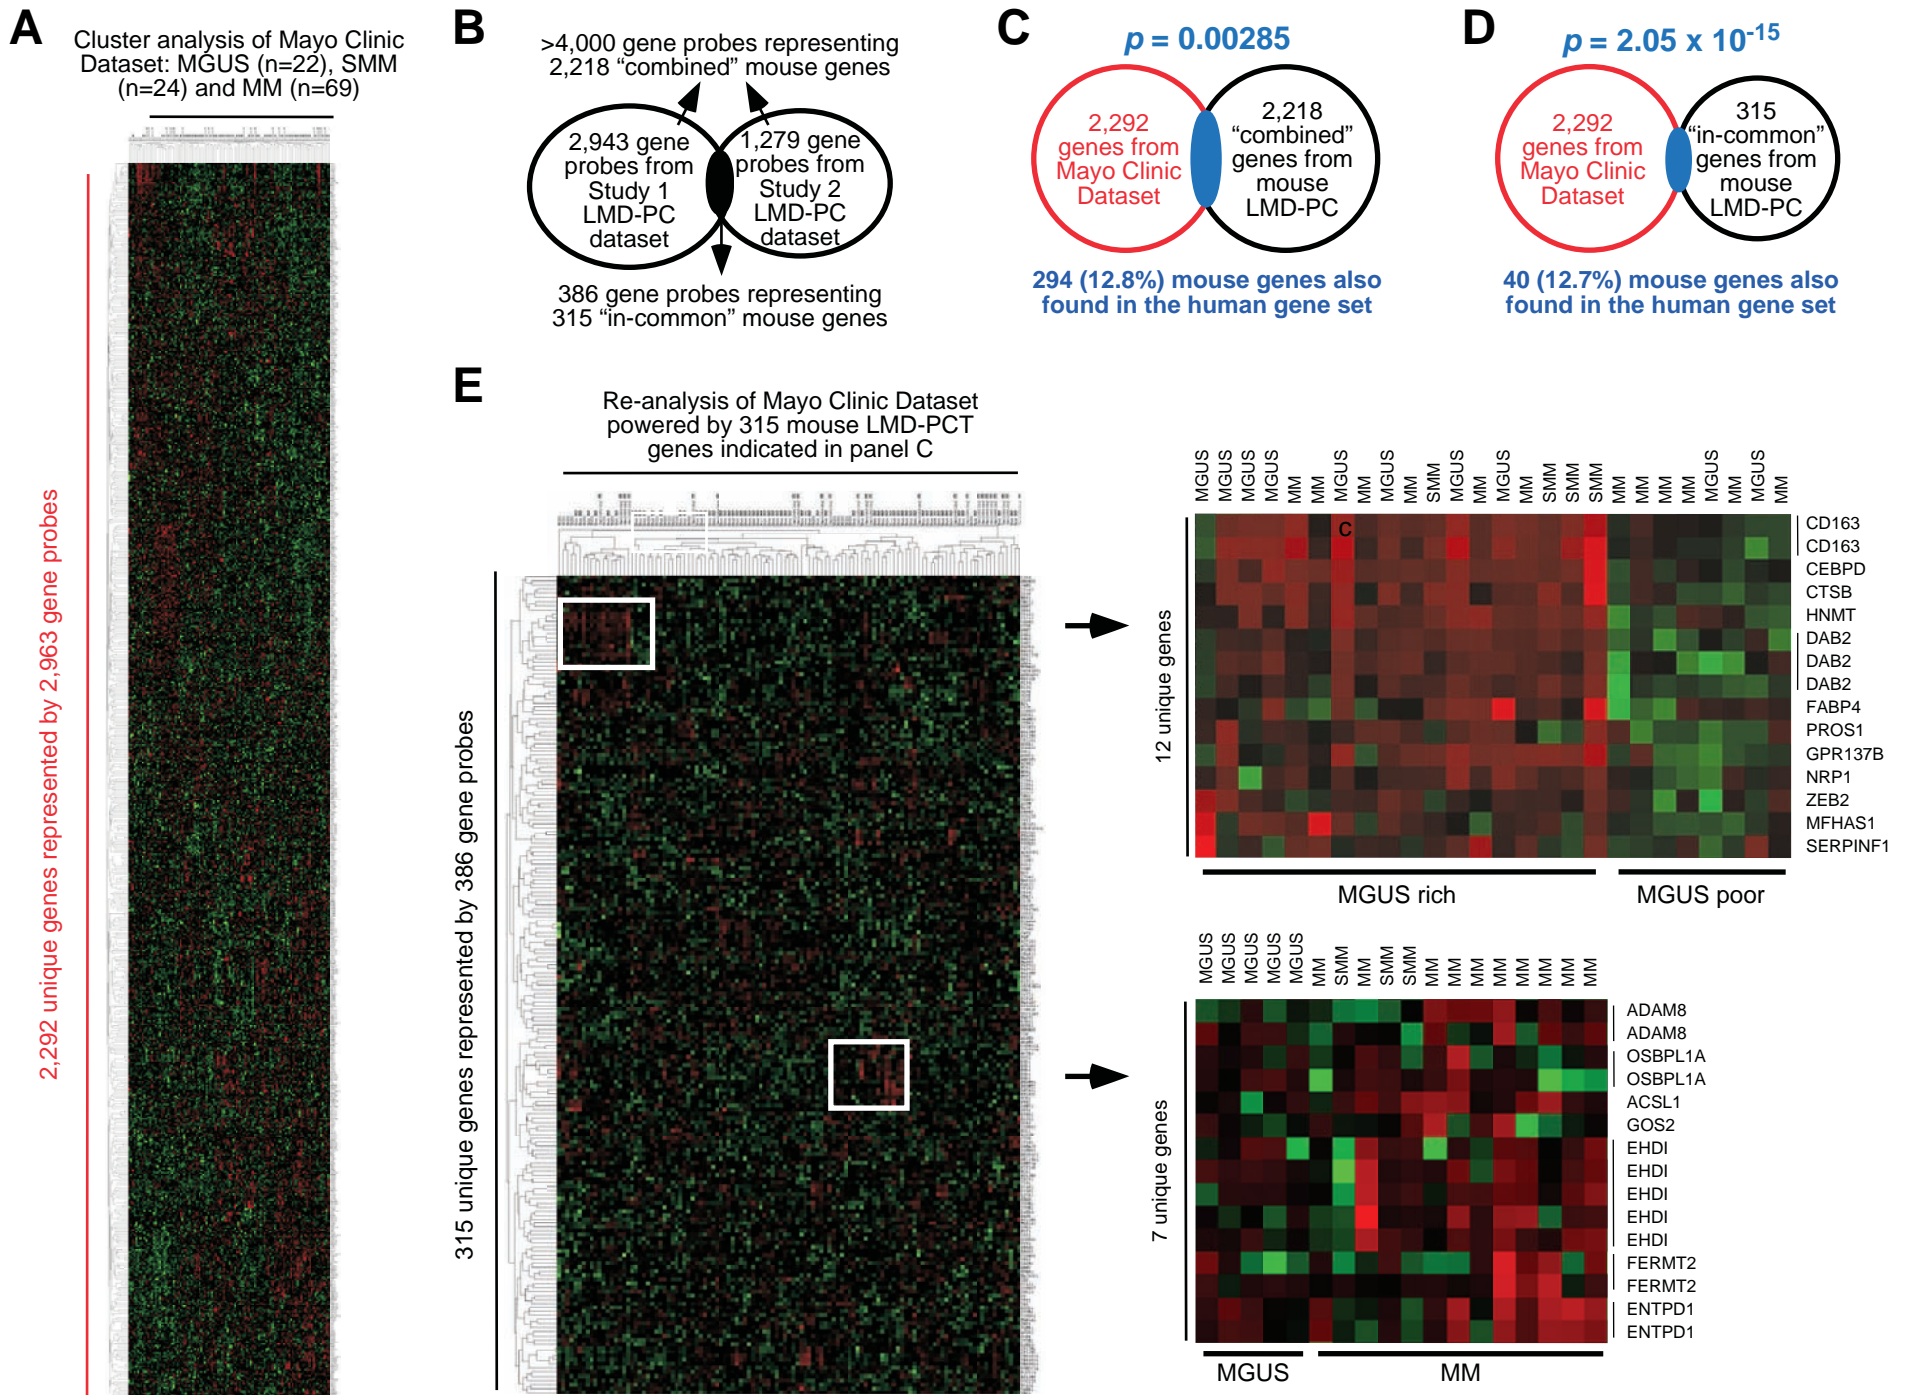

**Figure S6**
